# Supplementary material for: Reaction-based fluorogenic probes for selective detection of cysteinyl oxidation in living cells
Source: Research Square preprint supplement (doi:10.21203/rs.3.rs-956877/v1), 2021-10-19
Supplement: Supplementary file 1 [file 9558882bce58ad4769480ea9.xlsx]

## Sheet: SB-216763
Rank	Leading AC	Site	Genename	Description	Modified sequences	Spectrum count	All ratio	Ratio average	Ratio SD	Total spectrum count	Repeat counts	Function annotation
1	Q01082	112	SPTBN1	SPTB2_HUMAN Spectrin beta chain, non-erythrocytic 1 OS=Homo sapiens OX=9606 GN=SPTBN1 PE=1 SV=2	IHC(BTD[C])LENVDK|	2|	8.84|	8.84	NA	2	1
2	P35754	26	GLRX	GLRX1_HUMAN Glutaredoxin-1 OS=Homo sapiens OX=9606 GN=GLRX PE=1 SV=2	KPTCPYC(BTD[C])R FIKPTCPYC(BTD[C])R|	2|	7.81|	7.81	NA	2	1	Disulfide bond
3	Q16836	211	HADH	HCDH_HUMAN Hydroxyacyl-coenzyme A dehydrogenase, mitochondrial OS=Homo sapiens OX=9606 GN=HADH PE=1 SV=3	HPVSC(BTD[C])K|HPVSC(BTD[C])K	3|1	8.49|6.8	7.645	1.19501	4	2
4	P00352	370	ALDH1A1	AL1A1_HUMAN Retinal dehydrogenase 1 OS=Homo sapiens OX=9606 GN=ALDH1A1 PE=1 SV=2	LEC(BTD[C])GGGPWGNK|LEC(BTD[C])GGGPWGNK	3|2	5.42|9.625	7.5225	2.97338	5	2
5	Q9Y3B8	137	REXO2	ORN_HUMAN Oligoribonuclease, mitochondrial OS=Homo sapiens OX=9606 GN=REXO2 PE=1 SV=3	|QQTPPGLC(BTD[C])PLAGNSVHEDKK	|1	|7.21	7.21	NA	1	1
6	O14818	91	PSMA7	PSA7_HUMAN Proteasome subunit alpha type-7 OS=Homo sapiens OX=9606 GN=PSMA7 PE=1 SV=1	VEC(BTD[C])QSHR|VEC(BTD[C])QSHR	2|1	7.53|6.79	7.16	0.52326	3	2
7	P07237	343	P4HB	PDIA1_HUMAN Protein disulfide-isomerase OS=Homo sapiens OX=9606 GN=P4HB PE=1 SV=3	ITEFC(BTD[C])HR|ITEFC(BTD[C])HR	1|1	9.12|4.92	7.02	2.96985	2	2
8	P78417	192	GSTO1	GSTO1_HUMAN Glutathione S-transferase omega-1 OS=Homo sapiens OX=9606 GN=GSTO1 PE=1 SV=2	LNEC(BTD[C])VDHTPK|	1|	6.63|	6.63	NA	1	1
9	P21108	284	PRPS1L1	PRPS3_HUMAN Ribose-phosphate pyrophosphokinase 3 OS=Homo sapiens OX=9606 GN=PRPS1L1 PE=1 SV=2	MKHC(BTD[C])SK|	1|	6.52|	6.52	NA	1	1
10	P11908	284	PRPS2	PRPS2_HUMAN Ribose-phosphate pyrophosphokinase 2 OS=Homo sapiens OX=9606 GN=PRPS2 PE=1 SV=2	MKHC(BTD[C])TK|	1|	6.51|	6.51	NA	1	1
11	P06744	404	GPI	G6PI_HUMAN Glucose-6-phosphate isomerase OS=Homo sapiens OX=9606 GN=GPI PE=1 SV=4	MIPC(BTD[C])DFLIPVQTQHPIR|MIPC(BTD[C])DFLIPVQTQHPIR	2|2	6.24|6.39	6.315	0.10607	4	2
12	P09211	15	GSTP1	GSTP1_HUMAN Glutathione S-transferase P OS=Homo sapiens OX=9606 GN=GSTP1 PE=1 SV=2	GRC(BTD[C])AALR|GRC(BTD[C])AALR	2|1	6.21|5.48	5.845	0.51619	3	2
13	Q14934	688	NFATC4	NFAC4_HUMAN Nuclear factor of activated T-cells, cytoplasmic 4 OS=Homo sapiens OX=9606 GN=NFATC4 PE=1 SV=2	|FLPVIC(BTD[C])K	|2	|5.595	5.595	NA	2	1
14	Q6IS14	73	EIF5AL1	IF5AL_HUMAN Eukaryotic translation initiation factor 5A-1-like OS=Homo sapiens OX=9606 GN=EIF5AL1 PE=2 SV=2	|YEDIC(BTD[C])PSTHNMDVPNIK	|1	|5.54	5.54	NA	1	1
15	P10809	442	HSPD1	CH60_HUMAN 60 kDa heat shock protein, mitochondrial OS=Homo sapiens OX=9606 GN=HSPD1 PE=1 SV=2	|AAVEEGIVLGGGC(BTD[C])ALLR	|2	|5.47	5.47	NA	2	1
16	Q14764	59	MVP	MVP_HUMAN Major vault protein OS=Homo sapiens OX=9606 GN=MVP PE=1 SV=4	HYC(BTD[C])TVANPVSR|	1|	5.27|	5.27	NA	1	1
17	P60174	255	TPI1	TPIS_HUMAN Triosephosphate isomerase OS=Homo sapiens OX=9606 GN=TPI1 PE=1 SV=3	|IIYGGSVTGATC(BTD[C])K	|1	|5.27	5.27	NA	1	1
18	P40926	212	MDH2	MDHM_HUMAN Malate dehydrogenase, mitochondrial OS=Homo sapiens OX=9606 GN=MDH2 PE=1 SV=3	TIIPLISQC(BTD[C])TPK|	2|	5.19|	5.19	NA	2	1
19	P22314	179	UBA1	UBA1_HUMAN Ubiquitin-like modifier-activating enzyme 1 OS=Homo sapiens OX=9606 GN=UBA1 PE=1 SV=3	VGEFC(BTD[C])HNR|	1|	5.11|	5.11	NA	1	1
20	P10599	35	TXN	THIO_HUMAN Thioredoxin OS=Homo sapiens OX=9606 GN=TXN PE=1 SV=3	WCGPC(BTD[C])K TWCGPC(BTD[C])K ATWCGPC(BTD[C])K SATWCGPC(BTD[C])K FSATWCGPC(BTD[C])K|SATWCGPC(BTD[C])K FSATWCGPC(BTD[C])K	9|2	4.45|5.73	5.09	0.9051	11	2	Active site, Disulfide bond
21	Q07812	62	BAX	BAX_HUMAN Apoptosis regulator BAX OS=Homo sapiens OX=9606 GN=BAX PE=1 SV=1	LSEC(BTD[C])LKR|	1|	5.02|	5.02	NA	1	1
22	P27695	208	APEX1	APEX1_HUMAN DNA-(apurinic or apyrimidinic site) lyase OS=Homo sapiens OX=9606 GN=APEX1 PE=1 SV=2	KPLVLC(BTD[C])GDLNVAHEEIDLR|	1|	5.0|	5	NA	1	1
23	Q9NZM1	1392	MYOF	MYOF_HUMAN Myoferlin OS=Homo sapiens OX=9606 GN=MYOF PE=1 SV=1	KPVVGQC(BTD[C])TIER|KPVVGQC(BTD[C])TIER	3|1	4.79|4.51	4.65	0.19799	4	2
24	P00390	107	GSR	GSHR_HUMAN Glutathione reductase, mitochondrial OS=Homo sapiens OX=9606 GN=GSR PE=1 SV=2	|LGGTCVNVGC(BTD[C])VPK	|1	|4.65	4.65	NA	1	1	Disulfide bond
25	P27361	82	MAPK3	MK03_HUMAN Mitogen-activated protein kinase 3 OS=Homo sapiens OX=9606 GN=MAPK3 PE=1 SV=4	SPFEHQTYC(BTD[C])QR|SPFEHQTYC(BTD[C])QR	3|1	5.29|3.98	4.635	0.92631	4	2
26	P49915	554	GMPS	GUAA_HUMAN GMP synthase [glutamine-hydrolyzing] OS=Homo sapiens OX=9606 GN=GMPS PE=1 SV=1	|MC(BTD[C])HNVNR	|2	|4.56	4.56	NA	2	1
27	Q00610	1205	CLTC	CLH1_HUMAN Clathrin heavy chain 1 OS=Homo sapiens OX=9606 GN=CLTC PE=1 SV=5	LAELEEFINGPNNAHIQQVGDRC(BTD[C])YDEK|	1|	4.47|	4.47	NA	1	1
28	P09211	48	GSTP1	GSTP1_HUMAN Glutathione S-transferase P OS=Homo sapiens OX=9606 GN=GSTP1 PE=1 SV=2	|SC(BTD[C])LYGQLPK	|1	|4.36	4.36	NA	1	1
29	P63000	105	RAC1	RAC1_HUMAN Ras-related C3 botulinum toxin substrate 1 OS=Homo sapiens OX=9606 GN=RAC1 PE=1 SV=1	HHC(BTD[C])PNTPIILVGTK|HHC(BTD[C])PNTPIILVGTK	1|1	5.69|2.74	4.215	2.08597	2	2
30	P62937	161	PPIA	PPIA_HUMAN Peptidyl-prolyl cis-trans isomerase A OS=Homo sapiens OX=9606 GN=PPIA PE=1 SV=2	KITIADC(BTD[C])GQLE|	1|	4.21|	4.21	NA	1	1
31	O43684	270	BUB3	BUB3_HUMAN Mitotic checkpoint protein BUB3 OS=Homo sapiens OX=9606 GN=BUB3 PE=1 SV=1	LC(BTD[C])QFHR|	1|	4.15|	4.15	NA	1	1
32	P50395	302	GDI2	GDIB_HUMAN Rab GDP dissociation inhibitor beta OS=Homo sapiens OX=9606 GN=GDI2 PE=1 SV=2	VIC(BTD[C])ILSHPIK|VIC(BTD[C])ILSHPIK	2|1	3.245|5.01	4.1275	1.24804	3	2
33	P07099	182	EPHX1	HYEP_HUMAN Epoxide hydrolase 1 OS=Homo sapiens OX=9606 GN=EPHX1 PE=1 SV=1	NHGLSDEHVFEVIC(BTD[C])PSIPGYGFSEASSK|	1|	4.1|	4.1	NA	1	1
34	Q6NW34	419	NEPRO	NEPRO_HUMAN Nucleolus and neural progenitor protein OS=Homo sapiens OX=9606 GN=NEPRO PE=1 SV=3	|KLEC(BTD[C])IK	|2	|4.07	4.07	NA	2	1
35	P04406	247	GAPDH	G3P_HUMAN Glyceraldehyde-3-phosphate dehydrogenase OS=Homo sapiens OX=9606 GN=GAPDH PE=1 SV=3	VPTANVSVVDLTC(BTD[C])R|VPTANVSVVDLTC(BTD[C])R	3|3	4.03|4.09	4.06	0.04243	6	2
36	P07099	80	EPHX1	HYEP_HUMAN Epoxide hydrolase 1 OS=Homo sapiens OX=9606 GN=EPHX1 PE=1 SV=1	|FTPPLEDSC(BTD[C])FHYGFNSNYLK	|1	|4.04	4.04	NA	1	1
37	Q9BXJ9	102	NAA15	NAA15_HUMAN N-alpha-acetyltransferase 15, NatA auxiliary subunit OS=Homo sapiens OX=9606 GN=NAA15 PE=1 SV=1	YDEAIKC(BTD[C])YR|	2|	4.03|	4.03	NA	2	1
38	P62140	126	PPP1CB	PP1B_HUMAN Serine/threonine-protein phosphatase PP1-beta catalytic subunit OS=Homo sapiens OX=9606 GN=PPP1CB PE=1 SV=3	GNHEC(BTD[C])ASINR|GNHEC(BTD[C])ASINR	1|1	3.94|4.06	4	0.08485	2	2
39	P40925	251	MDH1	MDHC_HUMAN Malate dehydrogenase, cytoplasmic OS=Homo sapiens OX=9606 GN=MDH1 PE=1 SV=4	AIC(BTD[C])DHVR|	1|	3.98|	3.98	NA	1	1
40	P61289	133	PSME3	PSME3_HUMAN Proteasome activator complex subunit 3 OS=Homo sapiens OX=9606 GN=PSME3 PE=1 SV=1	LLIEKC(BTD[C])NTVK|	1|	3.97|	3.97	NA	1	1
41	Q9BXP5	490	SRRT	SRRT_HUMAN Serrate RNA effector molecule homolog OS=Homo sapiens OX=9606 GN=SRRT PE=1 SV=1	|LREC(BTD[C])ELSPGVNR	|1	|3.93	3.93	NA	1	1
42	Q15393	1156	SF3B3	SF3B3_HUMAN Splicing factor 3B subunit 3 OS=Homo sapiens OX=9606 GN=SF3B3 PE=1 SV=4	SEHPPLC(BTD[C])GR|	1|	3.92|	3.92	NA	1	1
43	P35232	69	PHB	PHB_HUMAN Prohibitin OS=Homo sapiens OX=9606 GN=PHB PE=1 SV=1	VQKPIIFDC(BTD[C])R|PIIFDC(BTD[C])R	1|1	2.61|5.0	3.805	1.68999	2	2
44	O15144	120	ARPC2	ARPC2_HUMAN Actin-related protein 2/3 complex subunit 2 OS=Homo sapiens OX=9606 GN=ARPC2 PE=1 SV=1	NC(BTD[C])FASVFEK|NC(BTD[C])FASVFEK	1|1	3.85|3.7	3.775	0.10607	2	2
45	P60174	164	TPI1	TPIS_HUMAN Triosephosphate isomerase OS=Homo sapiens OX=9606 GN=TPI1 PE=1 SV=3	VAHALAEGLGVIAC(BTD[C])IGEK|VAHALAEGLGVIAC(BTD[C])IGEK	2|1	3.845|3.69	3.7675	0.1096	3	2
46	P07237	312	P4HB	PDIA1_HUMAN Protein disulfide-isomerase OS=Homo sapiens OX=9606 GN=P4HB PE=1 SV=3	KEEC(BTD[C])PAVR|KEEC(BTD[C])PAVR	2|3	3.69|3.82	3.755	0.09192	5	2
47	Q16881	214	TXNRD1	TRXR1_HUMAN Thioredoxin reductase 1, cytoplasmic OS=Homo sapiens OX=9606 GN=TXNRD1 PE=1 SV=3	WGLGGTCVNVGC(BTD[C])IPK|	1|	3.73|	3.73	NA	1	1	Disulfide bond
48	P00390	461	GSR	GSHR_HUMAN Glutathione reductase, mitochondrial OS=Homo sapiens OX=9606 GN=GSR PE=1 SV=2	TKC(BTD[C])VMK|TKC(BTD[C])VMK	2|4	4.045|3.4	3.7225	0.45608	6	2
49	P09936	90	UCHL1	UCHL1_HUMAN Ubiquitin carboxyl-terminal hydrolase isozyme L1 OS=Homo sapiens OX=9606 GN=UCHL1 PE=1 SV=2	|QTIGNSC(BTD[C])GTIGLIHAVANNQDK	|1	|3.7	3.7	NA	1	1	Active site
50	P32969	74	RPL9	RL9_HUMAN 60S ribosomal protein L9 OS=Homo sapiens OX=9606 GN=RPL9 PE=1 SV=1	TIC(BTD[C])SHVQNMIK|TIC(BTD[C])SHVQNMIK	1|1	4.74|2.59	3.665	1.52028	2	2
51	Q14152	478	EIF3A	EIF3A_HUMAN Eukaryotic translation initiation factor 3 subunit A OS=Homo sapiens OX=9606 GN=EIF3A PE=1 SV=1	HC(BTD[C])DLQVR|	1|	3.43|	3.43	NA	1	1
52	Q01469	67	FABP5	FABP5_HUMAN Fatty acid-binding protein 5 OS=Homo sapiens OX=9606 GN=FABP5 PE=1 SV=3	TTQFSC(BTD[C])TLGEK|	1|	3.42|	3.42	NA	1	1
53	P17655	640	CAPN2	CAN2_HUMAN Calpain-2 catalytic subunit OS=Homo sapiens OX=9606 GN=CAPN2 PE=1 SV=6	MPC(BTD[C])QLHQVIVAR|MPC(BTD[C])QLHQVIVAR	3|4	3.38|3.37	3.375	0.00707	7	2
54	P21333	1453	FLNA	FLNA_HUMAN Filamin-A OS=Homo sapiens OX=9606 GN=FLNA PE=1 SV=4	|VKC(BTD[C])SGPGLSPGMVR	|3	|3.34	3.34	NA	3	1
55	P23528	80	CFL1	COF1_HUMAN Cofilin-1 OS=Homo sapiens OX=9606 GN=CFL1 PE=1 SV=3	MLPDKDC(BTD[C])R|MLPDKDC(BTD[C])R	2|1	2.135|4.48	3.3075	1.65817	3	2
56	P38646	608	HSPA9	GRP75_HUMAN Stress-70 protein, mitochondrial OS=Homo sapiens OX=9606 GN=HSPA9 PE=1 SV=2	MEEFKDQLPADEC(BTD[C])NKLK|MEEFKDQLPADEC(BTD[C])NKLK	1|1	3.7|2.91	3.305	0.55861	2	2
57	Q8WUM4	512	PDCD6IP	PDC6I_HUMAN Programmed cell death 6-interacting protein OS=Homo sapiens OX=9606 GN=PDCD6IP PE=1 SV=1	EC(BTD[C])YQSHR|	1|	3.28|	3.28	NA	1	1
58	P26368	429	U2AF2	U2AF2_HUMAN Splicing factor U2AF 65 kDa subunit OS=Homo sapiens OX=9606 GN=U2AF2 PE=1 SV=4	|SIEIPRPVDGVEVPGC(BTD[C])GK	|1	|3.28	3.28	NA	1	1
59	O75369	1952	FLNB	FLNB_HUMAN Filamin-B OS=Homo sapiens OX=9606 GN=FLNB PE=1 SV=2	DEPC(BTD[C])LLK|	1|	3.27|	3.27	NA	1	1
60	P46782	66	RPS5	RS5_HUMAN 40S ribosomal protein S5 OS=Homo sapiens OX=9606 GN=RPS5 PE=1 SV=4	KAQC(BTD[C])PIVER|KAQC(BTD[C])PIVER AQC(BTD[C])PIVER	2|3	3.195|3.28	3.2375	0.0601	5	2
61	Q9Y4Z0	59	LSM4	LSM4_HUMAN U6 snRNA-associated Sm-like protein LSm4 OS=Homo sapiens OX=9606 GN=LSM4 PE=1 SV=1	MPEC(BTD[C])YIR|MPEC(BTD[C])YIR	1|1	2.63|3.82	3.225	0.84146	2	2
62	P09110	381	ACAA1	THIK_HUMAN 3-ketoacyl-CoA thiolase, peroxisomal OS=Homo sapiens OX=9606 GN=ACAA1 PE=1 SV=2	VNPLGGAVALGHPLGC(BTD[C])TGAR|VNPLGGAVALGHPLGC(BTD[C])TGAR	1|1	3.03|3.34	3.185	0.2192	2	2
63	P43897	64	TSFM	EFTS_HUMAN Elongation factor Ts, mitochondrial OS=Homo sapiens OX=9606 GN=TSFM PE=1 SV=2	YSFVNC(BTD[C])K|	1|	3.17|	3.17	NA	1	1
64	P36542	103	ATP5F1C	ATPG_HUMAN ATP synthase subunit gamma, mitochondrial OS=Homo sapiens OX=9606 GN=ATP5F1C PE=1 SV=1	GLC(BTD[C])GAIHSSIAK|GLC(BTD[C])GAIHSSIAK	1|3	3.2|3.13	3.165	0.0495	4	2
65	P62191	58	PSMC1	PRS4_HUMAN 26S proteasome regulatory subunit 4 OS=Homo sapiens OX=9606 GN=PSMC1 PE=1 SV=1	LPLVTPHTQC(BTD[C])R|LPLVTPHTQC(BTD[C])R	2|1	3.63|2.68	3.155	0.67175	3	2
66	P21333	1165	FLNA	FLNA_HUMAN Filamin-A OS=Homo sapiens OX=9606 GN=FLNA PE=1 SV=4	VKC(BTD[C])SGPGLER|VKC(BTD[C])SGPGLER	2|4	3.23|2.98	3.105	0.17678	6	2
67	P14923	511	JUP	PLAK_HUMAN Junction plakoglobin OS=Homo sapiens OX=9606 GN=JUP PE=1 SV=3	|NLALC(BTD[C])PANHAPLQEAAVIPR	|1	|3.09	3.09	NA	1	1
68	P48637	409	GSS	GSHB_HUMAN Glutathione synthetase OS=Homo sapiens OX=9606 GN=GSS PE=1 SV=1	IEPEPFENC(BTD[C])LLRPGSPAR|IEPEPFENC(BTD[C])LLRPGSPAR	1|1	3.81|2.36	3.085	1.0253	2	2
69	P23528	139	CFL1	COF1_HUMAN Cofilin-1 OS=Homo sapiens OX=9606 GN=CFL1 PE=1 SV=3	HELQANC(BTD[C])YEEVKDR|HELQANC(BTD[C])YEEVKDR	1|1	3.89|2.25	3.07	1.15966	2	2
70	P43243	821	MATR3	MATR3_HUMAN Matrin-3 OS=Homo sapiens OX=9606 GN=MATR3 PE=1 SV=2	NTHC(BTD[C])SSLPHYQK|	1|	3.06|	3.06	NA	1	1
71	Q9H3K6	59	BOLA2	BOLA2_HUMAN BolA-like protein 2 OS=Homo sapiens OX=9606 GN=BOLA2 PE=1 SV=1	VNAC(BTD[C])LAEELPHIHAFEQK|LVNAC(BTD[C])LAEELPHIHAFEQK	1|2	2.35|3.77	3.06	1.00409	3	2
72	Q9Y5X3	227	SNX5	SNX5_HUMAN Sorting nexin-5 OS=Homo sapiens OX=9606 GN=SNX5 PE=1 SV=1	IKDSC(BTD[C])VK|	1|	3.05|	3.05	NA	1	1
73	P30838	217	ALDH3A1	AL3A1_HUMAN Aldehyde dehydrogenase, dimeric NADP-preferring OS=Homo sapiens OX=9606 GN=ALDH3A1 PE=1 SV=3	SPC(BTD[C])YVDK|SPC(BTD[C])YVDK	1|3	2.99|3.11	3.05	0.08485	4	2
74	P78371	289	CCT2	TCPB_HUMAN T-complex protein 1 subunit beta OS=Homo sapiens OX=9606 GN=CCT2 PE=1 SV=4	HGINC(BTD[C])FINR|	1|	3.03|	3.03	NA	1	1
75	P09382	43	LGALS1	LEG1_HUMAN Galectin-1 OS=Homo sapiens OX=9606 GN=LGALS1 PE=1 SV=2	C(BTD[C])LHFNPR NNLC(BTD[C])LHFNPR LC(BTD[C])LHFNPR|SNNLC(BTD[C])LHFNPR LC(BTD[C])LHFNPR DSNNLC(BTD[C])LHFNPR	4|7	2.965|3.06	3.0125	0.06718	11	2
76	P07910	46	HNRNPC	HNRPC_HUMAN Heterogeneous nuclear ribonucleoproteins C1/C2 OS=Homo sapiens OX=9606 GN=HNRNPC PE=1 SV=4	VGC(BTD[C])SVHK IVGC(BTD[C])SVHK|VGC(BTD[C])SVHK IVGC(BTD[C])SVHK GC(BTD[C])SVHK	5|8	3.03|2.96	2.995	0.0495	13	2
77	P09936	132	UCHL1	UCHL1_HUMAN Ubiquitin carboxyl-terminal hydrolase isozyme L1 OS=Homo sapiens OX=9606 GN=UCHL1 PE=1 SV=2	AKC(BTD[C])FEK|AKC(BTD[C])FEK	1|3	2.88|3.04	2.96	0.11314	4	2
78	O00410	1057	IPO5	IPO5_HUMAN Importin-5 OS=Homo sapiens OX=9606 GN=IPO5 PE=1 SV=4	HEDPC(BTD[C])AK|	2|	2.95|	2.95	NA	2	1
79	P08651	104	NFIC	NFIC_HUMAN Nuclear factor 1 C-type OS=Homo sapiens OX=9606 GN=NFIC PE=1 SV=2	KAPGC(BTD[C])VLSNPDQK|	1|	2.95|	2.95	NA	1	1
80	Q9NZM1	1919	MYOF	MYOF_HUMAN Myoferlin OS=Homo sapiens OX=9606 GN=MYOF PE=1 SV=1	SPEKC(BTD[C])R|SPEKC(BTD[C])R	1|4	3.02|2.875	2.9475	0.10253	5	2
81	P09651	175	HNRNPA1	ROA1_HUMAN Heterogeneous nuclear ribonucleoprotein A1 OS=Homo sapiens OX=9606 GN=HNRNPA1 PE=1 SV=5	YHTVNGHNC(BTD[C])EVR GHNC(BTD[C])EVR|GHNC(BTD[C])EVR YHTVNGHNC(BTD[C])EVR	2|2	2.845|2.935	2.89	0.06364	4	2
82	O15067	512	PFAS	PUR4_HUMAN Phosphoribosylformylglycinamidine synthase OS=Homo sapiens OX=9606 GN=PFAS PE=1 SV=4	GNPIC(BTD[C])SLHDQGAGGNGNVLK|	1|	2.88|	2.88	NA	1	1
83	P14868	130	DARS	SYDC_HUMAN Aspartate--tRNA ligase, cytoplasmic OS=Homo sapiens OX=9606 GN=DARS PE=1 SV=2	IGSC(BTD[C])TQQDVELHVQK|	1|	2.83|	2.83	NA	1	1
84	Q14444	226	CAPRIN1	CAPR1_HUMAN Caprin-1 OS=Homo sapiens OX=9606 GN=CAPRIN1 PE=1 SV=2	EKPVC(BTD[C])GTTYK|	1|	2.8|	2.8	NA	1	1
85	O00566	27	MPHOSPH10	MPP10_HUMAN U3 small nucleolar ribonucleoprotein protein MPP10 OS=Homo sapiens OX=9606 GN=MPHOSPH10 PE=1 SV=2	|ATGRPEC(BTD[C])FLTIQEGLASK	|1	|2.79	2.79	NA	1	1
86	Q9Y316	244	MEMO1	MEMO1_HUMAN Protein MEMO1 OS=Homo sapiens OX=9606 GN=MEMO1 PE=1 SV=1	YHNTIC(BTD[C])GR|	1|	2.78|	2.78	NA	1	1
87	P31930	410	UQCRC1	QCR1_HUMAN Cytochrome b-c1 complex subunit 1, mitochondrial OS=Homo sapiens OX=9606 GN=UQCRC1 PE=1 SV=3	NALVSHLDGTTPVC(BTD[C])EDIGR|	1|	2.77|	2.77	NA	1	1
88	P62244	30	RPS15A	RS15A_HUMAN 40S ribosomal protein S15a OS=Homo sapiens OX=9606 GN=RPS15A PE=1 SV=2	VLIRPC(BTD[C])SK QVLIRPC(BTD[C])SK|LIRPC(BTD[C])SK QVLIRPC(BTD[C])SK	4|3	2.445|3.08	2.7625	0.44901	7	2
89	P49368	40	CCT3	TCPG_HUMAN T-complex protein 1 subunit gamma OS=Homo sapiens OX=9606 GN=CCT3 PE=1 SV=4	TC(BTD[C])LGPK|	1|	2.75|	2.75	NA	1	1
90	Q14CX7	364	NAA25	NAA25_HUMAN N-alpha-acetyltransferase 25, NatB auxiliary subunit OS=Homo sapiens OX=9606 GN=NAA25 PE=1 SV=1	FGDKPC(BTD[C])CFTDLK|	1|	2.73|	2.73	NA	1	1
91	Q9BRX8	85	PRXL2A	PXL2A_HUMAN Peroxiredoxin-like 2A OS=Homo sapiens OX=9606 GN=PRXL2A PE=1 SV=3	|RPGC(BTD[C])FLCR	|1	|2.73	2.73	NA	1	1	Active site
92	P09429	23	HMGB1	HMGB1_HUMAN High mobility group protein B1 OS=Homo sapiens OX=9606 GN=HMGB1 PE=1 SV=3	|FVQTC(BTD[C])R	|1	|2.71	2.71	NA	1	1	Modified residue, Disulfide bond
93	O75390	211	CS	CISY_HUMAN Citrate synthase, mitochondrial OS=Homo sapiens OX=9606 GN=CS PE=1 SV=2	LPC(BTD[C])VAAK|LPC(BTD[C])VAAK	3|1	2.68|2.71	2.695	0.02121	4	2
94	P49327	779	FASN	FAS_HUMAN Fatty acid synthase OS=Homo sapiens OX=9606 GN=FASN PE=1 SV=3	GLKPSC(BTD[C])TIIPLMK|GLKPSC(BTD[C])TIIPLMK	3|1	2.9|2.49	2.695	0.28991	4	2
95	P63165	52	SUMO1	SUMO1_HUMAN Small ubiquitin-related modifier 1 OS=Homo sapiens OX=9606 GN=SUMO1 PE=1 SV=1	LKESYC(BTD[C])QR|	1|	2.69|	2.69	NA	1	1
96	Q9BUQ8	677	DDX23	DDX23_HUMAN Probable ATP-dependent RNA helicase DDX23 OS=Homo sapiens OX=9606 GN=DDX23 PE=1 SV=3	KGC(BTD[C])DVLAK|KGC(BTD[C])DVLAK	1|1	2.77|2.61	2.69	0.11314	2	2
97	Q8IXI1	185	RHOT2	MIRO2_HUMAN Mitochondrial Rho GTPase 2 OS=Homo sapiens OX=9606 GN=RHOT2 PE=1 SV=2	QLRPAC(BTD[C])AQALTR|	1|	2.68|	2.68	NA	1	1
98	P38646	487	HSPA9	GRP75_HUMAN Stress-70 protein, mitochondrial OS=Homo sapiens OX=9606 GN=HSPA9 PE=1 SV=2	VC(BTD[C])QGER|VC(BTD[C])QGER	1|1	2.94|2.4	2.67	0.38184	2	2
99	O60841	635	EIF5B	IF2P_HUMAN Eukaryotic translation initiation factor 5B OS=Homo sapiens OX=9606 GN=EIF5B PE=1 SV=4	|APIIC(BTD[C])VLGHVDTGK	|2	|2.665	2.665	NA	2	1
100	Q14152	198	EIF3A	EIF3A_HUMAN Eukaryotic translation initiation factor 3 subunit A OS=Homo sapiens OX=9606 GN=EIF3A PE=1 SV=1	LC(BTD[C])DNLR|	1|	2.65|	2.65	NA	1	1
101	P46777	76	RPL5	RL5_HUMAN 60S ribosomal protein L5 OS=Homo sapiens OX=9606 GN=RPL5 PE=1 SV=3	IEGDMIVC(BTD[C])AAYAHELPK|IEGDMIVC(BTD[C])AAYAHELPK	1|1	2.44|2.85	2.645	0.28991	2	2
102	P60981	135	DSTN	DEST_HUMAN Destrin OS=Homo sapiens OX=9606 GN=DSTN PE=1 SV=3	HEC(BTD[C])QANGPEDLNR|HEC(BTD[C])QANGPEDLNR	3|3	2.58|2.7	2.64	0.08485	6	2
103	P62826	120	RAN	RAN_HUMAN GTP-binding nuclear protein Ran OS=Homo sapiens OX=9606 GN=RAN PE=1 SV=3	VCENIPIVLC(BTD[C])GNK|VCENIPIVLC(BTD[C])GNK	2|1	2.59|2.65	2.62	0.04243	3	2
104	P17844	89	DDX5	DDX5_HUMAN Probable ATP-dependent RNA helicase DDX5 OS=Homo sapiens OX=9606 GN=DDX5 PE=1 SV=1	|GHNC(BTD[C])PK	|2	|2.62	2.62	NA	2	1
105	P00390	467	GSR	GSHR_HUMAN Glutathione reductase, mitochondrial OS=Homo sapiens OX=9606 GN=GSR PE=1 SV=2	MVC(BTD[C])ANKEEK MVC(BTD[C])ANK|MVC(BTD[C])ANKEEK	5|1	2.6|2.6	2.6	0	6	2
106	Q9NZM1	409	MYOF	MYOF_HUMAN Myoferlin OS=Homo sapiens OX=9606 GN=MYOF PE=1 SV=1	KVC(BTD[C])TNIIEK|KVC(BTD[C])TNIIEK	3|2	2.67|2.505	2.5875	0.11667	5	2
107	P21333	1018	FLNA	FLNA_HUMAN Filamin-A OS=Homo sapiens OX=9606 GN=FLNA PE=1 SV=4	|IVGPSGAAVPC(BTD[C])K IVGPSGAAVPC(BTD[C])KVEPGLGADNSVVR	|4	|2.57	2.57	NA	4	1
108	Q16576	166	RBBP7	RBBP7_HUMAN Histone-binding protein RBBP7 OS=Homo sapiens OX=9606 GN=RBBP7 PE=1 SV=1	HPAKPDPSGEC(BTD[C])NPDLR|HPAKPDPSGEC(BTD[C])NPDLR	1|1	2.65|2.47	2.56	0.12728	2	2
109	P15121	304	AKR1B1	ALDR_HUMAN Aldo-keto reductase family 1 member B1 OS=Homo sapiens OX=9606 GN=AKR1B1 PE=1 SV=3	VCALLSC(BTD[C])TSHK|	2|	2.545|	2.545	NA	2	1
110	Q9UBQ0	36	VPS29	VPS29_HUMAN Vacuolar protein sorting-associated protein 29 OS=Homo sapiens OX=9606 GN=VPS29 PE=1 SV=1	|IQHILC(BTD[C])TGNLCTK	|1	|2.54	2.54	NA	1	1
111	P18206	545	VCL	VINC_HUMAN Vinculin OS=Homo sapiens OX=9606 GN=VCL PE=1 SV=4	QDLLAKC(BTD[C])DR|QDLLAKC(BTD[C])DR	1|5	3.05|2.01	2.53	0.73539	6	2
112	O00273	47	DFFA	DFFA_HUMAN DNA fragmentation factor subunit alpha OS=Homo sapiens OX=9606 GN=DFFA PE=1 SV=1	KAC(BTD[C])DILAIDK|	1|	2.53|	2.53	NA	1	1
113	Q9BYT8	255	NLN	NEUL_HUMAN Neurolysin, mitochondrial OS=Homo sapiens OX=9606 GN=NLN PE=1 SV=1	KC(BTD[C])CIPETR|	3|	2.52|	2.52	NA	3	1
114	P60953	157	CDC42	CDC42_HUMAN Cell division control protein 42 homolog OS=Homo sapiens OX=9606 GN=CDC42 PE=1 SV=2	YVEC(BTD[C])SALTQK|	1|	2.52|	2.52	NA	1	1
115	Q15274	96	QPRT	NADC_HUMAN Nicotinate-nucleotide pyrophosphorylase [carboxylating] OS=Homo sapiens OX=9606 GN=QPRT PE=1 SV=3	GPAHC(BTD[C])LLLGER|GPAHC(BTD[C])LLLGER	2|3	2.495|2.54	2.5175	0.03182	5	2
116	O15145	85	ARPC3	ARPC3_HUMAN Actin-related protein 2/3 complex subunit 3 OS=Homo sapiens OX=9606 GN=ARPC3 PE=1 SV=3	LQKC(BTD[C])NSK|LQKC(BTD[C])NSK	2|3	2.325|2.68	2.5025	0.25102	5	2
117	Q13404	71	UBE2V1	UB2V1_HUMAN Ubiquitin-conjugating enzyme E2 variant 1 OS=Homo sapiens OX=9606 GN=UBE2V1 PE=1 SV=2	IEC(BTD[C])GPK|IEC(BTD[C])GPK	1|1	2.4|2.59	2.495	0.13435	2	2
118	P21333	2160	FLNA	FLNA_HUMAN Filamin-A OS=Homo sapiens OX=9606 GN=FLNA PE=1 SV=4	|APSVANVGSHC(BTD[C])DLSLK	|2	|2.48	2.48	NA	2	1
119	O95372	56	LYPLA2	LYPA2_HUMAN Acyl-protein thioesterase 2 OS=Homo sapiens OX=9606 GN=LYPLA2 PE=1 SV=1	IC(BTD[C])PHAPR|IC(BTD[C])PHAPR	1|2	3.03|1.89	2.46	0.8061	3	2
120	P83111	154	LACTB	LACTB_HUMAN Serine beta-lactamase-like protein LACTB, mitochondrial OS=Homo sapiens OX=9606 GN=LACTB PE=1 SV=2	VPC(BTD[C])KPETVMR|VPC(BTD[C])KPETVMR	6|2	2.5|2.385	2.4425	0.08132	8	2
121	P50914	42	RPL14	RL14_HUMAN 60S ribosomal protein L14 OS=Homo sapiens OX=9606 GN=RPL14 PE=1 SV=4	|VDGPC(BTD[C])TQVR	|1	|2.44	2.44	NA	1	1
122	P09874	256	PARP1	PARP1_HUMAN Poly [ADP-ribose] polymerase 1 OS=Homo sapiens OX=9606 GN=PARP1 PE=1 SV=4	KVC(BTD[C])STNDLK|KVC(BTD[C])STNDLK	1|2	2.63|2.245	2.4375	0.27224	3	2
123	P61313	110	RPL15	RL15_HUMAN 60S ribosomal protein L15 OS=Homo sapiens OX=9606 GN=RPL15 PE=1 SV=2	HC(BTD[C])GALR|HC(BTD[C])GALR	1|1	2.39|2.44	2.415	0.03536	2	2
124	P62244	72	RPS15A	RS15A_HUMAN 40S ribosomal protein S15a OS=Homo sapiens OX=9606 GN=RPS15A PE=1 SV=2	|LNKC(BTD[C])GVISPR	|4	|2.415	2.415	NA	4	1
125	P38606	394	ATP6V1A	VATA_HUMAN V-type proton ATPase catalytic subunit A OS=Homo sapiens OX=9606 GN=ATP6V1A PE=1 SV=2	VKC(BTD[C])LGNPER|VKC(BTD[C])LGNPER	3|3	3.16|1.66	2.41	1.06066	6	2
126	Q2TAA2	47	IAH1	IAH1_HUMAN Isoamyl acetate-hydrolyzing esterase 1 homolog OS=Homo sapiens OX=9606 GN=IAH1 PE=1 SV=1	KC(BTD[C])DVLNR|KC(BTD[C])DVLNR	2|1	2.39|2.43	2.41	0.02828	3	2
127	P14618	474	PKM	KPYM_HUMAN Pyruvate kinase PKM OS=Homo sapiens OX=9606 GN=PKM PE=1 SV=4	|GIFPVLC(BTD[C])K	|2	|2.41	2.41	NA	2	1
128	Q9UBE0	146	SAE1	SAE1_HUMAN SUMO-activating enzyme subunit 1 OS=Homo sapiens OX=9606 GN=SAE1 PE=1 SV=1	|VDQIC(BTD[C])HK	|2	|2.4	2.4	NA	2	1
129	P15121	45	AKR1B1	ALDR_HUMAN Aldo-keto reductase family 1 member B1 OS=Homo sapiens OX=9606 GN=AKR1B1 PE=1 SV=3	HIDC(BTD[C])AHVYQNENEVGVAIQEK DC(BTD[C])AHVYQNENEVGVAIQEK IDC(BTD[C])AHVYQNENEVGVAIQEK|HIDC(BTD[C])AHVYQNENEVGVAIQEK	6|4	1.94|2.845	2.3925	0.63993	10	2
130	Q96BP2	66	CHCHD1	CHCH1_HUMAN Coiled-coil-helix-coiled-coil-helix domain-containing protein 1 OS=Homo sapiens OX=9606 GN=CHCHD1 PE=1 SV=1	FRDDAC(BTD[C])R|	1|	2.39|	2.39	NA	1	1	Disulfide bond
131	P10620	50	MGST1	MGST1_HUMAN Microsomal glutathione S-transferase 1 OS=Homo sapiens OX=9606 GN=MGST1 PE=1 SV=1	KVFANPEDC(BTD[C])VAFGK|	2|	2.39|	2.39	NA	2	1
132	P30405	104	PPIF	PPIF_HUMAN Peptidyl-prolyl cis-trans isomerase F, mitochondrial OS=Homo sapiens OX=9606 GN=PPIF PE=1 SV=1	VIPSFMC(BTD[C])QAGDFTNHNGTGGK|	1|	2.39|	2.39	NA	1	1
133	Q00610	459	CLTC	CLH1_HUMAN Clathrin heavy chain 1 OS=Homo sapiens OX=9606 GN=CLTC PE=1 SV=5	EDKLEC(BTD[C])SEELGDLVK|	1|	2.39|	2.39	NA	1	1
134	P16152	122	CBR1	CBR1_HUMAN Carbonyl reductase [NADPH] 1 OS=Homo sapiens OX=9606 GN=CBR1 PE=1 SV=3	|DVC(BTD[C])TELLPLIKPQGR	|2	|2.38	2.38	NA	2	1
135	P55036	37	PSMD4	PSMD4_HUMAN 26S proteasome non-ATPase regulatory subunit 4 OS=Homo sapiens OX=9606 GN=PSMD4 PE=1 SV=1	|LQAQQDAVNIVC(BTD[C])HSK	|1	|2.37	2.37	NA	1	1
136	O75369	2154	FLNB	FLNB_HUMAN Filamin-B OS=Homo sapiens OX=9606 GN=FLNB PE=1 SV=2	|NSHC(BTD[C])VR	|1	|2.37	2.37	NA	1	1
137	P62937	62	PPIA	PPIA_HUMAN Peptidyl-prolyl cis-trans isomerase A OS=Homo sapiens OX=9606 GN=PPIA PE=1 SV=2	MC(BTD[C])QGGDFTR PGFMC(BTD[C])QGGDFTR|MC(BTD[C])QGGDFTR PGFMC(BTD[C])QGGDFTR IPGFMC(BTD[C])QGGDFTR	8|5	2.235|2.48	2.3575	0.17324	13	2
138	Q5H9R7	216	PPP6R3	PP6R3_HUMAN Serine/threonine-protein phosphatase 6 regulatory subunit 3 OS=Homo sapiens OX=9606 GN=PPP6R3 PE=1 SV=2	HSNASQSLC(BTD[C])EIVR|	1|	2.34|	2.34	NA	1	1
139	Q9HDC9	409	APMAP	APMAP_HUMAN Adipocyte plasma membrane-associated protein OS=Homo sapiens OX=9606 GN=APMAP PE=1 SV=2	|SPFLC(BTD[C])R	|2	|2.34	2.34	NA	2	1
140	P63220	17	RPS21	RS21_HUMAN 40S ribosomal protein S21 OS=Homo sapiens OX=9606 GN=RPS21 PE=1 SV=1	C(BTD[C])SASNR KC(BTD[C])SASNR|KC(BTD[C])SASNR	3|4	2.33|2.34	2.335	0.00707	7	2
141	P14618	326	PKM	KPYM_HUMAN Pyruvate kinase PKM OS=Homo sapiens OX=9606 GN=PKM PE=1 SV=4	AGKPVIC(BTD[C])ATQMLESMIK PVIC(BTD[C])ATQMLESMIK|AGKPVIC(BTD[C])ATQMLESMIK PVIC(BTD[C])ATQMLESMIK	21|9	2.42|2.24	2.33	0.12728	30	2
142	Q8N163	515	CCAR2	CCAR2_HUMAN Cell cycle and apoptosis regulator protein 2 OS=Homo sapiens OX=9606 GN=CCAR2 PE=1 SV=2	PGC(BTD[C])VNLSLHGIVEDR|	1|	2.32|	2.32	NA	1	1
143	P16152	150	CBR1	CBR1_HUMAN Carbonyl reductase [NADPH] 1 OS=Homo sapiens OX=9606 GN=CBR1 PE=1 SV=3	|SC(BTD[C])SPELQQK	|2	|2.295	2.295	NA	2	1
144	P09382	17	LGALS1	LEG1_HUMAN Galectin-1 OS=Homo sapiens OX=9606 GN=LGALS1 PE=1 SV=2	KPGEC(BTD[C])LR LKPGEC(BTD[C])LR ASNLNLKPGEC(BTD[C])LR LNLKPGEC(BTD[C])LR VASNLNLKPGEC(BTD[C])LR|KPGEC(BTD[C])LR LKPGEC(BTD[C])LR NLKPGEC(BTD[C])LR	6|5	2.035|2.55	2.2925	0.36416	11	2
145	P52209	30	PGD	6PGD_HUMAN 6-phosphogluconate dehydrogenase, decarboxylating OS=Homo sapiens OX=9606 GN=PGD PE=1 SV=3	|NDHGFVVC(BTD[C])AFNR	|1	|2.29	2.29	NA	1	1
146	P62249	25	RPS16	RS16_HUMAN 40S ribosomal protein S16 OS=Homo sapiens OX=9606 GN=RPS16 PE=1 SV=2	ATAVAHC(BTD[C])K|AVAHC(BTD[C])K ATAVAHC(BTD[C])K	2|4	2.585|1.985	2.285	0.42426	6	2
147	P23919	31	DTYMK	KTHY_HUMAN Thymidylate kinase OS=Homo sapiens OX=9606 GN=DTYMK PE=1 SV=4	LC(BTD[C])AAGHR|	2|	2.28|	2.28	NA	2	1
148	P07814	1377	EPRS	SYEP_HUMAN Bifunctional glutamate/proline--tRNA ligase OS=Homo sapiens OX=9606 GN=EPRS PE=1 SV=5	SC(BTD[C])QFVAVR|	1|	2.28|	2.28	NA	1	1
149	Q13838	165	DDX39B	DX39B_HUMAN Spliceosome RNA helicase DDX39B OS=Homo sapiens OX=9606 GN=DDX39B PE=1 SV=1	|NC(BTD[C])PHIVVGTPGR	|2	|2.28	2.28	NA	2	1
150	P23396	97	RPS3	RS3_HUMAN 40S ribosomal protein S3 OS=Homo sapiens OX=9606 GN=RPS3 PE=1 SV=2	|GLC(BTD[C])AIAQAESLR	|1	|2.28	2.28	NA	1	1
151	Q06203	207	PPAT	PUR1_HUMAN Amidophosphoribosyltransferase OS=Homo sapiens OX=9606 GN=PPAT PE=1 SV=1	|DPYGNRPLC(BTD[C])IGR	|1	|2.27	2.27	NA	1	1
152	Q9NZB2	14	FAM120A	F120A_HUMAN Constitutive coactivator of PPAR-gamma-like protein 1 OS=Homo sapiens OX=9606 GN=FAM120A PE=1 SV=2	HC(BTD[C])PSAVVPVELQK|HC(BTD[C])PSAVVPVELQK	1|2	2.12|2.405	2.2625	0.20153	3	2
153	O43143	750	DHX15	DHX15_HUMAN Pre-mRNA-splicing factor ATP-dependent RNA helicase DHX15 OS=Homo sapiens OX=9606 GN=DHX15 PE=1 SV=2	TC(BTD[C])TDIKPEWLVK|TC(BTD[C])TDIKPEWLVK	1|1	1.58|2.94	2.26	0.96167	2	2
154	Q9NP79	38	VTA1	VTA1_HUMAN Vacuolar protein sorting-associated protein VTA1 homolog OS=Homo sapiens OX=9606 GN=VTA1 PE=1 SV=1	DPVVAYYC(BTD[C])R|	2|	2.25|	2.25	NA	2	1
155	Q01813	718	PFKP	PFKAP_HUMAN ATP-dependent 6-phosphofructokinase, platelet type OS=Homo sapiens OX=9606 GN=PFKP PE=1 SV=2	FTTDDSIC(BTD[C])VLGISK|FTTDDSIC(BTD[C])VLGISK	2|1	2.31|2.14	2.225	0.12021	3	2
156	P60660	32	MYL6	MYL6_HUMAN Myosin light polypeptide 6 OS=Homo sapiens OX=9606 GN=MYL6 PE=1 SV=2	SQC(BTD[C])GDVMR|SQC(BTD[C])GDVMR	3|1	2.31|2.13	2.22	0.12728	4	2
157	Q12931	261	TRAP1	TRAP1_HUMAN Heat shock protein 75 kDa, mitochondrial OS=Homo sapiens OX=9606 GN=TRAP1 PE=1 SV=3	SDC(BTD[C])KEFSSEAR|	1|	2.22|	2.22	NA	1	1
158	Q9BWD1	360	ACAT2	THIC_HUMAN Acetyl-CoA acetyltransferase, cytosolic OS=Homo sapiens OX=9606 GN=ACAT2 PE=1 SV=2	|VNIEGGAIALGHPLGASGC(BTD[C])R	|1	|2.22	2.22	NA	1	1
159	Q96AE4	132	FUBP1	FUBP1_HUMAN Far upstream element-binding protein 1 OS=Homo sapiens OX=9606 GN=FUBP1 PE=1 SV=3	IQQESGC(BTD[C])K|	1|	2.21|	2.21	NA	1	1
160	P07814	697	EPRS	SYEP_HUMAN Bifunctional glutamate/proline--tRNA ligase OS=Homo sapiens OX=9606 GN=EPRS PE=1 SV=5	EAPC(BTD[C])VLIYIPDGHTK|	1|	2.21|	2.21	NA	1	1
161	P30050	162	RPL12	RL12_HUMAN 60S ribosomal protein L12 OS=Homo sapiens OX=9606 GN=RPL12 PE=1 SV=1	HPHDIIDDINSGAVEC(BTD[C])PAS|HPHDIIDDINSGAVEC(BTD[C])PAS	1|2	2.56|1.85	2.205	0.50205	3	2
162	P48556	112	PSMD8	PSMD8_HUMAN 26S proteasome non-ATPase regulatory subunit 8 OS=Homo sapiens OX=9606 GN=PSMD8 PE=1 SV=2	|SPNLSKC(BTD[C])GEELGR	|1	|2.2	2.2	NA	1	1
163	P04406	156	GAPDH	G3P_HUMAN Glyceraldehyde-3-phosphate dehydrogenase OS=Homo sapiens OX=9606 GN=GAPDH PE=1 SV=3	|IISNASCTTNC(BTD[C])LAPLAK	|3	|2.2	2.2	NA	3	1
164	Q00610	736	CLTC	CLH1_HUMAN Clathrin heavy chain 1 OS=Homo sapiens OX=9606 GN=CLTC PE=1 SV=5	YIQAAC(BTD[C])K|YIQAAC(BTD[C])K	1|1	2.33|2.03	2.18	0.21213	2	2
165	P09651	43	HNRNPA1	ROA1_HUMAN Heterogeneous nuclear ribonucleoprotein A1 OS=Homo sapiens OX=9606 GN=HNRNPA1 PE=1 SV=5	|GTLTDC(BTD[C])VVMR	|1	|2.18	2.18	NA	1	1
166	Q96EP5	63	DAZAP1	DAZP1_HUMAN DAZ-associated protein 1 OS=Homo sapiens OX=9606 GN=DAZAP1 PE=1 SV=1	FKDPNC(BTD[C])VGTVLASR|	1|	2.17|	2.17	NA	1	1
167	P13861	128	PRKAR2A	KAP2_HUMAN cAMP-dependent protein kinase type II-alpha regulatory subunit OS=Homo sapiens OX=9606 GN=PRKAR2A PE=1 SV=2	TDEQRC(BTD[C])R|	1|	2.17|	2.17	NA	1	1
168	P62701	181	RPS4X	RS4X_HUMAN 40S ribosomal protein S4, X isoform OS=Homo sapiens OX=9606 GN=RPS4X PE=1 SV=2	|FDTGNLC(BTD[C])MVTGGANLGR	|1	|2.17	2.17	NA	1	1
169	O95793	523	STAU1	STAU1_HUMAN Double-stranded RNA-binding protein Staufen homolog 1 OS=Homo sapiens OX=9606 GN=STAU1 PE=1 SV=2	|NEFVSLINC(BTD[C])SSQPPLISHGIGK	|1	|2.15	2.15	NA	1	1
170	Q99832	158	CCT7	TCPH_HUMAN T-complex protein 1 subunit eta OS=Homo sapiens OX=9606 GN=CCT7 PE=1 SV=2	LLEKC(BTD[C])AMTALSSK|LLEKC(BTD[C])AMTALSSK	5|2	2.23|2.05	2.14	0.12728	7	2
171	Q96SI9	195	STRBP	STRBP_HUMAN Spermatid perinuclear RNA-binding protein OS=Homo sapiens OX=9606 GN=STRBP PE=1 SV=1	QKC(BTD[C])LNALASLR|	1|	2.14|	2.14	NA	1	1
172	Q2VIR3	269	EIF2S3B	IF2GL_HUMAN Eukaryotic translation initiation factor 2 subunit 3B OS=Homo sapiens OX=9606 GN=EIF2S3B PE=2 SV=2	SFDVNKPGC(BTD[C])EVDDLKGGVAGGSILK|SFDVNKPGC(BTD[C])EVDDLKGGVAGGSILK	1|1	1.62|2.62	2.12	0.70711	2	2
173	P30041	47	PRDX6	PRDX6_HUMAN Peroxiredoxin-6 OS=Homo sapiens OX=9606 GN=PRDX6 PE=1 SV=3	FTPVC(BTD[C])TTELGR|TPVC(BTD[C])TTELGR FTPVC(BTD[C])TTELGR	1|4	1.86|2.38	2.12	0.3677	5	2	Active site
174	P40227	282	CCT6A	TCPZ_HUMAN T-complex protein 1 subunit zeta OS=Homo sapiens OX=9606 GN=CCT6A PE=1 SV=3	|KVC(BTD[C])GDSDK	|4	|2.11	2.11	NA	4	1
175	Q16851	276	UGP2	UGPA_HUMAN UTP--glucose-1-phosphate uridylyltransferase OS=Homo sapiens OX=9606 GN=UGP2 PE=1 SV=5	RC(BTD[C])EFVMEVTNK|RC(BTD[C])EFVMEVTNK	2|1	1.12|3.09	2.105	1.393	3	2
176	O00410	110	IPO5	IPO5_HUMAN Importin-5 OS=Homo sapiens OX=9606 GN=IPO5 PE=1 SV=4	KVC(BTD[C])DIAAELAR VC(BTD[C])DIAAELAR|KVC(BTD[C])DIAAELAR VC(BTD[C])DIAAELAR	2|4	2.11|2.095	2.1025	0.01061	6	2
177	P46060	152	RANGAP1	RAGP1_HUMAN Ran GTPase-activating protein 1 OS=Homo sapiens OX=9606 GN=RANGAP1 PE=1 SV=1	LNNC(BTD[C])GMGIGGGK|	1|	2.1|	2.1	NA	1	1
178	P31689	302	DNAJA1	DNJA1_HUMAN DnaJ homolog subfamily A member 1 OS=Homo sapiens OX=9606 GN=DNAJA1 PE=1 SV=2	HGDIKC(BTD[C])VLNEGMPIYR|HGDIKC(BTD[C])VLNEGMPIYR	1|1	2.02|2.17	2.095	0.10607	2	2
179	Q12906	203	ILF3	ILF3_HUMAN Interleukin enhancer-binding factor 3 OS=Homo sapiens OX=9606 GN=ILF3 PE=1 SV=3	QKC(BTD[C])LAALASLR|QKC(BTD[C])LAALASLR	1|3	2.38|1.81	2.095	0.40305	4	2
180	Q8IY17	991	PNPLA6	PLPL6_HUMAN Neuropathy target esterase OS=Homo sapiens OX=9606 GN=PNPLA6 PE=1 SV=3	GC(BTD[C])SHIGVLK|	1|	2.09|	2.09	NA	1	1
181	P13797	463	PLS3	PLST_HUMAN Plastin-3 OS=Homo sapiens OX=9606 GN=PLS3 PE=1 SV=4	|KIENC(BTD[C])NYAVELGK	|1	|2.08	2.08	NA	1	1
182	P07738	145	BPGM	PMGE_HUMAN Bisphosphoglycerate mutase OS=Homo sapiens OX=9606 GN=BPGM PE=1 SV=2	YKVC(BTD[C])DVPLDQLPR|	1|	2.07|	2.07	NA	1	1
183	P09936	220	UCHL1	UCHL1_HUMAN Ubiquitin carboxyl-terminal hydrolase isozyme L1 OS=Homo sapiens OX=9606 GN=UCHL1 PE=1 SV=2	FSAVALC(BTD[C])K|	2|	2.06|	2.06	NA	2	1
184	O14929	27	HAT1	HAT1_HUMAN Histone acetyltransferase type B catalytic subunit OS=Homo sapiens OX=9606 GN=HAT1 PE=1 SV=1	LAEYKC(BTD[C])NTNTAIELK|	1|	2.05|	2.05	NA	1	1
185	P05198	98	EIF2S1	IF2A_HUMAN Eukaryotic translation initiation factor 2 subunit 1 OS=Homo sapiens OX=9606 GN=EIF2S1 PE=1 SV=3	VSPEEAIKC(BTD[C])EDK|VSPEEAIKC(BTD[C])EDK	1|2	2.04|2.05	2.045	0.00707	3	2
186	Q9BQA1	172	WDR77	MEP50_HUMAN Methylosome protein 50 OS=Homo sapiens OX=9606 GN=WDR77 PE=1 SV=1	AHAAQVTC(BTD[C])VAASPHK|	1|	2.04|	2.04	NA	1	1
187	P31321	347	PRKAR1B	KAP1_HUMAN cAMP-dependent protein kinase type I-beta regulatory subunit OS=Homo sapiens OX=9606 GN=PRKAR1B PE=1 SV=4	GPLKC(BTD[C])VK|GPLKC(BTD[C])VK	4|4	2.125|1.95	2.0375	0.12374	8	2
188	Q8TBC4	249	UBA3	UBA3_HUMAN NEDD8-activating enzyme E1 catalytic subunit OS=Homo sapiens OX=9606 GN=UBA3 PE=1 SV=2	LPEHC(BTD[C])IEYVR|LPEHC(BTD[C])IEYVR	1|1	2.12|1.95	2.035	0.12021	2	2
189	P22234	266	PAICS	PUR6_HUMAN Multifunctional protein ADE2 OS=Homo sapiens OX=9606 GN=PAICS PE=1 SV=3	SESQC(BTD[C])R|	1|	2.03|	2.03	NA	1	1
190	P61981	112	YWHAG	1433G_HUMAN 14-3-3 protein gamma OS=Homo sapiens OX=9606 GN=YWHAG PE=1 SV=2	NC(BTD[C])SETQYESK|	1|	2.03|	2.03	NA	1	1
191	Q9Y5X1	427	SNX9	SNX9_HUMAN Sorting nexin-9 OS=Homo sapiens OX=9606 GN=SNX9 PE=1 SV=1	RC(BTD[C])TGPLPK|	1|	2.03|	2.03	NA	1	1
192	P09622	85	DLD	DLDH_HUMAN Dihydrolipoyl dehydrogenase, mitochondrial OS=Homo sapiens OX=9606 GN=DLD PE=1 SV=2	NETLGGTCLNVGC(BTD[C])IPSK|	1|	2.03|	2.03	NA	1	1	Disulfide bond
193	P61106	26	RAB14	RAB14_HUMAN Ras-related protein Rab-14 OS=Homo sapiens OX=9606 GN=RAB14 PE=1 SV=4	SC(BTD[C])LLHQFTEK|	1|	2.02|	2.02	NA	1	1
194	Q9BXJ9	309	NAA15	NAA15_HUMAN N-alpha-acetyltransferase 15, NatA auxiliary subunit OS=Homo sapiens OX=9606 GN=NAA15 PE=1 SV=1	|FKEC(BTD[C])LDK	|3	|2.02	2.02	NA	3	1
195	P62879	25	GNB2	GBB2_HUMAN Guanine nucleotide-binding protein G(I)/G(S)/G(T) subunit beta-2 OS=Homo sapiens OX=9606 GN=GNB2 PE=1 SV=3	|KAC(BTD[C])GDSTLTQITAGLDPVGR	|1	|2.02	2.02	NA	1	1
196	P12270	1068	TPR	TPR_HUMAN Nucleoprotein TPR OS=Homo sapiens OX=9606 GN=TPR PE=1 SV=3	RDC(BTD[C])QEQAK|RDC(BTD[C])QEQAK	3|2	2.35|1.685	2.0175	0.47023	5	2
197	Q9NZM1	1402	MYOF	MYOF_HUMAN Myoferlin OS=Homo sapiens OX=9606 GN=MYOF PE=1 SV=1	FRC(BTD[C])DPYAGK|FRC(BTD[C])DPYAGK	3|4	1.93|2.09	2.01	0.11314	7	2
198	Q9NSE4	883	IARS2	SYIM_HUMAN Isoleucine--tRNA ligase, mitochondrial OS=Homo sapiens OX=9606 GN=IARS2 PE=1 SV=2	KPGLEEAVESAC(BTD[C])AMR|	1|	2.0|	2	NA	1	1
199	P13693	28	TPT1	TCTP_HUMAN Translationally-controlled tumor protein OS=Homo sapiens OX=9606 GN=TPT1 PE=1 SV=1	IADGLC(BTD[C])LEVEGK|	1|	1.99|	1.99	NA	1	1
200	P29401	133	TKT	TKT_HUMAN Transketolase OS=Homo sapiens OX=9606 GN=TKT PE=1 SV=3	QAFTDVATGSLGQGLGAAC(BTD[C])GMAYTGK|	1|	1.99|	1.99	NA	1	1
201	Q09028	167	RBBP4	RBBP4_HUMAN Histone-binding protein RBBP4 OS=Homo sapiens OX=9606 GN=RBBP4 PE=1 SV=3	HPSKPDPSGEC(BTD[C])NPDLR|	2|	1.965|	1.965	NA	2	1
202	P56537	63	EIF6	IF6_HUMAN Eukaryotic translation initiation factor 6 OS=Homo sapiens OX=9606 GN=EIF6 PE=1 SV=1	MC(BTD[C])VGNR|	1|	1.96|	1.96	NA	1	1
203	P09543	252	CNP	CN37_HUMAN 2',3'-cyclic-nucleotide 3'-phosphodiesterase OS=Homo sapiens OX=9606 GN=CNP PE=1 SV=2	PPGVLHC(BTD[C])TTK|PPGVLHC(BTD[C])TTK	2|1	1.82|2.09	1.955	0.19092	3	2
204	P61421	326	ATP6V0D1	VA0D1_HUMAN V-type proton ATPase subunit d 1 OS=Homo sapiens OX=9606 GN=ATP6V0D1 PE=1 SV=1	LKEQEC(BTD[C])R|	1|	1.95|	1.95	NA	1	1
205	P12955	183	PEPD	PEPD_HUMAN Xaa-Pro dipeptidase OS=Homo sapiens OX=9606 GN=PEPD PE=1 SV=3	|FEVNNTILHPEIVEC(BTD[C])R	|1	|1.95	1.95	NA	1	1
206	P63167	56	DYNLL1	DYL1_HUMAN Dynein light chain 1, cytoplasmic OS=Homo sapiens OX=9606 GN=DYNLL1 PE=1 SV=1	PTWHC(BTD[C])IVGR YNPTWHC(BTD[C])IVGR|HC(BTD[C])IVGR NPTWHC(BTD[C])IVGR	3|2	2.26|1.635	1.9475	0.44194	5	2
207	Q99436	74	PSMB7	PSB7_HUMAN Proteasome subunit beta type-7 OS=Homo sapiens OX=9606 GN=PSMB7 PE=1 SV=1	ATEGMVVADKNC(BTD[C])SK|ATEGMVVADKNC(BTD[C])SK	3|1	1.76|2.13	1.945	0.26163	4	2
208	P00338	131	LDHA	LDHA_HUMAN L-lactate dehydrogenase A chain OS=Homo sapiens OX=9606 GN=LDHA PE=1 SV=2	YSPNC(BTD[C])K|YSPNC(BTD[C])K	9|7	2.05|1.84	1.945	0.14849	16	2
209	P67936	154	TPM4	TPM4_HUMAN Tropomyosin alpha-4 chain OS=Homo sapiens OX=9606 GN=TPM4 PE=1 SV=3	AEVSELKC(BTD[C])GDLEEELK|AEVSELKC(BTD[C])GDLEEELK	1|1	1.94|1.95	1.945	0.00707	2	2
210	Q15185	40	PTGES3	TEBP_HUMAN Prostaglandin E synthase 3 OS=Homo sapiens OX=9606 GN=PTGES3 PE=1 SV=1	SC(BTD[C])LGGSDNFK|SC(BTD[C])LGGSDNFK	2|2	1.82|2.06	1.94	0.16971	4	2
211	P34932	779	HSPA4	HSP74_HUMAN Heat shock 70 kDa protein 4 OS=Homo sapiens OX=9606 GN=HSPA4 PE=1 SV=4	ELTSTC(BTD[C])SPIISKPK|	1|	1.93|	1.93	NA	1	1
212	P10809	237	HSPD1	CH60_HUMAN 60 kDa heat shock protein, mitochondrial OS=Homo sapiens OX=9606 GN=HSPD1 PE=1 SV=2	|GQKC(BTD[C])EFQDAYVLLSEK	|1	|1.93	1.93	NA	1	1
213	Q13867	164	BLMH	BLMH_HUMAN Bleomycin hydrolase OS=Homo sapiens OX=9606 GN=BLMH PE=1 SV=1	KC(BTD[C])FPESYTTEATR|KC(BTD[C])FPESYTTEATR	1|2	2.06|1.795	1.9275	0.18738	3	2
214	Q9H8S9	109	MOB1A	MOB1A_HUMAN MOB kinase activator 1A OS=Homo sapiens OX=9606 GN=MOB1A PE=1 SV=4	KPIKC(BTD[C])SAPK|PIKC(BTD[C])SAPK	2|1	2.39|1.46	1.925	0.65761	3	2
215	Q00341	960	HDLBP	VIGLN_HUMAN Vigilin OS=Homo sapiens OX=9606 GN=HDLBP PE=1 SV=2	KEKC(BTD[C])EAAK EKC(BTD[C])EAAK|	2|	1.92|	1.92	NA	2	1
216	P27348	25	YWHAQ	1433T_HUMAN 14-3-3 protein theta OS=Homo sapiens OX=9606 GN=YWHAQ PE=1 SV=1	MATC(BTD[C])MK|	2|	1.91|	1.91	NA	2	1
217	Q12965	1056	MYO1E	MYO1E_HUMAN Unconventional myosin-Ie OS=Homo sapiens OX=9606 GN=MYO1E PE=1 SV=2	PKPQVPQC(BTD[C])K|	3|	1.91|	1.91	NA	3	1
218	P18206	313	VCL	VINC_HUMAN Vinculin OS=Homo sapiens OX=9606 GN=VCL PE=1 SV=4	VGELC(BTD[C])AGK|	2|	1.91|	1.91	NA	2	1
219	P09960	543	LTA4H	LKHA4_HUMAN Leukotriene A-4 hydrolase OS=Homo sapiens OX=9606 GN=LTA4H PE=1 SV=2	|LC(BTD[C])IQSK	|1	|1.91	1.91	NA	1	1
220	Q99497	46	PARK7	PARK7_HUMAN Protein/nucleic acid deglycase DJ-1 OS=Homo sapiens OX=9606 GN=PARK7 PE=1 SV=2	LAGKDPVQC(BTD[C])SR DPVQC(BTD[C])SR TVAGLAGKDPVQC(BTD[C])SR|DPVQC(BTD[C])SR VTVAGLAGKDPVQC(BTD[C])SR	3|3	1.9|1.91	1.905	0.00707	6	2
221	P43304	285	GPD2	GPDM_HUMAN Glycerol-3-phosphate dehydrogenase, mitochondrial OS=Homo sapiens OX=9606 GN=GPD2 PE=1 SV=3	AKC(BTD[C])VINATGPFTDSVR|	1|	1.9|	1.9	NA	1	1
222	P62140	21	PPP1CB	PP1B_HUMAN Serine/threonine-protein phosphatase PP1-beta catalytic subunit OS=Homo sapiens OX=9606 GN=PPP1CB PE=1 SV=3	GC(BTD[C])RPGK|	2|	1.9|	1.9	NA	2	1
223	Q9NZM1	1131	MYOF	MYOF_HUMAN Myoferlin OS=Homo sapiens OX=9606 GN=MYOF PE=1 SV=1	|HSATTVFGANTPIVSC(BTD[C])NFDR	|1	|1.9	1.9	NA	1	1
224	Q03154	49	ACY1	ACY1_HUMAN Aminoacylase-1 OS=Homo sapiens OX=9606 GN=ACY1 PE=1 SV=1	|LGLGC(BTD[C])QK	|2	|1.895	1.895	NA	2	1
225	P14618	31	PKM	KPYM_HUMAN Pyruvate kinase PKM OS=Homo sapiens OX=9606 GN=PKM PE=1 SV=4	LEHMC(BTD[C])R ADTFLEHMC(BTD[C])R AAMADTFLEHMC(BTD[C])R FLEHMC(BTD[C])R DTFLEHMC(BTD[C])R|LEHMC(BTD[C])R ADTFLEHMC(BTD[C])R DTFLEHMC(BTD[C])R FLEHMC(BTD[C])R AAMADTFLEHMC(BTD[C])R	18|22	2.025|1.745	1.885	0.19799	40	2
226	P08670	328	VIM	VIME_HUMAN Vimentin OS=Homo sapiens OX=9606 GN=VIM PE=1 SV=4	QVQSLTC(BTD[C])EVDALK|QVQSLTC(BTD[C])EVDALK	3|2	2.29|1.48	1.885	0.57276	5	2
227	P21333	2601	FLNA	FLNA_HUMAN Filamin-A OS=Homo sapiens OX=9606 GN=FLNA PE=1 SV=4	TPC(BTD[C])EEILVK|TPC(BTD[C])EEILVK	2|1	1.835|1.92	1.8775	0.0601	3	2
228	P32969	134	RPL9	RL9_HUMAN 60S ribosomal protein L9 OS=Homo sapiens OX=9606 GN=RPL9 PE=1 SV=1	MRPGVAC(BTD[C])SVSQAQK|MRPGVAC(BTD[C])SVSQAQK	8|5	1.82|1.92	1.87	0.07071	13	2
229	P31948	339	STIP1	STIP1_HUMAN Stress-induced-phosphoprotein 1 OS=Homo sapiens OX=9606 GN=STIP1 PE=1 SV=1	KC(BTD[C])QQAEK|KC(BTD[C])QQAEK	1|1	1.92|1.82	1.87	0.07071	2	2
230	P52209	171	PGD	6PGD_HUMAN 6-phosphogluconate dehydrogenase, decarboxylating OS=Homo sapiens OX=9606 GN=PGD PE=1 SV=3	|VGTGEPCC(BTD[C])DWVGDEGAGHFVK	|1	|1.87	1.87	NA	1	1
231	P15531	109	NME1	NDKA_HUMAN Nucleoside diphosphate kinase A OS=Homo sapiens OX=9606 GN=NME1 PE=1 SV=1	|GDFC(BTD[C])IQVGR	|3	|1.87	1.87	NA	3	1
232	P61247	96	RPS3A	RS3A_HUMAN 40S ribosomal protein S3a OS=Homo sapiens OX=9606 GN=RPS3A PE=1 SV=2	NC(BTD[C])LTNFHGMDLTR|NC(BTD[C])LTNFHGMDLTR	1|3	1.76|1.97	1.865	0.14849	4	2
233	P35579	931	MYH9	MYH9_HUMAN Myosin-9 OS=Homo sapiens OX=9606 GN=MYH9 PE=1 SV=4	VEEEEERC(BTD[C])QHLQAEK|VEEEEERC(BTD[C])QHLQAEK	1|2	1.9|1.825	1.8625	0.05303	3	2
234	P35579	816	MYH9	MYH9_HUMAN Myosin-9 OS=Homo sapiens OX=9606 GN=MYH9 PE=1 SV=4	NC(BTD[C])AAYLK|	2|	1.86|	1.86	NA	2	1
235	Q8TEX9	782	IPO4	IPO4_HUMAN Importin-4 OS=Homo sapiens OX=9606 GN=IPO4 PE=1 SV=2	SC(BTD[C])GTLTLKPPGR|SC(BTD[C])GTLTLKPPGR	4|1	1.72|2.0	1.86	0.19799	5	2
236	P31942	27	HNRNPH3	HNRH3_HUMAN Heterogeneous nuclear ribonucleoprotein H3 OS=Homo sapiens OX=9606 GN=HNRNPH3 PE=1 SV=2	|LPFGC(BTD[C])SK GLPFGC(BTD[C])SK	|3	|1.86	1.86	NA	3	1
237	Q9Y315	118	DERA	DEOC_HUMAN Deoxyribose-phosphate aldolase OS=Homo sapiens OX=9606 GN=DERA PE=1 SV=2	|AAGC(BTD[C])NIPVASVAAGFPAGQTHLK	|1	|1.86	1.86	NA	1	1
238	Q14152	78	EIF3A	EIF3A_HUMAN Eukaryotic translation initiation factor 3 subunit A OS=Homo sapiens OX=9606 GN=EIF3A PE=1 SV=1	NIC(BTD[C])QQVNIK|NIC(BTD[C])QQVNIK	2|1	1.81|1.88	1.845	0.0495	3	2
239	Q6PD62	363	CTR9	CTR9_HUMAN RNA polymerase-associated protein CTR9 homolog OS=Homo sapiens OX=9606 GN=CTR9 PE=1 SV=1	GDKENASQC(BTD[C])FEK|	1|	1.83|	1.83	NA	1	1
240	P05388	119	RPLP0	RLA0_HUMAN 60S acidic ribosomal protein P0 OS=Homo sapiens OX=9606 GN=RPLP0 PE=1 SV=1	|AGAIAPC(BTD[C])EVTVPAQNTGLGPEK	|1	|1.83	1.83	NA	1	1
241	Q8TBC4	139	UBA3	UBA3_HUMAN NEDD8-activating enzyme E1 catalytic subunit OS=Homo sapiens OX=9606 GN=UBA3 PE=1 SV=2	VPNC(BTD[C])NVVPHFNK|VPNC(BTD[C])NVVPHFNK	2|1	1.215|2.44	1.8275	0.86621	3	2
242	Q15058	291	KIF14	KIF14_HUMAN Kinesin-like protein KIF14 OS=Homo sapiens OX=9606 GN=KIF14 PE=1 SV=1	C(BTD[C])SLPQLK|	1|	1.82|	1.82	NA	1	1
243	Q07157	1700	TJP1	ZO1_HUMAN Tight junction protein ZO-1 OS=Homo sapiens OX=9606 GN=TJP1 PE=1 SV=3	|GETLLSPLVMC(BTD[C])GPHGLK	|1	|1.81	1.81	NA	1	1
244	P62241	182	RPS8	RS8_HUMAN 40S ribosomal protein S8 OS=Homo sapiens OX=9606 GN=RPS8 PE=1 SV=2	PGQC(BTD[C])GR|	2|	1.8|	1.8	NA	2	1
245	P55769	102	SNU13	NH2L1_HUMAN NHP2-like protein 1 OS=Homo sapiens OX=9606 GN=SNU13 PE=1 SV=3	PVIAC(BTD[C])SVTIK|	2|	1.8|	1.8	NA	2	1
246	O43390	226	HNRNPR	HNRPR_HUMAN Heterogeneous nuclear ribonucleoprotein R OS=Homo sapiens OX=9606 GN=HNRNPR PE=1 SV=1	|LC(BTD[C])DSYEIRPGK	|3	|1.8	1.8	NA	3	1
247	Q14CX7	365	NAA25	NAA25_HUMAN N-alpha-acetyltransferase 25, NatB auxiliary subunit OS=Homo sapiens OX=9606 GN=NAA25 PE=1 SV=1	|FGDKPCC(BTD[C])FTDLK	|3	|1.8	1.8	NA	3	1
248	P07737	71	PFN1	PROF1_HUMAN Profilin-1 OS=Homo sapiens OX=9606 GN=PFN1 PE=1 SV=2	YVNGLTLGGQKC(BTD[C])SVIR|YVNGLTLGGQKC(BTD[C])SVIR	1|1	1.51|2.08	1.795	0.40305	2	2
249	Q9NX02	783	NLRP2	NALP2_HUMAN NACHT, LRR and PYD domains-containing protein 2 OS=Homo sapiens OX=9606 GN=NLRP2 PE=1 SV=1	HPEC(BTD[C])NLR|	1|	1.79|	1.79	NA	1	1
250	O75600	106	GCAT	KBL_HUMAN 2-amino-3-ketobutyrate coenzyme A ligase, mitochondrial OS=Homo sapiens OX=9606 GN=GCAT PE=1 SV=1	FIC(BTD[C])GTQSIHK|FIC(BTD[C])GTQSIHK	1|1	1.04|2.54	1.79	1.06066	2	2
251	P18206	1040	VCL	VINC_HUMAN Vinculin OS=Homo sapiens OX=9606 GN=VCL PE=1 SV=4	QC(BTD[C])TDKR|QC(BTD[C])TDKR	1|1	1.81|1.77	1.79	0.02828	2	2
252	Q9H832	263	UBE2Z	UBE2Z_HUMAN Ubiquitin-conjugating enzyme E2 Z OS=Homo sapiens OX=9606 GN=UBE2Z PE=1 SV=2	CPC(BTD[C])PEPLR|CPC(BTD[C])PEPLR	4|1	1.9|1.66	1.78	0.16971	5	2
253	Q16719	45	KYNU	KYNU_HUMAN Kynureninase OS=Homo sapiens OX=9606 GN=KYNU PE=1 SV=1	FREC(BTD[C])FYIPK|REC(BTD[C])FYIPK	1|1	1.31|2.25	1.78	0.66468	2	2
254	P17812	30	CTPS1	PYRG1_HUMAN CTP synthase 1 OS=Homo sapiens OX=9606 GN=CTPS1 PE=1 SV=2	SC(BTD[C])GLHVTSIK|SC(BTD[C])GLHVTSIK	2|2	1.825|1.705	1.765	0.08485	4	2
255	Q15041	109	ARL6IP1	AR6P1_HUMAN ADP-ribosylation factor-like protein 6-interacting protein 1 OS=Homo sapiens OX=9606 GN=ARL6IP1 PE=1 SV=2	FHEIC(BTD[C])SNLVK|	2|	1.76|	1.76	NA	2	1
256	Q8NC51	11	SERBP1	PAIRB_HUMAN Plasminogen activator inhibitor 1 RNA-binding protein OS=Homo sapiens OX=9606 GN=SERBP1 PE=1 SV=2	PGHLQEGFGC(BTD[C])VVTNR|PGHLQEGFGC(BTD[C])VVTNR	2|1	1.805|1.7	1.7525	0.07425	3	2
257	P06733	357	ENO1	ENOA_HUMAN Alpha-enolase OS=Homo sapiens OX=9606 GN=ENO1 PE=1 SV=2	|VNQIGSVTESIQAC(BTD[C])K	|2	|1.75	1.75	NA	2	1
258	Q14847	29	LASP1	LASP1_HUMAN LIM and SH3 domain protein 1 OS=Homo sapiens OX=9606 GN=LASP1 PE=1 SV=2	AC(BTD[C])FHCETCK|AC(BTD[C])FHCETCK	2|5	1.73|1.75	1.74	0.01414	7	2
259	P60174	104	TPI1	TPIS_HUMAN Triosephosphate isomerase OS=Homo sapiens OX=9606 GN=TPI1 PE=1 SV=3	IAVAAQNC(BTD[C])YK|	2|	1.74|	1.74	NA	2	1
260	P55060	842	CSE1L	XPO2_HUMAN Exportin-2 OS=Homo sapiens OX=9606 GN=CSE1L PE=1 SV=3	|KIC(BTD[C])AVGITK	|3	|1.74	1.74	NA	3	1
261	Q9HCD5	266	NCOA5	NCOA5_HUMAN Nuclear receptor coactivator 5 OS=Homo sapiens OX=9606 GN=NCOA5 PE=1 SV=2	|SC(BTD[C])TVNIMFGTPQEHR	|1	|1.74	1.74	NA	1	1
262	P23141	274	CES1	EST1_HUMAN Liver carboxylesterase 1 OS=Homo sapiens OX=9606 GN=CES1 PE=1 SV=2	KGDVKPLAEQIAITAGC(BTD[C])K GDVKPLAEQIAITAGC(BTD[C])K|	3|	1.73|	1.73	NA	3	1	Disulfide bond
263	P26368	464	U2AF2	U2AF2_HUMAN Splicing factor U2AF 65 kDa subunit OS=Homo sapiens OX=9606 GN=U2AF2 PE=1 SV=4	YC(BTD[C])DPDSYHR|YC(BTD[C])DPDSYHR	1|1	1.84|1.61	1.725	0.16263	2	2
264	P00491	78	PNP	PNPH_HUMAN Purine nucleoside phosphorylase OS=Homo sapiens OX=9606 GN=PNP PE=1 SV=2	AC(BTD[C])VMMQGR|AC(BTD[C])VMMQGR	12|5	1.735|1.71	1.7225	0.01768	17	2
265	P53618	143	COPB1	COPB_HUMAN Coatomer subunit beta OS=Homo sapiens OX=9606 GN=COPB1 PE=1 SV=3	AC(BTD[C])LEHR|AC(BTD[C])LEHR	2|1	1.76|1.68	1.72	0.05657	3	2
266	P23526	228	AHCY	SAHH_HUMAN Adenosylhomocysteinase OS=Homo sapiens OX=9606 GN=AHCY PE=1 SV=4	GC(BTD[C])AQALR|GC(BTD[C])AQALR	1|2	1.94|1.5	1.72	0.31113	3	2
267	O14967	511	CLGN	CLGN_HUMAN Calmegin OS=Homo sapiens OX=9606 GN=CLGN PE=1 SV=1	KTDIC(BTD[C])IPQTK|	1|	1.72|	1.72	NA	1	1
268	O75369	1617	FLNB	FLNB_HUMAN Filamin-B OS=Homo sapiens OX=9606 GN=FLNB PE=1 SV=2	ATQTGDASKC(BTD[C])LATGPGIASTVK|ATQTGDASKC(BTD[C])LATGPGIASTVK	2|1	1.72|1.72	1.72	0	3	2
269	P07858	59	CTSB	CATB_HUMAN Cathepsin B OS=Homo sapiens OX=9606 GN=CTSB PE=1 SV=3	LC(BTD[C])GTFLGGPKPPQR|	1|	1.72|	1.72	NA	1	1
270	P31943	122	HNRNPH1	HNRH1_HUMAN Heterogeneous nuclear ribonucleoprotein H OS=Homo sapiens OX=9606 GN=HNRNPH1 PE=1 SV=4	GLPFGC(BTD[C])SK|	2|	1.72|	1.72	NA	2	1
271	P36578	208	RPL4	RL4_HUMAN 60S ribosomal protein L4 OS=Homo sapiens OX=9606 GN=RPL4 PE=1 SV=5	GPC(BTD[C])IIYNEDNGIIK|	2|	1.71|	1.71	NA	2	1
272	P49773	84	HINT1	HINT1_HUMAN Histidine triad nucleotide-binding protein 1 OS=Homo sapiens OX=9606 GN=HINT1 PE=1 SV=2	KC(BTD[C])AADLGLNK|KC(BTD[C])AADLGLNK	4|5	1.69|1.72	1.705	0.02121	9	2
273	P00558	316	PGK1	PGK1_HUMAN Phosphoglycerate kinase 1 OS=Homo sapiens OX=9606 GN=PGK1 PE=1 SV=3	TGQATVASGIPAGWMGLDC(BTD[C])GPESSKK TGQATVASGIPAGWMGLDC(BTD[C])GPESSK|TGQATVASGIPAGWMGLDC(BTD[C])GPESSKK	3|1	1.73|1.68	1.705	0.03536	4	2
274	Q01780	852	EXOSC10	EXOSX_HUMAN Exosome component 10 OS=Homo sapiens OX=9606 GN=EXOSC10 PE=1 SV=2	KC(BTD[C])IAAK|	1|	1.7|	1.7	NA	1	1
275	O75369	2333	FLNB	FLNB_HUMAN Filamin-B OS=Homo sapiens OX=9606 GN=FLNB PE=1 SV=2	VHSPSGAVEEC(BTD[C])HVSELEPDK|VHSPSGAVEEC(BTD[C])HVSELEPDK	1|2	1.73|1.67	1.7	0.04243	3	2
276	P54920	164	NAPA	SNAA_HUMAN Alpha-soluble NSF attachment protein OS=Homo sapiens OX=9606 GN=NAPA PE=1 SV=3	GEESNSSANKC(BTD[C])LLK|	1|	1.7|	1.7	NA	1	1
277	P43034	252	PAFAH1B1	LIS1_HUMAN Platelet-activating factor acetylhydrolase IB subunit alpha OS=Homo sapiens OX=9606 GN=PAFAH1B1 PE=1 SV=2	MVRPNQDGTLIASC(BTD[C])SNDQTVR|MVRPNQDGTLIASC(BTD[C])SNDQTVR	1|1	1.83|1.57	1.7	0.18385	2	2
278	Q9UKF6	223	CPSF3	CPSF3_HUMAN Cleavage and polyadenylation specificity factor subunit 3 OS=Homo sapiens OX=9606 GN=CPSF3 PE=1 SV=1	FC(BTD[C])NTVHDIVNR|FC(BTD[C])NTVHDIVNR	2|1	1.73|1.67	1.7	0.04243	3	2
279	P20338	28	RAB4A	RAB4A_HUMAN Ras-related protein Rab-4A OS=Homo sapiens OX=9606 GN=RAB4A PE=1 SV=3	SC(BTD[C])LLHQFIEK|SC(BTD[C])LLHQFIEK	1|1	2.85|0.55	1.7	1.62635	2	2
280	P55010	304	EIF5	IF5_HUMAN Eukaryotic translation initiation factor 5 OS=Homo sapiens OX=9606 GN=EIF5 PE=1 SV=2	FC(BTD[C])HNNK FC(BTD[C])HNNKK|	3|	1.69|	1.69	NA	3	1
281	Q9P0L0	128	VAPA	VAPA_HUMAN Vesicle-associated membrane protein-associated protein A OS=Homo sapiens OX=9606 GN=VAPA PE=1 SV=3	|LRC(BTD[C])VFEMPNENDK	|2	|1.69	1.69	NA	2	1
282	Q99426	165	TBCB	TBCB_HUMAN Tubulin-folding cofactor B OS=Homo sapiens OX=9606 GN=TBCB PE=1 SV=2	AQASSIPVGSRC(BTD[C])EVR|AQASSIPVGSRC(BTD[C])EVR	1|1	1.54|1.82	1.68	0.19799	2	2
283	P35606	56	COPB2	COPB2_HUMAN Coatomer subunit beta' OS=Homo sapiens OX=9606 GN=COPB2 PE=1 SV=2	VC(BTD[C])DLPVR|	1|	1.68|	1.68	NA	1	1
284	Q96B97	272	SH3KBP1	SH3K1_HUMAN SH3 domain-containing kinase-binding protein 1 OS=Homo sapiens OX=9606 GN=SH3KBP1 PE=1 SV=2	SKDYC(BTD[C])K|	2|	1.675|	1.675	NA	2	1
285	P63104	25	YWHAZ	1433Z_HUMAN 14-3-3 protein zeta/delta OS=Homo sapiens OX=9606 GN=YWHAZ PE=1 SV=1	YDDMAAC(BTD[C])MK MAAC(BTD[C])MK|MAAC(BTD[C])MK YDDMAAC(BTD[C])MK	8|9	1.73|1.61	1.67	0.08485	17	2
286	Q06210	638	GFPT1	GFPT1_HUMAN Glutamine--fructose-6-phosphate aminotransferase [isomerizing] 1 OS=Homo sapiens OX=9606 GN=GFPT1 PE=1 SV=3	PVVIC(BTD[C])DKEDTETIK|	1|	1.67|	1.67	NA	1	1
287	Q14980	1367	NUMA1	NUMA1_HUMAN Nuclear mitotic apparatus protein 1 OS=Homo sapiens OX=9606 GN=NUMA1 PE=1 SV=2	HLC(BTD[C])QQLQAEQAAAEK|HLC(BTD[C])QQLQAEQAAAEK	1|1	1.68|1.64	1.66	0.02828	2	2
288	P62942	23	FKBP1A	FKB1A_HUMAN Peptidyl-prolyl cis-trans isomerase FKBP1A OS=Homo sapiens OX=9606 GN=FKBP1A PE=1 SV=2	GQTC(BTD[C])VVHYTGMLEDGK GQTC(BTD[C])VVHYTGMLEDGKK TC(BTD[C])VVHYTGMLEDGK|GQTC(BTD[C])VVHYTGMLEDGKK GQTC(BTD[C])VVHYTGMLEDGK TC(BTD[C])VVHYTGMLEDGK	4|6	1.41|1.91	1.66	0.35355	10	2
289	Q08257	166	CRYZ	QOR_HUMAN Quinone oxidoreductase OS=Homo sapiens OX=9606 GN=CRYZ PE=1 SV=1	|AGESVLVHGASGGVGLAAC(BTD[C])QIAR	|1	|1.66	1.66	NA	1	1
290	P78347	745	GTF2I	GTF2I_HUMAN General transcription factor II-I OS=Homo sapiens OX=9606 GN=GTF2I PE=1 SV=2	|VENLFNEKC(BTD[C])GEALGLK	|1	|1.66	1.66	NA	1	1
291	P15880	182	RPS2	RS2_HUMAN 40S ribosomal protein S2 OS=Homo sapiens OX=9606 GN=RPS2 PE=1 SV=2	IGKPHTVPC(BTD[C])K|IGKPHTVPC(BTD[C])K	3|4	1.75|1.56	1.655	0.13435	7	2
292	P18206	325	VCL	VINC_HUMAN Vinculin OS=Homo sapiens OX=9606 GN=VCL PE=1 SV=4	REILGTC(BTD[C])K|	2|	1.65|	1.65	NA	2	1
293	Q13098	251	GPS1	CSN1_HUMAN COP9 signalosome complex subunit 1 OS=Homo sapiens OX=9606 GN=GPS1 PE=1 SV=4	LKC(BTD[C])AAGLAELAAR|	1|	1.65|	1.65	NA	1	1
294	P61247	201	RPS3A	RS3A_HUMAN 40S ribosomal protein S3a OS=Homo sapiens OX=9606 GN=RPS3A PE=1 SV=2	AC(BTD[C])QSIYPLHDVFVR|AC(BTD[C])QSIYPLHDVFVR	1|2	1.35|1.95	1.65	0.42426	3	2
295	Q5VW32	323	BROX	BROX_HUMAN BRO1 domain-containing protein BROX OS=Homo sapiens OX=9606 GN=BROX PE=1 SV=1	|NTLEKC(BTD[C])QR	|2	|1.65	1.65	NA	2	1
296	A0A0B4J2D5	176	GATD3B	GAL3B_HUMAN Glutamine amidotransferase-like class 1 domain-containing protein 3B, mitochondrial OS=Homo sapiens OX=9606 GN=GATD3B PE=1 SV=1	EFHQAGKPIGLC(BTD[C])CIAPVLAAK|EFHQAGKPIGLC(BTD[C])CIAPVLAAK	1|1	1.39|1.9	1.645	0.36062	2	2
297	Q8N8S7	62	ENAH	ENAH_HUMAN Protein enabled homolog OS=Homo sapiens OX=9606 GN=ENAH PE=1 SV=2	QDHQVVINC(BTD[C])AIPK IQDHQVVINC(BTD[C])AIPK|IQDHQVVINC(BTD[C])AIPK	2|1	1.765|1.52	1.6425	0.17324	3	2
298	O00410	972	IPO5	IPO5_HUMAN Importin-5 OS=Homo sapiens OX=9606 GN=IPO5 PE=1 SV=4	TKENVNATENC(BTD[C])ISAVGK|	1|	1.64|	1.64	NA	1	1
299	O95831	256	AIFM1	AIFM1_HUMAN Apoptosis-inducing factor 1, mitochondrial OS=Homo sapiens OX=9606 GN=AIFM1 PE=1 SV=1	LNDGSQITYEKC(BTD[C])LIATGGTPR|	1|	1.64|	1.64	NA	1	1
300	Q2TAY7	416	SMU1	SMU1_HUMAN WD40 repeat-containing protein SMU1 OS=Homo sapiens OX=9606 GN=SMU1 PE=1 SV=2	NPEHFVVC(BTD[C])NR|NPEHFVVC(BTD[C])NR	1|1	1.49|1.78	1.635	0.20506	2	2
301	Q16881	571	TXNRD1	TRXR1_HUMAN Thioredoxin reductase 1, cytoplasmic OS=Homo sapiens OX=9606 GN=TXNRD1 PE=1 SV=3	DNNKC(BTD[C])YAK|DNNKC(BTD[C])YAK	3|3	1.63|1.63	1.63	0	6	2
302	Q92841	166	DDX17	DDX17_HUMAN Probable ATP-dependent RNA helicase DDX17 OS=Homo sapiens OX=9606 GN=DDX17 PE=1 SV=2	GGDVC(BTD[C])PK|	1|	1.63|	1.63	NA	1	1
303	O75351	62	VPS4B	VPS4B_HUMAN Vacuolar protein sorting-associated protein 4B OS=Homo sapiens OX=9606 GN=VPS4B PE=1 SV=2	KC(BTD[C])TEYLDR|	1|	1.62|	1.62	NA	1	1
304	Q99497	53	PARK7	PARK7_HUMAN Protein/nucleic acid deglycase DJ-1 OS=Homo sapiens OX=9606 GN=PARK7 PE=1 SV=2	VVIC(BTD[C])PDASLEDAKK|VVIC(BTD[C])PDASLEDAKK DVVIC(BTD[C])PDASLEDAKK	2|2	1.78|1.46	1.62	0.22627	4	2
305	Q9NPH2	485	ISYNA1	INO1_HUMAN Inositol-3-phosphate synthase 1 OS=Homo sapiens OX=9606 GN=ISYNA1 PE=1 SV=1	SC(BTD[C])IENILR|SC(BTD[C])IENILR	1|1	1.64|1.6	1.62	0.02828	2	2
306	Q9H115	164	NAPB	SNAB_HUMAN Beta-soluble NSF attachment protein OS=Homo sapiens OX=9606 GN=NAPB PE=1 SV=2	|GEESNSSANKC(BTD[C])LLK	|1	|1.62	1.62	NA	1	1
307	P17844	354	DDX5	DDX5_HUMAN Probable ATP-dependent RNA helicase DDX5 OS=Homo sapiens OX=9606 GN=DDX5 PE=1 SV=1	RC(BTD[C])DELTR|RC(BTD[C])DELTR	3|1	1.61|1.6	1.605	0.00707	4	2
308	P13995	145	MTHFD2	MTDC_HUMAN Bifunctional methylenetetrahydrofolate dehydrogenase/cyclohydrolase, mitochondrial OS=Homo sapiens OX=9606 GN=MTHFD2 PE=1 SV=2	IC(BTD[C])NAVSPDKDVDGFHVINVGR|	1|	1.6|	1.6	NA	1	1
309	Q8NI60	620	COQ8A	COQ8A_HUMAN Atypical kinase COQ8A, mitochondrial OS=Homo sapiens OX=9606 GN=COQ8A PE=1 SV=1	KMGGSFLIC(BTD[C])SK|	1|	1.6|	1.6	NA	1	1
310	Q9Y490	2408	TLN1	TLN1_HUMAN Talin-1 OS=Homo sapiens OX=9606 GN=TLN1 PE=1 SV=3	MVAAATNNLC(BTD[C])EAANAAVQGHASQEK|	1|	1.59|	1.59	NA	1	1
311	P00352	186	ALDH1A1	AL1A1_HUMAN Retinal dehydrogenase 1 OS=Homo sapiens OX=9606 GN=ALDH1A1 PE=1 SV=2	IGPALSC(BTD[C])GNTVVVK IGPALSC(BTD[C])GNTVVVKPAEQTPLTALHVASLIK|	4|	1.59|	1.59	NA	4	1
312	Q16531	128	DDB1	DDB1_HUMAN DNA damage-binding protein 1 OS=Homo sapiens OX=9606 GN=DDB1 PE=1 SV=1	|IGRPSETGIIGIIDPEC(BTD[C])R	|1	|1.59	1.59	NA	1	1
313	Q9Y678	325	COPG1	COPG1_HUMAN Coatomer subunit gamma-1 OS=Homo sapiens OX=9606 GN=COPG1 PE=1 SV=1	HPSAVTAC(BTD[C])NLDLENLVTDSNR|	1|	1.58|	1.58	NA	1	1
314	O15523	296	DDX3Y	DDX3Y_HUMAN ATP-dependent RNA helicase DDX3Y OS=Homo sapiens OX=9606 GN=DDX3Y PE=1 SV=2	VRPC(BTD[C])VVYGGADIGQQIR|VRPC(BTD[C])VVYGGADIGQQIR	1|1	1.3|1.83	1.565	0.37477	2	2
315	P63279	43	UBE2I	UBC9_HUMAN SUMO-conjugating enzyme UBC9 OS=Homo sapiens OX=9606 GN=UBE2I PE=1 SV=1	NPDGTMNLMNWEC(BTD[C])AIPGKK|	1|	1.56|	1.56	NA	1	1
316	P35244	26	RPA3	RFA3_HUMAN Replication protein A 14 kDa subunit OS=Homo sapiens OX=9606 GN=RPA3 PE=1 SV=1	|IDKPVC(BTD[C])FVGR	|1	|1.56	1.56	NA	1	1
317	O75367	297	H2AFY	H2AY_HUMAN Core histone macro-H2A.1 OS=Homo sapiens OX=9606 GN=H2AFY PE=1 SV=4	NC(BTD[C])LALADDKK|NC(BTD[C])LALADDKK	5|2	1.41|1.69	1.55	0.19799	7	2
318	Q13501	44	SQSTM1	SQSTM_HUMAN Sequestosome-1 OS=Homo sapiens OX=9606 GN=SQSTM1 PE=1 SV=1	GPGPC(BTD[C])ER|	1|	1.54|	1.54	NA	1	1
319	Q99832	29	CCT7	TCPH_HUMAN T-complex protein 1 subunit eta OS=Homo sapiens OX=9606 GN=CCT7 PE=1 SV=2	AC(BTD[C])QVIAEAVR|	1|	1.54|	1.54	NA	1	1
320	Q15365	158	PCBP1	PCBP1_HUMAN Poly(rC)-binding protein 1 OS=Homo sapiens OX=9606 GN=PCBP1 PE=1 SV=2	AITIAGVPQSVTEC(BTD[C])VK|	3|	1.54|	1.54	NA	3	1
321	Q6PK04	53	CCDC137	CC137_HUMAN Coiled-coil domain-containing protein 137 OS=Homo sapiens OX=9606 GN=CCDC137 PE=1 SV=1	VNC(BTD[C])KPK|	1|	1.54|	1.54	NA	1	1
322	P04040	460	CAT	CATA_HUMAN Catalase OS=Homo sapiens OX=9606 GN=CAT PE=1 SV=3	RLC(BTD[C])ENIAGHLK LC(BTD[C])ENIAGHLK|RLC(BTD[C])ENIAGHLK LC(BTD[C])ENIAGHLK	19|13	1.53|1.54	1.535	0.00707	32	2
323	P43487	99	RANBP1	RANG_HUMAN Ran-specific GTPase-activating protein OS=Homo sapiens OX=9606 GN=RANBP1 PE=1 SV=1	IC(BTD[C])ANHYITPMMELKPNAGSDR|IC(BTD[C])ANHYITPMMELKPNAGSDR	1|1	1.6|1.47	1.535	0.09192	2	2
324	P62316	46	SNRPD2	SMD2_HUMAN Small nuclear ribonucleoprotein Sm D2 OS=Homo sapiens OX=9606 GN=SNRPD2 PE=1 SV=1	NNTQVLINC(BTD[C])R QVLINC(BTD[C])R|NNTQVLINC(BTD[C])R NTQVLINC(BTD[C])R	3|3	1.82|1.25	1.535	0.40305	6	2
325	P21399	392	ACO1	ACOC_HUMAN Cytoplasmic aconitate hydratase OS=Homo sapiens OX=9606 GN=ACO1 PE=1 SV=3	KDFESC(BTD[C])LGAK|	3|	1.53|	1.53	NA	3	1
326	O94979	60	SEC31A	SC31A_HUMAN Protein transport protein Sec31A OS=Homo sapiens OX=9606 GN=SEC31A PE=1 SV=3	SC(BTD[C])ATFSSSHR|	1|	1.52|	1.52	NA	1	1
327	P00352	50	ALDH1A1	AL1A1_HUMAN Retinal dehydrogenase 1 OS=Homo sapiens OX=9606 GN=ALDH1A1 PE=1 SV=2	C(BTD[C])QVEEGDKEDVDK PVFNPATEEELC(BTD[C])QVEEGDKEDVDK KFPVFNPATEEELC(BTD[C])QVEEGDKEDVDK FPVFNPATEEELC(BTD[C])QVEEGDKEDVDK|NPATEEELC(BTD[C])QVEEGDKEDVDK PVFNPATEEELC(BTD[C])QVEEGDKEDVDK KFPVFNPATEEELC(BTD[C])QVEEGDKEDVDK KFPVFNPATEEELC(BTD[C])QVEEGDK FPVFNPATEEELC(BTD[C])QVEEGDKEDVDK	7|6	1.41|1.62	1.515	0.14849	13	2
328	Q15370	60	ELOB	ELOB_HUMAN Elongin-B OS=Homo sapiens OX=9606 GN=ELOB PE=1 SV=1	GEC(BTD[C])GFTSQTAR|GEC(BTD[C])GFTSQTAR	1|1	1.49|1.54	1.515	0.03536	2	2
329	P00558	108	PGK1	PGK1_HUMAN Phosphoglycerate kinase 1 OS=Homo sapiens OX=9606 GN=PGK1 PE=1 SV=3	AC(BTD[C])ANPAAGSVILLENLR|AC(BTD[C])ANPAAGSVILLENLR	1|1	1.7|1.33	1.515	0.26163	2	2
330	Q14019	10	COTL1	COTL1_HUMAN Coactosin-like protein OS=Homo sapiens OX=9606 GN=COTL1 PE=1 SV=3	|DKEAC(BTD[C])R IDKEAC(BTD[C])R	|12	|1.515	1.515	NA	12	1
331	P61006	23	RAB8A	RAB8A_HUMAN Ras-related protein Rab-8A OS=Homo sapiens OX=9606 GN=RAB8A PE=1 SV=1	TC(BTD[C])VLFR|TC(BTD[C])VLFR	1|1	1.64|1.38	1.51	0.18385	2	2
332	Q00610	918	CLTC	CLH1_HUMAN Clathrin heavy chain 1 OS=Homo sapiens OX=9606 GN=CLTC PE=1 SV=5	DPHLAC(BTD[C])VAYER|DPHLAC(BTD[C])VAYER	3|3	1.45|1.55	1.5	0.07071	6	2
333	P62979	149	RPS27A	RS27A_HUMAN Ubiquitin-40S ribosomal protein S27a OS=Homo sapiens OX=9606 GN=RPS27A PE=1 SV=2	CCLTYC(BTD[C])FNKPEDK|CCLTYC(BTD[C])FNKPEDK	2|1	1.605|1.38	1.4925	0.1591	3	2
334	Q13619	483	CUL4A	CUL4A_HUMAN Cullin-4A OS=Homo sapiens OX=9606 GN=CUL4A PE=1 SV=3	HEC(BTD[C])GAAFTSK|	4|	1.49|	1.49	NA	4	1
335	P49327	1992	FASN	FAS_HUMAN Fatty acid synthase OS=Homo sapiens OX=9606 GN=FASN PE=1 SV=3	DGLLENQTPEFFQDVC(BTD[C])KPK|DGLLENQTPEFFQDVC(BTD[C])KPK	1|1	1.34|1.64	1.49	0.21213	2	2
336	P78527	1904	PRKDC	PRKDC_HUMAN DNA-dependent protein kinase catalytic subunit OS=Homo sapiens OX=9606 GN=PRKDC PE=1 SV=3	|INQVFHGSC(BTD[C])ITEGNELTK	|1	|1.49	1.49	NA	1	1
337	O75369	450	FLNB	FLNB_HUMAN Filamin-B OS=Homo sapiens OX=9606 GN=FLNB PE=1 SV=2	|SPFVVQVGEAC(BTD[C])NPNACR	|2	|1.49	1.49	NA	2	1
338	Q9Y394	94	DHRS7	DHRS7_HUMAN Dehydrogenase/reductase SDR family member 7 OS=Homo sapiens OX=9606 GN=DHRS7 PE=1 SV=1	RC(BTD[C])LENGNLK|	1|	1.48|	1.48	NA	1	1
339	P83731	36	RPL24	RL24_HUMAN 60S ribosomal protein L24 OS=Homo sapiens OX=9606 GN=RPL24 PE=1 SV=1	|AKC(BTD[C])ESAFLSK	|1	|1.48	1.48	NA	1	1
340	Q9ULV4	343	CORO1C	COR1C_HUMAN Coronin-1C OS=Homo sapiens OX=9606 GN=CORO1C PE=1 SV=1	KC(BTD[C])EPIIMTVPR|KC(BTD[C])EPIIMTVPR	5|2	1.58|1.365	1.4725	0.15203	7	2
341	P22059	609	OSBP	OSBP1_HUMAN Oxysterol-binding protein 1 OS=Homo sapiens OX=9606 GN=OSBP PE=1 SV=1	TGDKC(BTD[C])NLK|TGDKC(BTD[C])NLK	1|2	1.21|1.73	1.47	0.3677	3	2
342	P00352	133	ALDH1A1	AL1A1_HUMAN Retinal dehydrogenase 1 OS=Homo sapiens OX=9606 GN=ALDH1A1 PE=1 SV=2	YC(BTD[C])AGWADK|YC(BTD[C])AGWADK	1|1	1.02|1.92	1.47	0.6364	2	2
343	O95782	331	AP2A1	AP2A1_HUMAN AP-2 complex subunit alpha-1 OS=Homo sapiens OX=9606 GN=AP2A1 PE=1 SV=3	|AC(BTD[C])NQLGQFLQHR	|1	|1.47	1.47	NA	1	1
344	P68104	411	EEF1A1	EF1A1_HUMAN Elongation factor 1-alpha 1 OS=Homo sapiens OX=9606 GN=EEF1A1 PE=1 SV=1	|SGDAAIVDMVPGKPMC(BTD[C])VESFSDYPPLGR	|1	|1.47	1.47	NA	1	1
345	P50552	64	VASP	VASP_HUMAN Vasodilator-stimulated phosphoprotein OS=Homo sapiens OX=9606 GN=VASP PE=1 SV=3	|MQPDQQVVINC(BTD[C])AIVR	|1	|1.47	1.47	NA	1	1
346	P00558	99	PGK1	PGK1_HUMAN Phosphoglycerate kinase 1 OS=Homo sapiens OX=9606 GN=PGK1 PE=1 SV=3	DC(BTD[C])VGPEVEK DVLFLKDC(BTD[C])VGPEVEK|DC(BTD[C])VGPEVEK DVLFLKDC(BTD[C])VGPEVEK	4|2	1.28|1.65	1.465	0.26163	6	2
347	P11142	603	HSPA8	HSP7C_HUMAN Heat shock cognate 71 kDa protein OS=Homo sapiens OX=9606 GN=HSPA8 PE=1 SV=1	|ELEKVC(BTD[C])NPIITK VC(BTD[C])NPIITK	|3	|1.46	1.46	NA	3	1
348	Q9ULA0	327	DNPEP	DNPEP_HUMAN Aspartyl aminopeptidase OS=Homo sapiens OX=9606 GN=DNPEP PE=1 SV=1	|ISASC(BTD[C])QHPTAFEEAIPK	|1	|1.46	1.46	NA	1	1
349	P28066	47	PSMA5	PSA5_HUMAN Proteasome subunit alpha type-5 OS=Homo sapiens OX=9606 GN=PSMA5 PE=1 SV=3	|LGSTAIGIQTSEGVC(BTD[C])LAVEK	|1	|1.46	1.46	NA	1	1
350	Q96DG6	121	CMBL	CMBL_HUMAN Carboxymethylenebutenolidase homolog OS=Homo sapiens OX=9606 GN=CMBL PE=1 SV=1	|QQC(BTD[C])HAQK	|1	|1.46	1.46	NA	1	1
351	Q00839	562	HNRNPU	HNRPU_HUMAN Heterogeneous nuclear ribonucleoprotein U OS=Homo sapiens OX=9606 GN=HNRNPU PE=1 SV=6	|APQC(BTD[C])LGK	|2	|1.455	1.455	NA	2	1
352	P14678	19	SNRPB	RSMB_HUMAN Small nuclear ribonucleoprotein-associated proteins B and B' OS=Homo sapiens OX=9606 GN=SNRPB PE=1 SV=2	MRC(BTD[C])ILQDGR RC(BTD[C])ILQDGR|MRC(BTD[C])ILQDGR RC(BTD[C])ILQDGR	5|5	1.41|1.48	1.445	0.0495	10	2
353	P40227	366	CCT6A	TCPZ_HUMAN T-complex protein 1 subunit zeta OS=Homo sapiens OX=9606 GN=CCT6A PE=1 SV=3	FTFIEKC(BTD[C])NNPR|FTFIEKC(BTD[C])NNPR	1|1	2.34|0.54	1.44	1.27279	2	2
354	Q92979	171	EMG1	NEP1_HUMAN Ribosomal RNA small subunit methyltransferase NEP1 OS=Homo sapiens OX=9606 GN=EMG1 PE=1 SV=4	|NPVSDHFPVGC(BTD[C])MK	|1	|1.44	1.44	NA	1	1
355	P62753	12	RPS6	RS6_HUMAN 40S ribosomal protein S6 OS=Homo sapiens OX=9606 GN=RPS6 PE=1 SV=1	PATGC(BTD[C])QK FPATGC(BTD[C])QK ISFPATGC(BTD[C])QK|FPATGC(BTD[C])QK NISFPATGC(BTD[C])QK	6|3	1.115|1.76	1.4375	0.45608	9	2
356	Q9Y490	1023	TLN1	TLN1_HUMAN Talin-1 OS=Homo sapiens OX=9606 GN=TLN1 PE=1 SV=3	ASVPTIQDQASAMQLSQC(BTD[C])AK|ASVPTIQDQASAMQLSQC(BTD[C])AK	1|1	1.11|1.76	1.435	0.45962	2	2
357	P14618	49	PKM	KPYM_HUMAN Pyruvate kinase PKM OS=Homo sapiens OX=9606 GN=PKM PE=1 SV=4	IC(BTD[C])TIGPASR IIC(BTD[C])TIGPASR NTGIIC(BTD[C])TIGPASR GIIC(BTD[C])TIGPASR|IC(BTD[C])TIGPASR IIC(BTD[C])TIGPASR NTGIIC(BTD[C])TIGPASR TGIIC(BTD[C])TIGPASR	8|10	1.32|1.55	1.435	0.16263	18	2
358	Q14103	252	HNRNPD	HNRPD_HUMAN Heterogeneous nuclear ribonucleoprotein D0 OS=Homo sapiens OX=9606 GN=HNRNPD PE=1 SV=1	YHNVGLSKC(BTD[C])EIK|	3|	1.43|	1.43	NA	3	1
359	Q9UBT2	185	UBA2	SAE2_HUMAN SUMO-activating enzyme subunit 2 OS=Homo sapiens OX=9606 GN=UBA2 PE=1 SV=2	NTPSEPIHC(BTD[C])IVWAK|	1|	1.43|	1.43	NA	1	1
360	O75369	1915	FLNB	FLNB_HUMAN Filamin-B OS=Homo sapiens OX=9606 GN=FLNB PE=1 SV=2	RC(BTD[C])SQVK|	1|	1.43|	1.43	NA	1	1
361	P62873	25	GNB1	GBB1_HUMAN Guanine nucleotide-binding protein G(I)/G(S)/G(T) subunit beta-1 OS=Homo sapiens OX=9606 GN=GNB1 PE=1 SV=3	|KAC(BTD[C])ADATLSQITNNIDPVGR	|1	|1.43	1.43	NA	1	1
362	P11142	17	HSPA8	HSP7C_HUMAN Heat shock cognate 71 kDa protein OS=Homo sapiens OX=9606 GN=HSPA8 PE=1 SV=1	GPAVGIDLGTTYSC(BTD[C])VGVFQHGK|GPAVGIDLGTTYSC(BTD[C])VGVFQHGK	1|1	1.48|1.37	1.425	0.07778	2	2
363	Q14974	543	KPNB1	IMB1_HUMAN Importin subunit beta-1 OS=Homo sapiens OX=9606 GN=KPNB1 PE=1 SV=2	NSAKDC(BTD[C])YPAVQK|	1|	1.41|	1.41	NA	1	1
364	P51648	214	ALDH3A2	AL3A2_HUMAN Fatty aldehyde dehydrogenase OS=Homo sapiens OX=9606 GN=ALDH3A2 PE=1 SV=1	SPC(BTD[C])YIDK|SPC(BTD[C])YIDK	1|2	1.48|1.34	1.41	0.09899	3	2
365	Q9Y265	49	RUVBL1	RUVB1_HUMAN RuvB-like 1 OS=Homo sapiens OX=9606 GN=RUVBL1 PE=1 SV=1	|AC(BTD[C])GVIVELIK	|2	|1.41	1.41	NA	2	1
366	P42285	399	MTREX	MTREX_HUMAN Exosome RNA helicase MTR4 OS=Homo sapiens OX=9606 GN=MTREX PE=1 SV=3	KDC(BTD[C])EAYALQMTK|KDC(BTD[C])EAYALQMTK	1|1	1.33|1.48	1.405	0.10607	2	2
367	P62280	60	RPS11	RS11_HUMAN 40S ribosomal protein S11 OS=Homo sapiens OX=9606 GN=RPS11 PE=1 SV=3	|KC(BTD[C])PFTGNVSIR	|2	|1.405	1.405	NA	2	1
368	Q6ZW61	426	BBS12	BBS12_HUMAN Bardet-Biedl syndrome 12 protein OS=Homo sapiens OX=9606 GN=BBS12 PE=1 SV=2	LIEKC(BTD[C])INSK|LIEKC(BTD[C])INSK	4|5	1.435|1.37	1.4025	0.04596	9	2
369	Q07955	16	SRSF1	SRSF1_HUMAN Serine/arginine-rich splicing factor 1 OS=Homo sapiens OX=9606 GN=SRSF1 PE=1 SV=2	PAGNNDC(BTD[C])R|PAGNNDC(BTD[C])R	2|2	1.34|1.46	1.4	0.08485	4	2
370	Q9Y399	162	MRPS2	RT02_HUMAN 28S ribosomal protein S2, mitochondrial OS=Homo sapiens OX=9606 GN=MRPS2 PE=1 SV=1	|DC(BTD[C])GEYAHTR	|1	|1.4	1.4	NA	1	1
371	Q13045	560	FLII	FLII_HUMAN Protein flightless-1 homolog OS=Homo sapiens OX=9606 GN=FLII PE=1 SV=2	|AC(BTD[C])SAIHAVNLR	|1	|1.39	1.39	NA	1	1
372	P62888	52	RPL30	RL30_HUMAN 60S ribosomal protein L30 OS=Homo sapiens OX=9606 GN=RPL30 PE=1 SV=2	NNC(BTD[C])PALR ANNC(BTD[C])PALR|NNC(BTD[C])PALR LANNC(BTD[C])PALR	4|2	1.475|1.3	1.3875	0.12374	6	2
373	P60866	36	RPS20	RS20_HUMAN 40S ribosomal protein S20 OS=Homo sapiens OX=9606 GN=RPS20 PE=1 SV=1	KVC(BTD[C])ADLIR|VC(BTD[C])ADLIR	3|2	1.35|1.42	1.385	0.0495	5	2
374	Q99613	752	EIF3C	EIF3C_HUMAN Eukaryotic translation initiation factor 3 subunit C OS=Homo sapiens OX=9606 GN=EIF3C PE=1 SV=1	TC(BTD[C])HSFIINEK|TC(BTD[C])HSFIINEK	1|1	2.12|0.65	1.385	1.03945	2	2
375	O15523	315	DDX3Y	DDX3Y_HUMAN ATP-dependent RNA helicase DDX3Y OS=Homo sapiens OX=9606 GN=DDX3Y PE=1 SV=2	GC(BTD[C])HLLVATPGR|GC(BTD[C])HLLVATPGR	3|2	1.43|1.34	1.385	0.06364	5	2
376	P60866	70	RPS20	RS20_HUMAN 40S ribosomal protein S20 OS=Homo sapiens OX=9606 GN=RPS20 PE=1 SV=1	TPC(BTD[C])GEGSK KTPC(BTD[C])GEGSK|TPC(BTD[C])GEGSK KTPC(BTD[C])GEGSK	7|10	1.32|1.44	1.38	0.08485	17	2
377	Q15149	3295	PLEC	PLEC_HUMAN Plectin OS=Homo sapiens OX=9606 GN=PLEC PE=1 SV=3	VPLDVAC(BTD[C])AR|	1|	1.38|	1.38	NA	1	1
378	P62857	27	RPS28	RS28_HUMAN 40S ribosomal protein S28 OS=Homo sapiens OX=9606 GN=RPS28 PE=1 SV=1	SQGQC(BTD[C])TQVR TGSQGQC(BTD[C])TQVR QGQC(BTD[C])TQVR|GSQGQC(BTD[C])TQVR SQGQC(BTD[C])TQVR TGSQGQC(BTD[C])TQVR	9|10	1.47|1.285	1.3775	0.13081	19	2
379	P18206	737	VCL	VINC_HUMAN Vinculin OS=Homo sapiens OX=9606 GN=VCL PE=1 SV=4	DLDKC(BTD[C])K|DLDKC(BTD[C])K	1|2	1.31|1.445	1.3775	0.09546	3	2
380	Q8IUZ5	443	PHYKPL	AT2L2_HUMAN 5-phosphohydroxy-L-lysine phospho-lyase OS=Homo sapiens OX=9606 GN=PHYKPL PE=1 SV=1	SC(BTD[C])ETLR|	2|	1.37|	1.37	NA	2	1
381	Q6PUV4	90	CPLX2	CPLX2_HUMAN Complexin-2 OS=Homo sapiens OX=9606 GN=CPLX2 PE=2 SV=2	AALEQPC(BTD[C])EGSLTRPK|AALEQPC(BTD[C])EGSLTRPK	1|3	1.7|1.04	1.37	0.46669	4	2
382	O43933	27	PEX1	PEX1_HUMAN Peroxisome biogenesis factor 1 OS=Homo sapiens OX=9606 GN=PEX1 PE=1 SV=1	|DC(BTD[C])FLHLPR	|1	|1.37	1.37	NA	1	1
383	O43414	313	ERI3	ERI3_HUMAN ERI1 exoribonuclease 3 OS=Homo sapiens OX=9606 GN=ERI3 PE=1 SV=2	PHSGIDDC(BTD[C])K|	1|	1.36|	1.36	NA	1	1
384	O43747	106	AP1G1	AP1G1_HUMAN AP-1 complex subunit gamma-1 OS=Homo sapiens OX=9606 GN=AP1G1 PE=1 SV=5	QDVHLLMTNC(BTD[C])IK|	1|	1.36|	1.36	NA	1	1
385	P12814	180	ACTN1	ACTN1_HUMAN Alpha-actinin-1 OS=Homo sapiens OX=9606 GN=ACTN1 PE=1 SV=2	FC(BTD[C])AILHR DGLGFC(BTD[C])ALIHR|	4|	1.36|	1.36	NA	4	1
386	Q9BXJ9	508	NAA15	NAA15_HUMAN N-alpha-acetyltransferase 15, NatA auxiliary subunit OS=Homo sapiens OX=9606 GN=NAA15 PE=1 SV=1	KC(BTD[C])HEIER|KC(BTD[C])HEIER	1|1	1.21|1.51	1.36	0.21213	2	2
387	P21333	483	FLNA	FLNA_HUMAN Filamin-A OS=Homo sapiens OX=9606 GN=FLNA PE=1 SV=4	SPYTVTVGQACNPSAC(BTD[C])R|SPYTVTVGQACNPSAC(BTD[C])R	2|2	1.405|1.31	1.3575	0.06718	4	2
388	P13639	41	EEF2	EF2_HUMAN Elongation factor 2 OS=Homo sapiens OX=9606 GN=EEF2 PE=1 SV=4	TDSLVC(BTD[C])K LTDSLVC(BTD[C])K|TDSLVC(BTD[C])K	3|1	1.51|1.19	1.35	0.22627	4	2
389	P62937	115	PPIA	PPIA_HUMAN Peptidyl-prolyl cis-trans isomerase A OS=Homo sapiens OX=9606 GN=PPIA PE=1 SV=2	HTGPGILSMANAGPNTNGSQFFIC(BTD[C])TAK|HTGPGILSMANAGPNTNGSQFFIC(BTD[C])TAK	1|1	1.62|1.08	1.35	0.38184	2	2
390	P34932	146	HSPA4	HSP74_HUMAN Heat shock 70 kDa protein 4 OS=Homo sapiens OX=9606 GN=HSPA4 PE=1 SV=4	KPVVDCVVSVPC(BTD[C])FYTDAER|	1|	1.35|	1.35	NA	1	1
391	Q7LBR1	25	CHMP1B	CHM1B_HUMAN Charged multivesicular body protein 1b OS=Homo sapiens OX=9606 GN=CHMP1B PE=1 SV=1	KC(BTD[C])DKEEK|	3|	1.35|	1.35	NA	3	1
392	P61158	408	ACTR3	ARP3_HUMAN Actin-related protein 3 OS=Homo sapiens OX=9606 GN=ACTR3 PE=1 SV=3	|KDYEEIGPSIC(BTD[C])R	|1	|1.35	1.35	NA	1	1
393	P05556	691	ITGB1	ITB1_HUMAN Integrin beta-1 OS=Homo sapiens OX=9606 GN=ITGB1 PE=1 SV=2	DKLPQPVQPDPVSHC(BTD[C])K|DKLPQPVQPDPVSHC(BTD[C])K	2|1	1.31|1.38	1.345	0.0495	3	2	Disulfide bond
394	Q9BZL1	18	UBL5	UBL5_HUMAN Ubiquitin-like protein 5 OS=Homo sapiens OX=9606 GN=UBL5 PE=1 SV=1	VKC(BTD[C])NTDDTIGDLK|VKC(BTD[C])NTDDTIGDLK	1|1	1.26|1.43	1.345	0.12021	2	2
395	Q96KP4	205	CNDP2	CNDP2_HUMAN Cytosolic non-specific dipeptidase OS=Homo sapiens OX=9606 GN=CNDP2 PE=1 SV=2	KPC(BTD[C])ITYGLR|KPC(BTD[C])ITYGLR	1|1	1.25|1.44	1.345	0.13435	2	2
396	P52788	237	SMS	SPSY_HUMAN Spermine synthase OS=Homo sapiens OX=9606 GN=SMS PE=1 SV=2	KTC(BTD[C])GDVLDNLK|KTC(BTD[C])GDVLDNLK	2|4	1.35|1.34	1.345	0.00707	6	2
397	Q8IZL8	522	PELP1	PELP1_HUMAN Proline-, glutamic acid- and leucine-rich protein 1 OS=Homo sapiens OX=9606 GN=PELP1 PE=1 SV=2	KGDSNANSDVC(BTD[C])AAALR|KGDSNANSDVC(BTD[C])AAALR	2|2	1.245|1.44	1.3425	0.13789	4	2
398	P21333	1157	FLNA	FLNA_HUMAN Filamin-A OS=Homo sapiens OX=9606 GN=FLNA PE=1 SV=4	|AHVVPC(BTD[C])FDASK	|1	|1.34	1.34	NA	1	1
399	Q15436	61	SEC23A	SC23A_HUMAN Protein transport protein Sec23A OS=Homo sapiens OX=9606 GN=SEC23A PE=1 SV=2	|RPDLPPIQYEPVLC(BTD[C])SR	|1	|1.34	1.34	NA	1	1	Metal binding
400	Q15637	171	SF1	SF01_HUMAN Splicing factor 1 OS=Homo sapiens OX=9606 GN=SF1 PE=1 SV=4	|NIEKEC(BTD[C])NAK	|3	|1.33	1.33	NA	3	1
401	Q96KR1	899	ZFR	ZFR_HUMAN Zinc finger RNA-binding protein OS=Homo sapiens OX=9606 GN=ZFR PE=1 SV=2	QKC(BTD[C])LDALAALR|QKC(BTD[C])LDALAALR	1|1	1.64|1.01	1.325	0.44548	2	2
402	Q05519	455	SRSF11	SRS11_HUMAN Serine/arginine-rich splicing factor 11 OS=Homo sapiens OX=9606 GN=SRSF11 PE=1 SV=1	TKEC(BTD[C])SVEK|	2|	1.32|	1.32	NA	2	1
403	Q13011	159	ECH1	ECH1_HUMAN Delta(3,5)-Delta(2,4)-dienoyl-CoA isomerase, mitochondrial OS=Homo sapiens OX=9606 GN=ECH1 PE=1 SV=2	YQETFNVIERC(BTD[C])PK|	1|	1.32|	1.32	NA	1	1
404	Q9GZT3	48	SLIRP	SLIRP_HUMAN SRA stem-loop-interacting RNA-binding protein, mitochondrial OS=Homo sapiens OX=9606 GN=SLIRP PE=1 SV=1	RC(BTD[C])ILPFDK|RC(BTD[C])ILPFDK	3|2	1.2|1.44	1.32	0.16971	5	2
405	P49720	19	PSMB3	PSB3_HUMAN Proteasome subunit beta type-3 OS=Homo sapiens OX=9606 GN=PSMB3 PE=1 SV=2	KNC(BTD[C])VAIAADR GKNC(BTD[C])VAIAADR NC(BTD[C])VAIAADR|KNC(BTD[C])VAIAADR GKNC(BTD[C])VAIAADR NC(BTD[C])VAIAADRR	6|7	1.32|1.31	1.315	0.00707	13	2
406	Q9Y315	182	DERA	DEOC_HUMAN Deoxyribose-phosphate aldolase OS=Homo sapiens OX=9606 GN=DERA PE=1 SV=2	AC(BTD[C])GEAHLK KAC(BTD[C])GEAHLK|AC(BTD[C])GEAHLK KAC(BTD[C])GEAHLK	5|3	1.39|1.23	1.31	0.11314	8	2
407	O00231	289	PSMD11	PSD11_HUMAN 26S proteasome non-ATPase regulatory subunit 11 OS=Homo sapiens OX=9606 GN=PSMD11 PE=1 SV=3	QTEALKC(BTD[C])VAQASK|QTEALKC(BTD[C])VAQASK	1|1	0.92|1.7	1.31	0.55154	2	2
408	O94925	178	GLS	GLSK_HUMAN Glutaminase kidney isoform, mitochondrial OS=Homo sapiens OX=9606 GN=GLS PE=1 SV=1	|LKEC(BTD[C])MDMLR	|1	|1.31	1.31	NA	1	1
409	Q9Y3E7	60	CHMP3	CHMP3_HUMAN Charged multivesicular body protein 3 OS=Homo sapiens OX=9606 GN=CHMP3 PE=1 SV=3	|VC(BTD[C])IVLAK	|1	|1.31	1.31	NA	1	1
410	Q13616	291	CUL1	CUL1_HUMAN Cullin-1 OS=Homo sapiens OX=9606 GN=CUL1 PE=1 SV=2	KC(BTD[C])EQVLIEK|KC(BTD[C])EQVLIEK	3|2	1.29|1.31	1.3	0.01414	5	2
411	P49327	1828	FASN	FAS_HUMAN Fatty acid synthase OS=Homo sapiens OX=9606 GN=FASN PE=1 SV=3	DGVVRPLKC(BTD[C])TVFHGAQVEDAFR|	2|	1.295|	1.295	NA	2	1
412	P47712	620	PLA2G4A	PA24A_HUMAN Cytosolic phospholipase A2 OS=Homo sapiens OX=9606 GN=PLA2G4A PE=1 SV=2	|EC(BTD[C])YVFKPK	|1	|1.29	1.29	NA	1	1
413	Q9Y490	1509	TLN1	TLN1_HUMAN Talin-1 OS=Homo sapiens OX=9606 GN=TLN1 PE=1 SV=3	HTSALCNSC(BTD[C])R|	2|	1.285|	1.285	NA	2	1
414	Q9NSU2	35	TREX1	TREX1_HUMAN Three-prime repair exonuclease 1 OS=Homo sapiens OX=9606 GN=TREX1 PE=1 SV=2	|LC(BTD[C])LLAVHR	|1	|1.28	1.28	NA	1	1
415	P49721	163	PSMB2	PSB2_HUMAN Proteasome subunit beta type-2 OS=Homo sapiens OX=9606 GN=PSMB2 PE=1 SV=1	KC(BTD[C])LEELQK|KC(BTD[C])LEELQK	4|3	1.23|1.32	1.275	0.06364	7	2
416	Q6UXN9	287	WDR82	WDR82_HUMAN WD repeat-containing protein 82 OS=Homo sapiens OX=9606 GN=WDR82 PE=1 SV=1	HTGPITC(BTD[C])LQFNPK|HTGPITC(BTD[C])LQFNPK	1|1	1.09|1.46	1.275	0.26163	2	2
417	Q9Y383	348	LUC7L2	LC7L2_HUMAN Putative RNA-binding protein Luc7-like 2 OS=Homo sapiens OX=9606 GN=LUC7L2 PE=1 SV=2	FRDQDLASC(BTD[C])DR|	1|	1.27|	1.27	NA	1	1
418	Q9Y281	39	CFL2	COF2_HUMAN Cofilin-2 OS=Homo sapiens OX=9606 GN=CFL2 PE=1 SV=1	FC(BTD[C])LSDDKR|FC(BTD[C])LSDDKR	2|2	1.42|1.12	1.27	0.21213	4	2
419	P16455	145	MGMT	MGMT_HUMAN Methylated-DNA--protein-cysteine methyltransferase OS=Homo sapiens OX=9606 GN=MGMT PE=1 SV=1	GNPVPILIPC(BTD[C])HR|GNPVPILIPC(BTD[C])HR	2|1	1.14|1.4	1.27	0.18385	3	2	Active site
420	P09622	484	DLD	DLDH_HUMAN Dihydrolipoyl dehydrogenase, mitochondrial OS=Homo sapiens OX=9606 GN=DLD PE=1 SV=2	|VC(BTD[C])HAHPTLSEAFR	|2	|1.27	1.27	NA	2	1
421	Q9HBI6	354	CYP4F11	CP4FB_HUMAN Phylloquinone omega-hydroxylase CYP4F11 OS=Homo sapiens OX=9606 GN=CYP4F11 PE=1 SV=3	HPEYQEQC(BTD[C])R|	2|	1.26|	1.26	NA	2	1
422	P31948	278	STIP1	STIP1_HUMAN Stress-induced-phosphoprotein 1 OS=Homo sapiens OX=9606 GN=STIP1 PE=1 SV=1	|GDYNKC(BTD[C])R	|2	|1.255	1.255	NA	2	1
423	P09382	61	LGALS1	LEG1_HUMAN Galectin-1 OS=Homo sapiens OX=9606 GN=LGALS1 PE=1 SV=2	NAHGDANTIVC(BTD[C])NSK AHGDANTIVC(BTD[C])NSK HGDANTIVC(BTD[C])NSK FNAHGDANTIVC(BTD[C])NSK|NAHGDANTIVC(BTD[C])NSK AHGDANTIVC(BTD[C])NSK HGDANTIVC(BTD[C])NSK FNAHGDANTIVC(BTD[C])NSK	10|12	1.21|1.295	1.2525	0.0601	22	2
424	O60218	45	AKR1B10	AK1BA_HUMAN Aldo-keto reductase family 1 member B10 OS=Homo sapiens OX=9606 GN=AKR1B10 PE=1 SV=2	HIDC(BTD[C])AYVYQNEHEVGEAIQEK DC(BTD[C])AYVYQNEHEVGEAIQEK|	2|	1.245|	1.245	NA	2	1
425	P24752	126	ACAT1	THIL_HUMAN Acetyl-CoA acetyltransferase, mitochondrial OS=Homo sapiens OX=9606 GN=ACAT1 PE=1 SV=1	VC(BTD[C])ASGMK|	3|	1.24|	1.24	NA	3	1	Active site
426	Q99829	53	CPNE1	CPNE1_HUMAN Copine-1 OS=Homo sapiens OX=9606 GN=CPNE1 PE=1 SV=1	RNC(BTD[C])SSPEFSK|	1|	1.24|	1.24	NA	1	1
427	P15121	187	AKR1B1	ALDR_HUMAN Aldo-keto reductase family 1 member B1 OS=Homo sapiens OX=9606 GN=AKR1B1 PE=1 SV=3	YKPAVNQIEC(BTD[C])HPYLTQEK PAVNQIEC(BTD[C])HPYLTQEK|YKPAVNQIEC(BTD[C])HPYLTQEK PAVNQIEC(BTD[C])HPYLTQEK	14|10	1.25|1.23	1.24	0.01414	24	2
428	Q5TDH0	332	DDI2	DDI2_HUMAN Protein DDI1 homolog 2 OS=Homo sapiens OX=9606 GN=DDI2 PE=1 SV=1	HQC(BTD[C])SIDLK|	1|	1.24|	1.24	NA	1	1
429	Q16762	248	TST	THTR_HUMAN Thiosulfate sulfurtransferase OS=Homo sapiens OX=9606 GN=TST PE=1 SV=4	KVDLSQPLIATC(BTD[C])R|	2|	1.24|	1.24	NA	2	1	Active site
430	P49327	1471	FASN	FAS_HUMAN Fatty acid synthase OS=Homo sapiens OX=9606 GN=FASN PE=1 SV=3	LRC(BTD[C])VLLSNLSSTSHVPEVDPGSAELQK|	1|	1.24|	1.24	NA	1	1
431	P16615	997	ATP2A2	AT2A2_HUMAN Sarcoplasmic/endoplasmic reticulum calcium ATPase 2 OS=Homo sapiens OX=9606 GN=ATP2A2 PE=1 SV=1	NYLEPGKEC(BTD[C])VQPATK|NYLEPGKEC(BTD[C])VQPATK	2|2	1.205|1.27	1.2375	0.04596	4	2
432	P09936	152	UCHL1	UCHL1_HUMAN Ubiquitin carboxyl-terminal hydrolase isozyme L1 OS=Homo sapiens OX=9606 GN=UCHL1 PE=1 SV=2	NEAIQAAHDAVAQEGQC(BTD[C])R|NEAIQAAHDAVAQEGQC(BTD[C])R	4|4	1.25|1.22	1.235	0.02121	8	2
433	P38117	42	ETFB	ETFB_HUMAN Electron transfer flavoprotein subunit beta OS=Homo sapiens OX=9606 GN=ETFB PE=1 SV=3	NPFC(BTD[C])EIAVEEAVR|	2|	1.235|	1.235	NA	2	1
434	O14964	75	HGS	HGS_HUMAN Hepatocyte growth factor-regulated tyrosine kinase substrate OS=Homo sapiens OX=9606 GN=HGS PE=1 SV=1	NC(BTD[C])GQTVHDEVANK|NC(BTD[C])GQTVHDEVANK	2|3	1.25|1.21	1.23	0.02828	5	2
435	Q99733	77	NAP1L4	NP1L4_HUMAN Nucleosome assembly protein 1-like 4 OS=Homo sapiens OX=9606 GN=NAP1L4 PE=1 SV=1	C(BTD[C])AHIEAK|	1|	1.23|	1.23	NA	1	1
436	P35579	988	MYH9	MYH9_HUMAN Myosin-9 OS=Homo sapiens OX=9606 GN=MYH9 PE=1 SV=4	|LEEEQIILEDQNC(BTD[C])K	|2	|1.23	1.23	NA	2	1
437	P10768	28	ESD	ESTD_HUMAN S-formylglutathione hydrolase OS=Homo sapiens OX=9606 GN=ESD PE=1 SV=2	EHDSVELNC(BTD[C])K|EHDSVELNC(BTD[C])K	1|1	1.28|1.17	1.225	0.07778	2	2
438	P00558	50	PGK1	PGK1_HUMAN Phosphoglycerate kinase 1 OS=Homo sapiens OX=9606 GN=PGK1 PE=1 SV=3	FC(BTD[C])LDNGAK|FC(BTD[C])LDNGAK	1|2	1.19|1.24	1.215	0.03536	3	2
439	Q14847	5	LASP1	LASP1_HUMAN LIM and SH3 domain protein 1 OS=Homo sapiens OX=9606 GN=LASP1 PE=1 SV=2	NPNC(BTD[C])AR|	1|	1.21|	1.21	NA	1	1
440	O75369	416	FLNB	FLNB_HUMAN Filamin-B OS=Homo sapiens OX=9606 GN=FLNB PE=1 SV=2	C(BTD[C])VYKPMQPGPHVVK|	2|	1.21|	1.21	NA	2	1
441	P37108	56	SRP14	SRP14_HUMAN Signal recognition particle 14 kDa protein OS=Homo sapiens OX=9606 GN=SRP14 PE=1 SV=2	EPADNKC(BTD[C])LLR FEPADNKC(BTD[C])LLR VEGFEPADNKC(BTD[C])LLR GTVEGFEPADNKC(BTD[C])LLR|EPADNKC(BTD[C])LLR GFEPADNKC(BTD[C])LLR	6|2	1.575|0.835	1.205	0.52326	8	2
442	P45974	838	USP5	UBP5_HUMAN Ubiquitin carboxyl-terminal hydrolase 5 OS=Homo sapiens OX=9606 GN=USP5 PE=1 SV=2	VC(BTD[C])ASEKPPK|	2|	1.2|	1.2	NA	2	1
443	Q06323	106	PSME1	PSME1_HUMAN Proteasome activator complex subunit 1 OS=Homo sapiens OX=9606 GN=PSME1 PE=1 SV=1	KGEDEDKGPPCGPVNC(BTD[C])NEK|	1|	1.2|	1.2	NA	1	1
444	P27816	654	MAP4	MAP4_HUMAN Microtubule-associated protein 4 OS=Homo sapiens OX=9606 GN=MAP4 PE=1 SV=3	KPC(BTD[C])NSQPSELSSETSGIAR|KPC(BTD[C])NSQPSELSSETSGIARPEEGRPVVSGTGNDITTPPNK	1|1	1.15|1.25	1.2	0.07071	2	2
445	Q07020	134	RPL18	RL18_HUMAN 60S ribosomal protein L18 OS=Homo sapiens OX=9606 GN=RPL18 PE=1 SV=2	GC(BTD[C])GTVLLSGPR|	2|	1.2|	1.2	NA	2	1
446	Q5SW79	967	CEP170	CE170_HUMAN Centrosomal protein of 170 kDa OS=Homo sapiens OX=9606 GN=CEP170 PE=1 SV=1	DRC(BTD[C])STGSPSK|	1|	1.2|	1.2	NA	1	1
447	P08708	35	RPS17	RS17_HUMAN 40S ribosomal protein S17 OS=Homo sapiens OX=9606 GN=RPS17 PE=1 SV=2	RVC(BTD[C])EEIAIIPSKK KRVC(BTD[C])EEIAIIPSK VC(BTD[C])EEIAIIPSKK RVC(BTD[C])EEIAIIPSK VC(BTD[C])EEIAIIPSK|KRVC(BTD[C])EEIAIIPSK VC(BTD[C])EEIAIIPSKK RVC(BTD[C])EEIAIIPSK	9|6	1.06|1.33	1.195	0.19092	15	2
448	P23528	39	CFL1	COF1_HUMAN Cofilin-1 OS=Homo sapiens OX=9606 GN=CFL1 PE=1 SV=3	FC(BTD[C])LSEDKK LFC(BTD[C])LSEDKK|FC(BTD[C])LSEDKK FC(BTD[C])LSEDK VLFC(BTD[C])LSEDKK AVLFC(BTD[C])LSEDKK	11|10	1.16|1.23	1.195	0.0495	21	2
449	P49321	708	NASP	NASP_HUMAN Nuclear autoantigenic sperm protein OS=Homo sapiens OX=9606 GN=NASP PE=1 SV=2	KPTDGASSSNC(BTD[C])VTDISHLVR|KPTDGASSSNC(BTD[C])VTDISHLVR	1|2	1.06|1.325	1.1925	0.18738	3	2
450	Q99729	224	HNRNPAB	ROAA_HUMAN Heterogeneous nuclear ribonucleoprotein A/B OS=Homo sapiens OX=9606 GN=HNRNPAB PE=1 SV=2	FHTVSGSKC(BTD[C])EIK|	3|	1.19|	1.19	NA	3	1
451	P60174	79	TPI1	TPIS_HUMAN Triosephosphate isomerase OS=Homo sapiens OX=9606 GN=TPI1 PE=1 SV=3	VPADTEVVC(BTD[C])APPTAYIDFAR|	1|	1.19|	1.19	NA	1	1
452	P53618	684	COPB1	COPB_HUMAN Coatomer subunit beta OS=Homo sapiens OX=9606 GN=COPB1 PE=1 SV=3	NEMNC(BTD[C])K|	1|	1.18|	1.18	NA	1	1
453	Q52LJ0	113	FAM98B	FA98B_HUMAN Protein FAM98B OS=Homo sapiens OX=9606 GN=FAM98B PE=1 SV=2	KEDC(BTD[C])LK|	1|	1.18|	1.18	NA	1	1
454	Q14566	26	MCM6	MCM6_HUMAN DNA replication licensing factor MCM6 OS=Homo sapiens OX=9606 GN=MCM6 PE=1 SV=1	|VAEKC(BTD[C])QK	|1	|1.18	1.18	NA	1	1
455	P14174	57	MIF	MIF_HUMAN Macrophage migration inhibitory factor OS=Homo sapiens OX=9606 GN=MIF PE=1 SV=4	|GGSSEPC(BTD[C])ALCSLHSIGK FGGSSEPC(BTD[C])ALCSLHSIGK	|4	|1.175	1.175	NA	4	1
456	Q15149	1156	PLEC	PLEC_HUMAN Plectin OS=Homo sapiens OX=9606 GN=PLEC PE=1 SV=3	LPLDKEPAREC(BTD[C])AQR|	3|	1.17|	1.17	NA	3	1
457	P50993	660	ATP1A2	AT1A2_HUMAN Sodium/potassium-transporting ATPase subunit alpha-2 OS=Homo sapiens OX=9606 GN=ATP1A2 PE=1 SV=1	AC(BTD[C])VVHGSDLK|	3|	1.17|	1.17	NA	3	1
458	Q96FV9	49	THOC1	THOC1_HUMAN THO complex subunit 1 OS=Homo sapiens OX=9606 GN=THOC1 PE=1 SV=1	KC(BTD[C])TLDQAFR|KC(BTD[C])TLDQAFR	2|1	1.25|1.09	1.17	0.11314	3	2
459	P05091	66	ALDH2	ALDH2_HUMAN Aldehyde dehydrogenase, mitochondrial OS=Homo sapiens OX=9606 GN=ALDH2 PE=1 SV=2	KTFPTVNPSTGEVIC(BTD[C])QVAEGDKEDVDK|	1|	1.17|	1.17	NA	1	1
460	P13639	728	EEF2	EF2_HUMAN Elongation factor 2 OS=Homo sapiens OX=9606 GN=EEF2 PE=1 SV=4	RC(BTD[C])LYASVLTAQPR|RC(BTD[C])LYASVLTAQPR	3|2	1.12|1.21	1.165	0.06364	5	2
461	Q71UM5	77	RPS27L	RS27L_HUMAN 40S ribosomal protein S27-like OS=Homo sapiens OX=9606 GN=RPS27L PE=1 SV=3	LTEGC(BTD[C])SFR|	1|	1.16|	1.16	NA	1	1
462	Q3LXA3	155	TKFC	TKFC_HUMAN Triokinase/FMN cyclase OS=Homo sapiens OX=9606 GN=TKFC PE=1 SV=2	GLC(BTD[C])GTVLIHK|	3|	1.16|	1.16	NA	3	1
463	P78527	3837	PRKDC	PRKDC_HUMAN DNA-dependent protein kinase catalytic subunit OS=Homo sapiens OX=9606 GN=PRKDC PE=1 SV=3	|APPC(BTD[C])EYKDWLTK	|1	|1.16	1.16	NA	1	1
464	Q92561	261	PHYHIP	PHYIP_HUMAN Phytanoyl-CoA hydroxylase-interacting protein OS=Homo sapiens OX=9606 GN=PHYHIP PE=1 SV=1	|LPLLDIAC(BTD[C])NK	|1	|1.16	1.16	NA	1	1
465	Q16658	89	FSCN1	FSCN1_HUMAN Fascin OS=Homo sapiens OX=9606 GN=FSCN1 PE=1 SV=3	PGPDC(BTD[C])R|PGPDC(BTD[C])R	3|2	1.2|1.11	1.155	0.06364	5	2
466	Q9GZT9	127	EGLN1	EGLN1_HUMAN Egl nine homolog 1 OS=Homo sapiens OX=9606 GN=EGLN1 PE=1 SV=1	AKPPADPAAAASPC(BTD[C])R|AKPPADPAAAASPC(BTD[C])R	3|1	1.1|1.2	1.15	0.07071	4	2
467	P13639	369	EEF2	EF2_HUMAN Elongation factor 2 OS=Homo sapiens OX=9606 GN=EEF2 PE=1 SV=4	YRC(BTD[C])ELLYEGPPDDEAAMGIK|	2|	1.15|	1.15	NA	2	1
468	P34932	140	HSPA4	HSP74_HUMAN Heat shock 70 kDa protein 4 OS=Homo sapiens OX=9606 GN=HSPA4 PE=1 SV=4	|KPVVDC(BTD[C])VVSVPCFYTDAER	|1	|1.15	1.15	NA	1	1
469	P62826	112	RAN	RAN_HUMAN GTP-binding nuclear protein Ran OS=Homo sapiens OX=9606 GN=RAN PE=1 SV=3	VC(BTD[C])ENIPIVLCGNK|	2|	1.145|	1.145	NA	2	1
470	Q9NQC3	1101	RTN4	RTN4_HUMAN Reticulon-4 OS=Homo sapiens OX=9606 GN=RTN4 PE=1 SV=2	YSNSALGHVNC(BTD[C])TIK|	3|	1.14|	1.14	NA	3	1
471	P62273	39	RPS29	RS29_HUMAN 40S ribosomal protein S29 OS=Homo sapiens OX=9606 GN=RPS29 PE=1 SV=2	YGLNMC(BTD[C])R|	1|	1.14|	1.14	NA	1	1	Metal binding
472	Q8NFJ5	284	GPRC5A	RAI3_HUMAN Retinoic acid-induced protein 3 OS=Homo sapiens OX=9606 GN=GPRC5A PE=1 SV=2	NPMDYPVEDAFC(BTD[C])KPQLVK|	1|	1.14|	1.14	NA	1	1
473	P21333	2543	FLNA	FLNA_HUMAN Filamin-A OS=Homo sapiens OX=9606 GN=FLNA PE=1 SV=4	ATC(BTD[C])APQHGAPGPGPADASK|ATC(BTD[C])APQHGAPGPGPADASK	1|4	1.17|1.095	1.1325	0.05303	5	2
474	O43347	167	MSI1	MSI1H_HUMAN RNA-binding protein Musashi homolog 1 OS=Homo sapiens OX=9606 GN=MSI1 PE=1 SV=1	VC(BTD[C])EIHFHEINNK|	1|	1.13|	1.13	NA	1	1
475	P30566	266	ADSL	PUR8_HUMAN Adenylosuccinate lyase OS=Homo sapiens OX=9606 GN=ADSL PE=1 SV=2	IC(BTD[C])TDIR|IC(BTD[C])TDIR	1|1	1.06|1.2	1.13	0.09899	2	2
476	Q96I25	302	RBM17	SPF45_HUMAN Splicing factor 45 OS=Homo sapiens OX=9606 GN=RBM17 PE=1 SV=1	|SDSNPLTEILKC(BTD[C])PTK	|2	|1.13	1.13	NA	2	1
477	Q9NUI1	53	DECR2	DECR2_HUMAN Peroxisomal 2,4-dienoyl-CoA reductase OS=Homo sapiens OX=9606 GN=DECR2 PE=1 SV=1	HGC(BTD[C])HTVIASR GC(BTD[C])HTVIASR|HGC(BTD[C])HTVIASR GC(BTD[C])HTVIASR	9|4	1.06|1.195	1.1275	0.09546	13	2
478	P14174	60	MIF	MIF_HUMAN Macrophage migration inhibitory factor OS=Homo sapiens OX=9606 GN=MIF PE=1 SV=4	LC(BTD[C])SLHSIGK|LC(BTD[C])SLHSIGK GGSSEPCALC(BTD[C])SLHSIGK	2|4	1.145|1.11	1.1275	0.02475	6	2
479	P07814	744	EPRS	SYEP_HUMAN Bifunctional glutamate/proline--tRNA ligase OS=Homo sapiens OX=9606 GN=EPRS PE=1 SV=5	ERPTPSLNNNC(BTD[C])TTSEDSLVLYNR|ERPTPSLNNNC(BTD[C])TTSEDSLVLYNR	2|1	1.09|1.16	1.125	0.0495	3	2
480	P60981	147	DSTN	DEST_HUMAN Destrin OS=Homo sapiens OX=9606 GN=DSTN PE=1 SV=3	AC(BTD[C])IAEK|	2|	1.12|	1.12	NA	2	1
481	P23396	134	RPS3	RS3_HUMAN 40S ribosomal protein S3 OS=Homo sapiens OX=9606 GN=RPS3 PE=1 SV=2	GC(BTD[C])EVVVSGK|GC(BTD[C])EVVVSGK	2|1	1.1|1.14	1.12	0.02828	3	2
482	P46821	262	MAP1B	MAP1B_HUMAN Microtubule-associated protein 1B OS=Homo sapiens OX=9606 GN=MAP1B PE=1 SV=2	KPCC(BTD[C])YIFPGGR|	1|	1.12|	1.12	NA	1	1
483	Q9BZG1	38	RAB34	RAB34_HUMAN Ras-related protein Rab-34 OS=Homo sapiens OX=9606 GN=RAB34 PE=1 SV=1	TC(BTD[C])ACQEHR|	1|	1.12|	1.12	NA	1	1
484	P63244	207	RACK1	RACK1_HUMAN Receptor of activated protein C kinase 1 OS=Homo sapiens OX=9606 GN=RACK1 PE=1 SV=3	|TNHIGHTGYLNTVTVSPDGSLC(BTD[C])ASGGK	|1	|1.12	1.12	NA	1	1
485	P43246	873	MSH2	MSH2_HUMAN DNA mismatch repair protein Msh2 OS=Homo sapiens OX=9606 GN=MSH2 PE=1 SV=1	|KC(BTD[C])YLER	|1	|1.11	1.11	NA	1	1
486	Q9ULV4	420	CORO1C	COR1C_HUMAN Coronin-1C OS=Homo sapiens OX=9606 GN=CORO1C PE=1 SV=1	KC(BTD[C])DLISIPK|KC(BTD[C])DLISIPK	2|4	1.175|1.04	1.1075	0.09546	6	2
487	P04083	270	ANXA1	ANXA1_HUMAN Annexin A1 OS=Homo sapiens OX=9606 GN=ANXA1 PE=1 SV=2	C(BTD[C])ATSKPAFFAEK|C(BTD[C])ATSKPAFFAEK	2|1	1.01|1.2	1.105	0.13435	3	2
488	P04083	263	ANXA1	ANXA1_HUMAN Annexin A1 OS=Homo sapiens OX=9606 GN=ANXA1 PE=1 SV=2	GDIEKC(BTD[C])LTAIVK|GDIEKC(BTD[C])LTAIVK	3|4	1.04|1.17	1.105	0.09192	7	2
489	P42330	188	AKR1C3	AK1C3_HUMAN Aldo-keto reductase family 1 member C3 OS=Homo sapiens OX=9606 GN=AKR1C3 PE=1 SV=4	PVC(BTD[C])NQVECHPYFNR|YKPVC(BTD[C])NQVECHPYFNR PVC(BTD[C])NQVECHPYFNR	1|5	1.04|1.16	1.1	0.08485	6	2
490	P39023	336	RPL3	RL3_HUMAN 60S ribosomal protein L3 OS=Homo sapiens OX=9606 GN=RPL3 PE=1 SV=2	GC(BTD[C])VVGTK|GC(BTD[C])VVGTK	1|2	1.12|1.08	1.1	0.02828	3	2
491	Q96Q11	373	TRNT1	TRNT1_HUMAN CCA tRNA nucleotidyltransferase 1, mitochondrial OS=Homo sapiens OX=9606 GN=TRNT1 PE=1 SV=2	YQGEHC(BTD[C])LLK|YQGEHC(BTD[C])LLK	2|1	1.16|1.04	1.1	0.08485	3	2	Disulfide bond
492	Q9UPN3	4906	MACF1	MACF1_HUMAN Microtubule-actin cross-linking factor 1, isoforms 1/2/3/5 OS=Homo sapiens OX=9606 GN=MACF1 PE=1 SV=4	LKDC(BTD[C])MQK|	1|	1.1|	1.1	NA	1	1
493	P53602	160	MVD	MVD1_HUMAN Diphosphomevalonate decarboxylase OS=Homo sapiens OX=9606 GN=MVD PE=1 SV=1	GSGSAC(BTD[C])R|	1|	1.09|	1.09	NA	1	1
494	P51858	108	HDGF	HDGF_HUMAN Hepatoma-derived growth factor OS=Homo sapiens OX=9606 GN=HDGF PE=1 SV=1	KSC(BTD[C])VEEPEPEPEAAEGDGDKK|KSC(BTD[C])VEEPEPEPEAAEGDGDKK	4|1	0.99|1.19	1.09	0.14142	5	2	Disulfide bond
495	P60981	39	DSTN	DEST_HUMAN Destrin OS=Homo sapiens OX=9606 GN=DSTN PE=1 SV=3	FC(BTD[C])LSADKK|FC(BTD[C])LSADKK IFC(BTD[C])LSADKK	2|3	1.06|1.11	1.085	0.03536	5	2
496	Q04828	188	AKR1C1	AK1C1_HUMAN Aldo-keto reductase family 1 member C1 OS=Homo sapiens OX=9606 GN=AKR1C1 PE=1 SV=1	|YKPVC(BTD[C])NQVECHPYFNQR PVC(BTD[C])NQVECHPYFNQR	|4	|1.085	1.085	NA	4	1
497	P63208	160	SKP1	SKP1_HUMAN S-phase kinase-associated protein 1 OS=Homo sapiens OX=9606 GN=SKP1 PE=1 SV=2	KENQWC(BTD[C])EEK|	3|	1.08|	1.08	NA	3	1
498	P27361	178	MAPK3	MK03_HUMAN Mitogen-activated protein kinase 3 OS=Homo sapiens OX=9606 GN=MAPK3 PE=1 SV=4	|DLKPSNLLINTTC(BTD[C])DLK	|1	|1.08	1.08	NA	1	1
499	P06748	21	NPM1	NPM_HUMAN Nucleophosmin OS=Homo sapiens OX=9606 GN=NPM1 PE=1 SV=2	NYLFGC(BTD[C])ELK|RPQNYLFGC(BTD[C])ELK NYLFGC(BTD[C])ELK	1|2	1.05|1.105	1.0775	0.03889	3	2
500	P60900	47	PSMA6	PSA6_HUMAN Proteasome subunit alpha type-6 OS=Homo sapiens OX=9606 GN=PSMA6 PE=1 SV=1	GKDC(BTD[C])AVIVTQK|GKDC(BTD[C])AVIVTQK	2|4	1.03|1.115	1.0725	0.0601	6	2
501	O75369	455	FLNB	FLNB_HUMAN Filamin-B OS=Homo sapiens OX=9606 GN=FLNB PE=1 SV=2	SPFVVQVGEACNPNAC(BTD[C])R|	1|	1.07|	1.07	NA	1	1
502	Q99714	91	HSD17B10	HCD2_HUMAN 3-hydroxyacyl-CoA dehydrogenase type-2 OS=Homo sapiens OX=9606 GN=HSD17B10 PE=1 SV=3	VDVAVNC(BTD[C])AGIAVASK|	1|	1.06|	1.06	NA	1	1
503	Q15149	965	PLEC	PLEC_HUMAN Plectin OS=Homo sapiens OX=9606 GN=PLEC PE=1 SV=3	|GDEC(BTD[C])QLVGPAQPSHWK	|1	|1.06	1.06	NA	1	1
504	Q96QK1	286	VPS35	VPS35_HUMAN Vacuolar protein sorting-associated protein 35 OS=Homo sapiens OX=9606 GN=VPS35 PE=1 SV=2	AC(BTD[C])AELHQNVNVK|AC(BTD[C])AELHQNVNVK	1|4	0.79|1.325	1.0575	0.3783	5	2
505	Q9UHD1	86	CHORDC1	CHRD1_HUMAN Cysteine and histidine-rich domain-containing protein 1 OS=Homo sapiens OX=9606 GN=CHORDC1 PE=1 SV=2	KELC(BTD[C])ELKPK ELC(BTD[C])ELKPK|ELC(BTD[C])ELKPK	5|2	1.12|0.99	1.055	0.09192	7	2
506	P09211	102	GSTP1	GSTP1_HUMAN Glutathione S-transferase P OS=Homo sapiens OX=9606 GN=GSTP1 PE=1 SV=2	DQQEAALVDMVNDGVEDLRC(BTD[C])K|DQQEAALVDMVNDGVEDLRC(BTD[C])K	5|1	1.21|0.9	1.055	0.2192	6	2
507	O14880	56	MGST3	MGST3_HUMAN Microsomal glutathione S-transferase 3 OS=Homo sapiens OX=9606 GN=MGST3 PE=1 SV=1	STDPENGHIFNC(BTD[C])IQR|STDPENGHIFNC(BTD[C])IQR TDPENGHIFNC(BTD[C])IQR	2|4	0.97|1.135	1.0525	0.11667	6	2
508	O75116	804	ROCK2	ROCK2_HUMAN Rho-associated protein kinase 2 OS=Homo sapiens OX=9606 GN=ROCK2 PE=1 SV=4	RC(BTD[C])LTQNDLK|	1|	1.05|	1.05	NA	1	1
509	O43399	74	TPD52L2	TPD54_HUMAN Tumor protein D54 OS=Homo sapiens OX=9606 GN=TPD52L2 PE=1 SV=2	ERHC(BTD[C])GELK|	1|	1.05|	1.05	NA	1	1
510	P46782	155	RPS5	RS5_HUMAN 40S ribosomal protein S5 OS=Homo sapiens OX=9606 GN=RPS5 PE=1 SV=4	|VNQAIWLLC(BTD[C])TGAR	|1	|1.05	1.05	NA	1	1
511	P39023	157	RPL3	RL3_HUMAN 60S ribosomal protein L3 OS=Homo sapiens OX=9606 GN=RPL3 PE=1 SV=2	KYC(BTD[C])QVIR YC(BTD[C])QVIR|KYC(BTD[C])QVIR	2|1	1.235|0.86	1.0475	0.26517	3	2
512	P23528	147	CFL1	COF1_HUMAN Cofilin-1 OS=Homo sapiens OX=9606 GN=CFL1 PE=1 SV=3	DRC(BTD[C])TLAEK|DRC(BTD[C])TLAEK HELQANCYEEVKDRC(BTD[C])TLAEK	6|15	1.04|1.05	1.045	0.00707	21	2
513	P12270	224	TPR	TPR_HUMAN Nucleoprotein TPR OS=Homo sapiens OX=9606 GN=TPR PE=1 SV=3	GNEILELKC(BTD[C])NLENK|	2|	1.04|	1.04	NA	2	1
514	Q09161	332	NCBP1	NCBP1_HUMAN Nuclear cap-binding protein subunit 1 OS=Homo sapiens OX=9606 GN=NCBP1 PE=1 SV=1	KTC(BTD[C])AAQLVSYPGK|KTC(BTD[C])AAQLVSYPGK	1|1	0.96|1.11	1.035	0.10607	2	2
515	P50991	295	CCT4	TCPD_HUMAN T-complex protein 1 subunit delta OS=Homo sapiens OX=9606 GN=CCT4 PE=1 SV=4	KTGC(BTD[C])NVLLIQK TGC(BTD[C])NVLLIQK|KTGC(BTD[C])NVLLIQK	3|1	1.06|1.01	1.035	0.03536	4	2
516	P15170	237	GSPT1	ERF3A_HUMAN Eukaryotic peptide chain release factor GTP-binding subunit ERF3A OS=Homo sapiens OX=9606 GN=GSPT1 PE=1 SV=1	YEEC(BTD[C])KEK|YEEC(BTD[C])KEK	3|1	1.11|0.96	1.035	0.10607	4	2
517	P60981	46	DSTN	DEST_HUMAN Destrin OS=Homo sapiens OX=9606 GN=DSTN PE=1 SV=3	KC(BTD[C])IIVEEGK|KC(BTD[C])IIVEEGK	4|2	1.025|1.035	1.03	0.00707	6	2
518	Q00610	682	CLTC	CLH1_HUMAN Clathrin heavy chain 1 OS=Homo sapiens OX=9606 GN=CLTC PE=1 SV=5	QNLQIC(BTD[C])VQVASK|	2|	1.03|	1.03	NA	2	1
519	Q9Y490	1087	TLN1	TLN1_HUMAN Talin-1 OS=Homo sapiens OX=9606 GN=TLN1 PE=1 SV=3	LKPLPGETMEKC(BTD[C])TQDLGNSTK|LKPLPGETMEKC(BTD[C])TQDLGNSTK	6|3	1.065|0.99	1.0275	0.05303	9	2
520	Q00341	566	HDLBP	VIGLN_HUMAN Vigilin OS=Homo sapiens OX=9606 GN=HDLBP PE=1 SV=2	NEVEKC(BTD[C])TK|NEVEKC(BTD[C])TK	1|8	1.04|1.005	1.0225	0.02475	9	2
521	Q92841	431	DDX17	DDX17_HUMAN Probable ATP-dependent RNA helicase DDX17 OS=Homo sapiens OX=9606 GN=DDX17 PE=1 SV=2	RRC(BTD[C])DDLTR|	2|	1.02|	1.02	NA	2	1
522	Q8WTS6	288	SETD7	SETD7_HUMAN Histone-lysine N-methyltransferase SETD7 OS=Homo sapiens OX=9606 GN=SETD7 PE=1 SV=1	YC(BTD[C])ASLGHK|	3|	1.02|	1.02	NA	3	1
523	P25398	50	RPS12	RS12_HUMAN 40S ribosomal protein S12 OS=Homo sapiens OX=9606 GN=RPS12 PE=1 SV=3	QAHLC(BTD[C])VLASNCDEPMYVK AHLC(BTD[C])VLASNCDEPMYVK|QAHLC(BTD[C])VLASNCDEPMYVK	2|1	0.905|1.13	1.0175	0.1591	3	2
524	P18669	55	PGAM1	PGAM1_HUMAN Phosphoglycerate mutase 1 OS=Homo sapiens OX=9606 GN=PGAM1 PE=1 SV=2	FDIC(BTD[C])FTSVQK EFDIC(BTD[C])FTSVQK AGYEFDIC(BTD[C])FTSVQK YEFDIC(BTD[C])FTSVQK|EFDIC(BTD[C])FTSVQK	5|2	0.94|1.09	1.015	0.10607	7	2
525	Q9BQG0	890	MYBBP1A	MBB1A_HUMAN Myb-binding protein 1A OS=Homo sapiens OX=9606 GN=MYBBP1A PE=1 SV=2	YC(BTD[C])HDLGER|	1|	1.01|	1.01	NA	1	1
526	P00558	367	PGK1	PGK1_HUMAN Phosphoglycerate kinase 1 OS=Homo sapiens OX=9606 GN=PGK1 PE=1 SV=3	GC(BTD[C])ITIIGGGDTATCCAK|	2|	1.01|	1.01	NA	2	1
527	P21333	478	FLNA	FLNA_HUMAN Filamin-A OS=Homo sapiens OX=9606 GN=FLNA PE=1 SV=4	|SPYTVTVGQAC(BTD[C])NPSACR	|1	|1.01	1.01	NA	1	1
528	Q99471	49	PFDN5	PFD5_HUMAN Prefoldin subunit 5 OS=Homo sapiens OX=9606 GN=PFDN5 PE=1 SV=2	|DC(BTD[C])LNVLNK	|1	|1.01	1.01	NA	1	1
529	P62316	63	SNRPD2	SMD2_HUMAN Small nuclear ribonucleoprotein Sm D2 OS=Homo sapiens OX=9606 GN=SNRPD2 PE=1 SV=1	HC(BTD[C])NMVLENVK|HC(BTD[C])NMVLENVK	5|6	1.04|0.97	1.005	0.0495	11	2
530	Q16719	22	KYNU	KYNU_HUMAN Kynureninase OS=Homo sapiens OX=9606 GN=KYNU PE=1 SV=1	ELKC(BTD[C])HPTDER AELKC(BTD[C])HPTDER AAELKC(BTD[C])HPTDER KC(BTD[C])HPTDER LKC(BTD[C])HPTDER|AAELKC(BTD[C])HPTDER IAAELKC(BTD[C])HPTDER KC(BTD[C])HPTDER LKC(BTD[C])HPTDER ELKC(BTD[C])HPTDER AELKC(BTD[C])HPTDER	19|10	1.06|0.945	1.0025	0.08132	29	2
531	Q96AG4	59	LRRC59	LRC59_HUMAN Leucine-rich repeat-containing protein 59 OS=Homo sapiens OX=9606 GN=LRRC59 PE=1 SV=1	LPSDFC(BTD[C])GLTHLVK TTLPSDFC(BTD[C])GLTHLVK|SDFC(BTD[C])GLTHLVK PSDFC(BTD[C])GLTHLVK DFC(BTD[C])GLTHLVK TTLPSDFC(BTD[C])GLTHLVK LTTLPSDFC(BTD[C])GLTHLVK	2|6	1.175|0.83	1.0025	0.24395	8	2
532	P17812	491	CTPS1	PYRG1_HUMAN CTP synthase 1 OS=Homo sapiens OX=9606 GN=CTPS1 PE=1 SV=2	KC(BTD[C])LEEQGLK|KC(BTD[C])LEEQGLK	4|3	1.01|0.99	1	0.01414	7	2
533	Q96EI5	34	TCEAL4	TCAL4_HUMAN Transcription elongation factor A protein-like 4 OS=Homo sapiens OX=9606 GN=TCEAL4 PE=1 SV=2	KPEVTC(BTD[C])TLEDK|	1|	1.0|	1	NA	1	1
534	Q9H6S3	317	EPS8L2	ES8L2_HUMAN Epidermal growth factor receptor kinase substrate 8-like protein 2 OS=Homo sapiens OX=9606 GN=EPS8L2 PE=1 SV=2	ARPPSEGEFIDC(BTD[C])FQK|	2|	1.0|	1	NA	2	1
535	P68036	86	UBE2L3	UB2L3_HUMAN Ubiquitin-conjugating enzyme E2 L3 OS=Homo sapiens OX=9606 GN=UBE2L3 PE=1 SV=1	GQVC(BTD[C])LPVISAENWKPATK|	2|	1.0|	1	NA	2	1	Active site
536	Q00610	870	CLTC	CLH1_HUMAN Clathrin heavy chain 1 OS=Homo sapiens OX=9606 GN=CLTC PE=1 SV=5	|IHEGC(BTD[C])EEPATHNALAK	|4	|0.995	0.995	NA	4	1
537	Q9UKD2	33	MRTO4	MRT4_HUMAN mRNA turnover protein 4 homolog OS=Homo sapiens OX=9606 GN=MRTO4 PE=1 SV=2	KC(BTD[C])VDTYK|KC(BTD[C])VDTYK	3|3	1.03|0.95	0.99	0.05657	6	2
538	P68371	12	TUBB4B	TBB4B_HUMAN Tubulin beta-4B chain OS=Homo sapiens OX=9606 GN=TUBB4B PE=1 SV=1	HIQAGQC(BTD[C])GNQIGAK AGQC(BTD[C])GNQIGAK VHIQAGQC(BTD[C])GNQIGAK IVHIQAGQC(BTD[C])GNQIGAK EIVHIQAGQC(BTD[C])GNQIGAK|	25|	0.99|	0.99	NA	25	1
539	P60981	23	DSTN	DEST_HUMAN Destrin OS=Homo sapiens OX=9606 GN=DSTN PE=1 SV=3	|KC(BTD[C])STPEEIK KC(BTD[C])STPEEIKK	|14	|0.99	0.99	NA	14	1
540	Q86VP6	940	CAND1	CAND1_HUMAN Cullin-associated NEDD8-dissociated protein 1 OS=Homo sapiens OX=9606 GN=CAND1 PE=1 SV=2	HC(BTD[C])ECAEEGTR|HC(BTD[C])ECAEEGTR	4|3	0.945|1.02	0.9825	0.05303	7	2
541	P47756	206	CAPZB	CAPZB_HUMAN F-actin-capping protein subunit beta OS=Homo sapiens OX=9606 GN=CAPZB PE=1 SV=4	DETVSDC(BTD[C])SPHIANIGR|DETVSDC(BTD[C])SPHIANIGR	2|1	0.97|0.99	0.98	0.01414	3	2
542	P17812	176	CTPS1	PYRG1_HUMAN CTP synthase 1 OS=Homo sapiens OX=9606 GN=CTPS1 PE=1 SV=2	ENFC(BTD[C])NIHVSLVPQPSSTGEQK|	1|	0.98|	0.98	NA	1	1
543	P30566	304	ADSL	PUR8_HUMAN Adenylosuccinate lyase OS=Homo sapiens OX=9606 GN=ADSL PE=1 SV=2	SERC(BTD[C])CSLAR|SERC(BTD[C])CSLAR	1|4	1.0|0.955	0.9775	0.03182	5	2
544	P38646	366	HSPA9	GRP75_HUMAN Stress-70 protein, mitochondrial OS=Homo sapiens OX=9606 GN=HSPA9 PE=1 SV=2	TIAPC(BTD[C])QK|	1|	0.97|	0.97	NA	1	1
545	P46821	261	MAP1B	MAP1B_HUMAN Microtubule-associated protein 1B OS=Homo sapiens OX=9606 GN=MAP1B PE=1 SV=2	KPC(BTD[C])CYIFPGGR SKPC(BTD[C])CYIFPGGR|	5|	0.97|	0.97	NA	5	1
546	P00367	376	GLUD1	DHE3_HUMAN Glutamate dehydrogenase 1, mitochondrial OS=Homo sapiens OX=9606 GN=GLUD1 PE=1 SV=2	AKPYEGSILEADC(BTD[C])DILIPAASEK|AKPYEGSILEADC(BTD[C])DILIPAASEK	1|1	0.9|1.04	0.97	0.09899	2	2
547	P29474	991	NOS3	NOS3_HUMAN Nitric oxide synthase, endothelial OS=Homo sapiens OX=9606 GN=NOS3 PE=1 SV=4	VPC(BTD[C])FLR|	1|	0.97|	0.97	NA	1	1
548	P62854	23	RPS26	RS26_HUMAN 40S ribosomal protein S26 OS=Homo sapiens OX=9606 GN=RPS26 PE=1 SV=3	QPIRC(BTD[C])TNCAR VQPIRC(BTD[C])TNCAR|	4|	0.965|	0.965	NA	4	1
549	O60841	1158	EIF5B	IF2P_HUMAN Eukaryotic translation initiation factor 5B OS=Homo sapiens OX=9606 GN=EIF5B PE=1 SV=4	KGQEVC(BTD[C])VK|KGQEVC(BTD[C])VK	3|2	0.93|0.99	0.96	0.04243	5	2
550	A1L0T0	176	ILVBL	ILVBL_HUMAN Acetolactate synthase-like protein OS=Homo sapiens OX=9606 GN=ILVBL PE=1 SV=2	FC(BTD[C])VSVR|	1|	0.96|	0.96	NA	1	1
551	Q9NQR4	44	NIT2	NIT2_HUMAN Omega-amidase NIT2 OS=Homo sapiens OX=9606 GN=NIT2 PE=1 SV=1	LPEC(BTD[C])FNSPYGAK|	1|	0.96|	0.96	NA	1	1
552	P13639	67	EEF2	EF2_HUMAN Elongation factor 2 OS=Homo sapiens OX=9606 GN=EEF2 PE=1 SV=4	KDEQERC(BTD[C])ITIK DEQERC(BTD[C])ITIK|KDEQERC(BTD[C])ITIK DEQERC(BTD[C])ITIK	4|3	0.855|1.06	0.9575	0.14496	7	2
553	P27816	635	MAP4	MAP4_HUMAN Microtubule-associated protein 4 OS=Homo sapiens OX=9606 GN=MAP4 PE=1 SV=3	KC(BTD[C])SLPAEEDSVLEK|KC(BTD[C])SLPAEEDSVLEK	1|2	1.0|0.91	0.955	0.06364	3	2
554	Q01469	47	FABP5	FABP5_HUMAN Fatty acid-binding protein 5 OS=Homo sapiens OX=9606 GN=FABP5 PE=1 SV=3	KPDCIITC(BTD[C])DGK AKPDCIITC(BTD[C])DGK|KPDCIITC(BTD[C])DGK	5|1	0.78|1.12	0.95	0.24042	6	2
555	Q8NEZ5	378	FBXO22	FBX22_HUMAN F-box only protein 22 OS=Homo sapiens OX=9606 GN=FBXO22 PE=1 SV=1	KC(BTD[C])NEVK|	1|	0.95|	0.95	NA	1	1
556	P08865	148	RPSA	RSSA_HUMAN 40S ribosomal protein SA OS=Homo sapiens OX=9606 GN=RPSA PE=1 SV=4	|ADHQPLTEASYVNLPTIALC(BTD[C])NTDSPLR	|1	|0.95	0.95	NA	1	1
557	P49588	773	AARS	SYAC_HUMAN Alanine--tRNA ligase, cytoplasmic OS=Homo sapiens OX=9606 GN=AARS PE=1 SV=2	KC(BTD[C])LSVMEAK|KC(BTD[C])LSVMEAK	1|4	0.98|0.91	0.945	0.0495	5	2
558	P34897	241	SHMT2	GLYM_HUMAN Serine hydroxymethyltransferase, mitochondrial OS=Homo sapiens OX=9606 GN=SHMT2 PE=1 SV=3	MREVC(BTD[C])DEVK|	1|	0.94|	0.94	NA	1	1
559	P54652	191	HSPA2	HSP72_HUMAN Heat shock-related 70 kDa protein 2 OS=Homo sapiens OX=9606 GN=HSPA2 PE=1 SV=1	GC(BTD[C])AGGEK KGC(BTD[C])AGGEK|KGC(BTD[C])AGGEK	3|3	0.8|1.07	0.935	0.19092	6	2
560	Q13501	113	SQSTM1	SQSTM_HUMAN Sequestosome-1 OS=Homo sapiens OX=9606 GN=SQSTM1 PE=1 SV=1	DHRPPC(BTD[C])AQEAPR|DHRPPC(BTD[C])AQEAPR	1|1	0.81|1.06	0.935	0.17678	2	2
561	P30519	265	HMOX2	HMOX2_HUMAN Heme oxygenase 2 OS=Homo sapiens OX=9606 GN=HMOX2 PE=1 SV=2	KC(BTD[C])PFYAAEQDK|KC(BTD[C])PFYAAEQDK	1|2	0.94|0.93	0.935	0.00707	3	2
562	P25789	34	PSMA4	PSA4_HUMAN Proteasome subunit alpha type-4 OS=Homo sapiens OX=9606 GN=PSMA4 PE=1 SV=1	EAIGHAGTC(BTD[C])LGILANDGVLLAAER|	2|	0.93|	0.93	NA	2	1
563	Q06323	101	PSME1	PSME1_HUMAN Proteasome activator complex subunit 1 OS=Homo sapiens OX=9606 GN=PSME1 PE=1 SV=1	|KGEDEDKGPPC(BTD[C])GPVNCNEK	|2	|0.93	0.93	NA	2	1
564	Q14980	80	NUMA1	NUMA1_HUMAN Nuclear mitotic apparatus protein 1 OS=Homo sapiens OX=9606 GN=NUMA1 PE=1 SV=2	HPSSPEC(BTD[C])LVSAQK|	1|	0.92|	0.92	NA	1	1
565	P15121	299	AKR1B1	ALDR_HUMAN Aldo-keto reductase family 1 member B1 OS=Homo sapiens OX=9606 GN=AKR1B1 PE=1 SV=3	VC(BTD[C])ALLSCTSHK|VC(BTD[C])ALLSCTSHK	2|2	1.11|0.73	0.92	0.2687	4	2
566	P56192	421	MARS	SYMC_HUMAN Methionine--tRNA ligase, cytoplasmic OS=Homo sapiens OX=9606 GN=MARS PE=1 SV=2	GDQCDKC(BTD[C])GK|	3|	0.92|	0.92	NA	3	1
567	Q14344	37	GNA13	GNA13_HUMAN Guanine nucleotide-binding protein subunit alpha-13 OS=Homo sapiens OX=9606 GN=GNA13 PE=1 SV=2	IDKC(BTD[C])LSR|	2|	0.91|	0.91	NA	2	1
568	P35579	671	MYH9	MYH9_HUMAN Myosin-9 OS=Homo sapiens OX=9606 GN=MYH9 PE=1 SV=4	C(BTD[C])IIPNHEK|C(BTD[C])IIPNHEK	2|3	0.98|0.84	0.91	0.09899	5	2
569	P30050	141	RPL12	RL12_HUMAN 60S ribosomal protein L12 OS=Homo sapiens OX=9606 GN=RPL12 PE=1 SV=1	EILGTAQSVGC(BTD[C])NVDGR|	1|	0.9|	0.9	NA	1	1
570	P13804	53	ETFA	ETFA_HUMAN Electron transfer flavoprotein subunit alpha, mitochondrial OS=Homo sapiens OX=9606 GN=ETFA PE=1 SV=1	GGEVSC(BTD[C])LVAGTK LGGEVSC(BTD[C])LVAGTK|	3|	0.9|	0.9	NA	3	1
571	P78527	478	PRKDC	PRKDC_HUMAN DNA-dependent protein kinase catalytic subunit OS=Homo sapiens OX=9606 GN=PRKDC PE=1 SV=3	|NC(BTD[C])ISTVVHQGLIR	|1	|0.89	0.89	NA	1	1
572	P07900	420	HSP90AA1	HS90A_HUMAN Heat shock protein HSP 90-alpha OS=Homo sapiens OX=9606 GN=HSP90AA1 PE=1 SV=5	|KC(BTD[C])LELFTELAEDKENYK	|2	|0.89	0.89	NA	2	1
573	P14625	138	HSP90B1	ENPL_HUMAN Endoplasmin OS=Homo sapiens OX=9606 GN=HSP90B1 PE=1 SV=1	IKC(BTD[C])DKEK|	3|	0.88|	0.88	NA	3	1	Disulfide bond
574	P51858	12	HDGF	HDGF_HUMAN Hepatoma-derived growth factor OS=Homo sapiens OX=9606 GN=HDGF PE=1 SV=1	KC(BTD[C])GDLVFAK YKC(BTD[C])GDLVFAK|YKC(BTD[C])GDLVFAK	3|1	0.88|0.86	0.87	0.01414	4	2	Disulfide bond
575	O75116	607	ROCK2	ROCK2_HUMAN Rho-associated protein kinase 2 OS=Homo sapiens OX=9606 GN=ROCK2 PE=1 SV=4	DLQDKNC(BTD[C])LLETAK|	1|	0.87|	0.87	NA	1	1
576	P40926	93	MDH2	MDHM_HUMAN Malate dehydrogenase, mitochondrial OS=Homo sapiens OX=9606 GN=MDH2 PE=1 SV=3	|GC(BTD[C])DVVVIPAGVPR	|2	|0.87	0.87	NA	2	1
577	Q06830	173	PRDX1	PRDX1_HUMAN Peroxiredoxin-1 OS=Homo sapiens OX=9606 GN=PRDX1 PE=1 SV=1	HGEVC(BTD[C])PAGWKPGSDTIKPDVQK|HGEVC(BTD[C])PAGWKPGSDTIKPDVQK	1|1	0.89|0.84	0.865	0.03536	2	2	Disulfide bond
578	P49327	1759	FASN	FAS_HUMAN Fatty acid synthase OS=Homo sapiens OX=9606 GN=FASN PE=1 SV=3	C(BTD[C])LATHGR|C(BTD[C])LATHGR	2|1	0.83|0.87	0.85	0.02828	3	2
579	P83731	6	RPL24	RL24_HUMAN 60S ribosomal protein L24 OS=Homo sapiens OX=9606 GN=RPL24 PE=1 SV=1	LC(BTD[C])SFSGYK|	1|	0.85|	0.85	NA	1	1
580	Q04828	193	AKR1C1	AK1C1_HUMAN Aldo-keto reductase family 1 member C1 OS=Homo sapiens OX=9606 GN=AKR1C1 PE=1 SV=1	|YKPVCNQVEC(BTD[C])HPYFNQR PVCNQVEC(BTD[C])HPYFNQR	|4	|0.85	0.85	NA	4	1
581	P53396	20	ACLY	ACLY_HUMAN ATP-citrate synthase OS=Homo sapiens OX=9606 GN=ACLY PE=1 SV=3	IC(BTD[C])TTSAIQNR|IC(BTD[C])TTSAIQNR	1|1	0.84|0.85	0.845	0.00707	2	2
582	P61619	13	SEC61A1	S61A1_HUMAN Protein transport protein Sec61 subunit alpha isoform 1 OS=Homo sapiens OX=9606 GN=SEC61A1 PE=1 SV=2	|EVIKPFC(BTD[C])VILPEIQKPER	|1	|0.84	0.84	NA	1	1
583	Q9ULV4	456	CORO1C	COR1C_HUMAN Coronin-1C OS=Homo sapiens OX=9606 GN=CORO1C PE=1 SV=1	SIKDTIC(BTD[C])NQDER|SIKDTIC(BTD[C])NQDER	1|2	0.7|0.97	0.835	0.19092	3	2
584	Q9H0S4	226	DDX47	DDX47_HUMAN Probable ATP-dependent RNA helicase DDX47 OS=Homo sapiens OX=9606 GN=DDX47 PE=1 SV=1	NPVKC(BTD[C])AVSSK|	1|	0.83|	0.83	NA	1	1
585	P63244	153	RACK1	RACK1_HUMAN Receptor of activated protein C kinase 1 OS=Homo sapiens OX=9606 GN=RACK1 PE=1 SV=3	YTVQDESHSEWVSC(BTD[C])VR|	1|	0.83|	0.83	NA	1	1
586	P00387	204	CYB5R3	NB5R3_HUMAN NADH-cytochrome b5 reductase 3 OS=Homo sapiens OX=9606 GN=CYB5R3 PE=1 SV=3	DPDDHTVC(BTD[C])HLLFANQTEK|	1|	0.83|	0.83	NA	1	1
587	O75175	14	CNOT3	CNOT3_HUMAN CCR4-NOT transcription complex subunit 3 OS=Homo sapiens OX=9606 GN=CNOT3 PE=1 SV=1	GEIDRC(BTD[C])LK|	1|	0.82|	0.82	NA	1	1
588	Q02878	44	RPL6	RL6_HUMAN 60S ribosomal protein L6 OS=Homo sapiens OX=9606 GN=RPL6 PE=1 SV=3	KPHC(BTD[C])SR|GKPHC(BTD[C])SR	1|2	0.57|1.04	0.805	0.33234	3	2
589	O60716	516	CTNND1	CTND1_HUMAN Catenin delta-1 OS=Homo sapiens OX=9606 GN=CTNND1 PE=1 SV=1	EPNEDC(BTD[C])KPR|	1|	0.8|	0.8	NA	1	1
590	P42330	193	AKR1C3	AK1C3_HUMAN Aldo-keto reductase family 1 member C3 OS=Homo sapiens OX=9606 GN=AKR1C3 PE=1 SV=4	YKPVCNQVEC(BTD[C])HPYFNR|	4|	0.8|	0.8	NA	4	1
591	Q9NVS9	156	PNPO	PNPO_HUMAN Pyridoxine-5'-phosphate oxidase OS=Homo sapiens OX=9606 GN=PNPO PE=1 SV=1	LPEEEAEC(BTD[C])YFHSR|LPEEEAEC(BTD[C])YFHSR	2|1	0.86|0.73	0.795	0.09192	3	2
592	Q01469	43	FABP5	FABP5_HUMAN Fatty acid-binding protein 5 OS=Homo sapiens OX=9606 GN=FABP5 PE=1 SV=3	AKPDC(BTD[C])IITCDGK KPDC(BTD[C])IITCDGK|KPDC(BTD[C])IITCDGK	4|4	0.79|0.78	0.785	0.00707	8	2
593	Q12788	696	TBL3	TBL3_HUMAN Transducin beta-like protein 3 OS=Homo sapiens OX=9606 GN=TBL3 PE=1 SV=2	RDPEAC(BTD[C])EK|	1|	0.77|	0.77	NA	1	1
594	P54136	32	RARS	SYRC_HUMAN Arginine--tRNA ligase, cytoplasmic OS=Homo sapiens OX=9606 GN=RARS PE=1 SV=2	LKNC(BTD[C])GCLGASPNLEQLQEENLK|	2|	0.77|	0.77	NA	2	1
595	P60903	62	S100A10	S10AA_HUMAN Protein S100-A10 OS=Homo sapiens OX=9606 GN=S100A10 PE=1 SV=2	KDLDQC(BTD[C])R DLDQC(BTD[C])R|KDLDQC(BTD[C])R	2|1	0.955|0.58	0.7675	0.26517	3	2
596	Q14566	180	MCM6	MCM6_HUMAN DNA replication licensing factor MCM6 OS=Homo sapiens OX=9606 GN=MCM6 PE=1 SV=1	YTQPNIC(BTD[C])R|	1|	0.76|	0.76	NA	1	1
597	P15880	229	RPS2	RS2_HUMAN 40S ribosomal protein S2 OS=Homo sapiens OX=9606 GN=RPS2 PE=1 SV=2	GC(BTD[C])TATLGNFAK|	3|	0.75|	0.75	NA	3	1
598	P40818	175	USP8	UBP8_HUMAN Ubiquitin carboxyl-terminal hydrolase 8 OS=Homo sapiens OX=9606 GN=USP8 PE=1 SV=1	NEKC(BTD[C])ETK|	1|	0.75|	0.75	NA	1	1
599	Q14847	32	LASP1	LASP1_HUMAN LIM and SH3 domain protein 1 OS=Homo sapiens OX=9606 GN=LASP1 PE=1 SV=2	HC(BTD[C])ETCK|	1|	0.75|	0.75	NA	1	1
600	P60059	25	SEC61G	SC61G_HUMAN Protein transport protein Sec61 subunit gamma OS=Homo sapiens OX=9606 GN=SEC61G PE=1 SV=1	|RC(BTD[C])TKPDR	|1	|0.72	0.72	NA	1	1
601	Q8IUC4	25	RHPN2	RHPN2_HUMAN Rhophilin-2 OS=Homo sapiens OX=9606 GN=RHPN2 PE=1 SV=1	KGC(BTD[C])NPLAQTGR|	1|	0.66|	0.66	NA	1	1
602	Q02790	103	FKBP4	FKBP4_HUMAN Peptidyl-prolyl cis-trans isomerase FKBP4 OS=Homo sapiens OX=9606 GN=FKBP4 PE=1 SV=3	VGEVC(BTD[C])HITCKPEYAYGSAGSPPK|VGEVC(BTD[C])HITCKPEYAYGSAGSPPK	3|2	0.65|0.635	0.6425	0.01061	5	2
603	Q06323	22	PSME1	PSME1_HUMAN Proteasome activator complex subunit 1 OS=Homo sapiens OX=9606 GN=PSME1 PE=1 SV=1	FREDLC(BTD[C])TK|	1|	0.64|	0.64	NA	1	1
604	Q8TDN6	52	BRIX1	BRX1_HUMAN Ribosome biogenesis protein BRX1 homolog OS=Homo sapiens OX=9606 GN=BRIX1 PE=1 SV=2	PGPVC(BTD[C])K|PGPVC(BTD[C])K	1|1	0.43|0.85	0.64	0.29698	2	2
605	Q9BYT8	458	NLN	NEUL_HUMAN Neurolysin, mitochondrial OS=Homo sapiens OX=9606 GN=NLN PE=1 SV=1	YNHAACFGLQPGC(BTD[C])LLPDGSR|	1|	0.61|	0.61	NA	1	1
606	O15270	511	SPTLC2	SPTC2_HUMAN Serine palmitoyltransferase 2 OS=Homo sapiens OX=9606 GN=SPTLC2 PE=1 SV=1	FC(BTD[C])LSAAHTK|	1|	0.6|	0.6	NA	1	1
607	O00411	413	POLRMT	RPOM_HUMAN DNA-directed RNA polymerase, mitochondrial OS=Homo sapiens OX=9606 GN=POLRMT PE=1 SV=2	VC(BTD[C])VVSVEKPTLPSK|	1|	0.6|	0.6	NA	1	1
608	P54652	606	HSPA2	HSP72_HUMAN Heat shock-related 70 kDa protein 2 OS=Homo sapiens OX=9606 GN=HSPA2 PE=1 SV=1	VC(BTD[C])NPIISK|	1|	0.58|	0.58	NA	1	1
609	P13804	60	ETFA	ETFA_HUMAN Electron transfer flavoprotein subunit alpha, mitochondrial OS=Homo sapiens OX=9606 GN=ETFA PE=1 SV=1	LGGEVSCLVAGTKC(BTD[C])DK|	1|	0.52|	0.52	NA	1	1
610	Q16643	96	DBN1	DREB_HUMAN Drebrin OS=Homo sapiens OX=9606 GN=DBN1 PE=1 SV=4	KC(BTD[C])ACASHVAK|	1|	0.52|	0.52	NA	1	1
611	P62987	115	UBA52	RL40_HUMAN Ubiquitin-60S ribosomal protein L40 OS=Homo sapiens OX=9606 GN=UBA52 PE=1 SV=2	C(BTD[C])GHTNNLRPK|	1|	0.49|	0.49	NA	1	1
612	P04406	152	GAPDH	G3P_HUMAN Glyceraldehyde-3-phosphate dehydrogenase OS=Homo sapiens OX=9606 GN=GAPDH PE=1 SV=3	IISNASC(BTD[C])TTNCLAPLAK|IISNASC(BTD[C])TTNCLAPLAK	1|2	0.46|0.34	0.4	0.08485	3	2	Active site, Modified residue, Modified residue, Modified residue, Modified residue
613	Q9Y490	1661	TLN1	TLN1_HUMAN Talin-1 OS=Homo sapiens OX=9606 GN=TLN1 PE=1 SV=3	|DKAPGQLEC(BTD[C])ETAIAALNSCLR	|1	|0.4	0.4	NA	1	1

## Sheet: BIM-IX
Rank	Leading AC	Site	Genename	Description	Modified sequences	Spectrum count	All ratio	Ratio average	Ratio SD	Total spectrum count	Repeat counts	Function annotation
1	P60981	135	DSTN	DEST_HUMAN Destrin OS=Homo sapiens OX=9606 GN=DSTN PE=1 SV=3	HEC(BTD[C])QANGPEDLNR|	2|	3.175|	3.175	NA	2	1
2	Q9Y3E7	60	CHMP3	CHMP3_HUMAN Charged multivesicular body protein 3 OS=Homo sapiens OX=9606 GN=CHMP3 PE=1 SV=3	VC(BTD[C])IVLAK|	1|	2.99|	2.99	NA	1	1
3	Q9UKD2	33	MRTO4	MRT4_HUMAN mRNA turnover protein 4 homolog OS=Homo sapiens OX=9606 GN=MRTO4 PE=1 SV=2	|KC(BTD[C])VDTYK	|1	|2.96	2.96	NA	1	1
4	Q9BXJ9	309	NAA15	NAA15_HUMAN N-alpha-acetyltransferase 15, NatA auxiliary subunit OS=Homo sapiens OX=9606 GN=NAA15 PE=1 SV=1	FKEC(BTD[C])LDK|FKEC(BTD[C])LDK	1|1	2.91|2.94	2.925	0.02121	2	2
5	Q00610	736	CLTC	CLH1_HUMAN Clathrin heavy chain 1 OS=Homo sapiens OX=9606 GN=CLTC PE=1 SV=5	YIQAAC(BTD[C])K|	1|	2.92|	2.92	NA	1	1
6	Q00341	566	HDLBP	VIGLN_HUMAN Vigilin OS=Homo sapiens OX=9606 GN=HDLBP PE=1 SV=2	NEVEKC(BTD[C])TK|NEVEKC(BTD[C])TK	2|2	2.88|2.91	2.895	0.02121	4	2
7	Q8IY17	991	PNPLA6	PLPL6_HUMAN Neuropathy target esterase OS=Homo sapiens OX=9606 GN=PNPLA6 PE=1 SV=3	GC(BTD[C])SHIGVLK|	2|	2.82|	2.82	NA	2	1
8	P15121	187	AKR1B1	ALDR_HUMAN Aldo-keto reductase family 1 member B1 OS=Homo sapiens OX=9606 GN=AKR1B1 PE=1 SV=3	YKPAVNQIEC(BTD[C])HPYLTQEK PAVNQIEC(BTD[C])HPYLTQEK|YKPAVNQIEC(BTD[C])HPYLTQEK PAVNQIEC(BTD[C])HPYLTQEK	6|4	2.79|2.765	2.7775	0.01768	10	2
9	P04083	263	ANXA1	ANXA1_HUMAN Annexin A1 OS=Homo sapiens OX=9606 GN=ANXA1 PE=1 SV=2	GDIEKC(BTD[C])LTAIVK|GDIEKC(BTD[C])LTAIVK	1|4	3.05|2.505	2.7775	0.38537	5	2
10	Q00610	491	CLTC	CLH1_HUMAN Clathrin heavy chain 1 OS=Homo sapiens OX=9606 GN=CLTC PE=1 SV=5	VIQC(BTD[C])FAETGQVQK|	1|	2.77|	2.77	NA	1	1
11	P52209	170	PGD	6PGD_HUMAN 6-phosphogluconate dehydrogenase, decarboxylating OS=Homo sapiens OX=9606 GN=PGD PE=1 SV=3	|VGTGEPC(BTD[C])CDWVGDEGAGHFVK	|1	|2.76	2.76	NA	1	1
12	P42330	193	AKR1C3	AK1C3_HUMAN Aldo-keto reductase family 1 member C3 OS=Homo sapiens OX=9606 GN=AKR1C3 PE=1 SV=4	YKPVCNQVEC(BTD[C])HPYFNR PVCNQVEC(BTD[C])HPYFNR|	2|	2.75|	2.75	NA	2	1
13	P05198	98	EIF2S1	IF2A_HUMAN Eukaryotic translation initiation factor 2 subunit 1 OS=Homo sapiens OX=9606 GN=EIF2S1 PE=1 SV=3	|VSPEEAIKC(BTD[C])EDK	|1	|2.71	2.71	NA	1	1
14	Q9UBE0	146	SAE1	SAE1_HUMAN SUMO-activating enzyme subunit 1 OS=Homo sapiens OX=9606 GN=SAE1 PE=1 SV=1	VDQIC(BTD[C])HK|	1|	2.63|	2.63	NA	1	1
15	P83111	154	LACTB	LACTB_HUMAN Serine beta-lactamase-like protein LACTB, mitochondrial OS=Homo sapiens OX=9606 GN=LACTB PE=1 SV=2	VPC(BTD[C])KPETVMR|VPC(BTD[C])KPETVMR	4|3	2.535|2.67	2.6025	0.09546	7	2
16	O60218	45	AKR1B10	AK1BA_HUMAN Aldo-keto reductase family 1 member B10 OS=Homo sapiens OX=9606 GN=AKR1B10 PE=1 SV=2	HIDC(BTD[C])AYVYQNEHEVGEAIQEK|DC(BTD[C])AYVYQNEHEVGEAIQEK	1|1	1.94|3.13	2.535	0.84146	2	2
17	Q13619	483	CUL4A	CUL4A_HUMAN Cullin-4A OS=Homo sapiens OX=9606 GN=CUL4A PE=1 SV=3	HEC(BTD[C])GAAFTSK|HEC(BTD[C])GAAFTSK	2|1	2.21|2.83	2.52	0.43841	3	2
18	Q9Y490	1927	TLN1	TLN1_HUMAN Talin-1 OS=Homo sapiens OX=9606 GN=TLN1 PE=1 SV=3	|VQELGHGC(BTD[C])AALVTK	|1	|2.5	2.5	NA	1	1
19	P35270	10	SPR	SPRE_HUMAN Sepiapterin reductase OS=Homo sapiens OX=9606 GN=SPR PE=1 SV=1	VC(BTD[C])LLTGASR|VC(BTD[C])LLTGASR	1|1	2.84|2.12	2.48	0.50912	2	2
20	P51991	196	HNRNPA3	ROA3_HUMAN Heterogeneous nuclear ribonucleoprotein A3 OS=Homo sapiens OX=9606 GN=HNRNPA3 PE=1 SV=2	YHTINGHNC(BTD[C])EVK|	1|	2.45|	2.45	NA	1	1
21	P11216	758	PYGB	PYGB_HUMAN Glycogen phosphorylase, brain form OS=Homo sapiens OX=9606 GN=PYGB PE=1 SV=5	EPDC(BTD[C])FK|	1|	2.45|	2.45	NA	1	1
22	P36551	373	CPOX	HEM6_HUMAN Oxygen-dependent coproporphyrinogen-III oxidase, mitochondrial OS=Homo sapiens OX=9606 GN=CPOX PE=1 SV=3	|KHC(BTD[C])DDSFTPQEK	|1	|2.43	2.43	NA	1	1
23	P40227	282	CCT6A	TCPZ_HUMAN T-complex protein 1 subunit zeta OS=Homo sapiens OX=9606 GN=CCT6A PE=1 SV=3	KVC(BTD[C])GDSDK|KVC(BTD[C])GDSDK	1|2	2.44|2.36	2.4	0.05657	3	2
24	Q9NZB2	53	FAM120A	F120A_HUMAN Constitutive coactivator of PPAR-gamma-like protein 1 OS=Homo sapiens OX=9606 GN=FAM120A PE=1 SV=2	VDADNC(BTD[C])LHR|	1|	2.37|	2.37	NA	1	1
25	P17844	354	DDX5	DDX5_HUMAN Probable ATP-dependent RNA helicase DDX5 OS=Homo sapiens OX=9606 GN=DDX5 PE=1 SV=1	|RRC(BTD[C])DELTR RC(BTD[C])DELTR	|2	|2.37	2.37	NA	2	1
26	P60900	47	PSMA6	PSA6_HUMAN Proteasome subunit alpha type-6 OS=Homo sapiens OX=9606 GN=PSMA6 PE=1 SV=1	GKDC(BTD[C])AVIVTQK|GKDC(BTD[C])AVIVTQK	2|2	2.37|2.335	2.3525	0.02475	4	2
27	P09874	256	PARP1	PARP1_HUMAN Poly [ADP-ribose] polymerase 1 OS=Homo sapiens OX=9606 GN=PARP1 PE=1 SV=4	|KVC(BTD[C])STNDLK	|1	|2.32	2.32	NA	1	1
28	Q2TAY7	416	SMU1	SMU1_HUMAN WD40 repeat-containing protein SMU1 OS=Homo sapiens OX=9606 GN=SMU1 PE=1 SV=2	NPEHFVVC(BTD[C])NR|	2|	2.31|	2.31	NA	2	1
29	Q49AS3	64	LRRC37A5P	L37A5_HUMAN Putative protein LRRC37A5P OS=Homo sapiens OX=9606 GN=LRRC37A5P PE=5 SV=3	QLAC(BTD[C])AK|	1|	2.3|	2.3	NA	1	1
30	P40227	366	CCT6A	TCPZ_HUMAN T-complex protein 1 subunit zeta OS=Homo sapiens OX=9606 GN=CCT6A PE=1 SV=3	FTFIEKC(BTD[C])NNPR|	1|	2.29|	2.29	NA	1	1
31	Q99729	224	HNRNPAB	ROAA_HUMAN Heterogeneous nuclear ribonucleoprotein A/B OS=Homo sapiens OX=9606 GN=HNRNPAB PE=1 SV=2	FHTVSGSKC(BTD[C])EIK|	1|	2.28|	2.28	NA	1	1
32	Q9H6S3	317	EPS8L2	ES8L2_HUMAN Epidermal growth factor receptor kinase substrate 8-like protein 2 OS=Homo sapiens OX=9606 GN=EPS8L2 PE=1 SV=2	ARPPSEGEFIDC(BTD[C])FQK|	1|	2.26|	2.26	NA	1	1
33	O75390	211	CS	CISY_HUMAN Citrate synthase, mitochondrial OS=Homo sapiens OX=9606 GN=CS PE=1 SV=2	LPC(BTD[C])VAAK|LPC(BTD[C])VAAK	3|1	2.35|2.15	2.25	0.14142	4	2
34	P55036	37	PSMD4	PSMD4_HUMAN 26S proteasome non-ATPase regulatory subunit 4 OS=Homo sapiens OX=9606 GN=PSMD4 PE=1 SV=1	LQAQQDAVNIVC(BTD[C])HSK|	1|	2.23|	2.23	NA	1	1
35	P15121	45	AKR1B1	ALDR_HUMAN Aldo-keto reductase family 1 member B1 OS=Homo sapiens OX=9606 GN=AKR1B1 PE=1 SV=3	HIDC(BTD[C])AHVYQNENEVGVAIQEK|HIDC(BTD[C])AHVYQNENEVGVAIQEK IDC(BTD[C])AHVYQNENEVGVAIQEK	1|3	2.24|2.21	2.225	0.02121	4	2
36	P18206	737	VCL	VINC_HUMAN Vinculin OS=Homo sapiens OX=9606 GN=VCL PE=1 SV=4	|DLDKC(BTD[C])K	|2	|2.225	2.225	NA	2	1
37	P43034	252	PAFAH1B1	LIS1_HUMAN Platelet-activating factor acetylhydrolase IB subunit alpha OS=Homo sapiens OX=9606 GN=PAFAH1B1 PE=1 SV=2	MVRPNQDGTLIASC(BTD[C])SNDQTVR|	1|	2.21|	2.21	NA	1	1
38	Q00610	1205	CLTC	CLH1_HUMAN Clathrin heavy chain 1 OS=Homo sapiens OX=9606 GN=CLTC PE=1 SV=5	LAELEEFINGPNNAHIQQVGDRC(BTD[C])YDEK|	1|	2.2|	2.2	NA	1	1
39	O75367	297	H2AFY	H2AY_HUMAN Core histone macro-H2A.1 OS=Homo sapiens OX=9606 GN=H2AFY PE=1 SV=4	NC(BTD[C])LALADDKK|NC(BTD[C])LALADDKK	1|1	1.97|2.38	2.175	0.28991	2	2
40	P14618	31	PKM	KPYM_HUMAN Pyruvate kinase PKM OS=Homo sapiens OX=9606 GN=PKM PE=1 SV=4	LEHMC(BTD[C])R ADTFLEHMC(BTD[C])R AAMADTFLEHMC(BTD[C])R FLEHMC(BTD[C])R DTFLEHMC(BTD[C])R|LEHMC(BTD[C])R ADTFLEHMC(BTD[C])R MADTFLEHMC(BTD[C])R AAMADTFLEHMC(BTD[C])R	19|10	2.16|2.175	2.1675	0.01061	29	2
41	P63104	25	YWHAZ	1433Z_HUMAN 14-3-3 protein zeta/delta OS=Homo sapiens OX=9606 GN=YWHAZ PE=1 SV=1	YDDMAAC(BTD[C])MK|	2|	2.16|	2.16	NA	2	1
42	Q9Y490	2408	TLN1	TLN1_HUMAN Talin-1 OS=Homo sapiens OX=9606 GN=TLN1 PE=1 SV=3	|MVAAATNNLC(BTD[C])EAANAAVQGHASQEK	|1	|2.16	2.16	NA	1	1
43	P00352	186	ALDH1A1	AL1A1_HUMAN Retinal dehydrogenase 1 OS=Homo sapiens OX=9606 GN=ALDH1A1 PE=1 SV=2	IGPALSC(BTD[C])GNTVVVK IGPALSC(BTD[C])GNTVVVKPAEQTPLTALHVASLIK|IGPALSC(BTD[C])GNTVVVK	2|2	2.0|2.295	2.1475	0.2086	4	2
44	Q13616	291	CUL1	CUL1_HUMAN Cullin-1 OS=Homo sapiens OX=9606 GN=CUL1 PE=1 SV=2	KC(BTD[C])EQVLIEK|KC(BTD[C])EQVLIEK	1|1	2.29|2.0	2.145	0.20506	2	2
45	Q16658	89	FSCN1	FSCN1_HUMAN Fascin OS=Homo sapiens OX=9606 GN=FSCN1 PE=1 SV=3	PGPDC(BTD[C])R|PGPDC(BTD[C])R	2|1	1.345|2.9	2.1225	1.09955	3	2
46	P14174	60	MIF	MIF_HUMAN Macrophage migration inhibitory factor OS=Homo sapiens OX=9606 GN=MIF PE=1 SV=4	|LC(BTD[C])SLHSIGK GGSSEPCALC(BTD[C])SLHSIGK	|3	|2.12	2.12	NA	3	1
47	Q13011	159	ECH1	ECH1_HUMAN Delta(3,5)-Delta(2,4)-dienoyl-CoA isomerase, mitochondrial OS=Homo sapiens OX=9606 GN=ECH1 PE=1 SV=2	|YQETFNVIERC(BTD[C])PK	|1	|2.12	2.12	NA	1	1
48	Q9Y5X3	227	SNX5	SNX5_HUMAN Sorting nexin-5 OS=Homo sapiens OX=9606 GN=SNX5 PE=1 SV=1	IKDSC(BTD[C])VK|	2|	2.09|	2.09	NA	2	1
49	P62942	23	FKBP1A	FKB1A_HUMAN Peptidyl-prolyl cis-trans isomerase FKBP1A OS=Homo sapiens OX=9606 GN=FKBP1A PE=1 SV=2	GQTC(BTD[C])VVHYTGMLEDGK|	2|	2.09|	2.09	NA	2	1
50	P49720	19	PSMB3	PSB3_HUMAN Proteasome subunit beta type-3 OS=Homo sapiens OX=9606 GN=PSMB3 PE=1 SV=2	GKNC(BTD[C])VAIAADR|KNC(BTD[C])VAIAADR GKNC(BTD[C])VAIAADR	1|4	2.08|2.095	2.0875	0.01061	5	2
51	Q9Y265	49	RUVBL1	RUVB1_HUMAN RuvB-like 1 OS=Homo sapiens OX=9606 GN=RUVBL1 PE=1 SV=1	|AC(BTD[C])GVIVELIK	|1	|2.08	2.08	NA	1	1
52	P16152	150	CBR1	CBR1_HUMAN Carbonyl reductase [NADPH] 1 OS=Homo sapiens OX=9606 GN=CBR1 PE=1 SV=3	SC(BTD[C])SPELQQK|SC(BTD[C])SPELQQK	2|2	2.38|1.745	2.0625	0.44901	4	2
53	Q6ZW61	426	BBS12	BBS12_HUMAN Bardet-Biedl syndrome 12 protein OS=Homo sapiens OX=9606 GN=BBS12 PE=1 SV=2	LIEKC(BTD[C])INSK|	2|	2.04|	2.04	NA	2	1
54	O14880	56	MGST3	MGST3_HUMAN Microsomal glutathione S-transferase 3 OS=Homo sapiens OX=9606 GN=MGST3 PE=1 SV=1	STDPENGHIFNC(BTD[C])IQR|	1|	2.03|	2.03	NA	1	1
55	P52272	114	HNRNPM	HNRPM_HUMAN Heterogeneous nuclear ribonucleoprotein M OS=Homo sapiens OX=9606 GN=HNRNPM PE=1 SV=3	GC(BTD[C])AVVEFK|GC(BTD[C])AVVEFK	1|1	2.32|1.74	2.03	0.41012	2	2
56	Q9H8S9	109	MOB1A	MOB1A_HUMAN MOB kinase activator 1A OS=Homo sapiens OX=9606 GN=MOB1A PE=1 SV=4	|PIKC(BTD[C])SAPK	|1	|2.03	2.03	NA	1	1
57	Q96DG6	121	CMBL	CMBL_HUMAN Carboxymethylenebutenolidase homolog OS=Homo sapiens OX=9606 GN=CMBL PE=1 SV=1	|QQC(BTD[C])HAQK	|1	|2.02	2.02	NA	1	1
58	P49773	84	HINT1	HINT1_HUMAN Histidine triad nucleotide-binding protein 1 OS=Homo sapiens OX=9606 GN=HINT1 PE=1 SV=2	KC(BTD[C])AADLGLNK|KC(BTD[C])AADLGLNK	2|5	2.0|2.02	2.01	0.01414	7	2
59	P21108	284	PRPS1L1	PRPS3_HUMAN Ribose-phosphate pyrophosphokinase 3 OS=Homo sapiens OX=9606 GN=PRPS1L1 PE=1 SV=2	MKHC(BTD[C])SK|MKHC(BTD[C])SK	1|1	1.58|2.44	2.01	0.60811	2	2
60	P00558	99	PGK1	PGK1_HUMAN Phosphoglycerate kinase 1 OS=Homo sapiens OX=9606 GN=PGK1 PE=1 SV=3	DC(BTD[C])VGPEVEK|DC(BTD[C])VGPEVEK DVLFLKDC(BTD[C])VGPEVEK	2|2	2.195|1.795	1.995	0.28284	4	2
61	P07237	343	P4HB	PDIA1_HUMAN Protein disulfide-isomerase OS=Homo sapiens OX=9606 GN=P4HB PE=1 SV=3	ITEFC(BTD[C])HR|ITEFC(BTD[C])HR	2|3	1.825|2.16	1.9925	0.23688	5	2
62	Q16401	412	PSMD5	PSMD5_HUMAN 26S proteasome non-ATPase regulatory subunit 5 OS=Homo sapiens OX=9606 GN=PSMD5 PE=1 SV=3	GISSQPFPELHC(BTD[C])AALK|	1|	1.99|	1.99	NA	1	1
63	P23141	274	CES1	EST1_HUMAN Liver carboxylesterase 1 OS=Homo sapiens OX=9606 GN=CES1 PE=1 SV=2	KGDVKPLAEQIAITAGC(BTD[C])K|KGDVKPLAEQIAITAGC(BTD[C])K	1|1	2.08|1.88	1.98	0.14142	2	2	Disulfide bond
64	Q15365	158	PCBP1	PCBP1_HUMAN Poly(rC)-binding protein 1 OS=Homo sapiens OX=9606 GN=PCBP1 PE=1 SV=2	AITIAGVPQSVTEC(BTD[C])VK|AITIAGVPQSVTEC(BTD[C])VK	1|1	1.29|2.66	1.975	0.96874	2	2
65	P46060	152	RANGAP1	RAGP1_HUMAN Ran GTPase-activating protein 1 OS=Homo sapiens OX=9606 GN=RANGAP1 PE=1 SV=1	LNNC(BTD[C])GMGIGGGK|	1|	1.97|	1.97	NA	1	1
66	P42330	188	AKR1C3	AK1C3_HUMAN Aldo-keto reductase family 1 member C3 OS=Homo sapiens OX=9606 GN=AKR1C3 PE=1 SV=4	|YKPVC(BTD[C])NQVECHPYFNR	|1	|1.96	1.96	NA	1	1
67	Q14019	10	COTL1	COTL1_HUMAN Coactosin-like protein OS=Homo sapiens OX=9606 GN=COTL1 PE=1 SV=3	IDKEAC(BTD[C])R|IDKEAC(BTD[C])R	1|2	1.85|2.055	1.9525	0.14496	3	2
68	Q96AT9	217	RPE	RPE_HUMAN Ribulose-phosphate 3-epimerase OS=Homo sapiens OX=9606 GN=RPE PE=1 SV=1	NVC(BTD[C])SEAAQK|	1|	1.95|	1.95	NA	1	1
69	P00352	50	ALDH1A1	AL1A1_HUMAN Retinal dehydrogenase 1 OS=Homo sapiens OX=9606 GN=ALDH1A1 PE=1 SV=2	PVFNPATEEELC(BTD[C])QVEEGDKEDVDK KFPVFNPATEEELC(BTD[C])QVEEGDKEDVDK|PVFNPATEEELC(BTD[C])QVEEGDKEDVDK KFPVFNPATEEELC(BTD[C])QVEEGDKEDVDK FPVFNPATEEELC(BTD[C])QVEEGDKEDVDK	3|5	1.62|2.28	1.95	0.46669	8	2
70	Q15084	58	PDIA6	PDIA6_HUMAN Protein disulfide-isomerase A6 OS=Homo sapiens OX=9606 GN=PDIA6 PE=1 SV=1	APWCGHC(BTD[C])QR|APWCGHC(BTD[C])QR	1|1	1.75|2.11	1.93	0.25456	2	2	Active site, Disulfide bond
71	P53396	633	ACLY	ACLY_HUMAN ATP-citrate synthase OS=Homo sapiens OX=9606 GN=ACLY PE=1 SV=3	|GVTIIGPATVGGIKPGC(BTD[C])FK	|1	|1.93	1.93	NA	1	1
72	P78417	192	GSTO1	GSTO1_HUMAN Glutathione S-transferase omega-1 OS=Homo sapiens OX=9606 GN=GSTO1 PE=1 SV=2	LNEC(BTD[C])VDHTPK|LNEC(BTD[C])VDHTPK	2|3	2.12|1.73	1.925	0.27577	5	2
73	Q16576	166	RBBP7	RBBP7_HUMAN Histone-binding protein RBBP7 OS=Homo sapiens OX=9606 GN=RBBP7 PE=1 SV=1	HPAKPDPSGEC(BTD[C])NPDLR|HPAKPDPSGEC(BTD[C])NPDLR	1|1	1.98|1.86	1.92	0.08485	2	2
74	Q5VW32	323	BROX	BROX_HUMAN BRO1 domain-containing protein BROX OS=Homo sapiens OX=9606 GN=BROX PE=1 SV=1	NTLEKC(BTD[C])QR|	2|	1.91|	1.91	NA	2	1
75	O43143	750	DHX15	DHX15_HUMAN Pre-mRNA-splicing factor ATP-dependent RNA helicase DHX15 OS=Homo sapiens OX=9606 GN=DHX15 PE=1 SV=2	TC(BTD[C])TDIKPEWLVK|TC(BTD[C])TDIKPEWLVK	1|1	1.9|1.92	1.91	0.01414	2	2
76	P60174	164	TPI1	TPIS_HUMAN Triosephosphate isomerase OS=Homo sapiens OX=9606 GN=TPI1 PE=1 SV=3	VAHALAEGLGVIAC(BTD[C])IGEK|VAHALAEGLGVIAC(BTD[C])IGEK	3|3	1.86|1.96	1.91	0.07071	6	2
77	P18206	1040	VCL	VINC_HUMAN Vinculin OS=Homo sapiens OX=9606 GN=VCL PE=1 SV=4	QC(BTD[C])TDKR|	1|	1.91|	1.91	NA	1	1
78	P00338	131	LDHA	LDHA_HUMAN L-lactate dehydrogenase A chain OS=Homo sapiens OX=9606 GN=LDHA PE=1 SV=2	YSPNC(BTD[C])K|YSPNC(BTD[C])K	3|1	1.91|1.9	1.905	0.00707	4	2
79	Q9Y490	1087	TLN1	TLN1_HUMAN Talin-1 OS=Homo sapiens OX=9606 GN=TLN1 PE=1 SV=3	LKPLPGETMEKC(BTD[C])TQDLGNSTK|LKPLPGETMEKC(BTD[C])TQDLGNSTK	2|1	1.8|2.01	1.905	0.14849	3	2
80	P49327	1828	FASN	FAS_HUMAN Fatty acid synthase OS=Homo sapiens OX=9606 GN=FASN PE=1 SV=3	DGVVRPLKC(BTD[C])TVFHGAQVEDAFR|	1|	1.9|	1.9	NA	1	1
81	Q7LBR1	25	CHMP1B	CHM1B_HUMAN Charged multivesicular body protein 1b OS=Homo sapiens OX=9606 GN=CHMP1B PE=1 SV=1	KC(BTD[C])DKEEK|KC(BTD[C])DKEEK	1|1	1.53|2.27	1.9	0.52326	2	2
82	P13797	463	PLS3	PLST_HUMAN Plastin-3 OS=Homo sapiens OX=9606 GN=PLS3 PE=1 SV=4	KIENC(BTD[C])NYAVELGK|KIENC(BTD[C])NYAVELGK	2|1	2.04|1.73	1.885	0.2192	3	2
83	Q04828	87	AKR1C1	AK1C1_HUMAN Aldo-keto reductase family 1 member C1 OS=Homo sapiens OX=9606 GN=AKR1C1 PE=1 SV=1	LWC(BTD[C])NSHRPELVR|LWC(BTD[C])NSHRPELVR	2|1	2.2|1.54	1.87	0.46669	3	2
84	P00558	50	PGK1	PGK1_HUMAN Phosphoglycerate kinase 1 OS=Homo sapiens OX=9606 GN=PGK1 PE=1 SV=3	FC(BTD[C])LDNGAK|	1|	1.87|	1.87	NA	1	1
85	Q16719	22	KYNU	KYNU_HUMAN Kynureninase OS=Homo sapiens OX=9606 GN=KYNU PE=1 SV=1	AELKC(BTD[C])HPTDER AAELKC(BTD[C])HPTDER IAAELKC(BTD[C])HPTDER KC(BTD[C])HPTDER LKC(BTD[C])HPTDER|LKC(BTD[C])HPTDER AAELKC(BTD[C])HPTDER IAAELKC(BTD[C])HPTDER KC(BTD[C])HPTDER	10|7	1.89|1.83	1.86	0.04243	17	2
86	P31943	122	HNRNPH1	HNRH1_HUMAN Heterogeneous nuclear ribonucleoprotein H OS=Homo sapiens OX=9606 GN=HNRNPH1 PE=1 SV=4	GLPFGC(BTD[C])SK|	1|	1.86|	1.86	NA	1	1
87	Q12965	1056	MYO1E	MYO1E_HUMAN Unconventional myosin-Ie OS=Homo sapiens OX=9606 GN=MYO1E PE=1 SV=2	PKPQVPQC(BTD[C])K|PKPQVPQC(BTD[C])K	2|1	1.965|1.74	1.8525	0.1591	3	2
88	P78371	289	CCT2	TCPB_HUMAN T-complex protein 1 subunit beta OS=Homo sapiens OX=9606 GN=CCT2 PE=1 SV=4	HGINC(BTD[C])FINR|	1|	1.85|	1.85	NA	1	1
89	Q9UBT2	185	UBA2	SAE2_HUMAN SUMO-activating enzyme subunit 2 OS=Homo sapiens OX=9606 GN=UBA2 PE=1 SV=2	NTPSEPIHC(BTD[C])IVWAK|NTPSEPIHC(BTD[C])IVWAK	1|1	1.16|2.54	1.85	0.97581	2	2
90	P31321	347	PRKAR1B	KAP1_HUMAN cAMP-dependent protein kinase type I-beta regulatory subunit OS=Homo sapiens OX=9606 GN=PRKAR1B PE=1 SV=4	GPLKC(BTD[C])VK|GPLKC(BTD[C])VK	4|1	1.62|2.07	1.845	0.3182	5	2
91	Q14764	59	MVP	MVP_HUMAN Major vault protein OS=Homo sapiens OX=9606 GN=MVP PE=1 SV=4	HYC(BTD[C])TVANPVSR|HYC(BTD[C])TVANPVSR	2|3	1.845|1.84	1.8425	0.00354	5	2
92	P49915	554	GMPS	GUAA_HUMAN GMP synthase [glutamine-hydrolyzing] OS=Homo sapiens OX=9606 GN=GMPS PE=1 SV=1	MC(BTD[C])HNVNR|	8|	1.84|	1.84	NA	8	1
93	P27361	82	MAPK3	MK03_HUMAN Mitogen-activated protein kinase 3 OS=Homo sapiens OX=9606 GN=MAPK3 PE=1 SV=4	SPFEHQTYC(BTD[C])QR|	2|	1.84|	1.84	NA	2	1
94	P50991	295	CCT4	TCPD_HUMAN T-complex protein 1 subunit delta OS=Homo sapiens OX=9606 GN=CCT4 PE=1 SV=4	TGC(BTD[C])NVLLIQK|	2|	1.84|	1.84	NA	2	1
95	P15121	81	AKR1B1	ALDR_HUMAN Aldo-keto reductase family 1 member B1 OS=Homo sapiens OX=9606 GN=AKR1B1 PE=1 SV=3	LWC(BTD[C])TYHEK|	3|	1.83|	1.83	NA	3	1
96	P53618	143	COPB1	COPB_HUMAN Coatomer subunit beta OS=Homo sapiens OX=9606 GN=COPB1 PE=1 SV=3	AC(BTD[C])LEHR|AC(BTD[C])LEHR	1|2	2.24|1.4	1.82	0.59397	3	2
97	Q99436	74	PSMB7	PSB7_HUMAN Proteasome subunit beta type-7 OS=Homo sapiens OX=9606 GN=PSMB7 PE=1 SV=1	ATEGMVVADKNC(BTD[C])SK|ATEGMVVADKNC(BTD[C])SK	1|1	1.85|1.78	1.815	0.0495	2	2
98	P35606	56	COPB2	COPB2_HUMAN Coatomer subunit beta' OS=Homo sapiens OX=9606 GN=COPB2 PE=1 SV=2	FEVC(BTD[C])DLPVR|FEVC(BTD[C])DLPVR	1|1	1.95|1.68	1.815	0.19092	2	2
99	Q00610	918	CLTC	CLH1_HUMAN Clathrin heavy chain 1 OS=Homo sapiens OX=9606 GN=CLTC PE=1 SV=5	DPHLAC(BTD[C])VAYER|DPHLAC(BTD[C])VAYER	1|2	2.02|1.59	1.805	0.30406	3	2
100	P13639	591	EEF2	EF2_HUMAN Elongation factor 2 OS=Homo sapiens OX=9606 GN=EEF2 PE=1 SV=4	|ETVSEESNVLC(BTD[C])LSK	|1	|1.79	1.79	NA	1	1
101	O43390	226	HNRNPR	HNRPR_HUMAN Heterogeneous nuclear ribonucleoprotein R OS=Homo sapiens OX=9606 GN=HNRNPR PE=1 SV=1	LC(BTD[C])DSYEIRPGK|LC(BTD[C])DSYEIRPGK	2|1	2.04|1.53	1.785	0.36062	3	2
102	Q96AG4	59	LRRC59	LRC59_HUMAN Leucine-rich repeat-containing protein 59 OS=Homo sapiens OX=9606 GN=LRRC59 PE=1 SV=1	LPSDFC(BTD[C])GLTHLVK|PSDFC(BTD[C])GLTHLVK LPSDFC(BTD[C])GLTHLVK	1|3	1.99|1.57	1.78	0.29698	4	2
103	O15523	315	DDX3Y	DDX3Y_HUMAN ATP-dependent RNA helicase DDX3Y OS=Homo sapiens OX=9606 GN=DDX3Y PE=1 SV=2	GC(BTD[C])HLLVATPGR|GC(BTD[C])HLLVATPGR	2|2	1.805|1.745	1.775	0.04243	4	2
104	P09429	23	HMGB1	HMGB1_HUMAN High mobility group protein B1 OS=Homo sapiens OX=9606 GN=HMGB1 PE=1 SV=3	FVQTC(BTD[C])R|	1|	1.77|	1.77	NA	1	1	Modified residue, Disulfide bond
105	Q9BZL1	18	UBL5	UBL5_HUMAN Ubiquitin-like protein 5 OS=Homo sapiens OX=9606 GN=UBL5 PE=1 SV=1	|VKC(BTD[C])NTDDTIGDLKK	|1	|1.77	1.77	NA	1	1
106	P14678	19	SNRPB	RSMB_HUMAN Small nuclear ribonucleoprotein-associated proteins B and B' OS=Homo sapiens OX=9606 GN=SNRPB PE=1 SV=2	MRC(BTD[C])ILQDGR|MRC(BTD[C])ILQDGR	6|5	1.115|2.42	1.7675	0.92277	11	2
107	P07910	46	HNRNPC	HNRPC_HUMAN Heterogeneous nuclear ribonucleoproteins C1/C2 OS=Homo sapiens OX=9606 GN=HNRNPC PE=1 SV=4	VGC(BTD[C])SVHK|VGC(BTD[C])SVHK IVGC(BTD[C])SVHK	1|3	2.21|1.3	1.755	0.64347	4	2
108	Q16563	193	SYPL1	SYPL1_HUMAN Synaptophysin-like protein 1 OS=Homo sapiens OX=9606 GN=SYPL1 PE=1 SV=1	IATGHNIIDELPPC(BTD[C])K|	1|	1.75|	1.75	NA	1	1
109	Q99832	364	CCT7	TCPH_HUMAN T-complex protein 1 subunit eta OS=Homo sapiens OX=9606 GN=CCT7 PE=1 SV=2	YNFFTGC(BTD[C])PK|	1|	1.75|	1.75	NA	1	1
110	P31942	27	HNRNPH3	HNRH3_HUMAN Heterogeneous nuclear ribonucleoprotein H3 OS=Homo sapiens OX=9606 GN=HNRNPH3 PE=1 SV=2	|GLPFGC(BTD[C])SK	|1	|1.75	1.75	NA	1	1
111	Q9NZM1	1402	MYOF	MYOF_HUMAN Myoferlin OS=Homo sapiens OX=9606 GN=MYOF PE=1 SV=1	FRC(BTD[C])DPYAGK|FRC(BTD[C])DPYAGK	4|3	1.87|1.61	1.74	0.18385	7	2
112	Q14152	478	EIF3A	EIF3A_HUMAN Eukaryotic translation initiation factor 3 subunit A OS=Homo sapiens OX=9606 GN=EIF3A PE=1 SV=1	HC(BTD[C])DLQVR|HC(BTD[C])DLQVR	1|2	1.75|1.725	1.7375	0.01768	3	2
113	P49368	40	CCT3	TCPG_HUMAN T-complex protein 1 subunit gamma OS=Homo sapiens OX=9606 GN=CCT3 PE=1 SV=4	TC(BTD[C])LGPK|	2|	1.73|	1.73	NA	2	1
114	P49368	372	CCT3	TCPG_HUMAN T-complex protein 1 subunit gamma OS=Homo sapiens OX=9606 GN=CCT3 PE=1 SV=4	AC(BTD[C])TILLR|AC(BTD[C])TILLR	2|2	1.43|2.03	1.73	0.42426	4	2	Disulfide bond
115	Q09028	167	RBBP4	RBBP4_HUMAN Histone-binding protein RBBP4 OS=Homo sapiens OX=9606 GN=RBBP4 PE=1 SV=3	HPSKPDPSGEC(BTD[C])NPDLR|	1|	1.72|	1.72	NA	1	1
116	Q14103	252	HNRNPD	HNRPD_HUMAN Heterogeneous nuclear ribonucleoprotein D0 OS=Homo sapiens OX=9606 GN=HNRNPD PE=1 SV=1	YHNVGLSKC(BTD[C])EIK|	1|	1.72|	1.72	NA	1	1
117	Q08211	940	DHX9	DHX9_HUMAN ATP-dependent RNA helicase A OS=Homo sapiens OX=9606 GN=DHX9 PE=1 SV=4	FC(BTD[C])EHKR|	1|	1.72|	1.72	NA	1	1
118	O60701	112	UGDH	UGDH_HUMAN UDP-glucose 6-dehydrogenase OS=Homo sapiens OX=9606 GN=UGDH PE=1 SV=1	|YIEAC(BTD[C])AR	|1	|1.72	1.72	NA	1	1
119	P60981	46	DSTN	DEST_HUMAN Destrin OS=Homo sapiens OX=9606 GN=DSTN PE=1 SV=3	KC(BTD[C])IIVEEGK|KC(BTD[C])IIVEEGK	2|3	1.8|1.63	1.715	0.12021	5	2
120	P49327	779	FASN	FAS_HUMAN Fatty acid synthase OS=Homo sapiens OX=9606 GN=FASN PE=1 SV=3	GLKPSC(BTD[C])TIIPLMK|GLKPSC(BTD[C])TIIPLMK	2|2	1.7|1.73	1.715	0.02121	4	2
121	Q9GZT3	48	SLIRP	SLIRP_HUMAN SRA stem-loop-interacting RNA-binding protein, mitochondrial OS=Homo sapiens OX=9606 GN=SLIRP PE=1 SV=1	RC(BTD[C])ILPFDK|RC(BTD[C])ILPFDK	3|1	1.69|1.73	1.71	0.02828	4	2
122	P14618	49	PKM	KPYM_HUMAN Pyruvate kinase PKM OS=Homo sapiens OX=9606 GN=PKM PE=1 SV=4	IC(BTD[C])TIGPASR NTGIIC(BTD[C])TIGPASR|IC(BTD[C])TIGPASR IIC(BTD[C])TIGPASR NTGIIC(BTD[C])TIGPASR TGIIC(BTD[C])TIGPASR GIIC(BTD[C])TIGPASR	6|9	2.055|1.35	1.7025	0.49851	15	2
123	O14964	75	HGS	HGS_HUMAN Hepatocyte growth factor-regulated tyrosine kinase substrate OS=Homo sapiens OX=9606 GN=HGS PE=1 SV=1	|NC(BTD[C])GQTVHDEVANK	|1	|1.7	1.7	NA	1	1
124	Q15637	171	SF1	SF01_HUMAN Splicing factor 1 OS=Homo sapiens OX=9606 GN=SF1 PE=1 SV=4	NIEKEC(BTD[C])NAK|	1|	1.69|	1.69	NA	1	1
125	P30838	217	ALDH3A1	AL3A1_HUMAN Aldehyde dehydrogenase, dimeric NADP-preferring OS=Homo sapiens OX=9606 GN=ALDH3A1 PE=1 SV=3	SPC(BTD[C])YVDK|SPC(BTD[C])YVDK	5|2	1.66|1.72	1.69	0.04243	7	2
126	P09936	132	UCHL1	UCHL1_HUMAN Ubiquitin carboxyl-terminal hydrolase isozyme L1 OS=Homo sapiens OX=9606 GN=UCHL1 PE=1 SV=2	|AKC(BTD[C])FEK	|1	|1.69	1.69	NA	1	1
127	P17812	30	CTPS1	PYRG1_HUMAN CTP synthase 1 OS=Homo sapiens OX=9606 GN=CTPS1 PE=1 SV=2	SC(BTD[C])GLHVTSIK|SC(BTD[C])GLHVTSIK	3|1	1.57|1.8	1.685	0.16263	4	2
128	Q9NTK5	75	OLA1	OLA1_HUMAN Obg-like ATPase 1 OS=Homo sapiens OX=9606 GN=OLA1 PE=1 SV=2	FDFLC(BTD[C])QYHKPASK|	2|	1.685|	1.685	NA	2	1
129	P00558	108	PGK1	PGK1_HUMAN Phosphoglycerate kinase 1 OS=Homo sapiens OX=9606 GN=PGK1 PE=1 SV=3	AC(BTD[C])ANPAAGSVILLENLR|AC(BTD[C])ANPAAGSVILLENLR	1|2	1.56|1.81	1.685	0.17678	3	2
130	P34932	38	HSPA4	HSP74_HUMAN Heat shock 70 kDa protein 4 OS=Homo sapiens OX=9606 GN=HSPA4 PE=1 SV=4	TPAC(BTD[C])ISFGPK|	2|	1.68|	1.68	NA	2	1
131	P78559	39	MAP1A	MAP1A_HUMAN Microtubule-associated protein 1A OS=Homo sapiens OX=9606 GN=MAP1A PE=1 SV=6	|KPC(BTD[C])CYIFPGGR	|1	|1.67	1.67	NA	1	1
132	Q13347	76	EIF3I	EIF3I_HUMAN Eukaryotic translation initiation factor 3 subunit I OS=Homo sapiens OX=9606 GN=EIF3I PE=1 SV=1	HVLTGSADNSC(BTD[C])R|	1|	1.66|	1.66	NA	1	1
133	Q14152	198	EIF3A	EIF3A_HUMAN Eukaryotic translation initiation factor 3 subunit A OS=Homo sapiens OX=9606 GN=EIF3A PE=1 SV=1	LC(BTD[C])DNLR|	2|	1.66|	1.66	NA	2	1
134	P12814	180	ACTN1	ACTN1_HUMAN Alpha-actinin-1 OS=Homo sapiens OX=9606 GN=ACTN1 PE=1 SV=2	FC(BTD[C])AILHR|	4|	1.66|	1.66	NA	4	1
135	P11142	574	HSPA8	HSP7C_HUMAN Heat shock cognate 71 kDa protein OS=Homo sapiens OX=9606 GN=HSPA8 PE=1 SV=1	ILDKC(BTD[C])NEIINWLDK|ILDKC(BTD[C])NEIINWLDK	1|1	1.69|1.63	1.66	0.04243	2	2
136	P17844	89	DDX5	DDX5_HUMAN Probable ATP-dependent RNA helicase DDX5 OS=Homo sapiens OX=9606 GN=DDX5 PE=1 SV=1	GHNC(BTD[C])PK|GHNC(BTD[C])PK	3|2	1.74|1.57	1.655	0.12021	5	2
137	P35244	26	RPA3	RFA3_HUMAN Replication protein A 14 kDa subunit OS=Homo sapiens OX=9606 GN=RPA3 PE=1 SV=1	FIDKPVC(BTD[C])FVGR|	1|	1.65|	1.65	NA	1	1
138	P49327	1992	FASN	FAS_HUMAN Fatty acid synthase OS=Homo sapiens OX=9606 GN=FASN PE=1 SV=3	DGLLENQTPEFFQDVC(BTD[C])KPK|	1|	1.65|	1.65	NA	1	1
139	P60174	124	TPI1	TPIS_HUMAN Triosephosphate isomerase OS=Homo sapiens OX=9606 GN=TPI1 PE=1 SV=3	DC(BTD[C])GATWVVLGHSER|	2|	1.645|	1.645	NA	2	1
140	P15121	304	AKR1B1	ALDR_HUMAN Aldo-keto reductase family 1 member B1 OS=Homo sapiens OX=9606 GN=AKR1B1 PE=1 SV=3	VCALLSC(BTD[C])TSHK|VCALLSC(BTD[C])TSHK	2|3	1.81|1.47	1.64	0.24042	5	2
141	Q13098	251	GPS1	CSN1_HUMAN COP9 signalosome complex subunit 1 OS=Homo sapiens OX=9606 GN=GPS1 PE=1 SV=4	LKC(BTD[C])AAGLAELAAR|	2|	1.64|	1.64	NA	2	1
142	P17844	170	DDX5	DDX5_HUMAN Probable ATP-dependent RNA helicase DDX5 OS=Homo sapiens OX=9606 GN=DDX5 PE=1 SV=1	GDGPIC(BTD[C])LVLAPTR|	2|	1.63|	1.63	NA	2	1
143	P23526	228	AHCY	SAHH_HUMAN Adenosylhomocysteinase OS=Homo sapiens OX=9606 GN=AHCY PE=1 SV=4	GC(BTD[C])AQALR|GC(BTD[C])AQALR	3|2	1.13|2.12	1.625	0.70004	5	2
144	O00154	92	ACOT7	BACH_HUMAN Cytosolic acyl coenzyme A thioester hydrolase OS=Homo sapiens OX=9606 GN=ACOT7 PE=1 SV=3	|HC(BTD[C])NSQNGER	|4	|1.625	1.625	NA	4	1
145	P22234	266	PAICS	PUR6_HUMAN Multifunctional protein ADE2 OS=Homo sapiens OX=9606 GN=PAICS PE=1 SV=3	SESQC(BTD[C])R|	1|	1.62|	1.62	NA	1	1
146	O75600	106	GCAT	KBL_HUMAN 2-amino-3-ketobutyrate coenzyme A ligase, mitochondrial OS=Homo sapiens OX=9606 GN=GCAT PE=1 SV=1	FIC(BTD[C])GTQSIHK|FIC(BTD[C])GTQSIHK	2|1	1.59|1.65	1.62	0.04243	3	2
147	Q9BYT8	255	NLN	NEUL_HUMAN Neurolysin, mitochondrial OS=Homo sapiens OX=9606 GN=NLN PE=1 SV=1	KC(BTD[C])CIPETR|KC(BTD[C])CIPETR	2|2	1.575|1.645	1.61	0.0495	4	2
148	P60660	32	MYL6	MYL6_HUMAN Myosin light polypeptide 6 OS=Homo sapiens OX=9606 GN=MYL6 PE=1 SV=2	SQC(BTD[C])GDVMR YSQC(BTD[C])GDVMR|YSQC(BTD[C])GDVMR	8|1	1.78|1.42	1.6	0.25456	9	2
149	P50395	302	GDI2	GDIB_HUMAN Rab GDP dissociation inhibitor beta OS=Homo sapiens OX=9606 GN=GDI2 PE=1 SV=2	VIC(BTD[C])ILSHPIK|VIC(BTD[C])ILSHPIK	1|1	1.82|1.38	1.6	0.31113	2	2
150	P18669	55	PGAM1	PGAM1_HUMAN Phosphoglycerate mutase 1 OS=Homo sapiens OX=9606 GN=PGAM1 PE=1 SV=2	DIC(BTD[C])FTSVQK EFDIC(BTD[C])FTSVQK AGYEFDIC(BTD[C])FTSVQK YEFDIC(BTD[C])FTSVQK|FDIC(BTD[C])FTSVQK	7|2	1.33|1.86	1.595	0.37477	9	2
151	Q14CX7	365	NAA25	NAA25_HUMAN N-alpha-acetyltransferase 25, NatB auxiliary subunit OS=Homo sapiens OX=9606 GN=NAA25 PE=1 SV=1	FGDKPCC(BTD[C])FTDLK|	1|	1.59|	1.59	NA	1	1
152	P39023	157	RPL3	RL3_HUMAN 60S ribosomal protein L3 OS=Homo sapiens OX=9606 GN=RPL3 PE=1 SV=2	KYC(BTD[C])QVIR|YC(BTD[C])QVIR	1|1	1.74|1.43	1.585	0.2192	2	2
153	Q06203	207	PPAT	PUR1_HUMAN Amidophosphoribosyltransferase OS=Homo sapiens OX=9606 GN=PPAT PE=1 SV=1	|DPYGNRPLC(BTD[C])IGR	|1	|1.58	1.58	NA	1	1
154	P14174	57	MIF	MIF_HUMAN Macrophage migration inhibitory factor OS=Homo sapiens OX=9606 GN=MIF PE=1 SV=4	GGSSEPC(BTD[C])ALCSLHSIGK|FGGSSEPC(BTD[C])ALCSLHSIGK	2|1	1.805|1.35	1.5775	0.32173	3	2
155	Q02790	103	FKBP4	FKBP4_HUMAN Peptidyl-prolyl cis-trans isomerase FKBP4 OS=Homo sapiens OX=9606 GN=FKBP4 PE=1 SV=3	VGEVC(BTD[C])HITCKPEYAYGSAGSPPK|VGEVC(BTD[C])HITCKPEYAYGSAGSPPK	1|1	1.39|1.76	1.575	0.26163	2	2
156	P08708	35	RPS17	RS17_HUMAN 40S ribosomal protein S17 OS=Homo sapiens OX=9606 GN=RPS17 PE=1 SV=2	VC(BTD[C])EEIAIIPSKK RVC(BTD[C])EEIAIIPSK VC(BTD[C])EEIAIIPSK|VC(BTD[C])EEIAIIPSKK RVC(BTD[C])EEIAIIPSK VC(BTD[C])EEIAIIPSK	6|6	1.91|1.24	1.575	0.47376	12	2
157	P30046	24	DDT	DOPD_HUMAN D-dopachrome decarboxylase OS=Homo sapiens OX=9606 GN=DDT PE=1 SV=3	RLC(BTD[C])AAAASILGK LC(BTD[C])AAAASILGK|RLC(BTD[C])AAAASILGK	3|2	1.47|1.68	1.575	0.14849	5	2
158	Q03154	49	ACY1	ACY1_HUMAN Aminoacylase-1 OS=Homo sapiens OX=9606 GN=ACY1 PE=1 SV=1	LGLGC(BTD[C])QK|	1|	1.57|	1.57	NA	1	1
159	P35579	569	MYH9	MYH9_HUMAN Myosin-9 OS=Homo sapiens OX=9606 GN=MYH9 PE=1 SV=4	ADFC(BTD[C])IIHYAGK|	2|	1.57|	1.57	NA	2	1
160	P60059	25	SEC61G	SC61G_HUMAN Protein transport protein Sec61 subunit gamma OS=Homo sapiens OX=9606 GN=SEC61G PE=1 SV=1	RC(BTD[C])TKPDR|	1|	1.57|	1.57	NA	1	1
161	P27348	25	YWHAQ	1433T_HUMAN 14-3-3 protein theta OS=Homo sapiens OX=9606 GN=YWHAQ PE=1 SV=1	MATC(BTD[C])MK|	1|	1.56|	1.56	NA	1	1
162	Q96B97	272	SH3KBP1	SH3K1_HUMAN SH3 domain-containing kinase-binding protein 1 OS=Homo sapiens OX=9606 GN=SH3KBP1 PE=1 SV=2	SKDYC(BTD[C])K|	1|	1.56|	1.56	NA	1	1
163	Q15393	1156	SF3B3	SF3B3_HUMAN Splicing factor 3B subunit 3 OS=Homo sapiens OX=9606 GN=SF3B3 PE=1 SV=4	SEHPPLC(BTD[C])GR|SEHPPLC(BTD[C])GR	1|1	1.56|1.54	1.55	0.01414	2	2
164	Q9Y490	1509	TLN1	TLN1_HUMAN Talin-1 OS=Homo sapiens OX=9606 GN=TLN1 PE=1 SV=3	|HTSALCNSC(BTD[C])R	|1	|1.55	1.55	NA	1	1
165	Q9NX02	783	NLRP2	NALP2_HUMAN NACHT, LRR and PYD domains-containing protein 2 OS=Homo sapiens OX=9606 GN=NLRP2 PE=1 SV=1	|HPEC(BTD[C])NLR	|1	|1.55	1.55	NA	1	1
166	Q9Y315	118	DERA	DEOC_HUMAN Deoxyribose-phosphate aldolase OS=Homo sapiens OX=9606 GN=DERA PE=1 SV=2	|AAGC(BTD[C])NIPVASVAAGFPAGQTHLK	|1	|1.55	1.55	NA	1	1
167	P61981	112	YWHAG	1433G_HUMAN 14-3-3 protein gamma OS=Homo sapiens OX=9606 GN=YWHAG PE=1 SV=2	NC(BTD[C])SETQYESK|NC(BTD[C])SETQYESK	2|2	1.45|1.645	1.5475	0.13789	4	2
168	P62826	120	RAN	RAN_HUMAN GTP-binding nuclear protein Ran OS=Homo sapiens OX=9606 GN=RAN PE=1 SV=3	VCENIPIVLC(BTD[C])GNK|VCENIPIVLC(BTD[C])GNK	1|2	1.51|1.57	1.54	0.04243	3	2
169	P35232	69	PHB	PHB_HUMAN Prohibitin OS=Homo sapiens OX=9606 GN=PHB PE=1 SV=1	|PIIFDC(BTD[C])R	|1	|1.54	1.54	NA	1	1
170	Q8WUM4	512	PDCD6IP	PDC6I_HUMAN Programmed cell death 6-interacting protein OS=Homo sapiens OX=9606 GN=PDCD6IP PE=1 SV=1	EC(BTD[C])YQSHR|	2|	1.535|	1.535	NA	2	1
171	P00491	78	PNP	PNPH_HUMAN Purine nucleoside phosphorylase OS=Homo sapiens OX=9606 GN=PNP PE=1 SV=2	AC(BTD[C])VMMQGR|AC(BTD[C])VMMQGR	2|1	1.555|1.51	1.5325	0.03182	3	2
172	Q16881	571	TXNRD1	TRXR1_HUMAN Thioredoxin reductase 1, cytoplasmic OS=Homo sapiens OX=9606 GN=TXNRD1 PE=1 SV=3	DNNKC(BTD[C])YAK|	1|	1.53|	1.53	NA	1	1
173	P16152	122	CBR1	CBR1_HUMAN Carbonyl reductase [NADPH] 1 OS=Homo sapiens OX=9606 GN=CBR1 PE=1 SV=3	DVC(BTD[C])TELLPLIKPQGR|	1|	1.53|	1.53	NA	1	1
174	O94973	330	AP2A2	AP2A2_HUMAN AP-2 complex subunit alpha-2 OS=Homo sapiens OX=9606 GN=AP2A2 PE=1 SV=2	AC(BTD[C])NQLGQFLQHR|AC(BTD[C])NQLGQFLQHR	1|2	1.66|1.385	1.5225	0.19445	3	2
175	P24390	29	KDELR1	ERD21_HUMAN ER lumen protein-retaining receptor 1 OS=Homo sapiens OX=9606 GN=KDELR1 PE=1 SV=1	SC(BTD[C])AGISGK|	2|	1.52|	1.52	NA	2	1
176	Q15274	96	QPRT	NADC_HUMAN Nicotinate-nucleotide pyrophosphorylase [carboxylating] OS=Homo sapiens OX=9606 GN=QPRT PE=1 SV=3	GPAHC(BTD[C])LLLGER|	1|	1.52|	1.52	NA	1	1
177	P07237	312	P4HB	PDIA1_HUMAN Protein disulfide-isomerase OS=Homo sapiens OX=9606 GN=P4HB PE=1 SV=3	KEEC(BTD[C])PAVR|KEEC(BTD[C])PAVR	2|2	1.48|1.54	1.51	0.04243	4	2
178	P55072	522	VCP	TERA_HUMAN Transitional endoplasmic reticulum ATPase OS=Homo sapiens OX=9606 GN=VCP PE=1 SV=4	|GPPGC(BTD[C])GK	|1	|1.51	1.51	NA	1	1
179	P36542	103	ATP5F1C	ATPG_HUMAN ATP synthase subunit gamma, mitochondrial OS=Homo sapiens OX=9606 GN=ATP5F1C PE=1 SV=1	|GLC(BTD[C])GAIHSSIAK	|2	|1.51	1.51	NA	2	1
180	Q9H0S4	226	DDX47	DDX47_HUMAN Probable ATP-dependent RNA helicase DDX47 OS=Homo sapiens OX=9606 GN=DDX47 PE=1 SV=1	NPVKC(BTD[C])AVSSK|	1|	1.5|	1.5	NA	1	1
181	Q92979	171	EMG1	NEP1_HUMAN Ribosomal RNA small subunit methyltransferase NEP1 OS=Homo sapiens OX=9606 GN=EMG1 PE=1 SV=4	NPVSDHFPVGC(BTD[C])MK|NPVSDHFPVGC(BTD[C])MK	1|1	1.49|1.51	1.5	0.01414	2	2
182	P09496	218	CLTA	CLCA_HUMAN Clathrin light chain A OS=Homo sapiens OX=9606 GN=CLTA PE=1 SV=1	|LC(BTD[C])DFNPK	|2	|1.5	1.5	NA	2	1
183	P09382	17	LGALS1	LEG1_HUMAN Galectin-1 OS=Homo sapiens OX=9606 GN=LGALS1 PE=1 SV=2	LKPGEC(BTD[C])LR|NLKPGEC(BTD[C])LR VASNLNLKPGEC(BTD[C])LR	2|2	1.54|1.455	1.4975	0.0601	4	2
184	O94979	60	SEC31A	SC31A_HUMAN Protein transport protein Sec31A OS=Homo sapiens OX=9606 GN=SEC31A PE=1 SV=3	SC(BTD[C])ATFSSSHR|	1|	1.49|	1.49	NA	1	1
185	P55072	535	VCP	TERA_HUMAN Transitional endoplasmic reticulum ATPase OS=Homo sapiens OX=9606 GN=VCP PE=1 SV=4	AIANEC(BTD[C])QANFISIK|	1|	1.49|	1.49	NA	1	1
186	P50990	148	CCT8	TCPQ_HUMAN T-complex protein 1 subunit theta OS=Homo sapiens OX=9606 GN=CCT8 PE=1 SV=4	AHEILPNLVC(BTD[C])CSAK|KAHEILPNLVC(BTD[C])CSAK	2|1	1.915|1.06	1.4875	0.60458	3	2
187	Q14152	78	EIF3A	EIF3A_HUMAN Eukaryotic translation initiation factor 3 subunit A OS=Homo sapiens OX=9606 GN=EIF3A PE=1 SV=1	NIC(BTD[C])QQVNIK|	2|	1.485|	1.485	NA	2	1
188	O95831	256	AIFM1	AIFM1_HUMAN Apoptosis-inducing factor 1, mitochondrial OS=Homo sapiens OX=9606 GN=AIFM1 PE=1 SV=1	LNDGSQITYEKC(BTD[C])LIATGGTPR|LNDGSQITYEKC(BTD[C])LIATGGTPR	1|1	1.35|1.62	1.485	0.19092	2	2
189	O95372	56	LYPLA2	LYPA2_HUMAN Acyl-protein thioesterase 2 OS=Homo sapiens OX=9606 GN=LYPLA2 PE=1 SV=1	IC(BTD[C])PHAPR|IC(BTD[C])PHAPR	3|3	1.75|1.21	1.48	0.38184	6	2
190	P23396	134	RPS3	RS3_HUMAN 40S ribosomal protein S3 OS=Homo sapiens OX=9606 GN=RPS3 PE=1 SV=2	GC(BTD[C])EVVVSGK|GC(BTD[C])EVVVSGK	2|1	1.43|1.53	1.48	0.07071	3	2
191	Q15149	965	PLEC	PLEC_HUMAN Plectin OS=Homo sapiens OX=9606 GN=PLEC PE=1 SV=3	GDEC(BTD[C])QLVGPAQPSHWK|GDEC(BTD[C])QLVGPAQPSHWK	1|1	1.57|1.39	1.48	0.12728	2	2
192	Q8TEX9	782	IPO4	IPO4_HUMAN Importin-4 OS=Homo sapiens OX=9606 GN=IPO4 PE=1 SV=2	SC(BTD[C])GTLTLKPPGR|SC(BTD[C])GTLTLKPPGR	2|2	1.61|1.34	1.475	0.19092	4	2
193	Q8TBC4	249	UBA3	UBA3_HUMAN NEDD8-activating enzyme E1 catalytic subunit OS=Homo sapiens OX=9606 GN=UBA3 PE=1 SV=2	LPEHC(BTD[C])IEYVR|	1|	1.47|	1.47	NA	1	1
194	P09936	220	UCHL1	UCHL1_HUMAN Ubiquitin carboxyl-terminal hydrolase isozyme L1 OS=Homo sapiens OX=9606 GN=UCHL1 PE=1 SV=2	FSAVALC(BTD[C])K|	2|	1.47|	1.47	NA	2	1
195	Q9ULC4	144	MCTS1	MCTS1_HUMAN Malignant T-cell-amplified sequence 1 OS=Homo sapiens OX=9606 GN=MCTS1 PE=1 SV=1	|QHALC(BTD[C])VGVMK	|1	|1.47	1.47	NA	1	1
196	Q9Y6C9	79	MTCH2	MTCH2_HUMAN Mitochondrial carrier homolog 2 OS=Homo sapiens OX=9606 GN=MTCH2 PE=1 SV=1	|LC(BTD[C])SGVLGTVVHGK	|2	|1.47	1.47	NA	2	1
197	P17655	640	CAPN2	CAN2_HUMAN Calpain-2 catalytic subunit OS=Homo sapiens OX=9606 GN=CAPN2 PE=1 SV=6	MPC(BTD[C])QLHQVIVAR|MPC(BTD[C])QLHQVIVAR	4|2	1.55|1.38	1.465	0.12021	6	2
198	P50991	379	CCT4	TCPD_HUMAN T-complex protein 1 subunit delta OS=Homo sapiens OX=9606 GN=CCT4 PE=1 SV=4	|ITGC(BTD[C])ASPGK	|1	|1.46	1.46	NA	1	1
199	Q07955	16	SRSF1	SRSF1_HUMAN Serine/arginine-rich splicing factor 1 OS=Homo sapiens OX=9606 GN=SRSF1 PE=1 SV=2	PAGNNDC(BTD[C])R GPAGNNDC(BTD[C])R|PAGNNDC(BTD[C])R GPAGNNDC(BTD[C])R	4|3	1.25|1.66	1.455	0.28991	7	2
200	Q5H9R7	216	PPP6R3	PP6R3_HUMAN Serine/threonine-protein phosphatase 6 regulatory subunit 3 OS=Homo sapiens OX=9606 GN=PPP6R3 PE=1 SV=2	HSNASQSLC(BTD[C])EIVR|HSNASQSLC(BTD[C])EIVR	1|1	1.27|1.63	1.45	0.25456	2	2
201	P61289	133	PSME3	PSME3_HUMAN Proteasome activator complex subunit 3 OS=Homo sapiens OX=9606 GN=PSME3 PE=1 SV=1	LLIEKC(BTD[C])NTVK|LLIEKC(BTD[C])NTVK	2|2	1.46|1.425	1.4425	0.02475	4	2
202	Q9Y399	162	MRPS2	RT02_HUMAN 28S ribosomal protein S2, mitochondrial OS=Homo sapiens OX=9606 GN=MRPS2 PE=1 SV=1	DC(BTD[C])GEYAHTR|	1|	1.44|	1.44	NA	1	1
203	P00352	133	ALDH1A1	AL1A1_HUMAN Retinal dehydrogenase 1 OS=Homo sapiens OX=9606 GN=ALDH1A1 PE=1 SV=2	YC(BTD[C])AGWADK|YC(BTD[C])AGWADK	3|1	1.69|1.19	1.44	0.35355	4	2
204	P52788	237	SMS	SPSY_HUMAN Spermine synthase OS=Homo sapiens OX=9606 GN=SMS PE=1 SV=2	KTC(BTD[C])GDVLDNLK|KTC(BTD[C])GDVLDNLK	1|1	0.92|1.96	1.44	0.73539	2	2
205	P54652	606	HSPA2	HSP72_HUMAN Heat shock-related 70 kDa protein 2 OS=Homo sapiens OX=9606 GN=HSPA2 PE=1 SV=1	VC(BTD[C])NPIISK|	1|	1.44|	1.44	NA	1	1
206	P07099	80	EPHX1	HYEP_HUMAN Epoxide hydrolase 1 OS=Homo sapiens OX=9606 GN=EPHX1 PE=1 SV=1	FTPPLEDSC(BTD[C])FHYGFNSNYLK|	1|	1.44|	1.44	NA	1	1
207	P29474	991	NOS3	NOS3_HUMAN Nitric oxide synthase, endothelial OS=Homo sapiens OX=9606 GN=NOS3 PE=1 SV=4	VPC(BTD[C])FLR|	1|	1.44|	1.44	NA	1	1
208	Q9Y281	39	CFL2	COF2_HUMAN Cofilin-2 OS=Homo sapiens OX=9606 GN=CFL2 PE=1 SV=1	|FC(BTD[C])LSDDKR	|1	|1.44	1.44	NA	1	1
209	Q6NW34	419	NEPRO	NEPRO_HUMAN Nucleolus and neural progenitor protein OS=Homo sapiens OX=9606 GN=NEPRO PE=1 SV=3	KLEC(BTD[C])IK|KLEC(BTD[C])IK	3|2	1.41|1.45	1.43	0.02828	5	2
210	Q9BTE3	239	MCMBP	MCMBP_HUMAN Mini-chromosome maintenance complex-binding protein OS=Homo sapiens OX=9606 GN=MCMBP PE=1 SV=2	GPAC(BTD[C])LVK|	1|	1.43|	1.43	NA	1	1
211	P07858	59	CTSB	CATB_HUMAN Cathepsin B OS=Homo sapiens OX=9606 GN=CTSB PE=1 SV=3	LC(BTD[C])GTFLGGPKPPQR|LC(BTD[C])GTFLGGPKPPQR	1|1	1.29|1.57	1.43	0.19799	2	2
212	Q01469	87	FABP5	FABP5_HUMAN Fatty acid-binding protein 5 OS=Homo sapiens OX=9606 GN=FABP5 PE=1 SV=3	|TQTVC(BTD[C])NFTDGALVQHQEWDGK	|1	|1.43	1.43	NA	1	1
213	P09936	90	UCHL1	UCHL1_HUMAN Ubiquitin carboxyl-terminal hydrolase isozyme L1 OS=Homo sapiens OX=9606 GN=UCHL1 PE=1 SV=2	|QTIGNSC(BTD[C])GTIGLIHAVANNQDK	|1	|1.43	1.43	NA	1	1	Active site
214	P48556	112	PSMD8	PSMD8_HUMAN 26S proteasome non-ATPase regulatory subunit 8 OS=Homo sapiens OX=9606 GN=PSMD8 PE=1 SV=2	SPNLSKC(BTD[C])GEELGR|SPNLSKC(BTD[C])GEELGR	1|2	1.31|1.54	1.425	0.16263	3	2
215	P40925	137	MDH1	MDHC_HUMAN Malate dehydrogenase, cytoplasmic OS=Homo sapiens OX=9606 GN=MDH1 PE=1 SV=4	VIVVGNPANTNC(BTD[C])LTASK|	1|	1.42|	1.42	NA	1	1
216	Q9Y5X3	346	SNX5	SNX5_HUMAN Sorting nexin-5 OS=Homo sapiens OX=9606 GN=SNX5 PE=1 SV=1	LAEAHQQEC(BTD[C])CQK|	1|	1.42|	1.42	NA	1	1
217	Q9NRL3	713	STRN4	STRN4_HUMAN Striatin-4 OS=Homo sapiens OX=9606 GN=STRN4 PE=1 SV=2	|TC(BTD[C])VQEITAHR	|1	|1.42	1.42	NA	1	1
218	Q9Y315	182	DERA	DEOC_HUMAN Deoxyribose-phosphate aldolase OS=Homo sapiens OX=9606 GN=DERA PE=1 SV=2	AC(BTD[C])GEAHLK|AC(BTD[C])GEAHLK	3|1	1.5|1.32	1.41	0.12728	4	2
219	Q9P2E9	933	RRBP1	RRBP1_HUMAN Ribosome-binding protein 1 OS=Homo sapiens OX=9606 GN=RRBP1 PE=1 SV=5	SKC(BTD[C])EELSGLHGQLQEAR|	1|	1.41|	1.41	NA	1	1
220	O15067	512	PFAS	PUR4_HUMAN Phosphoribosylformylglycinamidine synthase OS=Homo sapiens OX=9606 GN=PFAS PE=1 SV=4	GNPIC(BTD[C])SLHDQGAGGNGNVLK|GNPIC(BTD[C])SLHDQGAGGNGNVLK	1|1	1.48|1.34	1.41	0.09899	2	2
221	P35579	172	MYH9	MYH9_HUMAN Myosin-9 OS=Homo sapiens OX=9606 GN=MYH9 PE=1 SV=4	EDQSILC(BTD[C])TGESGAGK|	1|	1.41|	1.41	NA	1	1
222	O00410	110	IPO5	IPO5_HUMAN Importin-5 OS=Homo sapiens OX=9606 GN=IPO5 PE=1 SV=4	KVC(BTD[C])DIAAELAR|KVC(BTD[C])DIAAELAR VC(BTD[C])DIAAELAR	2|3	1.33|1.49	1.41	0.11314	5	2
223	Q99460	633	PSMD1	PSMD1_HUMAN 26S proteasome non-ATPase regulatory subunit 1 OS=Homo sapiens OX=9606 GN=PSMD1 PE=1 SV=2	TPEQC(BTD[C])PSVVSLLSESYNPHVR|	1|	1.41|	1.41	NA	1	1
224	Q92783	46	STAM	STAM1_HUMAN Signal transducing adapter molecule 1 OS=Homo sapiens OX=9606 GN=STAM PE=1 SV=3	TGPKDC(BTD[C])LR|	1|	1.4|	1.4	NA	1	1
225	P60174	79	TPI1	TPIS_HUMAN Triosephosphate isomerase OS=Homo sapiens OX=9606 GN=TPI1 PE=1 SV=3	VPADTEVVC(BTD[C])APPTAYIDFAR|	1|	1.4|	1.4	NA	1	1
226	Q9NVS9	156	PNPO	PNPO_HUMAN Pyridoxine-5'-phosphate oxidase OS=Homo sapiens OX=9606 GN=PNPO PE=1 SV=1	|LPEEEAEC(BTD[C])YFHSRPK LPEEEAEC(BTD[C])YFHSR	|3	|1.4	1.4	NA	3	1
227	P35579	816	MYH9	MYH9_HUMAN Myosin-9 OS=Homo sapiens OX=9606 GN=MYH9 PE=1 SV=4	|NC(BTD[C])AAYLK	|1	|1.4	1.4	NA	1	1
228	P09382	61	LGALS1	LEG1_HUMAN Galectin-1 OS=Homo sapiens OX=9606 GN=LGALS1 PE=1 SV=2	NAHGDANTIVC(BTD[C])NSK AHGDANTIVC(BTD[C])NSK HGDANTIVC(BTD[C])NSK FNAHGDANTIVC(BTD[C])NSK|NAHGDANTIVC(BTD[C])NSK AHGDANTIVC(BTD[C])NSK FNAHGDANTIVC(BTD[C])NSK	8|7	1.415|1.38	1.3975	0.02475	15	2
229	P60953	157	CDC42	CDC42_HUMAN Cell division control protein 42 homolog OS=Homo sapiens OX=9606 GN=CDC42 PE=1 SV=2	YVEC(BTD[C])SALTQK|	1|	1.39|	1.39	NA	1	1
230	Q01518	93	CAP1	CAP1_HUMAN Adenylyl cyclase-associated protein 1 OS=Homo sapiens OX=9606 GN=CAP1 PE=1 SV=5	ALLVTASQC(BTD[C])QQPAENK|	1|	1.39|	1.39	NA	1	1
231	Q9NZM1	1131	MYOF	MYOF_HUMAN Myoferlin OS=Homo sapiens OX=9606 GN=MYOF PE=1 SV=1	HSATTVFGANTPIVSC(BTD[C])NFDR|	1|	1.39|	1.39	NA	1	1
232	O75369	450	FLNB	FLNB_HUMAN Filamin-B OS=Homo sapiens OX=9606 GN=FLNB PE=1 SV=2	SPFVVQVGEAC(BTD[C])NPNACR|	1|	1.39|	1.39	NA	1	1
233	P61158	408	ACTR3	ARP3_HUMAN Actin-related protein 3 OS=Homo sapiens OX=9606 GN=ACTR3 PE=1 SV=3	KDYEEIGPSIC(BTD[C])R|	2|	1.38|	1.38	NA	2	1
234	O15145	85	ARPC3	ARPC3_HUMAN Actin-related protein 2/3 complex subunit 3 OS=Homo sapiens OX=9606 GN=ARPC3 PE=1 SV=3	LQKC(BTD[C])NSK|	1|	1.38|	1.38	NA	1	1
235	Q3LXA3	155	TKFC	TKFC_HUMAN Triokinase/FMN cyclase OS=Homo sapiens OX=9606 GN=TKFC PE=1 SV=2	GLC(BTD[C])GTVLIHK|GLC(BTD[C])GTVLIHK	1|2	1.37|1.38	1.375	0.00707	3	2
236	P31948	278	STIP1	STIP1_HUMAN Stress-induced-phosphoprotein 1 OS=Homo sapiens OX=9606 GN=STIP1 PE=1 SV=1	GDYNKC(BTD[C])R|GDYNKC(BTD[C])R	3|2	1.37|1.37	1.37	0	5	2
237	Q9NUI1	53	DECR2	DECR2_HUMAN Peroxisomal 2,4-dienoyl-CoA reductase OS=Homo sapiens OX=9606 GN=DECR2 PE=1 SV=1	HGC(BTD[C])HTVIASR|	4|	1.37|	1.37	NA	4	1
238	P34897	412	SHMT2	GLYM_HUMAN Serine hydroxymethyltransferase, mitochondrial OS=Homo sapiens OX=9606 GN=SHMT2 PE=1 SV=3	NTC(BTD[C])PGDR|NTC(BTD[C])PGDR	1|1	1.03|1.71	1.37	0.48083	2	2
239	P62191	148	PSMC1	PRS4_HUMAN 26S proteasome regulatory subunit 4 OS=Homo sapiens OX=9606 GN=PSMC1 PE=1 SV=1	DLLEPGC(BTD[C])SVLLNHK|	1|	1.37|	1.37	NA	1	1
240	P12270	1068	TPR	TPR_HUMAN Nucleoprotein TPR OS=Homo sapiens OX=9606 GN=TPR PE=1 SV=3	RDC(BTD[C])QEQAK|	2|	1.37|	1.37	NA	2	1
241	Q9Y490	1023	TLN1	TLN1_HUMAN Talin-1 OS=Homo sapiens OX=9606 GN=TLN1 PE=1 SV=3	|ASVPTIQDQASAMQLSQC(BTD[C])AK	|1	|1.37	1.37	NA	1	1
242	P09211	48	GSTP1	GSTP1_HUMAN Glutathione S-transferase P OS=Homo sapiens OX=9606 GN=GSTP1 PE=1 SV=2	|SC(BTD[C])LYGQLPK	|1	|1.37	1.37	NA	1	1
243	Q92598	140	HSPH1	HS105_HUMAN Heat shock protein 105 kDa OS=Homo sapiens OX=9606 GN=HSPH1 PE=1 SV=1	|KPVTDC(BTD[C])VISVPSFFTDAER	|1	|1.37	1.37	NA	1	1
244	Q13907	39	IDI1	IDI1_HUMAN Isopentenyl-diphosphate Delta-isomerase 1 OS=Homo sapiens OX=9606 GN=IDI1 PE=1 SV=2	KNC(BTD[C])HLNENIEK|KNC(BTD[C])HLNENIEK	3|2	1.22|1.515	1.3675	0.2086	5	2
245	O95249	34	GOSR1	GOSR1_HUMAN Golgi SNAP receptor complex member 1 OS=Homo sapiens OX=9606 GN=GOSR1 PE=1 SV=1	LC(BTD[C])TSYSHSSTR|	1|	1.36|	1.36	NA	1	1
246	O75369	2333	FLNB	FLNB_HUMAN Filamin-B OS=Homo sapiens OX=9606 GN=FLNB PE=1 SV=2	VHSPSGAVEEC(BTD[C])HVSELEPDK|VHSPSGAVEEC(BTD[C])HVSELEPDK	2|2	1.33|1.39	1.36	0.04243	4	2
247	P63279	75	UBE2I	UBC9_HUMAN SUMO-conjugating enzyme UBC9 OS=Homo sapiens OX=9606 GN=UBE2I PE=1 SV=1	DDYPSSPPKC(BTD[C])K|	1|	1.35|	1.35	NA	1	1
248	P62888	52	RPL30	RL30_HUMAN 60S ribosomal protein L30 OS=Homo sapiens OX=9606 GN=RPL30 PE=1 SV=2	ANNC(BTD[C])PALR|	2|	1.35|	1.35	NA	2	1
249	Q8TBC4	139	UBA3	UBA3_HUMAN NEDD8-activating enzyme E1 catalytic subunit OS=Homo sapiens OX=9606 GN=UBA3 PE=1 SV=2	VPNC(BTD[C])NVVPHFNK|VPNC(BTD[C])NVVPHFNK	3|3	1.05|1.65	1.35	0.42426	6	2
250	Q01469	67	FABP5	FABP5_HUMAN Fatty acid-binding protein 5 OS=Homo sapiens OX=9606 GN=FABP5 PE=1 SV=3	|TTQFSC(BTD[C])TLGEK	|2	|1.35	1.35	NA	2	1
251	P30041	47	PRDX6	PRDX6_HUMAN Peroxiredoxin-6 OS=Homo sapiens OX=9606 GN=PRDX6 PE=1 SV=3	|FTPVC(BTD[C])TTELGR	|2	|1.35	1.35	NA	2	1	Active site
252	Q9H3K6	59	BOLA2	BOLA2_HUMAN BolA-like protein 2 OS=Homo sapiens OX=9606 GN=BOLA2 PE=1 SV=1	|LVNAC(BTD[C])LAEELPHIHAFEQK	|1	|1.35	1.35	NA	1	1
253	P68036	86	UBE2L3	UB2L3_HUMAN Ubiquitin-conjugating enzyme E2 L3 OS=Homo sapiens OX=9606 GN=UBE2L3 PE=1 SV=1	|GQVC(BTD[C])LPVISAENWKPATK	|1	|1.35	1.35	NA	1	1	Active site
254	P35754	26	GLRX	GLRX1_HUMAN Glutaredoxin-1 OS=Homo sapiens OX=9606 GN=GLRX PE=1 SV=2	KPTCPYC(BTD[C])R PTCPYC(BTD[C])R|KPTCPYC(BTD[C])R FIKPTCPYC(BTD[C])R	2|3	1.61|1.08	1.345	0.37477	5	2	Disulfide bond
255	Q14980	1367	NUMA1	NUMA1_HUMAN Nuclear mitotic apparatus protein 1 OS=Homo sapiens OX=9606 GN=NUMA1 PE=1 SV=2	HLC(BTD[C])QQLQAEQAAAEK|HLC(BTD[C])QQLQAEQAAAEK	1|1	1.29|1.4	1.345	0.07778	2	2
256	P60174	255	TPI1	TPIS_HUMAN Triosephosphate isomerase OS=Homo sapiens OX=9606 GN=TPI1 PE=1 SV=3	IIYGGSVTGATC(BTD[C])K|IIYGGSVTGATC(BTD[C])K	3|2	1.66|1.03	1.345	0.44548	5	2
257	O14818	91	PSMA7	PSA7_HUMAN Proteasome subunit alpha type-7 OS=Homo sapiens OX=9606 GN=PSMA7 PE=1 SV=1	VEC(BTD[C])QSHR|	2|	1.34|	1.34	NA	2	1
258	Q9HB07	305	C12orf10	MYG1_HUMAN UPF0160 protein MYG1, mitochondrial OS=Homo sapiens OX=9606 GN=C12orf10 PE=1 SV=2	|IQC(BTD[C])VPK	|1	|1.34	1.34	NA	1	1
259	Q01469	43	FABP5	FABP5_HUMAN Fatty acid-binding protein 5 OS=Homo sapiens OX=9606 GN=FABP5 PE=1 SV=3	AKPDC(BTD[C])IITCDGK KPDC(BTD[C])IITCDGK|AKPDC(BTD[C])IITCDGK KPDC(BTD[C])IITCDGK	3|4	1.26|1.415	1.3375	0.1096	7	2
260	P10809	237	HSPD1	CH60_HUMAN 60 kDa heat shock protein, mitochondrial OS=Homo sapiens OX=9606 GN=HSPD1 PE=1 SV=2	GQKC(BTD[C])EFQDAYVLLSEK|GQKC(BTD[C])EFQDAYVLLSEK	1|2	1.55|1.12	1.335	0.30406	3	2
261	O43399	74	TPD52L2	TPD54_HUMAN Tumor protein D54 OS=Homo sapiens OX=9606 GN=TPD52L2 PE=1 SV=2	ERHC(BTD[C])GELK|	2|	1.335|	1.335	NA	2	1
262	Q9UKM9	51	RALY	RALY_HUMAN RNA-binding protein Raly OS=Homo sapiens OX=9606 GN=RALY PE=1 SV=1	VAGC(BTD[C])SVHK|	1|	1.33|	1.33	NA	1	1
263	Q9NZI8	257	IGF2BP1	IF2B1_HUMAN Insulin-like growth factor 2 mRNA-binding protein 1 OS=Homo sapiens OX=9606 GN=IGF2BP1 PE=1 SV=2	AISVHSTPEGCSSAC(BTD[C])K|AISVHSTPEGCSSAC(BTD[C])K	1|2	1.24|1.42	1.33	0.12728	3	2
264	P21333	2160	FLNA	FLNA_HUMAN Filamin-A OS=Homo sapiens OX=9606 GN=FLNA PE=1 SV=4	|APSVANVGSHC(BTD[C])DLSLK	|4	|1.33	1.33	NA	4	1
265	P60174	104	TPI1	TPIS_HUMAN Triosephosphate isomerase OS=Homo sapiens OX=9606 GN=TPI1 PE=1 SV=3	IAVAAQNC(BTD[C])YK|IAVAAQNC(BTD[C])YK	2|2	1.31|1.34	1.325	0.02121	4	2
266	Q9Y3E5	86	PTRH2	PTH2_HUMAN Peptidyl-tRNA hydrolase 2, mitochondrial OS=Homo sapiens OX=9606 GN=PTRH2 PE=1 SV=1	VAAQC(BTD[C])SHAAVSAYK|	1|	1.32|	1.32	NA	1	1
267	Q14980	658	NUMA1	NUMA1_HUMAN Nuclear mitotic apparatus protein 1 OS=Homo sapiens OX=9606 GN=NUMA1 PE=1 SV=2	|KVEELQAC(BTD[C])VETAR	|1	|1.32	1.32	NA	1	1
268	Q99832	29	CCT7	TCPH_HUMAN T-complex protein 1 subunit eta OS=Homo sapiens OX=9606 GN=CCT7 PE=1 SV=2	|ISAC(BTD[C])QVIAEAVR	|1	|1.32	1.32	NA	1	1
269	P04040	460	CAT	CATA_HUMAN Catalase OS=Homo sapiens OX=9606 GN=CAT PE=1 SV=3	RLC(BTD[C])ENIAGHLK LC(BTD[C])ENIAGHLK|RLC(BTD[C])ENIAGHLK LC(BTD[C])ENIAGHLK	19|14	1.26|1.37	1.315	0.07778	33	2
270	P09382	43	LGALS1	LEG1_HUMAN Galectin-1 OS=Homo sapiens OX=9606 GN=LGALS1 PE=1 SV=2	NNLC(BTD[C])LHFNPR SNNLC(BTD[C])LHFNPR LC(BTD[C])LHFNPR NLC(BTD[C])LHFNPR DSNNLC(BTD[C])LHFNPR|NNLC(BTD[C])LHFNPR SNNLC(BTD[C])LHFNPR NLC(BTD[C])LHFNPR DSNNLC(BTD[C])LHFNPR	7|11	1.33|1.3	1.315	0.02121	18	2
271	O15523	296	DDX3Y	DDX3Y_HUMAN ATP-dependent RNA helicase DDX3Y OS=Homo sapiens OX=9606 GN=DDX3Y PE=1 SV=2	VRPC(BTD[C])VVYGGADIGQQIR|VRPC(BTD[C])VVYGGADIGQQIR	2|2	1.11|1.52	1.315	0.28991	4	2
272	P11177	249	PDHB	ODPB_HUMAN Pyruvate dehydrogenase E1 component subunit beta, mitochondrial OS=Homo sapiens OX=9606 GN=PDHB PE=1 SV=3	PVGHC(BTD[C])LEAAAVLSK|	1|	1.31|	1.31	NA	1	1
273	P07814	697	EPRS	SYEP_HUMAN Bifunctional glutamate/proline--tRNA ligase OS=Homo sapiens OX=9606 GN=EPRS PE=1 SV=5	|EAPC(BTD[C])VLIYIPDGHTK	|1	|1.31	1.31	NA	1	1
274	Q9NZM1	409	MYOF	MYOF_HUMAN Myoferlin OS=Homo sapiens OX=9606 GN=MYOF PE=1 SV=1	KVC(BTD[C])TNIIEK|KVC(BTD[C])TNIIEK	3|1	1.31|1.3	1.305	0.00707	4	2
275	Q15041	109	ARL6IP1	AR6P1_HUMAN ADP-ribosylation factor-like protein 6-interacting protein 1 OS=Homo sapiens OX=9606 GN=ARL6IP1 PE=1 SV=2	FHEIC(BTD[C])SNLVK|FHEIC(BTD[C])SNLVK	2|2	1.06|1.55	1.305	0.34648	4	2
276	P12955	183	PEPD	PEPD_HUMAN Xaa-Pro dipeptidase OS=Homo sapiens OX=9606 GN=PEPD PE=1 SV=3	FEVNNTILHPEIVEC(BTD[C])R|FEVNNTILHPEIVEC(BTD[C])R	1|1	1.13|1.47	1.3	0.24042	2	2
277	P36578	208	RPL4	RL4_HUMAN 60S ribosomal protein L4 OS=Homo sapiens OX=9606 GN=RPL4 PE=1 SV=5	GPC(BTD[C])IIYNEDNGIIK|	1|	1.3|	1.3	NA	1	1
278	P43487	99	RANBP1	RANG_HUMAN Ran-specific GTPase-activating protein OS=Homo sapiens OX=9606 GN=RANBP1 PE=1 SV=1	|IC(BTD[C])ANHYITPMMELKPNAGSDR	|1	|1.3	1.3	NA	1	1
279	P09110	381	ACAA1	THIK_HUMAN 3-ketoacyl-CoA thiolase, peroxisomal OS=Homo sapiens OX=9606 GN=ACAA1 PE=1 SV=2	VNPLGGAVALGHPLGC(BTD[C])TGAR|VNPLGGAVALGHPLGC(BTD[C])TGAR	1|1	1.42|1.17	1.295	0.17678	2	2
280	P30086	133	PEBP1	PEBP1_HUMAN Phosphatidylethanolamine-binding protein 1 OS=Homo sapiens OX=9606 GN=PEBP1 PE=1 SV=3	PLKC(BTD[C])DEPILSNR|PLKC(BTD[C])DEPILSNR	1|1	1.19|1.39	1.29	0.14142	2	2
281	Q13162	245	PRDX4	PRDX4_HUMAN Peroxiredoxin-4 OS=Homo sapiens OX=9606 GN=PRDX4 PE=1 SV=1	HGEVC(BTD[C])PAGWKPGSETIIPDPAGK|	1|	1.29|	1.29	NA	1	1	Disulfide bond
282	P12004	162	PCNA	PCNA_HUMAN Proliferating cell nuclear antigen OS=Homo sapiens OX=9606 GN=PCNA PE=1 SV=1	DLSHIGDAVVISC(BTD[C])AK|DLSHIGDAVVISC(BTD[C])AK	2|1	1.35|1.23	1.29	0.08485	3	2
283	Q8TF46	723	DIS3L	DI3L1_HUMAN DIS3-like exonuclease 1 OS=Homo sapiens OX=9606 GN=DIS3L PE=1 SV=2	EC(BTD[C])AKAK|	1|	1.29|	1.29	NA	1	1
284	P83731	36	RPL24	RL24_HUMAN 60S ribosomal protein L24 OS=Homo sapiens OX=9606 GN=RPL24 PE=1 SV=1	|AKC(BTD[C])ESAFLSK	|1	|1.29	1.29	NA	1	1
285	P43243	821	MATR3	MATR3_HUMAN Matrin-3 OS=Homo sapiens OX=9606 GN=MATR3 PE=1 SV=2	NTHC(BTD[C])SSLPHYQK|NTHC(BTD[C])SSLPHYQK	4|1	1.255|1.32	1.2875	0.04596	5	2
286	O75369	2115	FLNB	FLNB_HUMAN Filamin-B OS=Homo sapiens OX=9606 GN=FLNB PE=1 SV=2	APSVATVGSIC(BTD[C])DLNLK|	3|	1.28|	1.28	NA	3	1
287	P34932	779	HSPA4	HSP74_HUMAN Heat shock 70 kDa protein 4 OS=Homo sapiens OX=9606 GN=HSPA4 PE=1 SV=4	ELTSTC(BTD[C])SPIISKPK|	2|	1.27|	1.27	NA	2	1
288	Q16836	211	HADH	HCDH_HUMAN Hydroxyacyl-coenzyme A dehydrogenase, mitochondrial OS=Homo sapiens OX=9606 GN=HADH PE=1 SV=3	HPVSC(BTD[C])K|HPVSC(BTD[C])K	2|3	1.2|1.34	1.27	0.09899	5	2
289	P30050	162	RPL12	RL12_HUMAN 60S ribosomal protein L12 OS=Homo sapiens OX=9606 GN=RPL12 PE=1 SV=1	HPHDIIDDINSGAVEC(BTD[C])PAS|HPHDIIDDINSGAVEC(BTD[C])PAS	1|4	1.47|1.06	1.265	0.28991	5	2
290	P33992	570	MCM5	MCM5_HUMAN DNA replication licensing factor MCM5 OS=Homo sapiens OX=9606 GN=MCM5 PE=1 SV=5	VKC(BTD[C])GPR|	1|	1.26|	1.26	NA	1	1
291	P23919	31	DTYMK	KTHY_HUMAN Thymidylate kinase OS=Homo sapiens OX=9606 GN=DTYMK PE=1 SV=4	LC(BTD[C])AAGHR|	1|	1.26|	1.26	NA	1	1
292	Q15149	1156	PLEC	PLEC_HUMAN Plectin OS=Homo sapiens OX=9606 GN=PLEC PE=1 SV=3	LPLDKEPAREC(BTD[C])AQR|	3|	1.26|	1.26	NA	3	1
293	Q14847	29	LASP1	LASP1_HUMAN LIM and SH3 domain protein 1 OS=Homo sapiens OX=9606 GN=LASP1 PE=1 SV=2	AC(BTD[C])FHCETCK|AC(BTD[C])FHCETCK	3|4	1.24|1.28	1.26	0.02828	7	2
294	P38606	394	ATP6V1A	VATA_HUMAN V-type proton ATPase catalytic subunit A OS=Homo sapiens OX=9606 GN=ATP6V1A PE=1 SV=2	VKC(BTD[C])LGNPER|VKC(BTD[C])LGNPER	3|4	1.2|1.32	1.26	0.08485	7	2
295	Q13838	165	DDX39B	DX39B_HUMAN Spliceosome RNA helicase DDX39B OS=Homo sapiens OX=9606 GN=DDX39B PE=1 SV=1	NC(BTD[C])PHIVVGTPGR|NC(BTD[C])PHIVVGTPGR	3|2	1.24|1.28	1.26	0.02828	5	2
296	O60313	786	OPA1	OPA1_HUMAN Dynamin-like 120 kDa protein, mitochondrial OS=Homo sapiens OX=9606 GN=OPA1 PE=1 SV=3	TQEQC(BTD[C])VHNETK|	1|	1.26|	1.26	NA	1	1
297	P04406	156	GAPDH	G3P_HUMAN Glyceraldehyde-3-phosphate dehydrogenase OS=Homo sapiens OX=9606 GN=GAPDH PE=1 SV=3	IISNASCTTNC(BTD[C])LAPLAK|IISNASCTTNC(BTD[C])LAPLAK	2|2	1.25|1.265	1.2575	0.01061	4	2
298	P09211	15	GSTP1	GSTP1_HUMAN Glutathione S-transferase P OS=Homo sapiens OX=9606 GN=GSTP1 PE=1 SV=2	GRC(BTD[C])AALR|GRC(BTD[C])AALR	2|3	1.24|1.26	1.25	0.01414	5	2
299	Q6IBS0	141	TWF2	TWF2_HUMAN Twinfilin-2 OS=Homo sapiens OX=9606 GN=TWF2 PE=1 SV=2	|HLSSC(BTD[C])AAPAPLTSAER	|1	|1.25	1.25	NA	1	1
300	P00390	467	GSR	GSHR_HUMAN Glutathione reductase, mitochondrial OS=Homo sapiens OX=9606 GN=GSR PE=1 SV=2	MVC(BTD[C])ANKEEK|MVC(BTD[C])ANKEEK MVC(BTD[C])ANK	7|8	1.25|1.245	1.2475	0.00354	15	2
301	P10599	35	TXN	THIO_HUMAN Thioredoxin OS=Homo sapiens OX=9606 GN=TXN PE=1 SV=3	WCGPC(BTD[C])K ATWCGPC(BTD[C])K SATWCGPC(BTD[C])K FSATWCGPC(BTD[C])K|SATWCGPC(BTD[C])K FSATWCGPC(BTD[C])K	5|3	1.37|1.12	1.245	0.17678	8	2	Active site, Disulfide bond
302	P34932	140	HSPA4	HSP74_HUMAN Heat shock 70 kDa protein 4 OS=Homo sapiens OX=9606 GN=HSPA4 PE=1 SV=4	KPVVDC(BTD[C])VVSVPCFYTDAER|KPVVDC(BTD[C])VVSVPCFYTDAER	1|1	1.17|1.32	1.245	0.10607	2	2
303	Q8IXI1	185	RHOT2	MIRO2_HUMAN Mitochondrial Rho GTPase 2 OS=Homo sapiens OX=9606 GN=RHOT2 PE=1 SV=2	QLRPAC(BTD[C])AQALTR|	1|	1.24|	1.24	NA	1	1
304	Q96QK1	286	VPS35	VPS35_HUMAN Vacuolar protein sorting-associated protein 35 OS=Homo sapiens OX=9606 GN=VPS35 PE=1 SV=2	|AC(BTD[C])AELHQNVNVK	|1	|1.24	1.24	NA	1	1
305	P39023	336	RPL3	RL3_HUMAN 60S ribosomal protein L3 OS=Homo sapiens OX=9606 GN=RPL3 PE=1 SV=2	|GC(BTD[C])VVGTK	|1	|1.24	1.24	NA	1	1
306	Q71UM5	77	RPS27L	RS27L_HUMAN 40S ribosomal protein S27-like OS=Homo sapiens OX=9606 GN=RPS27L PE=1 SV=3	LTEGC(BTD[C])SFR|	1|	1.23|	1.23	NA	1	1
307	P28066	165	PSMA5	PSA5_HUMAN Proteasome subunit alpha type-5 OS=Homo sapiens OX=9606 GN=PSMA5 PE=1 SV=3	GPQLFHMDPSGTFVQC(BTD[C])DAR|	2|	1.23|	1.23	NA	2	1
308	P05388	119	RPLP0	RLA0_HUMAN 60S acidic ribosomal protein P0 OS=Homo sapiens OX=9606 GN=RPLP0 PE=1 SV=1	AGAIAPC(BTD[C])EVTVPAQNTGLGPEK|AGAIAPC(BTD[C])EVTVPAQNTGLGPEK	1|2	1.21|1.25	1.23	0.02828	3	2
309	P17081	163	RHOQ	RHOQ_HUMAN Rho-related GTP-binding protein RhoQ OS=Homo sapiens OX=9606 GN=RHOQ PE=1 SV=2	|YVEC(BTD[C])SALTQK	|2	|1.23	1.23	NA	2	1
310	P48506	152	GCLC	GSH1_HUMAN Glutamate--cysteine ligase catalytic subunit OS=Homo sapiens OX=9606 GN=GCLC PE=1 SV=2	|LGC(BTD[C])PGFTLPEVKPNPVEGGASK	|1	|1.23	1.23	NA	1	1
311	Q9ULV4	343	CORO1C	COR1C_HUMAN Coronin-1C OS=Homo sapiens OX=9606 GN=CORO1C PE=1 SV=1	KC(BTD[C])EPIIMTVPR|KC(BTD[C])EPIIMTVPR	2|1	1.455|1.0	1.2275	0.32173	3	2
312	Q01082	112	SPTBN1	SPTB2_HUMAN Spectrin beta chain, non-erythrocytic 1 OS=Homo sapiens OX=9606 GN=SPTBN1 PE=1 SV=2	IHC(BTD[C])LENVDK|IHC(BTD[C])LENVDK	5|1	1.07|1.38	1.225	0.2192	6	2
313	Q96EP5	63	DAZAP1	DAZP1_HUMAN DAZ-associated protein 1 OS=Homo sapiens OX=9606 GN=DAZAP1 PE=1 SV=1	FKDPNC(BTD[C])VGTVLASR|FKDPNC(BTD[C])VGTVLASR	1|1	0.96|1.49	1.225	0.37477	2	2
314	P62316	63	SNRPD2	SMD2_HUMAN Small nuclear ribonucleoprotein Sm D2 OS=Homo sapiens OX=9606 GN=SNRPD2 PE=1 SV=1	HC(BTD[C])NMVLENVK|HC(BTD[C])NMVLENVK	7|3	1.43|1.01	1.22	0.29698	10	2
315	P33764	30	S100A3	S10A3_HUMAN Protein S100-A3 OS=Homo sapiens OX=9606 GN=S100A3 PE=1 SV=1	YKLC(BTD[C])QAELK|	1|	1.22|	1.22	NA	1	1	Disulfide bond
316	P63244	207	RACK1	RACK1_HUMAN Receptor of activated protein C kinase 1 OS=Homo sapiens OX=9606 GN=RACK1 PE=1 SV=3	TNHIGHTGYLNTVTVSPDGSLC(BTD[C])ASGGK|	2|	1.22|	1.22	NA	2	1
317	P23526	195	AHCY	SAHH_HUMAN Adenosylhomocysteinase OS=Homo sapiens OX=9606 GN=AHCY PE=1 SV=4	FDNLYGC(BTD[C])R|	1|	1.22|	1.22	NA	1	1
318	Q9H4A4	85	RNPEP	AMPB_HUMAN Aminopeptidase B OS=Homo sapiens OX=9606 GN=RNPEP PE=1 SV=2	|LDSHPC(BTD[C])LEVTAAALR	|1	|1.22	1.22	NA	1	1
319	P22059	609	OSBP	OSBP1_HUMAN Oxysterol-binding protein 1 OS=Homo sapiens OX=9606 GN=OSBP PE=1 SV=1	TGDKC(BTD[C])NLK|	1|	1.21|	1.21	NA	1	1
320	Q9NTK5	187	OLA1	OLA1_HUMAN Obg-like ATPase 1 OS=Homo sapiens OX=9606 GN=OLA1 PE=1 SV=2	LKPEYDIMC(BTD[C])K|	2|	1.21|	1.21	NA	2	1
321	P62701	65	RPS4X	RS4X_HUMAN 40S ribosomal protein S4, X isoform OS=Homo sapiens OX=9606 GN=RPS4X PE=1 SV=2	|KIC(BTD[C])MQR	|1	|1.21	1.21	NA	1	1
322	Q13501	44	SQSTM1	SQSTM_HUMAN Sequestosome-1 OS=Homo sapiens OX=9606 GN=SQSTM1 PE=1 SV=1	GPGPC(BTD[C])ER|	2|	1.2|	1.2	NA	2	1
323	Q01518	416	CAP1	CAP1_HUMAN Adenylyl cyclase-associated protein 1 OS=Homo sapiens OX=9606 GN=CAP1 PE=1 SV=5	TDGC(BTD[C])HAYLSK|	4|	1.2|	1.2	NA	4	1
324	Q99424	412	ACOX2	ACOX2_HUMAN Peroxisomal acyl-coenzyme A oxidase 2 OS=Homo sapiens OX=9606 GN=ACOX2 PE=1 SV=1	AC(BTD[C])GGHGYSK|	2|	1.2|	1.2	NA	2	1
325	P31689	302	DNAJA1	DNJA1_HUMAN DnaJ homolog subfamily A member 1 OS=Homo sapiens OX=9606 GN=DNAJA1 PE=1 SV=2	|HGDIKC(BTD[C])VLNEGMPIYR	|1	|1.2	1.2	NA	1	1
326	O94973	491	AP2A2	AP2A2_HUMAN AP-2 complex subunit alpha-2 OS=Homo sapiens OX=9606 GN=AP2A2 PE=1 SV=2	|TVFEALQAPAC(BTD[C])HENLVK	|1	|1.2	1.2	NA	1	1
327	P37235	38	HPCAL1	HPCL1_HUMAN Hippocalcin-like protein 1 OS=Homo sapiens OX=9606 GN=HPCAL1 PE=1 SV=3	DC(BTD[C])PTGHLTVDEFKK|DC(BTD[C])PTGHLTVDEFKK DC(BTD[C])PTGHLTVDEFK	3|2	0.82|1.565	1.1925	0.52679	5	2
328	P00390	461	GSR	GSHR_HUMAN Glutathione reductase, mitochondrial OS=Homo sapiens OX=9606 GN=GSR PE=1 SV=2	TKC(BTD[C])VMK|TKC(BTD[C])VMK	2|2	1.215|1.17	1.1925	0.03182	4	2
329	O00410	972	IPO5	IPO5_HUMAN Importin-5 OS=Homo sapiens OX=9606 GN=IPO5 PE=1 SV=4	TKENVNATENC(BTD[C])ISAVGK|	1|	1.19|	1.19	NA	1	1
330	Q86WA6	234	BPHL	BPHL_HUMAN Valacyclovir hydrolase OS=Homo sapiens OX=9606 GN=BPHL PE=1 SV=1	|VQC(BTD[C])PALIVHGEKDPLVPR	|1	|1.19	1.19	NA	1	1
331	P22314	179	UBA1	UBA1_HUMAN Ubiquitin-like modifier-activating enzyme 1 OS=Homo sapiens OX=9606 GN=UBA1 PE=1 SV=3	VGEFC(BTD[C])HNR|VGEFC(BTD[C])HNR	2|2	1.21|1.16	1.185	0.03536	4	2
332	P23528	39	CFL1	COF1_HUMAN Cofilin-1 OS=Homo sapiens OX=9606 GN=CFL1 PE=1 SV=3	FC(BTD[C])LSEDKK LFC(BTD[C])LSEDKK FC(BTD[C])LSEDK VLFC(BTD[C])LSEDKK AVLFC(BTD[C])LSEDKK LFC(BTD[C])LSEDK|FC(BTD[C])LSEDKK LFC(BTD[C])LSEDKK VLFC(BTD[C])LSEDKK AVLFC(BTD[C])LSEDKK	9|9	1.33|1.04	1.185	0.20506	18	2
333	O60841	1158	EIF5B	IF2P_HUMAN Eukaryotic translation initiation factor 5B OS=Homo sapiens OX=9606 GN=EIF5B PE=1 SV=4	KGQEVC(BTD[C])VK|KGQEVC(BTD[C])VK	3|2	1.27|1.09	1.18	0.12728	5	2
334	Q52LJ0	113	FAM98B	FA98B_HUMAN Protein FAM98B OS=Homo sapiens OX=9606 GN=FAM98B PE=1 SV=2	KEDC(BTD[C])LK|	1|	1.18|	1.18	NA	1	1
335	P32969	134	RPL9	RL9_HUMAN 60S ribosomal protein L9 OS=Homo sapiens OX=9606 GN=RPL9 PE=1 SV=1	MRPGVAC(BTD[C])SVSQAQK|MRPGVAC(BTD[C])SVSQAQK	4|3	1.16|1.2	1.18	0.02828	7	2
336	P23396	119	RPS3	RS3_HUMAN 40S ribosomal protein S3 OS=Homo sapiens OX=9606 GN=RPS3 PE=1 SV=2	AC(BTD[C])YGVLR|	1|	1.18|	1.18	NA	1	1
337	Q12906	203	ILF3	ILF3_HUMAN Interleukin enhancer-binding factor 3 OS=Homo sapiens OX=9606 GN=ILF3 PE=1 SV=3	|QKC(BTD[C])LAALASLR	|2	|1.18	1.18	NA	2	1
338	O00422	26	SAP18	SAP18_HUMAN Histone deacetylase complex subunit SAP18 OS=Homo sapiens OX=9606 GN=SAP18 PE=1 SV=1	|TC(BTD[C])PLLLR	|1	|1.18	1.18	NA	1	1
339	P11142	603	HSPA8	HSP7C_HUMAN Heat shock cognate 71 kDa protein OS=Homo sapiens OX=9606 GN=HSPA8 PE=1 SV=1	ELEKVC(BTD[C])NPIITK VC(BTD[C])NPIITK|ELEKVC(BTD[C])NPIITK VC(BTD[C])NPIITK	3|4	0.94|1.415	1.1775	0.33588	7	2
340	Q92598	650	HSPH1	HS105_HUMAN Heat shock protein 105 kDa OS=Homo sapiens OX=9606 GN=HSPH1 PE=1 SV=1	DKLC(BTD[C])GPYEK|	2|	1.17|	1.17	NA	2	1
341	Q01082	604	SPTBN1	SPTB2_HUMAN Spectrin beta chain, non-erythrocytic 1 OS=Homo sapiens OX=9606 GN=SPTBN1 PE=1 SV=2	FATDGEGYKPC(BTD[C])DPQVIR|	2|	1.17|	1.17	NA	2	1
342	P08865	163	RPSA	RSSA_HUMAN 40S ribosomal protein SA OS=Homo sapiens OX=9606 GN=RPSA PE=1 SV=4	YVDIAIPC(BTD[C])NNK|	2|	1.17|	1.17	NA	2	1
343	P60866	36	RPS20	RS20_HUMAN 40S ribosomal protein S20 OS=Homo sapiens OX=9606 GN=RPS20 PE=1 SV=1	|KVC(BTD[C])ADLIR VC(BTD[C])ADLIR	|3	|1.17	1.17	NA	3	1
344	P62873	25	GNB1	GBB1_HUMAN Guanine nucleotide-binding protein G(I)/G(S)/G(T) subunit beta-1 OS=Homo sapiens OX=9606 GN=GNB1 PE=1 SV=3	|KAC(BTD[C])ADATLSQITNNIDPVGR	|1	|1.17	1.17	NA	1	1
345	P14618	326	PKM	KPYM_HUMAN Pyruvate kinase PKM OS=Homo sapiens OX=9606 GN=PKM PE=1 SV=4	AGKPVIC(BTD[C])ATQMLESMIK PVIC(BTD[C])ATQMLESMIK|AGKPVIC(BTD[C])ATQMLESMIK PVIC(BTD[C])ATQMLESMIK	20|15	1.025|1.31	1.1675	0.20153	35	2
346	Q6IS14	73	EIF5AL1	IF5AL_HUMAN Eukaryotic translation initiation factor 5A-1-like OS=Homo sapiens OX=9606 GN=EIF5AL1 PE=2 SV=2	KYEDIC(BTD[C])PSTHNMDVPNIK YEDIC(BTD[C])PSTHNMDVPNIK|KYEDIC(BTD[C])PSTHNMDVPNIK YEDIC(BTD[C])PSTHNMDVPNIK	7|2	1.16|1.165	1.1625	0.00354	9	2
347	P12931	248	SRC	SRC_HUMAN Proto-oncogene tyrosine-protein kinase Src OS=Homo sapiens OX=9606 GN=SRC PE=1 SV=3	LTTVC(BTD[C])PTSKPQTQGLAK|LTTVC(BTD[C])PTSKPQTQGLAK	1|1	1.16|1.15	1.155	0.00707	2	2
348	P55209	388	NAP1L1	NP1L1_HUMAN Nucleosome assembly protein 1-like 1 OS=Homo sapiens OX=9606 GN=NAP1L1 PE=1 SV=1	KDQNPAEC(BTD[C])K|	1|	1.15|	1.15	NA	1	1	Modified residue
349	P46100	450	ATRX	ATRX_HUMAN Transcriptional regulator ATRX OS=Homo sapiens OX=9606 GN=ATRX PE=1 SV=5	KGEKPC(BTD[C])ALEK|	1|	1.15|	1.15	NA	1	1
350	Q99426	165	TBCB	TBCB_HUMAN Tubulin-folding cofactor B OS=Homo sapiens OX=9606 GN=TBCB PE=1 SV=2	|AQASSIPVGSRC(BTD[C])EVR	|1	|1.15	1.15	NA	1	1
351	Q6UXN9	141	WDR82	WDR82_HUMAN WD repeat-containing protein 82 OS=Homo sapiens OX=9606 GN=WDR82 PE=1 SV=1	|SPNC(BTD[C])QGLMHLQGK	|1	|1.15	1.15	NA	1	1
352	P06744	404	GPI	G6PI_HUMAN Glucose-6-phosphate isomerase OS=Homo sapiens OX=9606 GN=GPI PE=1 SV=4	MIPC(BTD[C])DFLIPVQTQHPIR|MIPC(BTD[C])DFLIPVQTQHPIR	4|9	1.17|1.12	1.145	0.03536	13	2
353	P67936	154	TPM4	TPM4_HUMAN Tropomyosin alpha-4 chain OS=Homo sapiens OX=9606 GN=TPM4 PE=1 SV=3	AEVSELKC(BTD[C])GDLEEELK|	3|	1.14|	1.14	NA	3	1
354	P49721	163	PSMB2	PSB2_HUMAN Proteasome subunit beta type-2 OS=Homo sapiens OX=9606 GN=PSMB2 PE=1 SV=1	|KC(BTD[C])LEELQK	|1	|1.14	1.14	NA	1	1
355	Q9H115	164	NAPB	SNAB_HUMAN Beta-soluble NSF attachment protein OS=Homo sapiens OX=9606 GN=NAPB PE=1 SV=2	|GEESNSSANKC(BTD[C])LLK	|1	|1.14	1.14	NA	1	1
356	Q9UNS2	25	COPS3	CSN3_HUMAN COP9 signalosome complex subunit 3 OS=Homo sapiens OX=9606 GN=COPS3 PE=1 SV=3	|QLSAQGQMTQLC(BTD[C])ELINK	|1	|1.14	1.14	NA	1	1
357	P10809	442	HSPD1	CH60_HUMAN 60 kDa heat shock protein, mitochondrial OS=Homo sapiens OX=9606 GN=HSPD1 PE=1 SV=2	|AAVEEGIVLGGGC(BTD[C])ALLR	|2	|1.14	1.14	NA	2	1
358	Q9NZM1	1919	MYOF	MYOF_HUMAN Myoferlin OS=Homo sapiens OX=9606 GN=MYOF PE=1 SV=1	SPEKC(BTD[C])R|SPEKC(BTD[C])R	4|2	1.12|1.155	1.1375	0.02475	6	2
359	Q14974	543	KPNB1	IMB1_HUMAN Importin subunit beta-1 OS=Homo sapiens OX=9606 GN=KPNB1 PE=1 SV=2	NSAKDC(BTD[C])YPAVQK|NSAKDC(BTD[C])YPAVQK	1|1	1.34|0.93	1.135	0.28991	2	2
360	P63000	105	RAC1	RAC1_HUMAN Ras-related C3 botulinum toxin substrate 1 OS=Homo sapiens OX=9606 GN=RAC1 PE=1 SV=1	HHC(BTD[C])PNTPIILVGTK|	4|	1.135|	1.135	NA	4	1
361	Q05519	455	SRSF11	SRS11_HUMAN Serine/arginine-rich splicing factor 11 OS=Homo sapiens OX=9606 GN=SRSF11 PE=1 SV=1	TKEC(BTD[C])SVEK|	2|	1.13|	1.13	NA	2	1
362	P34897	241	SHMT2	GLYM_HUMAN Serine hydroxymethyltransferase, mitochondrial OS=Homo sapiens OX=9606 GN=SHMT2 PE=1 SV=3	MREVC(BTD[C])DEVK|	1|	1.13|	1.13	NA	1	1
363	O60832	74	DKC1	DKC1_HUMAN H/ACA ribonucleoprotein complex subunit DKC1 OS=Homo sapiens OX=9606 GN=DKC1 PE=1 SV=3	TTHYTPLAC(BTD[C])GSNPLK|TTHYTPLAC(BTD[C])GSNPLK	2|3	1.17|1.09	1.13	0.05657	5	2
364	P35579	91	MYH9	MYH9_HUMAN Myosin-9 OS=Homo sapiens OX=9606 GN=MYH9 PE=1 SV=4	VEDMAELTC(BTD[C])LNEASVLHNLK|VEDMAELTC(BTD[C])LNEASVLHNLK	2|1	0.96|1.3	1.13	0.24042	3	2
365	Q9BQA1	172	WDR77	MEP50_HUMAN Methylosome protein 50 OS=Homo sapiens OX=9606 GN=WDR77 PE=1 SV=1	|AHAAQVTC(BTD[C])VAASPHK	|1	|1.13	1.13	NA	1	1
366	P00558	316	PGK1	PGK1_HUMAN Phosphoglycerate kinase 1 OS=Homo sapiens OX=9606 GN=PGK1 PE=1 SV=3	TGQATVASGIPAGWMGLDC(BTD[C])GPESSKK TGQATVASGIPAGWMGLDC(BTD[C])GPESSK|TGQATVASGIPAGWMGLDC(BTD[C])GPESSKK	2|2	1.225|1.03	1.1275	0.13789	4	2
367	P23528	147	CFL1	COF1_HUMAN Cofilin-1 OS=Homo sapiens OX=9606 GN=CFL1 PE=1 SV=3	DRC(BTD[C])TLAEK HELQANCYEEVKDRC(BTD[C])TLAEK|DRC(BTD[C])TLAEK HELQANCYEEVKDRC(BTD[C])TLAEK	10|9	1.12|1.12	1.12	0	19	2
368	O75369	1952	FLNB	FLNB_HUMAN Filamin-B OS=Homo sapiens OX=9606 GN=FLNB PE=1 SV=2	DEPC(BTD[C])LLK|	1|	1.12|	1.12	NA	1	1
369	O75884	39	RBBP9	RBBP9_HUMAN Putative hydrolase RBBP9 OS=Homo sapiens OX=9606 GN=RBBP9 PE=1 SV=2	IPGFQC(BTD[C])LAK|	1|	1.12|	1.12	NA	1	1
370	O60716	516	CTNND1	CTND1_HUMAN Catenin delta-1 OS=Homo sapiens OX=9606 GN=CTNND1 PE=1 SV=1	|EPNEDC(BTD[C])KPR	|1	|1.12	1.12	NA	1	1
371	P49790	404	NUP153	NU153_HUMAN Nuclear pore complex protein Nup153 OS=Homo sapiens OX=9606 GN=NUP153 PE=1 SV=2	|IDNKC(BTD[C])STGYEK	|1	|1.12	1.12	NA	1	1
372	P38117	42	ETFB	ETFB_HUMAN Electron transfer flavoprotein subunit beta OS=Homo sapiens OX=9606 GN=ETFB PE=1 SV=3	|HSMNPFC(BTD[C])EIAVEEAVR	|1	|1.12	1.12	NA	1	1
373	P63208	160	SKP1	SKP1_HUMAN S-phase kinase-associated protein 1 OS=Homo sapiens OX=9606 GN=SKP1 PE=1 SV=2	KENQWC(BTD[C])EEK|	4|	1.115|	1.115	NA	4	1
374	P23528	80	CFL1	COF1_HUMAN Cofilin-1 OS=Homo sapiens OX=9606 GN=CFL1 PE=1 SV=3	MLPDKDC(BTD[C])R|MLPDKDC(BTD[C])R	6|6	1.225|1.0	1.1125	0.1591	12	2
375	P30566	304	ADSL	PUR8_HUMAN Adenylosuccinate lyase OS=Homo sapiens OX=9606 GN=ADSL PE=1 SV=2	SERC(BTD[C])CSLAR|	1|	1.11|	1.11	NA	1	1
376	O00425	194	IGF2BP3	IF2B3_HUMAN Insulin-like growth factor 2 mRNA-binding protein 3 OS=Homo sapiens OX=9606 GN=IGF2BP3 PE=1 SV=2	QKPC(BTD[C])DLPLR|	2|	1.11|	1.11	NA	2	1
377	Q9Y3B8	137	REXO2	ORN_HUMAN Oligoribonuclease, mitochondrial OS=Homo sapiens OX=9606 GN=REXO2 PE=1 SV=3	QQTPPGLC(BTD[C])PLAGNSVHEDKK|QQTPPGLC(BTD[C])PLAGNSVHEDKK	2|1	1.15|1.07	1.11	0.05657	3	2
378	P43304	285	GPD2	GPDM_HUMAN Glycerol-3-phosphate dehydrogenase, mitochondrial OS=Homo sapiens OX=9606 GN=GPD2 PE=1 SV=3	AKC(BTD[C])VINATGPFTDSVR|AKC(BTD[C])VINATGPFTDSVR	1|2	1.11|1.11	1.11	0	3	2
379	Q14444	226	CAPRIN1	CAPR1_HUMAN Caprin-1 OS=Homo sapiens OX=9606 GN=CAPRIN1 PE=1 SV=2	EKPVC(BTD[C])GTTYK|EKPVC(BTD[C])GTTYK	3|3	1.16|1.04	1.1	0.08485	6	2
380	Q8WTS6	288	SETD7	SETD7_HUMAN Histone-lysine N-methyltransferase SETD7 OS=Homo sapiens OX=9606 GN=SETD7 PE=1 SV=1	YC(BTD[C])ASLGHK|	1|	1.1|	1.1	NA	1	1
381	Q13045	560	FLII	FLII_HUMAN Protein flightless-1 homolog OS=Homo sapiens OX=9606 GN=FLII PE=1 SV=2	AC(BTD[C])SAIHAVNLR|	1|	1.1|	1.1	NA	1	1
382	P62937	62	PPIA	PPIA_HUMAN Peptidyl-prolyl cis-trans isomerase A OS=Homo sapiens OX=9606 GN=PPIA PE=1 SV=2	FMC(BTD[C])QGGDFTR PGFMC(BTD[C])QGGDFTR IPGFMC(BTD[C])QGGDFTR IIPGFMC(BTD[C])QGGDFTR|MC(BTD[C])QGGDFTR FMC(BTD[C])QGGDFTR IPGFMC(BTD[C])QGGDFTR PGFMC(BTD[C])QGGDFTR	13|12	1.13|1.07	1.1	0.04243	25	2
383	P07814	1480	EPRS	SYEP_HUMAN Bifunctional glutamate/proline--tRNA ligase OS=Homo sapiens OX=9606 GN=EPRS PE=1 SV=5	SLC(BTD[C])IPFKPLCELQPGAK|	1|	1.1|	1.1	NA	1	1
384	P00352	370	ALDH1A1	AL1A1_HUMAN Retinal dehydrogenase 1 OS=Homo sapiens OX=9606 GN=ALDH1A1 PE=1 SV=2	LEC(BTD[C])GGGPWGNK|LEC(BTD[C])GGGPWGNK	3|4	1.1|1.09	1.095	0.00707	7	2
385	P35579	671	MYH9	MYH9_HUMAN Myosin-9 OS=Homo sapiens OX=9606 GN=MYH9 PE=1 SV=4	C(BTD[C])IIPNHEK|C(BTD[C])IIPNHEK	1|2	1.14|1.05	1.095	0.06364	3	2
386	O15144	120	ARPC2	ARPC2_HUMAN Actin-related protein 2/3 complex subunit 2 OS=Homo sapiens OX=9606 GN=ARPC2 PE=1 SV=1	NC(BTD[C])FASVFEK|	2|	1.095|	1.095	NA	2	1
387	P62249	25	RPS16	RS16_HUMAN 40S ribosomal protein S16 OS=Homo sapiens OX=9606 GN=RPS16 PE=1 SV=2	TAVAHC(BTD[C])K TATAVAHC(BTD[C])K|ATAVAHC(BTD[C])K	4|3	1.09|1.09	1.09	0	7	2
388	P49588	75	AARS	SYAC_HUMAN Alanine--tRNA ligase, cytoplasmic OS=Homo sapiens OX=9606 GN=AARS PE=1 SV=2	AANTQKC(BTD[C])IR|	1|	1.09|	1.09	NA	1	1
389	P49327	1759	FASN	FAS_HUMAN Fatty acid synthase OS=Homo sapiens OX=9606 GN=FASN PE=1 SV=3	C(BTD[C])LATHGR|C(BTD[C])LATHGR	2|1	1.23|0.95	1.09	0.19799	3	2
390	Q9BUF5	12	TUBB6	TBB6_HUMAN Tubulin beta-6 chain OS=Homo sapiens OX=9606 GN=TUBB6 PE=1 SV=1	EIVHIQAGQC(BTD[C])GNQIGTK|	1|	1.09|	1.09	NA	1	1
391	O75369	455	FLNB	FLNB_HUMAN Filamin-B OS=Homo sapiens OX=9606 GN=FLNB PE=1 SV=2	SPFVVQVGEACNPNAC(BTD[C])R|	1|	1.09|	1.09	NA	1	1
392	P62140	61	PPP1CB	PP1B_HUMAN Serine/threonine-protein phosphatase PP1-beta catalytic subunit OS=Homo sapiens OX=9606 GN=PPP1CB PE=1 SV=3	|IC(BTD[C])GDIHGQYTDLLR	|1	|1.09	1.09	NA	1	1
393	P21333	483	FLNA	FLNA_HUMAN Filamin-A OS=Homo sapiens OX=9606 GN=FLNA PE=1 SV=4	SPYTVTVGQACNPSAC(BTD[C])R|SPYTVTVGQACNPSAC(BTD[C])R	3|2	1.12|1.055	1.0875	0.04596	5	2
394	P27708	280	CAD	PYR1_HUMAN CAD protein OS=Homo sapiens OX=9606 GN=CAD PE=1 SV=3	GHNQPC(BTD[C])LLVGSGR|GHNQPC(BTD[C])LLVGSGR	1|4	0.8|1.375	1.0875	0.40659	5	2
395	Q9NZB2	14	FAM120A	F120A_HUMAN Constitutive coactivator of PPAR-gamma-like protein 1 OS=Homo sapiens OX=9606 GN=FAM120A PE=1 SV=2	HC(BTD[C])PSAVVPVELQK|HC(BTD[C])PSAVVPVELQK	2|3	1.07|1.1	1.085	0.02121	5	2
396	P37108	56	SRP14	SRP14_HUMAN Signal recognition particle 14 kDa protein OS=Homo sapiens OX=9606 GN=SRP14 PE=1 SV=2	FEPADNKC(BTD[C])LLR GTVEGFEPADNKC(BTD[C])LLR|GTVEGFEPADNKC(BTD[C])LLR	3|2	1.05|1.12	1.085	0.0495	5	2
397	P27361	178	MAPK3	MK03_HUMAN Mitogen-activated protein kinase 3 OS=Homo sapiens OX=9606 GN=MAPK3 PE=1 SV=4	DLKPSNLLINTTC(BTD[C])DLK|DLKPSNLLINTTC(BTD[C])DLK	1|2	1.07|1.095	1.0825	0.01768	3	2
398	P09651	175	HNRNPA1	ROA1_HUMAN Heterogeneous nuclear ribonucleoprotein A1 OS=Homo sapiens OX=9606 GN=HNRNPA1 PE=1 SV=5	YHTVNGHNC(BTD[C])EVR|	1|	1.08|	1.08	NA	1	1
399	O00231	289	PSMD11	PSD11_HUMAN 26S proteasome non-ATPase regulatory subunit 11 OS=Homo sapiens OX=9606 GN=PSMD11 PE=1 SV=3	QTEALKC(BTD[C])VAQASK|	2|	1.08|	1.08	NA	2	1
400	P18206	313	VCL	VINC_HUMAN Vinculin OS=Homo sapiens OX=9606 GN=VCL PE=1 SV=4	VGELC(BTD[C])AGK|	1|	1.08|	1.08	NA	1	1
401	P30050	141	RPL12	RL12_HUMAN 60S ribosomal protein L12 OS=Homo sapiens OX=9606 GN=RPL12 PE=1 SV=1	EILGTAQSVGC(BTD[C])NVDGR|	2|	1.08|	1.08	NA	2	1
402	P46777	76	RPL5	RL5_HUMAN 60S ribosomal protein L5 OS=Homo sapiens OX=9606 GN=RPL5 PE=1 SV=3	IEGDMIVC(BTD[C])AAYAHELPK|IEGDMIVC(BTD[C])AAYAHELPK	1|1	0.94|1.22	1.08	0.19799	2	2
403	P46776	70	RPL27A	RL27A_HUMAN 60S ribosomal protein L27a OS=Homo sapiens OX=9606 GN=RPL27A PE=1 SV=2	NQSFC(BTD[C])PTVNLDK|	1|	1.08|	1.08	NA	1	1
404	Q8NEZ5	378	FBXO22	FBX22_HUMAN F-box only protein 22 OS=Homo sapiens OX=9606 GN=FBXO22 PE=1 SV=1	KC(BTD[C])NEVK|	1|	1.08|	1.08	NA	1	1
405	Q14934	688	NFATC4	NFAC4_HUMAN Nuclear factor of activated T-cells, cytoplasmic 4 OS=Homo sapiens OX=9606 GN=NFATC4 PE=1 SV=2	FLPVIC(BTD[C])K|	4|	1.075|	1.075	NA	4	1
406	P13639	728	EEF2	EF2_HUMAN Elongation factor 2 OS=Homo sapiens OX=9606 GN=EEF2 PE=1 SV=4	RC(BTD[C])LYASVLTAQPR|RC(BTD[C])LYASVLTAQPR	1|2	1.08|1.065	1.0725	0.01061	3	2
407	P27816	654	MAP4	MAP4_HUMAN Microtubule-associated protein 4 OS=Homo sapiens OX=9606 GN=MAP4 PE=1 SV=3	KPC(BTD[C])NSQPSELSSETSGIARPEEGRPVVSGTGNDITTPPNK|KPC(BTD[C])NSQPSELSSETSGIAR	1|1	0.9|1.24	1.07	0.24042	2	2
408	Q96SQ9	440	CYP2S1	CP2S1_HUMAN Cytochrome P450 2S1 OS=Homo sapiens OX=9606 GN=CYP2S1 PE=1 SV=2	RVC(BTD[C])LGEGLAK|	1|	1.07|	1.07	NA	1	1	Metal binding
409	O43815	740	STRN	STRN_HUMAN Striatin OS=Homo sapiens OX=9606 GN=STRN PE=1 SV=4	TC(BTD[C])IQEFTAHR|	1|	1.07|	1.07	NA	1	1
410	P13639	369	EEF2	EF2_HUMAN Elongation factor 2 OS=Homo sapiens OX=9606 GN=EEF2 PE=1 SV=4	YRC(BTD[C])ELLYEGPPDDEAAMGIK|	1|	1.07|	1.07	NA	1	1
411	A0A0B4J2D5	176	GATD3B	GAL3B_HUMAN Glutamine amidotransferase-like class 1 domain-containing protein 3B, mitochondrial OS=Homo sapiens OX=9606 GN=GATD3B PE=1 SV=1	EFHQAGKPIGLC(BTD[C])CIAPVLAAK|	1|	1.07|	1.07	NA	1	1
412	O14980	99	XPO1	XPO1_HUMAN Exportin-1 OS=Homo sapiens OX=9606 GN=XPO1 PE=1 SV=1	|NQC(BTD[C])EGIKK	|1	|1.07	1.07	NA	1	1
413	O75369	2154	FLNB	FLNB_HUMAN Filamin-B OS=Homo sapiens OX=9606 GN=FLNB PE=1 SV=2	NSHC(BTD[C])VR|NSHC(BTD[C])VR	2|2	1.09|1.04	1.065	0.03536	4	2
414	P62191	58	PSMC1	PRS4_HUMAN 26S proteasome regulatory subunit 4 OS=Homo sapiens OX=9606 GN=PSMC1 PE=1 SV=1	LPLVTPHTQC(BTD[C])R|LPLVTPHTQC(BTD[C])R	2|1	1.0|1.13	1.065	0.09192	3	2
415	P14618	424	PKM	KPYM_HUMAN Pyruvate kinase PKM OS=Homo sapiens OX=9606 GN=PKM PE=1 SV=4	CC(BTD[C])SGAIIVLTK|	1|	1.06|	1.06	NA	1	1
416	P49792	2982	RANBP2	RBP2_HUMAN E3 SUMO-protein ligase RanBP2 OS=Homo sapiens OX=9606 GN=RANBP2 PE=1 SV=2	|VC(BTD[C])ANHVITK	|2	|1.06	1.06	NA	2	1
417	P07814	1377	EPRS	SYEP_HUMAN Bifunctional glutamate/proline--tRNA ligase OS=Homo sapiens OX=9606 GN=EPRS PE=1 SV=5	|SC(BTD[C])QFVAVR	|2	|1.06	1.06	NA	2	1
418	P40926	93	MDH2	MDHM_HUMAN Malate dehydrogenase, mitochondrial OS=Homo sapiens OX=9606 GN=MDH2 PE=1 SV=3	GC(BTD[C])DVVVIPAGVPR|GC(BTD[C])DVVVIPAGVPR	2|1	1.36|0.75	1.055	0.43134	3	2
419	P08670	328	VIM	VIME_HUMAN Vimentin OS=Homo sapiens OX=9606 GN=VIM PE=1 SV=4	QVQSLTC(BTD[C])EVDALK|QVQSLTC(BTD[C])EVDALK	2|3	0.945|1.16	1.0525	0.15203	5	2
420	P21333	574	FLNA	FLNA_HUMAN Filamin-A OS=Homo sapiens OX=9606 GN=FLNA PE=1 SV=4	VGTEC(BTD[C])GNQK|	1|	1.05|	1.05	NA	1	1
421	P21333	1165	FLNA	FLNA_HUMAN Filamin-A OS=Homo sapiens OX=9606 GN=FLNA PE=1 SV=4	VKC(BTD[C])SGPGLER|VKC(BTD[C])SGPGLER	1|2	1.04|1.06	1.05	0.01414	3	2
422	P62316	46	SNRPD2	SMD2_HUMAN Small nuclear ribonucleoprotein Sm D2 OS=Homo sapiens OX=9606 GN=SNRPD2 PE=1 SV=1	NNTQVLINC(BTD[C])R NTQVLINC(BTD[C])R|NNTQVLINC(BTD[C])R NTQVLINC(BTD[C])R	4|6	1.05|1.05	1.05	0	10	2
423	Q08257	45	CRYZ	QOR_HUMAN Quinone oxidoreductase OS=Homo sapiens OX=9606 GN=CRYZ PE=1 SV=1	HAC(BTD[C])GVNPVETYIR|	1|	1.05|	1.05	NA	1	1
424	Q92616	2255	GCN1	GCN1_HUMAN eIF-2-alpha kinase activator GCN1 OS=Homo sapiens OX=9606 GN=GCN1 PE=1 SV=6	GEHVPGFC(BTD[C])LPK|	1|	1.05|	1.05	NA	1	1
425	P63244	249	RACK1	RACK1_HUMAN Receptor of activated protein C kinase 1 OS=Homo sapiens OX=9606 GN=RACK1 PE=1 SV=3	YWLC(BTD[C])AATGPSIK|	2|	1.05|	1.05	NA	2	1
426	O75531	67	BANF1	BAF_HUMAN Barrier-to-autointegration factor OS=Homo sapiens OX=9606 GN=BANF1 PE=1 SV=1	DTC(BTD[C])GANAK|DTC(BTD[C])GANAK	2|2	1.25|0.84	1.045	0.28991	4	2
427	P11413	158	G6PD	G6PD_HUMAN Glucose-6-phosphate 1-dehydrogenase OS=Homo sapiens OX=9606 GN=G6PD PE=1 SV=4	NIHESC(BTD[C])MSQIGWNR|NIHESC(BTD[C])MSQIGWNR	1|1	0.85|1.24	1.045	0.27577	2	2
428	Q99832	158	CCT7	TCPH_HUMAN T-complex protein 1 subunit eta OS=Homo sapiens OX=9606 GN=CCT7 PE=1 SV=2	LLEKC(BTD[C])AMTALSSK|LLEKC(BTD[C])AMTALSSK	5|2	0.96|1.13	1.045	0.12021	7	2
429	P04406	247	GAPDH	G3P_HUMAN Glyceraldehyde-3-phosphate dehydrogenase OS=Homo sapiens OX=9606 GN=GAPDH PE=1 SV=3	VPTANVSVVDLTC(BTD[C])R|VPTANVSVVDLTC(BTD[C])R	4|2	1.05|1.04	1.045	0.00707	6	2
430	P68104	411	EEF1A1	EF1A1_HUMAN Elongation factor 1-alpha 1 OS=Homo sapiens OX=9606 GN=EEF1A1 PE=1 SV=1	SGDAAIVDMVPGKPMC(BTD[C])VESFSDYPPLGR|	5|	1.04|	1.04	NA	5	1
431	P09234	25	SNRPC	RU1C_HUMAN U1 small nuclear ribonucleoprotein C OS=Homo sapiens OX=9606 GN=SNRPC PE=1 SV=1	THC(BTD[C])SGR|THC(BTD[C])SGR	1|2	0.9|1.18	1.04	0.19799	3	2
432	P52209	289	PGD	6PGD_HUMAN 6-phosphogluconate dehydrogenase, decarboxylating OS=Homo sapiens OX=9606 GN=PGD PE=1 SV=3	|C(BTD[C])LSSLKDER	|1	|1.04	1.04	NA	1	1
433	Q00610	870	CLTC	CLH1_HUMAN Clathrin heavy chain 1 OS=Homo sapiens OX=9606 GN=CLTC PE=1 SV=5	IHEGC(BTD[C])EEPATHNALAK|IHEGC(BTD[C])EEPATHNALAK	4|2	1.02|1.055	1.0375	0.02475	6	2
434	Q01780	852	EXOSC10	EXOSX_HUMAN Exosome component 10 OS=Homo sapiens OX=9606 GN=EXOSC10 PE=1 SV=2	KC(BTD[C])IAAK|KC(BTD[C])IAAK	2|1	1.03|1.04	1.035	0.00707	3	2
435	Q96FV9	49	THOC1	THOC1_HUMAN THO complex subunit 1 OS=Homo sapiens OX=9606 GN=THOC1 PE=1 SV=1	KC(BTD[C])TLDQAFR|KC(BTD[C])TLDQAFR	2|2	0.875|1.19	1.0325	0.22274	4	2
436	O43684	129	BUB3	BUB3_HUMAN Mitotic checkpoint protein BUB3 OS=Homo sapiens OX=9606 GN=BUB3 PE=1 SV=1	TPC(BTD[C])NAGTFSQPEK|	2|	1.03|	1.03	NA	2	1
437	P05556	691	ITGB1	ITB1_HUMAN Integrin beta-1 OS=Homo sapiens OX=9606 GN=ITGB1 PE=1 SV=2	|DKLPQPVQPDPVSHC(BTD[C])K	|1	|1.03	1.03	NA	1	1	Disulfide bond
438	Q9ULV4	330	CORO1C	COR1C_HUMAN Coronin-1C OS=Homo sapiens OX=9606 GN=CORO1C PE=1 SV=1	GLDVNKC(BTD[C])EIAR|GLDVNKC(BTD[C])EIAR	1|4	0.91|1.14	1.025	0.16263	5	2
439	P21333	2601	FLNA	FLNA_HUMAN Filamin-A OS=Homo sapiens OX=9606 GN=FLNA PE=1 SV=4	TPC(BTD[C])EEILVK|TPC(BTD[C])EEILVK	1|2	1.01|1.04	1.025	0.02121	3	2
440	P21333	2543	FLNA	FLNA_HUMAN Filamin-A OS=Homo sapiens OX=9606 GN=FLNA PE=1 SV=4	ATC(BTD[C])APQHGAPGPGPADASK|ATC(BTD[C])APQHGAPGPGPADASK	3|4	1.09|0.95	1.02	0.09899	7	2
441	P62857	27	RPS28	RS28_HUMAN 40S ribosomal protein S28 OS=Homo sapiens OX=9606 GN=RPS28 PE=1 SV=1	GSQGQC(BTD[C])TQVR SQGQC(BTD[C])TQVR|GSQGQC(BTD[C])TQVR TGSQGQC(BTD[C])TQVR SQGQC(BTD[C])TQVR	4|8	1.065|0.975	1.02	0.06364	12	2
442	P26368	464	U2AF2	U2AF2_HUMAN Splicing factor U2AF 65 kDa subunit OS=Homo sapiens OX=9606 GN=U2AF2 PE=1 SV=4	YC(BTD[C])DPDSYHR|	3|	1.02|	1.02	NA	3	1
443	P18206	545	VCL	VINC_HUMAN Vinculin OS=Homo sapiens OX=9606 GN=VCL PE=1 SV=4	QDLLAKC(BTD[C])DR|QDLLAKC(BTD[C])DR	5|3	1.0|1.04	1.02	0.02828	8	2
444	A0A0B4J2D5	153	GATD3B	GAL3B_HUMAN Glutamine amidotransferase-like class 1 domain-containing protein 3B, mitochondrial OS=Homo sapiens OX=9606 GN=GATD3B PE=1 SV=1	NLSTFAVDGKDC(BTD[C])K|	1|	1.02|	1.02	NA	1	1
445	Q9ULV4	420	CORO1C	COR1C_HUMAN Coronin-1C OS=Homo sapiens OX=9606 GN=CORO1C PE=1 SV=1	KC(BTD[C])DLISIPK|KC(BTD[C])DLISIPK	2|2	1.01|1.03	1.02	0.01414	4	2
446	P30405	104	PPIF	PPIF_HUMAN Peptidyl-prolyl cis-trans isomerase F, mitochondrial OS=Homo sapiens OX=9606 GN=PPIF PE=1 SV=1	|VIPSFMC(BTD[C])QAGDFTNHNGTGGK	|1	|1.02	1.02	NA	1	1
447	P40926	89	MDH2	MDHM_HUMAN Malate dehydrogenase, mitochondrial OS=Homo sapiens OX=9606 GN=MDH2 PE=1 SV=3	|GYLGPEQLPDC(BTD[C])LK	|1	|1.02	1.02	NA	1	1
448	Q00765	18	REEP5	REEP5_HUMAN Receptor expression-enhancing protein 5 OS=Homo sapiens OX=9606 GN=REEP5 PE=1 SV=3	|NC(BTD[C])MTDLLAK	|2	|1.02	1.02	NA	2	1
449	Q93008	1724	USP9X	USP9X_HUMAN Probable ubiquitin carboxyl-terminal hydrolase FAF-X OS=Homo sapiens OX=9606 GN=USP9X PE=1 SV=3	IC(BTD[C])QGCPHR|	2|	1.015|	1.015	NA	2	1
450	P55060	842	CSE1L	XPO2_HUMAN Exportin-2 OS=Homo sapiens OX=9606 GN=CSE1L PE=1 SV=3	KIC(BTD[C])AVGITK|KIC(BTD[C])AVGITK	2|2	1.03|1.0	1.015	0.02121	4	2
451	P49321	708	NASP	NASP_HUMAN Nuclear autoantigenic sperm protein OS=Homo sapiens OX=9606 GN=NASP PE=1 SV=2	KPTDGASSSNC(BTD[C])VTDISHLVR|KPTDGASSSNC(BTD[C])VTDISHLVR	1|3	1.0|1.03	1.015	0.02121	4	2
452	P09211	102	GSTP1	GSTP1_HUMAN Glutathione S-transferase P OS=Homo sapiens OX=9606 GN=GSTP1 PE=1 SV=2	DQQEAALVDMVNDGVEDLRC(BTD[C])K|DQQEAALVDMVNDGVEDLRC(BTD[C])K	1|1	1.12|0.91	1.015	0.14849	2	2
453	P62140	126	PPP1CB	PP1B_HUMAN Serine/threonine-protein phosphatase PP1-beta catalytic subunit OS=Homo sapiens OX=9606 GN=PPP1CB PE=1 SV=3	GNHEC(BTD[C])ASINR|GNHEC(BTD[C])ASINR	3|2	1.01|1.01	1.01	0	5	2
454	O95361	178	TRIM16	TRI16_HUMAN Tripartite motif-containing protein 16 OS=Homo sapiens OX=9606 GN=TRIM16 PE=1 SV=3	DKEAELQC(BTD[C])TQLDLER|	1|	1.01|	1.01	NA	1	1
455	Q2VIR3	269	EIF2S3B	IF2GL_HUMAN Eukaryotic translation initiation factor 2 subunit 3B OS=Homo sapiens OX=9606 GN=EIF2S3B PE=2 SV=2	SFDVNKPGC(BTD[C])EVDDLKGGVAGGSILK|	1|	1.01|	1.01	NA	1	1
456	Q99497	53	PARK7	PARK7_HUMAN Protein/nucleic acid deglycase DJ-1 OS=Homo sapiens OX=9606 GN=PARK7 PE=1 SV=2	DVVIC(BTD[C])PDASLEDAKK|DVVIC(BTD[C])PDASLEDAKK	1|1	0.96|1.06	1.01	0.07071	2	2
457	Q16881	214	TXNRD1	TRXR1_HUMAN Thioredoxin reductase 1, cytoplasmic OS=Homo sapiens OX=9606 GN=TXNRD1 PE=1 SV=3	WGLGGTCVNVGC(BTD[C])IPK|	1|	1.01|	1.01	NA	1	1	Disulfide bond
458	Q96I25	302	RBM17	SPF45_HUMAN Splicing factor 45 OS=Homo sapiens OX=9606 GN=RBM17 PE=1 SV=1	|SDSNPLTEILKC(BTD[C])PTK	|1	|1.01	1.01	NA	1	1
459	P60981	23	DSTN	DEST_HUMAN Destrin OS=Homo sapiens OX=9606 GN=DSTN PE=1 SV=3	KC(BTD[C])STPEEIKK KC(BTD[C])STPEEIK|KC(BTD[C])STPEEIKK KC(BTD[C])STPEEIK	7|5	1.02|0.99	1.005	0.02121	12	2
460	P35579	931	MYH9	MYH9_HUMAN Myosin-9 OS=Homo sapiens OX=9606 GN=MYH9 PE=1 SV=4	VEEEEERC(BTD[C])QHLQAEK|VEEEEERC(BTD[C])QHLQAEK	2|2	0.96|1.05	1.005	0.06364	4	2
461	P32969	74	RPL9	RL9_HUMAN 60S ribosomal protein L9 OS=Homo sapiens OX=9606 GN=RPL9 PE=1 SV=1	TIC(BTD[C])SHVQNMIK|TIC(BTD[C])SHVQNMIK	1|1	0.75|1.26	1.005	0.36062	2	2
462	Q9UJX3	131	ANAPC7	APC7_HUMAN Anaphase-promoting complex subunit 7 OS=Homo sapiens OX=9606 GN=ANAPC7 PE=1 SV=4	VRPSTGNSASTPQSQC(BTD[C])LPSEIEVK|VRPSTGNSASTPQSQC(BTD[C])LPSEIEVK	1|1	1.12|0.89	1.005	0.16263	2	2
463	P63244	168	RACK1	RACK1_HUMAN Receptor of activated protein C kinase 1 OS=Homo sapiens OX=9606 GN=RACK1 PE=1 SV=3	FSPNSSNPIIVSC(BTD[C])GWDK|FSPNSSNPIIVSC(BTD[C])GWDK	4|1	1.06|0.95	1.005	0.07778	5	2
464	P07437	12	TUBB	TBB5_HUMAN Tubulin beta chain OS=Homo sapiens OX=9606 GN=TUBB PE=1 SV=2	HIQAGQC(BTD[C])GNQIGAK AGQC(BTD[C])GNQIGAK VHIQAGQC(BTD[C])GNQIGAK IVHIQAGQC(BTD[C])GNQIGAK EIVHIQAGQC(BTD[C])GNQIGAK|	19|	1.0|	1	NA	19	1
465	O95373	736	IPO7	IPO7_HUMAN Importin-7 OS=Homo sapiens OX=9606 GN=IPO7 PE=1 SV=1	VLTGVAGEDAEC(BTD[C])HAAK|	1|	1.0|	1	NA	1	1
466	O43684	270	BUB3	BUB3_HUMAN Mitotic checkpoint protein BUB3 OS=Homo sapiens OX=9606 GN=BUB3 PE=1 SV=1	LC(BTD[C])QFHR|	3|	1.0|	1	NA	3	1
467	P49327	1127	FASN	FAS_HUMAN Fatty acid synthase OS=Homo sapiens OX=9606 GN=FASN PE=1 SV=3	FCFTPHTEEGC(BTD[C])LSER|	1|	1.0|	1	NA	1	1
468	P00390	107	GSR	GSHR_HUMAN Glutathione reductase, mitochondrial OS=Homo sapiens OX=9606 GN=GSR PE=1 SV=2	LGGTCVNVGC(BTD[C])VPK|LGGTCVNVGC(BTD[C])VPK	4|1	1.0|1.0	1	0	5	2	Disulfide bond
469	P12268	140	IMPDH2	IMDH2_HUMAN Inosine-5'-monophosphate dehydrogenase 2 OS=Homo sapiens OX=9606 GN=IMPDH2 PE=1 SV=2	HGFC(BTD[C])GIPITDTGR|	1|	1.0|	1	NA	1	1
470	O75369	1915	FLNB	FLNB_HUMAN Filamin-B OS=Homo sapiens OX=9606 GN=FLNB PE=1 SV=2	RC(BTD[C])SQVK|	1|	1.0|	1	NA	1	1
471	Q12765	290	SCRN1	SCRN1_HUMAN Secernin-1 OS=Homo sapiens OX=9606 GN=SCRN1 PE=1 SV=2	|SSPC(BTD[C])IHYFTGTPDPSR	|1	|1.0	1	NA	1	1
472	Q14980	160	NUMA1	NUMA1_HUMAN Nuclear mitotic apparatus protein 1 OS=Homo sapiens OX=9606 GN=NUMA1 PE=1 SV=2	|APVPSTC(BTD[C])SSTFPEELSPPSHQAK	|1	|1.0	1	NA	1	1
473	P11216	373	PYGB	PYGB_HUMAN Glycogen phosphorylase, brain form OS=Homo sapiens OX=9606 GN=PYGB PE=1 SV=5	|TC(BTD[C])AYTNHTVLPEALER	|1	|1.0	1	NA	1	1
474	P54652	191	HSPA2	HSP72_HUMAN Heat shock-related 70 kDa protein 2 OS=Homo sapiens OX=9606 GN=HSPA2 PE=1 SV=1	GC(BTD[C])AGGEK KGC(BTD[C])AGGEK|KGC(BTD[C])AGGEK	2|2	1.02|0.96	0.99	0.04243	4	2
475	Q13867	164	BLMH	BLMH_HUMAN Bleomycin hydrolase OS=Homo sapiens OX=9606 GN=BLMH PE=1 SV=1	KC(BTD[C])FPESYTTEATR|KC(BTD[C])FPESYTTEATR	1|3	0.79|1.19	0.99	0.28284	4	2
476	P63167	56	DYNLL1	DYL1_HUMAN Dynein light chain 1, cytoplasmic OS=Homo sapiens OX=9606 GN=DYNLL1 PE=1 SV=1	NPTWHC(BTD[C])IVGR PTWHC(BTD[C])IVGR YNPTWHC(BTD[C])IVGR|NPTWHC(BTD[C])IVGR YNPTWHC(BTD[C])IVGR	6|5	0.99|0.99	0.99	0	11	2
477	P40939	747	HADHA	ECHA_HUMAN Trifunctional enzyme subunit alpha, mitochondrial OS=Homo sapiens OX=9606 GN=HADHA PE=1 SV=2	QFTPC(BTD[C])QLLADHANSPNKK|QFTPC(BTD[C])QLLADHANSPNKK QFTPC(BTD[C])QLLADHANSPNK	1|3	1.01|0.96	0.985	0.03536	4	2
478	P45974	838	USP5	UBP5_HUMAN Ubiquitin carboxyl-terminal hydrolase 5 OS=Homo sapiens OX=9606 GN=USP5 PE=1 SV=2	VC(BTD[C])ASEKPPK|	2|	0.98|	0.98	NA	2	1
479	Q14344	37	GNA13	GNA13_HUMAN Guanine nucleotide-binding protein subunit alpha-13 OS=Homo sapiens OX=9606 GN=GNA13 PE=1 SV=2	IDKC(BTD[C])LSR|	2|	0.98|	0.98	NA	2	1
480	Q01813	718	PFKP	PFKAP_HUMAN ATP-dependent 6-phosphofructokinase, platelet type OS=Homo sapiens OX=9606 GN=PFKP PE=1 SV=2	FTTDDSIC(BTD[C])VLGISK|FTTDDSIC(BTD[C])VLGISK	2|2	0.97|0.99	0.98	0.01414	4	2
481	Q9GZT9	127	EGLN1	EGLN1_HUMAN Egl nine homolog 1 OS=Homo sapiens OX=9606 GN=EGLN1 PE=1 SV=1	|AKPPADPAAAASPC(BTD[C])R	|3	|0.98	0.98	NA	3	1
482	P07737	71	PFN1	PROF1_HUMAN Profilin-1 OS=Homo sapiens OX=9606 GN=PFN1 PE=1 SV=2	|YVNGLTLGGQKC(BTD[C])SVIR	|2	|0.98	0.98	NA	2	1
483	P61247	201	RPS3A	RS3A_HUMAN 40S ribosomal protein S3a OS=Homo sapiens OX=9606 GN=RPS3A PE=1 SV=2	|AC(BTD[C])QSIYPLHDVFVR	|2	|0.98	0.98	NA	2	1
484	Q8N3C0	2101	ASCC3	ASCC3_HUMAN Activating signal cointegrator 1 complex subunit 3 OS=Homo sapiens OX=9606 GN=ASCC3 PE=1 SV=3	GKPESC(BTD[C])AVTPR|	1|	0.97|	0.97	NA	1	1
485	P49792	2577	RANBP2	RBP2_HUMAN E3 SUMO-protein ligase RanBP2 OS=Homo sapiens OX=9606 GN=RANBP2 PE=1 SV=2	KC(BTD[C])ELSK|	1|	0.97|	0.97	NA	1	1
486	Q16719	45	KYNU	KYNU_HUMAN Kynureninase OS=Homo sapiens OX=9606 GN=KYNU PE=1 SV=1	REC(BTD[C])FYIPK|	1|	0.97|	0.97	NA	1	1
487	P00505	187	GOT2	AATM_HUMAN Aspartate aminotransferase, mitochondrial OS=Homo sapiens OX=9606 GN=GOT2 PE=1 SV=3	TC(BTD[C])GFDFTGAVEDISK|	1|	0.97|	0.97	NA	1	1
488	P62140	21	PPP1CB	PP1B_HUMAN Serine/threonine-protein phosphatase PP1-beta catalytic subunit OS=Homo sapiens OX=9606 GN=PPP1CB PE=1 SV=3	GC(BTD[C])RPGK|	1|	0.97|	0.97	NA	1	1
489	P30519	265	HMOX2	HMOX2_HUMAN Heme oxygenase 2 OS=Homo sapiens OX=9606 GN=HMOX2 PE=1 SV=2	KC(BTD[C])PFYAAEQDK|KC(BTD[C])PFYAAEQDK	2|4	0.93|1.005	0.9675	0.05303	6	2
490	Q14980	80	NUMA1	NUMA1_HUMAN Nuclear mitotic apparatus protein 1 OS=Homo sapiens OX=9606 GN=NUMA1 PE=1 SV=2	HPSSPEC(BTD[C])LVSAQK|HPSSPEC(BTD[C])LVSAQK	1|1	1.02|0.91	0.965	0.07778	2	2
491	Q13813	1622	SPTAN1	SPTN1_HUMAN Spectrin alpha chain, non-erythrocytic 1 OS=Homo sapiens OX=9606 GN=SPTAN1 PE=1 SV=3	GAC(BTD[C])AGSEDAVK|	1|	0.96|	0.96	NA	1	1
492	P38646	608	HSPA9	GRP75_HUMAN Stress-70 protein, mitochondrial OS=Homo sapiens OX=9606 GN=HSPA9 PE=1 SV=2	MEEFKDQLPADEC(BTD[C])NKLK|DQLPADEC(BTD[C])NKLK MEEFKDQLPADEC(BTD[C])NKLK	4|3	0.92|1.0	0.96	0.05657	7	2
493	P22626	50	HNRNPA2B1	ROA2_HUMAN Heterogeneous nuclear ribonucleoproteins A2/B1 OS=Homo sapiens OX=9606 GN=HNRNPA2B1 PE=1 SV=2	LTDC(BTD[C])VVMRDPASK|	2|	0.96|	0.96	NA	2	1
494	P51858	12	HDGF	HDGF_HUMAN Hepatoma-derived growth factor OS=Homo sapiens OX=9606 GN=HDGF PE=1 SV=1	EYKC(BTD[C])GDLVFAK|	1|	0.96|	0.96	NA	1	1	Disulfide bond
495	P61247	96	RPS3A	RS3A_HUMAN 40S ribosomal protein S3a OS=Homo sapiens OX=9606 GN=RPS3A PE=1 SV=2	NC(BTD[C])LTNFHGMDLTR|NC(BTD[C])LTNFHGMDLTR	3|3	0.99|0.93	0.96	0.04243	6	2
496	P61106	26	RAB14	RAB14_HUMAN Ras-related protein Rab-14 OS=Homo sapiens OX=9606 GN=RAB14 PE=1 SV=4	SC(BTD[C])LLHQFTEK|	3|	0.96|	0.96	NA	3	1
497	P15121	299	AKR1B1	ALDR_HUMAN Aldo-keto reductase family 1 member B1 OS=Homo sapiens OX=9606 GN=AKR1B1 PE=1 SV=3	|VC(BTD[C])ALLSCTSHK	|2	|0.96	0.96	NA	2	1
498	P18206	325	VCL	VINC_HUMAN Vinculin OS=Homo sapiens OX=9606 GN=VCL PE=1 SV=4	REILGTC(BTD[C])K|REILGTC(BTD[C])K	2|1	0.96|0.95	0.955	0.00707	3	2
499	P62851	59	RPS25	RS25_HUMAN 40S ribosomal protein S25 OS=Homo sapiens OX=9606 GN=RPS25 PE=1 SV=1	ATYDKLC(BTD[C])K|TYDKLC(BTD[C])K	2|1	0.8|1.11	0.955	0.2192	3	2
500	P24752	126	ACAT1	THIL_HUMAN Acetyl-CoA acetyltransferase, mitochondrial OS=Homo sapiens OX=9606 GN=ACAT1 PE=1 SV=1	VC(BTD[C])ASGMK|VC(BTD[C])ASGMK	2|1	0.99|0.91	0.95	0.05657	3	2	Active site
501	P46734	29	MAP2K3	MP2K3_HUMAN Dual specificity mitogen-activated protein kinase kinase 3 OS=Homo sapiens OX=9606 GN=MAP2K3 PE=1 SV=2	ISC(BTD[C])MSKPPAPNPTPPR|	1|	0.95|	0.95	NA	1	1
502	Q96EP5	85	DAZAP1	DAZP1_HUMAN DAZ-associated protein 1 OS=Homo sapiens OX=9606 GN=DAZAP1 PE=1 SV=1	NIDPKPC(BTD[C])TPR|	1|	0.95|	0.95	NA	1	1
503	Q9ULV4	456	CORO1C	COR1C_HUMAN Coronin-1C OS=Homo sapiens OX=9606 GN=CORO1C PE=1 SV=1	SIKDTIC(BTD[C])NQDER|SIKDTIC(BTD[C])NQDER	1|3	0.96|0.94	0.95	0.01414	4	2
504	P50993	660	ATP1A2	AT1A2_HUMAN Sodium/potassium-transporting ATPase subunit alpha-2 OS=Homo sapiens OX=9606 GN=ATP1A2 PE=1 SV=1	AC(BTD[C])VVHGSDLK|	2|	0.95|	0.95	NA	2	1
505	P05198	6	EIF2S1	IF2A_HUMAN Eukaryotic translation initiation factor 2 subunit 1 OS=Homo sapiens OX=9606 GN=EIF2S1 PE=1 SV=3	PGLSC(BTD[C])R|	1|	0.95|	0.95	NA	1	1
506	Q96Q11	373	TRNT1	TRNT1_HUMAN CCA tRNA nucleotidyltransferase 1, mitochondrial OS=Homo sapiens OX=9606 GN=TRNT1 PE=1 SV=2	YQGEHC(BTD[C])LLK|YQGEHC(BTD[C])LLK	2|1	0.91|0.99	0.95	0.05657	3	2	Disulfide bond
507	P21333	2378	FLNA	FLNA_HUMAN Filamin-A OS=Homo sapiens OX=9606 GN=FLNA PE=1 SV=4	VHSPSGALEEC(BTD[C])YVTEIDQDK|	1|	0.95|	0.95	NA	1	1
508	O75369	991	FLNB	FLNB_HUMAN Filamin-B OS=Homo sapiens OX=9606 GN=FLNB PE=1 SV=2	VVPC(BTD[C])LVTPVTGR|VVPC(BTD[C])LVTPVTGR	2|2	1.05|0.85	0.95	0.14142	4	2
509	P09622	85	DLD	DLDH_HUMAN Dihydrolipoyl dehydrogenase, mitochondrial OS=Homo sapiens OX=9606 GN=DLD PE=1 SV=2	|NETLGGTCLNVGC(BTD[C])IPSK	|2	|0.95	0.95	NA	2	1	Disulfide bond
510	P60866	70	RPS20	RS20_HUMAN 40S ribosomal protein S20 OS=Homo sapiens OX=9606 GN=RPS20 PE=1 SV=1	KTPC(BTD[C])GEGSK TPC(BTD[C])GEGSK|KTPC(BTD[C])GEGSK TPC(BTD[C])GEGSK	5|9	0.93|0.96	0.945	0.02121	14	2
511	Q9Y4Z0	59	LSM4	LSM4_HUMAN U6 snRNA-associated Sm-like protein LSm4 OS=Homo sapiens OX=9606 GN=LSM4 PE=1 SV=1	MPEC(BTD[C])YIR|MPEC(BTD[C])YIR	3|2	0.92|0.97	0.945	0.03536	5	2
512	P48637	294	GSS	GSHB_HUMAN Glutathione synthetase OS=Homo sapiens OX=9606 GN=GSS PE=1 SV=1	|SHAAKC(BTD[C])PDIATQLAGTK	|2	|0.945	0.945	NA	2	1
513	P31939	434	ATIC	PUR9_HUMAN Bifunctional purine biosynthesis protein PURH OS=Homo sapiens OX=9606 GN=ATIC PE=1 SV=3	YTQSNSVC(BTD[C])YAK|	1|	0.94|	0.94	NA	1	1
514	Q99497	46	PARK7	PARK7_HUMAN Protein/nucleic acid deglycase DJ-1 OS=Homo sapiens OX=9606 GN=PARK7 PE=1 SV=2	TVAGLAGKDPVQC(BTD[C])SR VTVAGLAGKDPVQC(BTD[C])SR|DPVQC(BTD[C])SR VTVAGLAGKDPVQC(BTD[C])SR	3|3	0.89|0.99	0.94	0.07071	6	2
515	P10606	113	COX5B	COX5B_HUMAN Cytochrome c oxidase subunit 5B, mitochondrial OS=Homo sapiens OX=9606 GN=COX5B PE=1 SV=2	GEAQRC(BTD[C])PR|	1|	0.94|	0.94	NA	1	1	Metal binding
516	P27797	105	CALR	CALR_HUMAN Calreticulin OS=Homo sapiens OX=9606 GN=CALR PE=1 SV=1	|HEQNIDC(BTD[C])GGGYVK	|2	|0.94	0.94	NA	2	1	Disulfide bond
517	P60981	147	DSTN	DEST_HUMAN Destrin OS=Homo sapiens OX=9606 GN=DSTN PE=1 SV=3	|AC(BTD[C])IAEK	|1	|0.94	0.94	NA	1	1
518	O75369	416	FLNB	FLNB_HUMAN Filamin-B OS=Homo sapiens OX=9606 GN=FLNB PE=1 SV=2	C(BTD[C])VYKPMQPGPHVVK|	2|	0.935|	0.935	NA	2	1
519	Q06830	173	PRDX1	PRDX1_HUMAN Peroxiredoxin-1 OS=Homo sapiens OX=9606 GN=PRDX1 PE=1 SV=1	HGEVC(BTD[C])PAGWKPGSDTIKPDVQK|HGEVC(BTD[C])PAGWKPGSDTIKPDVQK	2|2	0.92|0.95	0.935	0.02121	4	2	Disulfide bond
520	O75116	804	ROCK2	ROCK2_HUMAN Rho-associated protein kinase 2 OS=Homo sapiens OX=9606 GN=ROCK2 PE=1 SV=4	RC(BTD[C])LTQNDLK|RC(BTD[C])LTQNDLK	1|2	0.9|0.97	0.935	0.0495	3	2
521	Q16643	96	DBN1	DREB_HUMAN Drebrin OS=Homo sapiens OX=9606 GN=DBN1 PE=1 SV=4	|KC(BTD[C])ACASHVAK	|4	|0.935	0.935	NA	4	1
522	P63220	17	RPS21	RS21_HUMAN 40S ribosomal protein S21 OS=Homo sapiens OX=9606 GN=RPS21 PE=1 SV=1	C(BTD[C])SASNR KC(BTD[C])SASNR|	7|	0.93|	0.93	NA	7	1
523	Q9ULA0	327	DNPEP	DNPEP_HUMAN Aspartyl aminopeptidase OS=Homo sapiens OX=9606 GN=DNPEP PE=1 SV=1	ISASC(BTD[C])QHPTAFEEAIPK|	1|	0.93|	0.93	NA	1	1
524	Q9BZG1	38	RAB34	RAB34_HUMAN Ras-related protein Rab-34 OS=Homo sapiens OX=9606 GN=RAB34 PE=1 SV=1	TC(BTD[C])ACQEHR|	5|	0.93|	0.93	NA	5	1
525	Q14247	112	CTTN	SRC8_HUMAN Src substrate cortactin OS=Homo sapiens OX=9606 GN=CTTN PE=1 SV=2	|HC(BTD[C])SQVDSVR	|1	|0.93	0.93	NA	1	1
526	P61006	23	RAB8A	RAB8A_HUMAN Ras-related protein Rab-8A OS=Homo sapiens OX=9606 GN=RAB8A PE=1 SV=1	|TC(BTD[C])VLFR	|1	|0.93	0.93	NA	1	1
527	Q9Y4I1	1008	MYO5A	MYO5A_HUMAN Unconventional myosin-Va OS=Homo sapiens OX=9606 GN=MYO5A PE=1 SV=2	KC(BTD[C])IEEHADR|KC(BTD[C])IEEHADR	1|1	0.8|1.05	0.925	0.17678	2	2
528	Q06323	106	PSME1	PSME1_HUMAN Proteasome activator complex subunit 1 OS=Homo sapiens OX=9606 GN=PSME1 PE=1 SV=1	KGEDEDKGPPCGPVNC(BTD[C])NEK|KGEDEDKGPPCGPVNC(BTD[C])NEK	1|2	0.98|0.87	0.925	0.07778	3	2
529	P51858	108	HDGF	HDGF_HUMAN Hepatoma-derived growth factor OS=Homo sapiens OX=9606 GN=HDGF PE=1 SV=1	KSC(BTD[C])VEEPEPEPEAAEGDGDKK|KSC(BTD[C])VEEPEPEPEAAEGDGDKK	2|3	0.88|0.97	0.925	0.06364	5	2	Disulfide bond
530	P09936	152	UCHL1	UCHL1_HUMAN Ubiquitin carboxyl-terminal hydrolase isozyme L1 OS=Homo sapiens OX=9606 GN=UCHL1 PE=1 SV=2	NEAIQAAHDAVAQEGQC(BTD[C])R|NEAIQAAHDAVAQEGQC(BTD[C])R	5|1	0.93|0.92	0.925	0.00707	6	2
531	P62244	30	RPS15A	RS15A_HUMAN 40S ribosomal protein S15a OS=Homo sapiens OX=9606 GN=RPS15A PE=1 SV=2	VLIRPC(BTD[C])SK QVLIRPC(BTD[C])SK|LIRPC(BTD[C])SK	3|1	1.0|0.85	0.925	0.10607	4	2
532	Q96P48	638	ARAP1	ARAP1_HUMAN Arf-GAP with Rho-GAP domain, ANK repeat and PH domain-containing protein 1 OS=Homo sapiens OX=9606 GN=ARAP1 PE=1 SV=3	RC(BTD[C])HLEAK|	1|	0.92|	0.92	NA	1	1
533	Q9UMY4	67	SNX12	SNX12_HUMAN Sorting nexin-12 OS=Homo sapiens OX=9606 GN=SNX12 PE=1 SV=3	LKESC(BTD[C])VR|	1|	0.92|	0.92	NA	1	1
534	P17812	491	CTPS1	PYRG1_HUMAN CTP synthase 1 OS=Homo sapiens OX=9606 GN=CTPS1 PE=1 SV=2	KC(BTD[C])LEEQGLK|KC(BTD[C])LEEQGLK	5|2	0.95|0.89	0.92	0.04243	7	2
535	P60903	62	S100A10	S10AA_HUMAN Protein S100-A10 OS=Homo sapiens OX=9606 GN=S100A10 PE=1 SV=2	|DLDQC(BTD[C])R	|1	|0.92	0.92	NA	1	1
536	P21980	554	TGM2	TGM2_HUMAN Protein-glutamine gamma-glutamyltransferase 2 OS=Homo sapiens OX=9606 GN=TGM2 PE=1 SV=2	|YRDC(BTD[C])LTESNLIK	|1	|0.92	0.92	NA	1	1
537	P23528	139	CFL1	COF1_HUMAN Cofilin-1 OS=Homo sapiens OX=9606 GN=CFL1 PE=1 SV=3	HELQANC(BTD[C])YEEVKDR HELQANC(BTD[C])YEEVK|HELQANC(BTD[C])YEEVKDR HELQANC(BTD[C])YEEVK	8|3	0.885|0.95	0.9175	0.04596	11	2
538	Q9NZM1	1392	MYOF	MYOF_HUMAN Myoferlin OS=Homo sapiens OX=9606 GN=MYOF PE=1 SV=1	|KPVVGQC(BTD[C])TIER	|4	|0.915	0.915	NA	4	1
539	Q05639	326	EEF1A2	EF1A2_HUMAN Elongation factor 1-alpha 2 OS=Homo sapiens OX=9606 GN=EEF1A2 PE=1 SV=1	RGNVC(BTD[C])GDSK|	1|	0.91|	0.91	NA	1	1
540	P49588	773	AARS	SYAC_HUMAN Alanine--tRNA ligase, cytoplasmic OS=Homo sapiens OX=9606 GN=AARS PE=1 SV=2	KC(BTD[C])LSVMEAK|KC(BTD[C])LSVMEAK	3|8	0.8|1.02	0.91	0.15556	11	2
541	Q96EI5	34	TCEAL4	TCAL4_HUMAN Transcription elongation factor A protein-like 4 OS=Homo sapiens OX=9606 GN=TCEAL4 PE=1 SV=2	KPEVTC(BTD[C])TLEDK|	2|	0.91|	0.91	NA	2	1
542	P62820	126	RAB1A	RAB1A_HUMAN Ras-related protein Rab-1A OS=Homo sapiens OX=9606 GN=RAB1A PE=1 SV=3	LLVGNKC(BTD[C])DLTTK|LLVGNKC(BTD[C])DLTTK	1|1	0.85|0.97	0.91	0.08485	2	2
543	Q16719	425	KYNU	KYNU_HUMAN Kynureninase OS=Homo sapiens OX=9606 GN=KYNU PE=1 SV=1	GVVC(BTD[C])DKR|	2|	0.905|	0.905	NA	2	1
544	Q9H9J2	53	MRPL44	RM44_HUMAN 39S ribosomal protein L44, mitochondrial OS=Homo sapiens OX=9606 GN=MRPL44 PE=1 SV=1	LRC(BTD[C])PPPPVR|LRC(BTD[C])PPPPVR	1|1	0.85|0.96	0.905	0.07778	2	2
545	O00116	413	AGPS	ADAS_HUMAN Alkyldihydroxyacetonephosphate synthase, peroxisomal OS=Homo sapiens OX=9606 GN=AGPS PE=1 SV=1	QRC(BTD[C])APASIR|	1|	0.9|	0.9	NA	1	1
546	Q86WR0	150	CCDC25	CCD25_HUMAN Coiled-coil domain-containing protein 25 OS=Homo sapiens OX=9606 GN=CCDC25 PE=1 SV=2	FPDLAAEKEC(BTD[C])R|FPDLAAEKEC(BTD[C])R	2|3	0.77|1.03	0.9	0.18385	5	2
547	P21333	1018	FLNA	FLNA_HUMAN Filamin-A OS=Homo sapiens OX=9606 GN=FLNA PE=1 SV=4	IVGPSGAAVPC(BTD[C])KVEPGLGADNSVVR|	2|	0.9|	0.9	NA	2	1
548	Q15424	362	SAFB	SAFB1_HUMAN Scaffold attachment factor B1 OS=Homo sapiens OX=9606 GN=SAFB PE=1 SV=4	|KFDFDAC(BTD[C])NEVPPAPK	|1	|0.9	0.9	NA	1	1
549	P35579	988	MYH9	MYH9_HUMAN Myosin-9 OS=Homo sapiens OX=9606 GN=MYH9 PE=1 SV=4	KLEEEQIILEDQNC(BTD[C])K|KLEEEQIILEDQNC(BTD[C])K LEEEQIILEDQNC(BTD[C])K	4|4	0.915|0.88	0.8975	0.02475	8	2
550	Q9NZM1	435	MYOF	MYOF_HUMAN Myoferlin OS=Homo sapiens OX=9606 GN=MYOF PE=1 SV=1	FPSVC(BTD[C])EK|FPSVC(BTD[C])EK	2|3	0.93|0.85	0.89	0.05657	5	2
551	P10620	50	MGST1	MGST1_HUMAN Microsomal glutathione S-transferase 1 OS=Homo sapiens OX=9606 GN=MGST1 PE=1 SV=1	KVFANPEDC(BTD[C])VAFGK FANPEDC(BTD[C])VAFGK|	3|	0.89|	0.89	NA	3	1
552	P62937	161	PPIA	PPIA_HUMAN Peptidyl-prolyl cis-trans isomerase A OS=Homo sapiens OX=9606 GN=PPIA PE=1 SV=2	KITIADC(BTD[C])GQLE|KITIADC(BTD[C])GQLE	2|3	0.89|0.89	0.89	0	5	2
553	O75223	42	GGCT	GGCT_HUMAN Gamma-glutamylcyclotransferase OS=Homo sapiens OX=9606 GN=GGCT PE=1 SV=1	NPSAAFFC(BTD[C])VAR|	1|	0.89|	0.89	NA	1	1
554	Q9NQC3	1101	RTN4	RTN4_HUMAN Reticulon-4 OS=Homo sapiens OX=9606 GN=RTN4 PE=1 SV=2	|YSNSALGHVNC(BTD[C])TIK	|5	|0.89	0.89	NA	5	1
555	P16615	997	ATP2A2	AT2A2_HUMAN Sarcoplasmic/endoplasmic reticulum calcium ATPase 2 OS=Homo sapiens OX=9606 GN=ATP2A2 PE=1 SV=1	NYLEPGKEC(BTD[C])VQPATK|NYLEPGKEC(BTD[C])VQPATK	2|2	0.85|0.92	0.885	0.0495	4	2
556	P62979	149	RPS27A	RS27A_HUMAN Ubiquitin-40S ribosomal protein S27a OS=Homo sapiens OX=9606 GN=RPS27A PE=1 SV=2	CCLTYC(BTD[C])FNKPEDK|CCLTYC(BTD[C])FNKPEDK	3|1	1.05|0.72	0.885	0.23335	4	2
557	Q96AE4	132	FUBP1	FUBP1_HUMAN Far upstream element-binding protein 1 OS=Homo sapiens OX=9606 GN=FUBP1 PE=1 SV=3	IQQESGC(BTD[C])K|	3|	0.88|	0.88	NA	3	1
558	O75369	1868	FLNB	FLNB_HUMAN Filamin-B OS=Homo sapiens OX=9606 GN=FLNB PE=1 SV=2	AEISC(BTD[C])IDNK|	1|	0.88|	0.88	NA	1	1
559	Q9BVJ7	95	DUSP23	DUS23_HUMAN Dual specificity protein phosphatase 23 OS=Homo sapiens OX=9606 GN=DUSP23 PE=1 SV=1	GEAVGVHC(BTD[C])ALGFGR|	2|	0.88|	0.88	NA	2	1	Active site
560	Q07020	134	RPL18	RL18_HUMAN 60S ribosomal protein L18 OS=Homo sapiens OX=9606 GN=RPL18 PE=1 SV=2	GC(BTD[C])GTVLLSGPR|	3|	0.88|	0.88	NA	3	1
561	Q09666	5382	AHNAK	AHNK_HUMAN Neuroblast differentiation-associated protein AHNAK OS=Homo sapiens OX=9606 GN=AHNAK PE=1 SV=2	|GPSLQGDLAVSGDIKC(BTD[C])PK	|1	|0.87	0.87	NA	1	1
562	Q92667	102	AKAP1	AKAP1_HUMAN A-kinase anchor protein 1, mitochondrial OS=Homo sapiens OX=9606 GN=AKAP1 PE=1 SV=1	|LPAEPPALLQTHPPC(BTD[C])R	|1	|0.87	0.87	NA	1	1
563	P13639	67	EEF2	EF2_HUMAN Elongation factor 2 OS=Homo sapiens OX=9606 GN=EEF2 PE=1 SV=4	KDEQERC(BTD[C])ITIK DEQERC(BTD[C])ITIK|KDEQERC(BTD[C])ITIK	5|1	0.91|0.82	0.865	0.06364	6	2
564	P31947	38	SFN	1433S_HUMAN 14-3-3 protein sigma OS=Homo sapiens OX=9606 GN=SFN PE=1 SV=1	GEELSC(BTD[C])EER|GEELSC(BTD[C])EER	4|2	0.96|0.77	0.865	0.13435	6	2
565	P53396	20	ACLY	ACLY_HUMAN ATP-citrate synthase OS=Homo sapiens OX=9606 GN=ACLY PE=1 SV=3	IC(BTD[C])TTSAIQNR FIC(BTD[C])TTSAIQNR|IC(BTD[C])TTSAIQNR	8|4	0.71|1.005	0.8575	0.2086	12	2
566	P53618	684	COPB1	COPB_HUMAN Coatomer subunit beta OS=Homo sapiens OX=9606 GN=COPB1 PE=1 SV=3	NEMNC(BTD[C])K|NEMNC(BTD[C])K	2|1	0.78|0.92	0.85	0.09899	3	2
567	P14625	138	HSP90B1	ENPL_HUMAN Endoplasmin OS=Homo sapiens OX=9606 GN=HSP90B1 PE=1 SV=1	IKC(BTD[C])DKEK|	1|	0.85|	0.85	NA	1	1	Disulfide bond
568	Q6PK04	53	CCDC137	CC137_HUMAN Coiled-coil domain-containing protein 137 OS=Homo sapiens OX=9606 GN=CCDC137 PE=1 SV=1	VNC(BTD[C])KPK|	1|	0.85|	0.85	NA	1	1
569	Q02543	137	RPL18A	RL18A_HUMAN 60S ribosomal protein L18a OS=Homo sapiens OX=9606 GN=RPL18A PE=1 SV=2	|VEEIAASKC(BTD[C])R	|1	|0.85	0.85	NA	1	1
570	Q8NFJ5	284	GPRC5A	RAI3_HUMAN Retinoic acid-induced protein 3 OS=Homo sapiens OX=9606 GN=GPRC5A PE=1 SV=2	|NPMDYPVEDAFC(BTD[C])KPQLVK	|1	|0.84	0.84	NA	1	1
571	P21333	1157	FLNA	FLNA_HUMAN Filamin-A OS=Homo sapiens OX=9606 GN=FLNA PE=1 SV=4	AHVVPC(BTD[C])FDASK|AHVVPC(BTD[C])FDASK	2|2	0.78|0.895	0.8375	0.08132	4	2
572	Q9UHD1	86	CHORDC1	CHRD1_HUMAN Cysteine and histidine-rich domain-containing protein 1 OS=Homo sapiens OX=9606 GN=CHORDC1 PE=1 SV=2	ELC(BTD[C])ELKPK|ELC(BTD[C])ELKPK	2|2	0.89|0.775	0.8325	0.08132	4	2
573	P46782	66	RPS5	RS5_HUMAN 40S ribosomal protein S5 OS=Homo sapiens OX=9606 GN=RPS5 PE=1 SV=4	KAQC(BTD[C])PIVER|KAQC(BTD[C])PIVER AQC(BTD[C])PIVER	4|5	0.79|0.87	0.83	0.05657	9	2
574	P54136	32	RARS	SYRC_HUMAN Arginine--tRNA ligase, cytoplasmic OS=Homo sapiens OX=9606 GN=RARS PE=1 SV=2	LKNC(BTD[C])GCLGASPNLEQLQEENLK|	2|	0.83|	0.83	NA	2	1
575	Q14847	5	LASP1	LASP1_HUMAN LIM and SH3 domain protein 1 OS=Homo sapiens OX=9606 GN=LASP1 PE=1 SV=2	NPNC(BTD[C])AR|	1|	0.82|	0.82	NA	1	1
576	P62244	72	RPS15A	RS15A_HUMAN 40S ribosomal protein S15a OS=Homo sapiens OX=9606 GN=RPS15A PE=1 SV=2	LNKC(BTD[C])GVISPR|LNKC(BTD[C])GVISPR	3|4	0.85|0.79	0.82	0.04243	7	2
577	P49368	213	CCT3	TCPG_HUMAN T-complex protein 1 subunit gamma OS=Homo sapiens OX=9606 GN=CCT3 PE=1 SV=4	|IPGGIIEDSC(BTD[C])VLR	|1	|0.82	0.82	NA	1	1
578	Q96TA1	466	FAM129B	NIBL1_HUMAN Niban-like protein 1 OS=Homo sapiens OX=9606 GN=FAM129B PE=1 SV=3	GPTKEELC(BTD[C])K|GPTKEELC(BTD[C])K	3|2	0.75|0.875	0.8125	0.08839	5	2
579	P13639	41	EEF2	EF2_HUMAN Elongation factor 2 OS=Homo sapiens OX=9606 GN=EEF2 PE=1 SV=4	TDSLVC(BTD[C])K LTDSLVC(BTD[C])K STLTDSLVC(BTD[C])K|	5|	0.81|	0.81	NA	5	1
580	Q8NC51	11	SERBP1	PAIRB_HUMAN Plasminogen activator inhibitor 1 RNA-binding protein OS=Homo sapiens OX=9606 GN=SERBP1 PE=1 SV=2	PGHLQEGFGC(BTD[C])VVTNR|PGHLQEGFGC(BTD[C])VVTNR	2|2	0.85|0.77	0.81	0.05657	4	2
581	P57721	141	PCBP3	PCBP3_HUMAN Poly(rC)-binding protein 3 OS=Homo sapiens OX=9606 GN=PCBP3 PE=2 SV=2	LVVPASQC(BTD[C])GSLIGK|	1|	0.81|	0.81	NA	1	1
582	Q15365	54	PCBP1	PCBP1_HUMAN Poly(rC)-binding protein 1 OS=Homo sapiens OX=9606 GN=PCBP1 PE=1 SV=2	|ISEGNC(BTD[C])PER	|2	|0.81	0.81	NA	2	1
583	Q00839	562	HNRNPU	HNRPU_HUMAN Heterogeneous nuclear ribonucleoprotein U OS=Homo sapiens OX=9606 GN=HNRNPU PE=1 SV=6	APQC(BTD[C])LGK|APQC(BTD[C])LGK	2|2	0.85|0.75	0.8	0.07071	4	2
584	P62937	115	PPIA	PPIA_HUMAN Peptidyl-prolyl cis-trans isomerase A OS=Homo sapiens OX=9606 GN=PPIA PE=1 SV=2	HTGPGILSMANAGPNTNGSQFFIC(BTD[C])TAK|	1|	0.8|	0.8	NA	1	1
585	Q99613	752	EIF3C	EIF3C_HUMAN Eukaryotic translation initiation factor 3 subunit C OS=Homo sapiens OX=9606 GN=EIF3C PE=1 SV=1	TC(BTD[C])HSFIINEK|TC(BTD[C])HSFIINEK	3|1	1.04|0.55	0.795	0.34648	4	2
586	P04406	152	GAPDH	G3P_HUMAN Glyceraldehyde-3-phosphate dehydrogenase OS=Homo sapiens OX=9606 GN=GAPDH PE=1 SV=3	IISNASC(BTD[C])TTNCLAPLAK|IISNASC(BTD[C])TTNCLAPLAK	1|2	0.84|0.73	0.785	0.07778	3	2	Active site, Modified residue, Modified residue, Modified residue, Modified residue
587	Q9HA64	24	FN3KRP	KT3K_HUMAN Ketosamine-3-kinase OS=Homo sapiens OX=9606 GN=FN3KRP PE=1 SV=2	TGHSGGGC(BTD[C])ISQGR|TGHSGGGC(BTD[C])ISQGR	2|1	0.78|0.77	0.775	0.00707	3	2
588	P21333	1453	FLNA	FLNA_HUMAN Filamin-A OS=Homo sapiens OX=9606 GN=FLNA PE=1 SV=4	VKC(BTD[C])SGPGLSPGMVR|VKC(BTD[C])SGPGLSPGMVR	5|3	0.85|0.7	0.775	0.10607	8	2
589	Q96KP4	205	CNDP2	CNDP2_HUMAN Cytosolic non-specific dipeptidase OS=Homo sapiens OX=9606 GN=CNDP2 PE=1 SV=2	KPC(BTD[C])ITYGLR|KPC(BTD[C])ITYGLR	3|2	0.67|0.88	0.775	0.14849	5	2
590	P61313	110	RPL15	RL15_HUMAN 60S ribosomal protein L15 OS=Homo sapiens OX=9606 GN=RPL15 PE=1 SV=2	HC(BTD[C])GALR|HC(BTD[C])GALR	1|1	0.67|0.86	0.765	0.13435	2	2
591	P62937	52	PPIA	PPIA_HUMAN Peptidyl-prolyl cis-trans isomerase A OS=Homo sapiens OX=9606 GN=PPIA PE=1 SV=2	GSC(BTD[C])FHR|	2|	0.76|	0.76	NA	2	1
592	P60981	39	DSTN	DEST_HUMAN Destrin OS=Homo sapiens OX=9606 GN=DSTN PE=1 SV=3	IFC(BTD[C])LSADKK|	1|	0.76|	0.76	NA	1	1
593	P23396	97	RPS3	RS3_HUMAN 40S ribosomal protein S3 OS=Homo sapiens OX=9606 GN=RPS3 PE=1 SV=2	GLC(BTD[C])AIAQAESLR|	2|	0.76|	0.76	NA	2	1
594	P49327	2202	FASN	FAS_HUMAN Fatty acid synthase OS=Homo sapiens OX=9606 GN=FASN PE=1 SV=3	|ADEASELAC(BTD[C])PTPK	|2	|0.76	0.76	NA	2	1
595	P78527	491	PRKDC	PRKDC_HUMAN DNA-dependent protein kinase catalytic subunit OS=Homo sapiens OX=9606 GN=PRKDC PE=1 SV=3	IC(BTD[C])SKPVVLPK|	1|	0.74|	0.74	NA	1	1
596	P17655	82	CAPN2	CAN2_HUMAN Calpain-2 catalytic subunit OS=Homo sapiens OX=9606 GN=CAPN2 PE=1 SV=6	|RPTEIC(BTD[C])ADPQFIIGGATR	|1	|0.74	0.74	NA	1	1
597	O75369	1617	FLNB	FLNB_HUMAN Filamin-B OS=Homo sapiens OX=9606 GN=FLNB PE=1 SV=2	ATQTGDASKC(BTD[C])LATGPGIASTVK|ATQTGDASKC(BTD[C])LATGPGIASTVK	2|1	0.655|0.77	0.7125	0.08132	3	2
598	Q13501	113	SQSTM1	SQSTM_HUMAN Sequestosome-1 OS=Homo sapiens OX=9606 GN=SQSTM1 PE=1 SV=1	DHRPPC(BTD[C])AQEAPR|	2|	0.7|	0.7	NA	2	1
599	Q15233	145	NONO	NONO_HUMAN Non-POU domain-containing octamer-binding protein OS=Homo sapiens OX=9606 GN=NONO PE=1 SV=4	|FAC(BTD[C])HSASLTVR	|1	|0.7	0.7	NA	1	1
600	O75153	1196	CLUH	CLU_HUMAN Clustered mitochondria protein homolog OS=Homo sapiens OX=9606 GN=CLUH PE=1 SV=2	|ESSEYLKC(BTD[C])LTQQAVALQR	|1	|0.7	0.7	NA	1	1
601	Q6PUV4	90	CPLX2	CPLX2_HUMAN Complexin-2 OS=Homo sapiens OX=9606 GN=CPLX2 PE=2 SV=2	AALEQPC(BTD[C])EGSLTRPK|AALEQPC(BTD[C])EGSLTRPK	2|1	0.67|0.7	0.685	0.02121	3	2
602	P27348	134	YWHAQ	1433T_HUMAN 14-3-3 protein theta OS=Homo sapiens OX=9606 GN=YWHAQ PE=1 SV=1	YLAEVAC(BTD[C])GDDRK|YLAEVAC(BTD[C])GDDRK	2|1	0.71|0.64	0.675	0.0495	3	2
603	Q13085	813	ACACA	ACACA_HUMAN Acetyl-CoA carboxylase 1 OS=Homo sapiens OX=9606 GN=ACACA PE=1 SV=2	|RPGAALDPGC(BTD[C])VLAK	|1	|0.66	0.66	NA	1	1
604	P15880	182	RPS2	RS2_HUMAN 40S ribosomal protein S2 OS=Homo sapiens OX=9606 GN=RPS2 PE=1 SV=2	IGKPHTVPC(BTD[C])K PHTVPC(BTD[C])K|IGKPHTVPC(BTD[C])K PHTVPC(BTD[C])K	4|4	0.66|0.635	0.6475	0.01768	8	2
605	P00367	376	GLUD1	DHE3_HUMAN Glutamate dehydrogenase 1, mitochondrial OS=Homo sapiens OX=9606 GN=GLUD1 PE=1 SV=2	|AKPYEGSILEADC(BTD[C])DILIPAASEK	|1	|0.64	0.64	NA	1	1
606	Q8TDN6	52	BRIX1	BRX1_HUMAN Ribosome biogenesis protein BRX1 homolog OS=Homo sapiens OX=9606 GN=BRIX1 PE=1 SV=2	PGPVC(BTD[C])K|	1|	0.61|	0.61	NA	1	1
607	Q9BRX8	85	PRXL2A	PXL2A_HUMAN Peroxiredoxin-like 2A OS=Homo sapiens OX=9606 GN=PRXL2A PE=1 SV=3	|RPGC(BTD[C])FLCR	|1	|0.6	0.6	NA	1	1	Active site
608	Q16762	248	TST	THTR_HUMAN Thiosulfate sulfurtransferase OS=Homo sapiens OX=9606 GN=TST PE=1 SV=4	KVDLSQPLIATC(BTD[C])R|KVDLSQPLIATC(BTD[C])R VDLSQPLIATC(BTD[C])R	1|5	0.55|0.63	0.59	0.05657	6	2	Active site
609	Q15723	110	ELF2	ELF2_HUMAN ETS-related transcription factor Elf-2 OS=Homo sapiens OX=9606 GN=ELF2 PE=1 SV=2	SPTC(BTD[C])LR|	1|	0.58|	0.58	NA	1	1
610	A5A3E0	972	POTEF	POTEF_HUMAN POTE ankyrin domain family member F OS=Homo sapiens OX=9606 GN=POTEF PE=1 SV=2	|CPEALFQPCFLGMESC(BTD[C])GIHETTFNSIMK	|1	|0.57	0.57	NA	1	1
611	O95347	800	SMC2	SMC2_HUMAN Structural maintenance of chromosomes protein 2 OS=Homo sapiens OX=9606 GN=SMC2 PE=1 SV=2	|KLDC(BTD[C])AK	|1	|0.55	0.55	NA	1	1
612	P04083	270	ANXA1	ANXA1_HUMAN Annexin A1 OS=Homo sapiens OX=9606 GN=ANXA1 PE=1 SV=2	C(BTD[C])ATSKPAFFAEK|	1|	0.5|	0.5	NA	1	1
613	P33176	421	KIF5B	KINH_HUMAN Kinesin-1 heavy chain OS=Homo sapiens OX=9606 GN=KIF5B PE=1 SV=1	|RKC(BTD[C])EEEIAK	|1	|0.45	0.45	NA	1	1

## Sheet: Bio
Rank	Leading AC	Site	Genename	Description	Modified sequences	Spectrum count	All ratio	Ratio average	Ratio SD	Total spectrum count	Repeat counts	Function annotation
1	P54819	92	AK2	KAD2_HUMAN Adenylate kinase 2, mitochondrial OS=Homo sapiens OX=9606 GN=AK2 PE=1 SV=2	|NLETPLC(BTD[C])K	|1	|4.3	4.3	NA	1	1	Disulfide bond
2	Q9Y2A7	327	NCKAP1	NCKP1_HUMAN Nck-associated protein 1 OS=Homo sapiens OX=9606 GN=NCKAP1 PE=1 SV=1	INDIREC(BTD[C])K|	1|	3.38|	3.38	NA	1	1
3	P23526	195	AHCY	SAHH_HUMAN Adenosylhomocysteinase OS=Homo sapiens OX=9606 GN=AHCY PE=1 SV=4	FDNLYGC(BTD[C])R|	2|	2.45|	2.45	NA	2	1
4	Q15149	965	PLEC	PLEC_HUMAN Plectin OS=Homo sapiens OX=9606 GN=PLEC PE=1 SV=3	GDEC(BTD[C])QLVGPAQPSHWK|	1|	2.12|	2.12	NA	1	1
5	O95861	59	BPNT1	BPNT1_HUMAN 3'(2'),5'-bisphosphate nucleotidase 1 OS=Homo sapiens OX=9606 GN=BPNT1 PE=1 SV=1	|IC(BTD[C])SSLAR	|1	|1.99	1.99	NA	1	1
6	Q15149	3295	PLEC	PLEC_HUMAN Plectin OS=Homo sapiens OX=9606 GN=PLEC PE=1 SV=3	VPLDVAC(BTD[C])AR|	2|	1.97|	1.97	NA	2	1
7	P00505	187	GOT2	AATM_HUMAN Aspartate aminotransferase, mitochondrial OS=Homo sapiens OX=9606 GN=GOT2 PE=1 SV=3	TC(BTD[C])GFDFTGAVEDISK|	2|	1.9|	1.9	NA	2	1
8	P62140	61	PPP1CB	PP1B_HUMAN Serine/threonine-protein phosphatase PP1-beta catalytic subunit OS=Homo sapiens OX=9606 GN=PPP1CB PE=1 SV=3	|IC(BTD[C])GDIHGQYTDLLR	|1	|1.89	1.89	NA	1	1
9	P63000	105	RAC1	RAC1_HUMAN Ras-related C3 botulinum toxin substrate 1 OS=Homo sapiens OX=9606 GN=RAC1 PE=1 SV=1	HHC(BTD[C])PNTPIILVGTK|HHC(BTD[C])PNTPIILVGTK	2|1	1.37|2.34	1.855	0.68589	3	2
10	P00352	370	ALDH1A1	AL1A1_HUMAN Retinal dehydrogenase 1 OS=Homo sapiens OX=9606 GN=ALDH1A1 PE=1 SV=2	LEC(BTD[C])GGGPWGNK|	1|	1.85|	1.85	NA	1	1
11	P53396	1040	ACLY	ACLY_HUMAN ATP-citrate synthase OS=Homo sapiens OX=9606 GN=ACLY PE=1 SV=3	NC(BTD[C])GSFTR|	1|	1.8|	1.8	NA	1	1
12	Q16719	45	KYNU	KYNU_HUMAN Kynureninase OS=Homo sapiens OX=9606 GN=KYNU PE=1 SV=1	FREC(BTD[C])FYIPK|REC(BTD[C])FYIPK	1|1	2.31|1.28	1.795	0.72832	2	2
13	P23528	80	CFL1	COF1_HUMAN Cofilin-1 OS=Homo sapiens OX=9606 GN=CFL1 PE=1 SV=3	MLPDKDC(BTD[C])R|MLPDKDC(BTD[C])R	7|7	1.62|1.89	1.755	0.19092	14	2
14	P25398	69	RPS12	RS12_HUMAN 40S ribosomal protein S12 OS=Homo sapiens OX=9606 GN=RPS12 PE=1 SV=3	|LVEALC(BTD[C])AEHQINLIK	|2	|1.75	1.75	NA	2	1
15	O14818	91	PSMA7	PSA7_HUMAN Proteasome subunit alpha type-7 OS=Homo sapiens OX=9606 GN=PSMA7 PE=1 SV=1	VEC(BTD[C])QSHR|VEC(BTD[C])QSHR	4|1	1.735|1.74	1.7375	0.00354	5	2
16	P40925	251	MDH1	MDHC_HUMAN Malate dehydrogenase, cytoplasmic OS=Homo sapiens OX=9606 GN=MDH1 PE=1 SV=4	|AIC(BTD[C])DHVR	|1	|1.71	1.71	NA	1	1
17	P07237	343	P4HB	PDIA1_HUMAN Protein disulfide-isomerase OS=Homo sapiens OX=9606 GN=P4HB PE=1 SV=3	ITEFC(BTD[C])HR|ITEFC(BTD[C])HR	1|2	1.73|1.665	1.6975	0.04596	3	2
18	Q99700	892	ATXN2	ATX2_HUMAN Ataxin-2 OS=Homo sapiens OX=9606 GN=ATXN2 PE=1 SV=2	|RGPEVTSQGVQTSSPAC(BTD[C])K	|1	|1.69	1.69	NA	1	1
19	P47813	51	EIF1AX	IF1AX_HUMAN Eukaryotic translation initiation factor 1A, X-chromosomal OS=Homo sapiens OX=9606 GN=EIF1AX PE=1 SV=2	MC(BTD[C])FDGVK|	1|	1.68|	1.68	NA	1	1
20	Q92841	166	DDX17	DDX17_HUMAN Probable ATP-dependent RNA helicase DDX17 OS=Homo sapiens OX=9606 GN=DDX17 PE=1 SV=2	|GGDVC(BTD[C])PK	|1	|1.67	1.67	NA	1	1
21	P49915	554	GMPS	GUAA_HUMAN GMP synthase [glutamine-hydrolyzing] OS=Homo sapiens OX=9606 GN=GMPS PE=1 SV=1	MC(BTD[C])HNVNR|MC(BTD[C])HNVNR	4|4	1.76|1.55	1.655	0.14849	8	2
22	P17081	163	RHOQ	RHOQ_HUMAN Rho-related GTP-binding protein RhoQ OS=Homo sapiens OX=9606 GN=RHOQ PE=1 SV=2	|YVEC(BTD[C])SALTQK	|3	|1.63	1.63	NA	3	1
23	P35232	69	PHB	PHB_HUMAN Prohibitin OS=Homo sapiens OX=9606 GN=PHB PE=1 SV=1	|PIIFDC(BTD[C])R	|1	|1.63	1.63	NA	1	1
24	Q16836	211	HADH	HCDH_HUMAN Hydroxyacyl-coenzyme A dehydrogenase, mitochondrial OS=Homo sapiens OX=9606 GN=HADH PE=1 SV=3	HPVSC(BTD[C])K|HPVSC(BTD[C])K	2|3	1.605|1.65	1.6275	0.03182	5	2
25	P27797	105	CALR	CALR_HUMAN Calreticulin OS=Homo sapiens OX=9606 GN=CALR PE=1 SV=1	HEQNIDC(BTD[C])GGGYVK|HEQNIDC(BTD[C])GGGYVK	1|2	1.61|1.62	1.615	0.00707	3	2	Disulfide bond
26	P22392	145	NME2	NDKB_HUMAN Nucleoside diphosphate kinase B OS=Homo sapiens OX=9606 GN=NME2 PE=1 SV=1	SC(BTD[C])AHDWVYE|SC(BTD[C])AHDWVYE	2|2	1.73|1.49	1.61	0.16971	4	2
27	Q01082	604	SPTBN1	SPTB2_HUMAN Spectrin beta chain, non-erythrocytic 1 OS=Homo sapiens OX=9606 GN=SPTBN1 PE=1 SV=2	|FATDGEGYKPC(BTD[C])DPQVIR	|1	|1.61	1.61	NA	1	1
28	Q01518	416	CAP1	CAP1_HUMAN Adenylyl cyclase-associated protein 1 OS=Homo sapiens OX=9606 GN=CAP1 PE=1 SV=5	TDGC(BTD[C])HAYLSK|	2|	1.6|	1.6	NA	2	1
29	P22314	179	UBA1	UBA1_HUMAN Ubiquitin-like modifier-activating enzyme 1 OS=Homo sapiens OX=9606 GN=UBA1 PE=1 SV=3	VGEFC(BTD[C])HNR|VGEFC(BTD[C])HNR	2|2	1.57|1.6	1.585	0.02121	4	2
30	Q2VIR3	348	EIF2S3B	IF2GL_HUMAN Eukaryotic translation initiation factor 2 subunit 3B OS=Homo sapiens OX=9606 GN=EIF2S3B PE=2 SV=2	IDPTLC(BTD[C])R|IDPTLC(BTD[C])R	2|1	1.92|1.23	1.575	0.4879	3	2
31	P17174	46	GOT1	AATC_HUMAN Aspartate aminotransferase, cytoplasmic OS=Homo sapiens OX=9606 GN=GOT1 PE=1 SV=3	TDDC(BTD[C])HPWVLPVVK|	1|	1.56|	1.56	NA	1	1
32	O75600	106	GCAT	KBL_HUMAN 2-amino-3-ketobutyrate coenzyme A ligase, mitochondrial OS=Homo sapiens OX=9606 GN=GCAT PE=1 SV=1	FIC(BTD[C])GTQSIHK|FIC(BTD[C])GTQSIHK	3|2	1.54|1.57	1.555	0.02121	5	2
33	P49327	1127	FASN	FAS_HUMAN Fatty acid synthase OS=Homo sapiens OX=9606 GN=FASN PE=1 SV=3	|FCFTPHTEEGC(BTD[C])LSER	|1	|1.55	1.55	NA	1	1
34	P40939	747	HADHA	ECHA_HUMAN Trifunctional enzyme subunit alpha, mitochondrial OS=Homo sapiens OX=9606 GN=HADHA PE=1 SV=2	|QFTPC(BTD[C])QLLADHANSPNKK QFTPC(BTD[C])QLLADHANSPNK	|3	|1.55	1.55	NA	3	1
35	Q00839	335	HNRNPU	HNRPU_HUMAN Heterogeneous nuclear ribonucleoprotein U OS=Homo sapiens OX=9606 GN=HNRNPU PE=1 SV=6	VC(BTD[C])FEMK|	2|	1.54|	1.54	NA	2	1
36	O14744	42	PRMT5	ANM5_HUMAN Protein arginine N-methyltransferase 5 OS=Homo sapiens OX=9606 GN=PRMT5 PE=1 SV=4	LC(BTD[C])MPVFHPR|	1|	1.54|	1.54	NA	1	1
37	P61313	110	RPL15	RL15_HUMAN 60S ribosomal protein L15 OS=Homo sapiens OX=9606 GN=RPL15 PE=1 SV=2	|HC(BTD[C])GALR	|2	|1.54	1.54	NA	2	1
38	P35606	56	COPB2	COPB2_HUMAN Coatomer subunit beta' OS=Homo sapiens OX=9606 GN=COPB2 PE=1 SV=2	|FEVC(BTD[C])DLPVR	|1	|1.54	1.54	NA	1	1
39	Q01082	112	SPTBN1	SPTB2_HUMAN Spectrin beta chain, non-erythrocytic 1 OS=Homo sapiens OX=9606 GN=SPTBN1 PE=1 SV=2	IHC(BTD[C])LENVDK|IHC(BTD[C])LENVDK	3|2	1.5|1.57	1.535	0.0495	5	2
40	P78417	192	GSTO1	GSTO1_HUMAN Glutathione S-transferase omega-1 OS=Homo sapiens OX=9606 GN=GSTO1 PE=1 SV=2	LNEC(BTD[C])VDHTPK|LNEC(BTD[C])VDHTPK	2|1	1.55|1.49	1.52	0.04243	3	2
41	Q15149	530	PLEC	PLEC_HUMAN Plectin OS=Homo sapiens OX=9606 GN=PLEC PE=1 SV=3	LEC(BTD[C])LQR|	1|	1.51|	1.51	NA	1	1
42	P06744	404	GPI	G6PI_HUMAN Glucose-6-phosphate isomerase OS=Homo sapiens OX=9606 GN=GPI PE=1 SV=4	MIPC(BTD[C])DFLIPVQTQHPIR|MIPC(BTD[C])DFLIPVQTQHPIR	4|7	1.45|1.57	1.51	0.08485	11	2
43	Q9UQ80	179	PA2G4	PA2G4_HUMAN Proliferation-associated protein 2G4 OS=Homo sapiens OX=9606 GN=PA2G4 PE=1 SV=3	VAHSFNC(BTD[C])TPIEGMLSHQLK|	2|	1.5|	1.5	NA	2	1
44	P18206	85	VCL	VINC_HUMAN Vinculin OS=Homo sapiens OX=9606 GN=VCL PE=1 SV=4	|VENAC(BTD[C])TK	|1	|1.5	1.5	NA	1	1
45	P50395	302	GDI2	GDIB_HUMAN Rab GDP dissociation inhibitor beta OS=Homo sapiens OX=9606 GN=GDI2 PE=1 SV=2	VIC(BTD[C])ILSHPIK|	2|	1.49|	1.49	NA	2	1
46	P09651	175	HNRNPA1	ROA1_HUMAN Heterogeneous nuclear ribonucleoprotein A1 OS=Homo sapiens OX=9606 GN=HNRNPA1 PE=1 SV=5	YHTVNGHNC(BTD[C])EVR GHNC(BTD[C])EVR|	2|	1.48|	1.48	NA	2	1
47	Q8NC51	11	SERBP1	PAIRB_HUMAN Plasminogen activator inhibitor 1 RNA-binding protein OS=Homo sapiens OX=9606 GN=SERBP1 PE=1 SV=2	PGHLQEGFGC(BTD[C])VVTNR|	2|	1.48|	1.48	NA	2	1
48	P35579	671	MYH9	MYH9_HUMAN Myosin-9 OS=Homo sapiens OX=9606 GN=MYH9 PE=1 SV=4	C(BTD[C])IIPNHEK|C(BTD[C])IIPNHEK	3|2	1.42|1.54	1.48	0.08485	5	2
49	O00232	193	PSMD12	PSD12_HUMAN 26S proteasome non-ATPase regulatory subunit 12 OS=Homo sapiens OX=9606 GN=PSMD12 PE=1 SV=3	LC(BTD[C])LAVK|	1|	1.48|	1.48	NA	1	1
50	P35237	100	SERPINB6	SPB6_HUMAN Serpin B6 OS=Homo sapiens OX=9606 GN=SERPINB6 PE=1 SV=3	SC(BTD[C])DFLSSFR|	1|	1.48|	1.48	NA	1	1
51	Q86SE5	51	RALYL	RALYL_HUMAN RNA-binding Raly-like protein OS=Homo sapiens OX=9606 GN=RALYL PE=1 SV=2	|VGC(BTD[C])SVHK IVGC(BTD[C])SVHK	|4	|1.48	1.48	NA	4	1
52	Q9Y237	45	PIN4	PIN4_HUMAN Peptidyl-prolyl cis-trans isomerase NIMA-interacting 4 OS=Homo sapiens OX=9606 GN=PIN4 PE=1 SV=1	|HILC(BTD[C])EK	|1	|1.48	1.48	NA	1	1
53	P63220	56	RPS21	RS21_HUMAN 40S ribosomal protein S21 OS=Homo sapiens OX=9606 GN=RPS21 PE=1 SV=1	|AIC(BTD[C])GAIR	|1	|1.48	1.48	NA	1	1
54	P09382	17	LGALS1	LEG1_HUMAN Galectin-1 OS=Homo sapiens OX=9606 GN=LGALS1 PE=1 SV=2	KPGEC(BTD[C])LR LKPGEC(BTD[C])LR LNLKPGEC(BTD[C])LR|KPGEC(BTD[C])LR LKPGEC(BTD[C])LR NLKPGEC(BTD[C])LR SNLNLKPGEC(BTD[C])LR NLNLKPGEC(BTD[C])LR GLVASNLNLKPGEC(BTD[C])LR	7|9	1.49|1.46	1.475	0.02121	16	2
55	O43347	167	MSI1	MSI1H_HUMAN RNA-binding protein Musashi homolog 1 OS=Homo sapiens OX=9606 GN=MSI1 PE=1 SV=1	VC(BTD[C])EIHFHEINNK|	1|	1.47|	1.47	NA	1	1
56	P09211	48	GSTP1	GSTP1_HUMAN Glutathione S-transferase P OS=Homo sapiens OX=9606 GN=GSTP1 PE=1 SV=2	SC(BTD[C])LYGQLPK|SC(BTD[C])LYGQLPK	2|1	1.59|1.35	1.47	0.16971	3	2
57	O15144	120	ARPC2	ARPC2_HUMAN Actin-related protein 2/3 complex subunit 2 OS=Homo sapiens OX=9606 GN=ARPC2 PE=1 SV=1	NC(BTD[C])FASVFEK|NC(BTD[C])FASVFEK	2|1	1.72|1.22	1.47	0.35355	3	2
58	O43684	270	BUB3	BUB3_HUMAN Mitotic checkpoint protein BUB3 OS=Homo sapiens OX=9606 GN=BUB3 PE=1 SV=1	|LC(BTD[C])QFHR	|1	|1.46	1.46	NA	1	1
59	P62820	126	RAB1A	RAB1A_HUMAN Ras-related protein Rab-1A OS=Homo sapiens OX=9606 GN=RAB1A PE=1 SV=3	LLVGNKC(BTD[C])DLTTK|	2|	1.455|	1.455	NA	2	1
60	Q9NX74	154	DUS2	DUS2L_HUMAN tRNA-dihydrouridine(20) synthase [NAD(P)+]-like OS=Homo sapiens OX=9606 GN=DUS2 PE=1 SV=1	RPVTC(BTD[C])K|	1|	1.45|	1.45	NA	1	1
61	Q00610	1205	CLTC	CLH1_HUMAN Clathrin heavy chain 1 OS=Homo sapiens OX=9606 GN=CLTC PE=1 SV=5	LAELEEFINGPNNAHIQQVGDRC(BTD[C])YDEK|	2|	1.45|	1.45	NA	2	1
62	P18206	737	VCL	VINC_HUMAN Vinculin OS=Homo sapiens OX=9606 GN=VCL PE=1 SV=4	DLDKC(BTD[C])K KDLDKC(BTD[C])K|	2|	1.435|	1.435	NA	2	1
63	P17812	30	CTPS1	PYRG1_HUMAN CTP synthase 1 OS=Homo sapiens OX=9606 GN=CTPS1 PE=1 SV=2	SC(BTD[C])GLHVTSIK|SC(BTD[C])GLHVTSIK	1|2	1.55|1.31	1.43	0.16971	3	2
64	P14618	31	PKM	KPYM_HUMAN Pyruvate kinase PKM OS=Homo sapiens OX=9606 GN=PKM PE=1 SV=4	LEHMC(BTD[C])R FLEHMC(BTD[C])R TFLEHMC(BTD[C])R ADTFLEHMC(BTD[C])R AAMADTFLEHMC(BTD[C])R DTFLEHMC(BTD[C])R MADTFLEHMC(BTD[C])R|LEHMC(BTD[C])R TFLEHMC(BTD[C])R ADTFLEHMC(BTD[C])R MADTFLEHMC(BTD[C])R FLEHMC(BTD[C])R AAMADTFLEHMC(BTD[C])R	25|22	1.36|1.495	1.4275	0.09546	47	2
65	P00352	126	ALDH1A1	AL1A1_HUMAN Retinal dehydrogenase 1 OS=Homo sapiens OX=9606 GN=ALDH1A1 PE=1 SV=2	LYSNAYLNDLAGC(BTD[C])IK|	1|	1.42|	1.42	NA	1	1
66	P27361	82	MAPK3	MK03_HUMAN Mitogen-activated protein kinase 3 OS=Homo sapiens OX=9606 GN=MAPK3 PE=1 SV=4	|SPFEHQTYC(BTD[C])QR ISPFEHQTYC(BTD[C])QR	|3	|1.42	1.42	NA	3	1
67	P49590	380	HARS2	SYHM_HUMAN Probable histidine--tRNA ligase, mitochondrial OS=Homo sapiens OX=9606 GN=HARS2 PE=1 SV=1	VPC(BTD[C])VGLSIGVER|VPC(BTD[C])VGLSIGVER	2|2	1.37|1.46	1.415	0.06364	4	2
68	Q14847	29	LASP1	LASP1_HUMAN LIM and SH3 domain protein 1 OS=Homo sapiens OX=9606 GN=LASP1 PE=1 SV=2	AC(BTD[C])FHCETCK|AC(BTD[C])FHCETCK	6|6	1.425|1.4	1.4125	0.01768	12	2
69	O60701	112	UGDH	UGDH_HUMAN UDP-glucose 6-dehydrogenase OS=Homo sapiens OX=9606 GN=UGDH PE=1 SV=1	YIEAC(BTD[C])AR|YIEAC(BTD[C])AR	2|1	1.5|1.32	1.41	0.12728	3	2
70	P38117	42	ETFB	ETFB_HUMAN Electron transfer flavoprotein subunit beta OS=Homo sapiens OX=9606 GN=ETFB PE=1 SV=3	HSMNPFC(BTD[C])EIAVEEAVR|HSMNPFC(BTD[C])EIAVEEAVR	1|1	1.93|0.89	1.41	0.73539	2	2
71	P30086	133	PEBP1	PEBP1_HUMAN Phosphatidylethanolamine-binding protein 1 OS=Homo sapiens OX=9606 GN=PEBP1 PE=1 SV=3	PLKC(BTD[C])DEPILSNR|PLKC(BTD[C])DEPILSNR	3|3	1.56|1.25	1.405	0.2192	6	2
72	Q9BYT8	255	NLN	NEUL_HUMAN Neurolysin, mitochondrial OS=Homo sapiens OX=9606 GN=NLN PE=1 SV=1	KC(BTD[C])CIPETR|KC(BTD[C])CIPETR	4|3	1.585|1.22	1.4025	0.25809	7	2
73	P35754	26	GLRX	GLRX1_HUMAN Glutaredoxin-1 OS=Homo sapiens OX=9606 GN=GLRX PE=1 SV=2	KPTCPYC(BTD[C])R PTCPYC(BTD[C])R|KPTCPYC(BTD[C])R	3|2	1.39|1.41	1.4	0.01414	5	2	Disulfide bond
74	P23526	228	AHCY	SAHH_HUMAN Adenosylhomocysteinase OS=Homo sapiens OX=9606 GN=AHCY PE=1 SV=4	GC(BTD[C])AQALR|GC(BTD[C])AQALR	2|2	1.46|1.34	1.4	0.08485	4	2
75	Q8NFH3	222	NUP43	NUP43_HUMAN Nucleoporin Nup43 OS=Homo sapiens OX=9606 GN=NUP43 PE=1 SV=1	|VPLHC(BTD[C])VDR	|1	|1.4	1.4	NA	1	1
76	P61006	23	RAB8A	RAB8A_HUMAN Ras-related protein Rab-8A OS=Homo sapiens OX=9606 GN=RAB8A PE=1 SV=1	|TC(BTD[C])VLFR	|2	|1.4	1.4	NA	2	1
77	Q7LBR1	25	CHMP1B	CHM1B_HUMAN Charged multivesicular body protein 1b OS=Homo sapiens OX=9606 GN=CHMP1B PE=1 SV=1	KC(BTD[C])DKEEK|KC(BTD[C])DKEEK	1|2	1.34|1.445	1.3925	0.07425	3	2
78	P62701	65	RPS4X	RS4X_HUMAN 40S ribosomal protein S4, X isoform OS=Homo sapiens OX=9606 GN=RPS4X PE=1 SV=2	KIC(BTD[C])MQR|KIC(BTD[C])MQR	4|3	1.69|1.08	1.385	0.43134	7	2
79	Q15274	96	QPRT	NADC_HUMAN Nicotinate-nucleotide pyrophosphorylase [carboxylating] OS=Homo sapiens OX=9606 GN=QPRT PE=1 SV=3	GPAHC(BTD[C])LLLGER|GPAHC(BTD[C])LLLGER	3|2	1.31|1.46	1.385	0.10607	5	2
80	Q01518	375	CAP1	CAP1_HUMAN Adenylyl cyclase-associated protein 1 OS=Homo sapiens OX=9606 GN=CAP1 PE=1 SV=5	|INSITVDNC(BTD[C])K	|1	|1.38	1.38	NA	1	1
81	P08865	163	RPSA	RSSA_HUMAN 40S ribosomal protein SA OS=Homo sapiens OX=9606 GN=RPSA PE=1 SV=4	YVDIAIPC(BTD[C])NNK|YVDIAIPC(BTD[C])NNK	1|1	0.89|1.86	1.375	0.68589	2	2
82	P48643	181	CCT5	TCPE_HUMAN T-complex protein 1 subunit epsilon OS=Homo sapiens OX=9606 GN=CCT5 PE=1 SV=1	VVNSC(BTD[C])HR|VVNSC(BTD[C])HR	1|1	1.92|0.82	1.37	0.77782	2	2
83	P30838	217	ALDH3A1	AL3A1_HUMAN Aldehyde dehydrogenase, dimeric NADP-preferring OS=Homo sapiens OX=9606 GN=ALDH3A1 PE=1 SV=3	|SPC(BTD[C])YVDK	|4	|1.37	1.37	NA	4	1
84	Q08257	45	CRYZ	QOR_HUMAN Quinone oxidoreductase OS=Homo sapiens OX=9606 GN=CRYZ PE=1 SV=1	HAC(BTD[C])GVNPVETYIR|HAC(BTD[C])GVNPVETYIR	1|1	1.18|1.55	1.365	0.26163	2	2
85	Q00341	960	HDLBP	VIGLN_HUMAN Vigilin OS=Homo sapiens OX=9606 GN=HDLBP PE=1 SV=2	EKC(BTD[C])EAAK|EKC(BTD[C])EAAK	1|1	1.42|1.31	1.365	0.07778	2	2
86	O00410	1057	IPO5	IPO5_HUMAN Importin-5 OS=Homo sapiens OX=9606 GN=IPO5 PE=1 SV=4	HEDPC(BTD[C])AK|HEDPC(BTD[C])AK	1|2	1.44|1.28	1.36	0.11314	3	2
87	Q9Y5X1	427	SNX9	SNX9_HUMAN Sorting nexin-9 OS=Homo sapiens OX=9606 GN=SNX9 PE=1 SV=1	RC(BTD[C])TGPLPK|	2|	1.36|	1.36	NA	2	1
88	Q9BXJ9	102	NAA15	NAA15_HUMAN N-alpha-acetyltransferase 15, NatA auxiliary subunit OS=Homo sapiens OX=9606 GN=NAA15 PE=1 SV=1	YDEAIKC(BTD[C])YR|	1|	1.36|	1.36	NA	1	1
89	O75608	53	LYPLA1	LYPA1_HUMAN Acyl-protein thioesterase 1 OS=Homo sapiens OX=9606 GN=LYPLA1 PE=1 SV=1	YIC(BTD[C])PHAPVR|	1|	1.36|	1.36	NA	1	1
90	P61247	96	RPS3A	RS3A_HUMAN 40S ribosomal protein S3a OS=Homo sapiens OX=9606 GN=RPS3A PE=1 SV=2	NC(BTD[C])LTNFHGMDLTR|NC(BTD[C])LTNFHGMDLTR	3|2	1.22|1.495	1.3575	0.19445	5	2
91	P18206	313	VCL	VINC_HUMAN Vinculin OS=Homo sapiens OX=9606 GN=VCL PE=1 SV=4	VGELC(BTD[C])AGK|VGELC(BTD[C])AGK	2|1	1.04|1.67	1.355	0.44548	3	2
92	P35270	10	SPR	SPRE_HUMAN Sepiapterin reductase OS=Homo sapiens OX=9606 GN=SPR PE=1 SV=1	VC(BTD[C])LLTGASR|VC(BTD[C])LLTGASR	1|2	1.53|1.18	1.355	0.24749	3	2
93	Q13155	306	AIMP2	AIMP2_HUMAN Aminoacyl tRNA synthase complex-interacting multifunctional protein 2 OS=Homo sapiens OX=9606 GN=AIMP2 PE=1 SV=2	|SC(BTD[C])ENLAPFNTALK	|2	|1.355	1.355	NA	2	1
94	P10768	28	ESD	ESTD_HUMAN S-formylglutathione hydrolase OS=Homo sapiens OX=9606 GN=ESD PE=1 SV=2	HDSVELNC(BTD[C])K|FEHDSVELNC(BTD[C])K	1|1	1.12|1.58	1.35	0.32527	2	2
95	Q14764	59	MVP	MVP_HUMAN Major vault protein OS=Homo sapiens OX=9606 GN=MVP PE=1 SV=4	|HYC(BTD[C])TVANPVSR	|3	|1.35	1.35	NA	3	1
96	P10599	35	TXN	THIO_HUMAN Thioredoxin OS=Homo sapiens OX=9606 GN=TXN PE=1 SV=3	WCGPC(BTD[C])K ATWCGPC(BTD[C])K SATWCGPC(BTD[C])K FSATWCGPC(BTD[C])K VDFSATWCGPC(BTD[C])K|SATWCGPC(BTD[C])K FSATWCGPC(BTD[C])K	7|5	1.24|1.45	1.345	0.14849	12	2	Active site, Disulfide bond
97	P53602	160	MVD	MVD1_HUMAN Diphosphomevalonate decarboxylase OS=Homo sapiens OX=9606 GN=MVD PE=1 SV=1	GSGSAC(BTD[C])R|	2|	1.34|	1.34	NA	2	1
98	O43143	190	DHX15	DHX15_HUMAN Pre-mRNA-splicing factor ATP-dependent RNA helicase DHX15 OS=Homo sapiens OX=9606 GN=DHX15 PE=1 SV=2	AC(BTD[C])TQPR|AC(BTD[C])TQPR	1|1	1.21|1.47	1.34	0.18385	2	2
99	O00410	110	IPO5	IPO5_HUMAN Importin-5 OS=Homo sapiens OX=9606 GN=IPO5 PE=1 SV=4	KVC(BTD[C])DIAAELAR|	4|	1.34|	1.34	NA	4	1
100	Q99832	364	CCT7	TCPH_HUMAN T-complex protein 1 subunit eta OS=Homo sapiens OX=9606 GN=CCT7 PE=1 SV=2	YNFFTGC(BTD[C])PK|	1|	1.34|	1.34	NA	1	1
101	P27361	178	MAPK3	MK03_HUMAN Mitogen-activated protein kinase 3 OS=Homo sapiens OX=9606 GN=MAPK3 PE=1 SV=4	|DLKPSNLLINTTC(BTD[C])DLK	|1	|1.34	1.34	NA	1	1
102	P00338	131	LDHA	LDHA_HUMAN L-lactate dehydrogenase A chain OS=Homo sapiens OX=9606 GN=LDHA PE=1 SV=2	YSPNC(BTD[C])K|YSPNC(BTD[C])K	6|6	1.34|1.33	1.335	0.00707	12	2
103	Q9ULV4	330	CORO1C	COR1C_HUMAN Coronin-1C OS=Homo sapiens OX=9606 GN=CORO1C PE=1 SV=1	GLDVNKC(BTD[C])EIAR|GLDVNKC(BTD[C])EIAR	3|1	1.43|1.24	1.335	0.13435	4	2
104	Q01518	93	CAP1	CAP1_HUMAN Adenylyl cyclase-associated protein 1 OS=Homo sapiens OX=9606 GN=CAP1 PE=1 SV=5	ALLVTASQC(BTD[C])QQPAENK|ALLVTASQC(BTD[C])QQPAENK	1|1	1.45|1.22	1.335	0.16263	2	2
105	P62826	120	RAN	RAN_HUMAN GTP-binding nuclear protein Ran OS=Homo sapiens OX=9606 GN=RAN PE=1 SV=3	VCENIPIVLC(BTD[C])GNK|VCENIPIVLC(BTD[C])GNK	2|2	1.305|1.36	1.3325	0.03889	4	2
106	Q13347	76	EIF3I	EIF3I_HUMAN Eukaryotic translation initiation factor 3 subunit I OS=Homo sapiens OX=9606 GN=EIF3I PE=1 SV=1	HVLTGSADNSC(BTD[C])R|	2|	1.33|	1.33	NA	2	1
107	P34897	412	SHMT2	GLYM_HUMAN Serine hydroxymethyltransferase, mitochondrial OS=Homo sapiens OX=9606 GN=SHMT2 PE=1 SV=3	NTC(BTD[C])PGDR|NTC(BTD[C])PGDR	2|1	1.32|1.34	1.33	0.01414	3	2
108	Q2TAA2	47	IAH1	IAH1_HUMAN Isoamyl acetate-hydrolyzing esterase 1 homolog OS=Homo sapiens OX=9606 GN=IAH1 PE=1 SV=1	KC(BTD[C])DVLNR|KC(BTD[C])DVLNR	3|1	1.31|1.35	1.33	0.02828	4	2
109	P61289	133	PSME3	PSME3_HUMAN Proteasome activator complex subunit 3 OS=Homo sapiens OX=9606 GN=PSME3 PE=1 SV=1	LLIEKC(BTD[C])NTVK|	2|	1.33|	1.33	NA	2	1
110	P31327	816	CPS1	CPSM_HUMAN Carbamoyl-phosphate synthase [ammonia], mitochondrial OS=Homo sapiens OX=9606 GN=CPS1 PE=1 SV=2	MC(BTD[C])HPSIEGFTPR|	1|	1.33|	1.33	NA	1	1
111	P68402	35	PAFAH1B2	PA1B2_HUMAN Platelet-activating factor acetylhydrolase IB subunit beta OS=Homo sapiens OX=9606 GN=PAFAH1B2 PE=1 SV=1	FVLDC(BTD[C])K|FVLDC(BTD[C])K	1|1	1.35|1.31	1.33	0.02828	2	2
112	Q86VP6	940	CAND1	CAND1_HUMAN Cullin-associated NEDD8-dissociated protein 1 OS=Homo sapiens OX=9606 GN=CAND1 PE=1 SV=2	HC(BTD[C])ECAEEGTR|	1|	1.33|	1.33	NA	1	1
113	Q9NZM1	1131	MYOF	MYOF_HUMAN Myoferlin OS=Homo sapiens OX=9606 GN=MYOF PE=1 SV=1	|HSATTVFGANTPIVSC(BTD[C])NFDR	|1	|1.33	1.33	NA	1	1
114	Q9BTE3	325	MCMBP	MCMBP_HUMAN Mini-chromosome maintenance complex-binding protein OS=Homo sapiens OX=9606 GN=MCMBP PE=1 SV=2	|LQHINPLLPAC(BTD[C])LNK	|1	|1.33	1.33	NA	1	1
115	P11413	158	G6PD	G6PD_HUMAN Glucose-6-phosphate 1-dehydrogenase OS=Homo sapiens OX=9606 GN=G6PD PE=1 SV=4	NIHESC(BTD[C])MSQIGWNR|NIHESC(BTD[C])MSQIGWNR	1|1	1.55|1.1	1.325	0.3182	2	2
116	P78509	2763	RELN	RELN_HUMAN Reelin OS=Homo sapiens OX=9606 GN=RELN PE=1 SV=3	|ISVGC(BTD[C])K	|1	|1.32	1.32	NA	1	1
117	P14618	49	PKM	KPYM_HUMAN Pyruvate kinase PKM OS=Homo sapiens OX=9606 GN=PKM PE=1 SV=4	IC(BTD[C])TIGPASR IIC(BTD[C])TIGPASR NTGIIC(BTD[C])TIGPASR TGIIC(BTD[C])TIGPASR|IC(BTD[C])TIGPASR IIC(BTD[C])TIGPASR NTGIIC(BTD[C])TIGPASR TGIIC(BTD[C])TIGPASR	14|8	1.275|1.36	1.3175	0.0601	22	2
118	Q9NZB2	14	FAM120A	F120A_HUMAN Constitutive coactivator of PPAR-gamma-like protein 1 OS=Homo sapiens OX=9606 GN=FAM120A PE=1 SV=2	HC(BTD[C])PSAVVPVELQK|HC(BTD[C])PSAVVPVELQK	1|1	1.26|1.37	1.315	0.07778	2	2
119	O75884	39	RBBP9	RBBP9_HUMAN Putative hydrolase RBBP9 OS=Homo sapiens OX=9606 GN=RBBP9 PE=1 SV=2	IPGFQC(BTD[C])LAK|IPGFQC(BTD[C])LAK	2|1	1.26|1.37	1.315	0.07778	3	2
120	Q96DG6	198	CMBL	CMBL_HUMAN Carboxymethylenebutenolidase homolog OS=Homo sapiens OX=9606 GN=CMBL PE=1 SV=1	LKEHC(BTD[C])K|LKEHC(BTD[C])K	1|1	0.67|1.96	1.315	0.91217	2	2
121	P62249	25	RPS16	RS16_HUMAN 40S ribosomal protein S16 OS=Homo sapiens OX=9606 GN=RPS16 PE=1 SV=2	ATAVAHC(BTD[C])K TATAVAHC(BTD[C])K AVAHC(BTD[C])K|ATAVAHC(BTD[C])K AVAHC(BTD[C])K	5|3	1.07|1.55	1.31	0.33941	8	2
122	P38646	487	HSPA9	GRP75_HUMAN Stress-70 protein, mitochondrial OS=Homo sapiens OX=9606 GN=HSPA9 PE=1 SV=2	VC(BTD[C])QGER|	2|	1.31|	1.31	NA	2	1
123	P16152	150	CBR1	CBR1_HUMAN Carbonyl reductase [NADPH] 1 OS=Homo sapiens OX=9606 GN=CBR1 PE=1 SV=3	SC(BTD[C])SPELQQK|SC(BTD[C])SPELQQK	2|2	1.31|1.31	1.31	0	4	2
124	Q13347	144	EIF3I	EIF3I_HUMAN Eukaryotic translation initiation factor 3 subunit I OS=Homo sapiens OX=9606 GN=EIF3I PE=1 SV=1	|IPC(BTD[C])NDSK	|2	|1.31	1.31	NA	2	1
125	P06748	21	NPM1	NPM_HUMAN Nucleophosmin OS=Homo sapiens OX=9606 GN=NPM1 PE=1 SV=2	NYLFGC(BTD[C])ELK|RPQNYLFGC(BTD[C])ELK	1|2	1.11|1.5	1.305	0.27577	3	2
126	P07814	1480	EPRS	SYEP_HUMAN Bifunctional glutamate/proline--tRNA ligase OS=Homo sapiens OX=9606 GN=EPRS PE=1 SV=5	|SLC(BTD[C])IPFKPLCELQPGAK	|2	|1.305	1.305	NA	2	1
127	O75175	14	CNOT3	CNOT3_HUMAN CCR4-NOT transcription complex subunit 3 OS=Homo sapiens OX=9606 GN=CNOT3 PE=1 SV=1	LQGEIDRC(BTD[C])LK|	1|	1.3|	1.3	NA	1	1
128	Q99798	740	ACO2	ACON_HUMAN Aconitate hydratase, mitochondrial OS=Homo sapiens OX=9606 GN=ACO2 PE=1 SV=2	PLKC(BTD[C])IIK|	1|	1.3|	1.3	NA	1	1
129	P61978	145	HNRNPK	HNRPK_HUMAN Heterogeneous nuclear ribonucleoprotein K OS=Homo sapiens OX=9606 GN=HNRNPK PE=1 SV=1	FDC(BTD[C])ELR|	1|	1.3|	1.3	NA	1	1
130	P40926	89	MDH2	MDHM_HUMAN Malate dehydrogenase, mitochondrial OS=Homo sapiens OX=9606 GN=MDH2 PE=1 SV=3	|GYLGPEQLPDC(BTD[C])LK	|1	|1.3	1.3	NA	1	1
131	O95372	56	LYPLA2	LYPA2_HUMAN Acyl-protein thioesterase 2 OS=Homo sapiens OX=9606 GN=LYPLA2 PE=1 SV=1	IC(BTD[C])PHAPR|IC(BTD[C])PHAPR	2|4	1.34|1.24	1.29	0.07071	6	2
132	Q92841	431	DDX17	DDX17_HUMAN Probable ATP-dependent RNA helicase DDX17 OS=Homo sapiens OX=9606 GN=DDX17 PE=1 SV=2	RC(BTD[C])DDLTR|RRC(BTD[C])DDLTR	2|1	1.89|0.69	1.29	0.84853	3	2
133	P62937	62	PPIA	PPIA_HUMAN Peptidyl-prolyl cis-trans isomerase A OS=Homo sapiens OX=9606 GN=PPIA PE=1 SV=2	MC(BTD[C])QGGDFTR PGFMC(BTD[C])QGGDFTR IPGFMC(BTD[C])QGGDFTR IIPGFMC(BTD[C])QGGDFTR|MC(BTD[C])QGGDFTR FMC(BTD[C])QGGDFTR PGFMC(BTD[C])QGGDFTR IPGFMC(BTD[C])QGGDFTR	13|14	1.34|1.24	1.29	0.07071	27	2
134	P35579	816	MYH9	MYH9_HUMAN Myosin-9 OS=Homo sapiens OX=9606 GN=MYH9 PE=1 SV=4	NC(BTD[C])AAYLK|	1|	1.29|	1.29	NA	1	1
135	Q13228	31	SELENBP1	SBP1_HUMAN Methanethiol oxidase OS=Homo sapiens OX=9606 GN=SELENBP1 PE=1 SV=2	LPC(BTD[C])IYR|	2|	1.29|	1.29	NA	2	1
136	Q99832	370	CCT7	TCPH_HUMAN T-complex protein 1 subunit eta OS=Homo sapiens OX=9606 GN=CCT7 PE=1 SV=2	TC(BTD[C])TFILR|	1|	1.29|	1.29	NA	1	1
137	P31150	302	GDI1	GDIA_HUMAN Rab GDP dissociation inhibitor alpha OS=Homo sapiens OX=9606 GN=GDI1 PE=1 SV=2	|IIC(BTD[C])ILSHPIK	|1	|1.29	1.29	NA	1	1
138	P61981	112	YWHAG	1433G_HUMAN 14-3-3 protein gamma OS=Homo sapiens OX=9606 GN=YWHAG PE=1 SV=2	NC(BTD[C])SETQYESK|NC(BTD[C])SETQYESK	1|2	1.35|1.22	1.285	0.09192	3	2
139	P05198	98	EIF2S1	IF2A_HUMAN Eukaryotic translation initiation factor 2 subunit 1 OS=Homo sapiens OX=9606 GN=EIF2S1 PE=1 SV=3	VSPEEAIKC(BTD[C])EDK|VSPEEAIKC(BTD[C])EDK	1|1	1.41|1.16	1.285	0.17678	2	2
140	Q5VTU8	19	ATP5F1EP2	AT5EL_HUMAN ATP synthase subunit epsilon-like protein, mitochondrial OS=Homo sapiens OX=9606 GN=ATP5F1EP2 PE=1 SV=1	YSQIC(BTD[C])AK|YSQIC(BTD[C])AK	1|1	1.55|1.02	1.285	0.37477	2	2
141	Q99613	752	EIF3C	EIF3C_HUMAN Eukaryotic translation initiation factor 3 subunit C OS=Homo sapiens OX=9606 GN=EIF3C PE=1 SV=1	TC(BTD[C])HSFIINEK|TC(BTD[C])HSFIINEK	1|1	1.29|1.28	1.285	0.00707	2	2
142	P62701	181	RPS4X	RS4X_HUMAN 40S ribosomal protein S4, X isoform OS=Homo sapiens OX=9606 GN=RPS4X PE=1 SV=2	FDTGNLC(BTD[C])MVTGGANLGR|	2|	1.285|	1.285	NA	2	1
143	P17844	89	DDX5	DDX5_HUMAN Probable ATP-dependent RNA helicase DDX5 OS=Homo sapiens OX=9606 GN=DDX5 PE=1 SV=1	GHNC(BTD[C])PK|GHNC(BTD[C])PK	2|2	1.33|1.24	1.285	0.06364	4	2
144	Q9NUI1	53	DECR2	DECR2_HUMAN Peroxisomal 2,4-dienoyl-CoA reductase OS=Homo sapiens OX=9606 GN=DECR2 PE=1 SV=1	HGC(BTD[C])HTVIASR GC(BTD[C])HTVIASR|HGC(BTD[C])HTVIASR	5|2	1.26|1.3	1.28	0.02828	7	2
145	Q9NPE3	28	NOP10	NOP10_HUMAN H/ACA ribonucleoprotein complex subunit 3 OS=Homo sapiens OX=9606 GN=NOP10 PE=1 SV=1	FDPMGQQTC(BTD[C])SAHPAR|FDPMGQQTC(BTD[C])SAHPAR	1|1	1.48|1.08	1.28	0.28284	2	2
146	Q9Y3B4	74	SF3B6	SF3B6_HUMAN Splicing factor 3B subunit 6 OS=Homo sapiens OX=9606 GN=SF3B6 PE=1 SV=1	NAC(BTD[C])DHLSGFNVCNR|NAC(BTD[C])DHLSGFNVCNR	1|2	0.88|1.68	1.28	0.56569	3	2
147	Q00610	151	CLTC	CLH1_HUMAN Clathrin heavy chain 1 OS=Homo sapiens OX=9606 GN=CLTC PE=1 SV=5	HSSLAGC(BTD[C])QIINYR|	3|	1.28|	1.28	NA	3	1
148	P14923	457	JUP	PLAK_HUMAN Junction plakoglobin OS=Homo sapiens OX=9606 GN=JUP PE=1 SV=3	AGDKDDITEPAVC(BTD[C])ALR|	2|	1.28|	1.28	NA	2	1
149	Q96DG6	121	CMBL	CMBL_HUMAN Carboxymethylenebutenolidase homolog OS=Homo sapiens OX=9606 GN=CMBL PE=1 SV=1	QQC(BTD[C])HAQK|	1|	1.28|	1.28	NA	1	1
150	P21333	1997	FLNA	FLNA_HUMAN Filamin-A OS=Homo sapiens OX=9606 GN=FLNA PE=1 SV=4	|EEPC(BTD[C])LLK	|1	|1.28	1.28	NA	1	1
151	O60218	45	AKR1B10	AK1BA_HUMAN Aldo-keto reductase family 1 member B10 OS=Homo sapiens OX=9606 GN=AKR1B10 PE=1 SV=2	|HIDC(BTD[C])AYVYQNEHEVGEAIQEK DC(BTD[C])AYVYQNEHEVGEAIQEK	|4	|1.275	1.275	NA	4	1
152	P09382	43	LGALS1	LEG1_HUMAN Galectin-1 OS=Homo sapiens OX=9606 GN=LGALS1 PE=1 SV=2	NNLC(BTD[C])LHFNPR SNNLC(BTD[C])LHFNPR LC(BTD[C])LHFNPR NLC(BTD[C])LHFNPR DSNNLC(BTD[C])LHFNPR|SNNLC(BTD[C])LHFNPR NNLC(BTD[C])LHFNPR LC(BTD[C])LHFNPR DSNNLC(BTD[C])LHFNPR	8|8	1.23|1.315	1.2725	0.0601	16	2
153	P52948	188	NUP98	NUP98_HUMAN Nuclear pore complex protein Nup98-Nup96 OS=Homo sapiens OX=9606 GN=NUP98 PE=1 SV=4	HQC(BTD[C])ITAMK|	1|	1.27|	1.27	NA	1	1
154	Q15061	315	WDR43	WDR43_HUMAN WD repeat-containing protein 43 OS=Homo sapiens OX=9606 GN=WDR43 PE=1 SV=3	KPLTSNC(BTD[C])TIQIATPGK|	1|	1.27|	1.27	NA	1	1
155	P21333	2378	FLNA	FLNA_HUMAN Filamin-A OS=Homo sapiens OX=9606 GN=FLNA PE=1 SV=4	VHSPSGALEEC(BTD[C])YVTEIDQDK|	1|	1.27|	1.27	NA	1	1
156	Q14934	688	NFATC4	NFAC4_HUMAN Nuclear factor of activated T-cells, cytoplasmic 4 OS=Homo sapiens OX=9606 GN=NFATC4 PE=1 SV=2	FLPVIC(BTD[C])K|	1|	1.27|	1.27	NA	1	1
157	Q8TF46	723	DIS3L	DI3L1_HUMAN DIS3-like exonuclease 1 OS=Homo sapiens OX=9606 GN=DIS3L PE=1 SV=2	EC(BTD[C])AKAK|	1|	1.27|	1.27	NA	1	1
158	Q6UXN9	141	WDR82	WDR82_HUMAN WD repeat-containing protein 82 OS=Homo sapiens OX=9606 GN=WDR82 PE=1 SV=1	SPNC(BTD[C])QGLMHLQGK|SPNC(BTD[C])QGLMHLQGK	1|1	1.28|1.25	1.265	0.02121	2	2
159	O14880	56	MGST3	MGST3_HUMAN Microsomal glutathione S-transferase 3 OS=Homo sapiens OX=9606 GN=MGST3 PE=1 SV=1	STDPENGHIFNC(BTD[C])IQR|STDPENGHIFNC(BTD[C])IQR	1|2	1.22|1.31	1.265	0.06364	3	2
160	P46782	66	RPS5	RS5_HUMAN 40S ribosomal protein S5 OS=Homo sapiens OX=9606 GN=RPS5 PE=1 SV=4	KAQC(BTD[C])PIVER AQC(BTD[C])PIVER|KAQC(BTD[C])PIVER AQC(BTD[C])PIVER	6|5	1.11|1.41	1.26	0.21213	11	2
161	P40763	328	STAT3	STAT3_HUMAN Signal transducer and activator of transcription 3 OS=Homo sapiens OX=9606 GN=STAT3 PE=1 SV=2	QPC(BTD[C])MPMHPDRPLVIK|	1|	1.26|	1.26	NA	1	1
162	P49368	372	CCT3	TCPG_HUMAN T-complex protein 1 subunit gamma OS=Homo sapiens OX=9606 GN=CCT3 PE=1 SV=4	AC(BTD[C])TILLR|AC(BTD[C])TILLR	2|1	1.31|1.21	1.26	0.07071	3	2	Disulfide bond
163	O95372	171	LYPLA2	LYPA2_HUMAN Acyl-protein thioesterase 2 OS=Homo sapiens OX=9606 GN=LYPLA2 PE=1 SV=1	DLAILQC(BTD[C])HGELDPMVPVR|	1|	1.26|	1.26	NA	1	1
164	P60174	255	TPI1	TPIS_HUMAN Triosephosphate isomerase OS=Homo sapiens OX=9606 GN=TPI1 PE=1 SV=3	|IIYGGSVTGATC(BTD[C])K	|1	|1.26	1.26	NA	1	1
165	P23396	119	RPS3	RS3_HUMAN 40S ribosomal protein S3 OS=Homo sapiens OX=9606 GN=RPS3 PE=1 SV=2	|AC(BTD[C])YGVLR	|1	|1.26	1.26	NA	1	1
166	O00571	298	DDX3X	DDX3X_HUMAN ATP-dependent RNA helicase DDX3X OS=Homo sapiens OX=9606 GN=DDX3X PE=1 SV=3	|VRPC(BTD[C])VVYGGADIGQQIR	|2	|1.26	1.26	NA	2	1
167	P60981	46	DSTN	DEST_HUMAN Destrin OS=Homo sapiens OX=9606 GN=DSTN PE=1 SV=3	KC(BTD[C])IIVEEGK|KC(BTD[C])IIVEEGK	4|2	1.24|1.265	1.2525	0.01768	6	2
168	P49327	1759	FASN	FAS_HUMAN Fatty acid synthase OS=Homo sapiens OX=9606 GN=FASN PE=1 SV=3	C(BTD[C])LATHGR|C(BTD[C])LATHGR	3|3	1.27|1.23	1.25	0.02828	6	2
169	Q96EP5	63	DAZAP1	DAZP1_HUMAN DAZ-associated protein 1 OS=Homo sapiens OX=9606 GN=DAZAP1 PE=1 SV=1	FKDPNC(BTD[C])VGTVLASR|	3|	1.25|	1.25	NA	3	1
170	Q10567	123	AP1B1	AP1B1_HUMAN AP-1 complex subunit beta-1 OS=Homo sapiens OX=9606 GN=AP1B1 PE=1 SV=2	ITEYLC(BTD[C])EPLRK|	1|	1.25|	1.25	NA	1	1
171	P13995	145	MTHFD2	MTDC_HUMAN Bifunctional methylenetetrahydrofolate dehydrogenase/cyclohydrolase, mitochondrial OS=Homo sapiens OX=9606 GN=MTHFD2 PE=1 SV=2	IC(BTD[C])NAVSPDKDVDGFHVINVGR|	1|	1.25|	1.25	NA	1	1
172	Q9UBQ5	85	EIF3K	EIF3K_HUMAN Eukaryotic translation initiation factor 3 subunit K OS=Homo sapiens OX=9606 GN=EIF3K PE=1 SV=1	ALTNLPHTDFTLC(BTD[C])K|	1|	1.25|	1.25	NA	1	1
173	Q9UNS2	25	COPS3	CSN3_HUMAN COP9 signalosome complex subunit 3 OS=Homo sapiens OX=9606 GN=COPS3 PE=1 SV=3	QLSAQGQMTQLC(BTD[C])ELINK|	1|	1.25|	1.25	NA	1	1
174	Q14790	164	CASP8	CASP8_HUMAN Caspase-8 OS=Homo sapiens OX=9606 GN=CASP8 PE=1 SV=1	RVC(BTD[C])AQINK|RVC(BTD[C])AQINK	1|3	1.26|1.23	1.245	0.02121	4	2
175	Q96AE4	132	FUBP1	FUBP1_HUMAN Far upstream element-binding protein 1 OS=Homo sapiens OX=9606 GN=FUBP1 PE=1 SV=3	IQQESGC(BTD[C])K|	2|	1.24|	1.24	NA	2	1
176	O43264	404	ZW10	ZW10_HUMAN Centromere/kinetochore protein zw10 homolog OS=Homo sapiens OX=9606 GN=ZW10 PE=1 SV=3	KC(BTD[C])QDVIVAAR|	1|	1.24|	1.24	NA	1	1
177	P27708	280	CAD	PYR1_HUMAN CAD protein OS=Homo sapiens OX=9606 GN=CAD PE=1 SV=3	GHNQPC(BTD[C])LLVGSGR|GHNQPC(BTD[C])LLVGSGR	4|2	1.15|1.32	1.235	0.12021	6	2
178	P00352	186	ALDH1A1	AL1A1_HUMAN Retinal dehydrogenase 1 OS=Homo sapiens OX=9606 GN=ALDH1A1 PE=1 SV=2	IGPALSC(BTD[C])GNTVVVK|IGPALSC(BTD[C])GNTVVVK IGPALSC(BTD[C])GNTVVVKPAEQTPLTALHVASLIK	3|5	1.4|1.07	1.235	0.23335	8	2
179	P46060	152	RANGAP1	RAGP1_HUMAN Ran GTPase-activating protein 1 OS=Homo sapiens OX=9606 GN=RANGAP1 PE=1 SV=1	LNNC(BTD[C])GMGIGGGK|LNNC(BTD[C])GMGIGGGK	2|1	1.265|1.2	1.2325	0.04596	3	2
180	Q05639	326	EEF1A2	EF1A2_HUMAN Elongation factor 1-alpha 2 OS=Homo sapiens OX=9606 GN=EEF1A2 PE=1 SV=1	RGNVC(BTD[C])GDSK|	1|	1.23|	1.23	NA	1	1
181	Q5VW32	323	BROX	BROX_HUMAN BRO1 domain-containing protein BROX OS=Homo sapiens OX=9606 GN=BROX PE=1 SV=1	NTLEKC(BTD[C])QR|NTLEKC(BTD[C])QR	2|2	1.18|1.28	1.23	0.07071	4	2
182	Q12926	316	ELAVL2	ELAV2_HUMAN ELAV-like protein 2 OS=Homo sapiens OX=9606 GN=ELAVL2 PE=1 SV=2	DFNTNKC(BTD[C])K|	1|	1.23|	1.23	NA	1	1
183	Q92688	114	ANP32B	AN32B_HUMAN Acidic leucine-rich nuclear phosphoprotein 32 family member B OS=Homo sapiens OX=9606 GN=ANP32B PE=1 SV=1	KLEC(BTD[C])IK|	2|	1.23|	1.23	NA	2	1
184	Q00610	682	CLTC	CLH1_HUMAN Clathrin heavy chain 1 OS=Homo sapiens OX=9606 GN=CLTC PE=1 SV=5	QNLQIC(BTD[C])VQVASK|	2|	1.23|	1.23	NA	2	1
185	P20338	28	RAB4A	RAB4A_HUMAN Ras-related protein Rab-4A OS=Homo sapiens OX=9606 GN=RAB4A PE=1 SV=3	SC(BTD[C])LLHQFIEK|SC(BTD[C])LLHQFIEK	1|2	1.03|1.43	1.23	0.28284	3	2
186	Q9UDV6	287	ZNF212	ZN212_HUMAN Zinc finger protein 212 OS=Homo sapiens OX=9606 GN=ZNF212 PE=1 SV=3	TVGC(BTD[C])PK|	1|	1.23|	1.23	NA	1	1
187	P62851	59	RPS25	RS25_HUMAN 40S ribosomal protein S25 OS=Homo sapiens OX=9606 GN=RPS25 PE=1 SV=1	TYDKLC(BTD[C])K ATYDKLC(BTD[C])K|TYDKLC(BTD[C])K ATYDKLC(BTD[C])K	2|3	1.195|1.26	1.2275	0.04596	5	2
188	P49773	84	HINT1	HINT1_HUMAN Histidine triad nucleotide-binding protein 1 OS=Homo sapiens OX=9606 GN=HINT1 PE=1 SV=2	KC(BTD[C])AADLGLNK|KC(BTD[C])AADLGLNK	4|4	1.225|1.225	1.225	0	8	2
189	P48643	493	CCT5	TCPE_HUMAN T-complex protein 1 subunit epsilon OS=Homo sapiens OX=9606 GN=CCT5 PE=1 SV=1	EMNPALGIDC(BTD[C])LHK|	2|	1.225|	1.225	NA	2	1
190	P52272	114	HNRNPM	HNRPM_HUMAN Heterogeneous nuclear ribonucleoprotein M OS=Homo sapiens OX=9606 GN=HNRNPM PE=1 SV=3	GC(BTD[C])AVVEFK|GC(BTD[C])AVVEFK	2|2	1.12|1.33	1.225	0.14849	4	2
191	Q96AG4	59	LRRC59	LRC59_HUMAN Leucine-rich repeat-containing protein 59 OS=Homo sapiens OX=9606 GN=LRRC59 PE=1 SV=1	LPSDFC(BTD[C])GLTHLVK TTLPSDFC(BTD[C])GLTHLVK TLPSDFC(BTD[C])GLTHLVK LTTLPSDFC(BTD[C])GLTHLVK|LPSDFC(BTD[C])GLTHLVK TLPSDFC(BTD[C])GLTHLVK TTLPSDFC(BTD[C])GLTHLVK	7|4	1.26|1.19	1.225	0.0495	11	2
192	O00560	239	SDCBP	SDCB1_HUMAN Syntenin-1 OS=Homo sapiens OX=9606 GN=SDCBP PE=1 SV=1	|NGLLTEHNIC(BTD[C])EINGQNVIGLK	|2	|1.225	1.225	NA	2	1
193	P00558	99	PGK1	PGK1_HUMAN Phosphoglycerate kinase 1 OS=Homo sapiens OX=9606 GN=PGK1 PE=1 SV=3	DC(BTD[C])VGPEVEK DVLFLKDC(BTD[C])VGPEVEK|DC(BTD[C])VGPEVEK	4|1	1.295|1.15	1.2225	0.10253	5	2
194	P17844	354	DDX5	DDX5_HUMAN Probable ATP-dependent RNA helicase DDX5 OS=Homo sapiens OX=9606 GN=DDX5 PE=1 SV=1	RC(BTD[C])DELTR|RRC(BTD[C])DELTR RC(BTD[C])DELTR	1|6	1.31|1.13	1.22	0.12728	7	2
195	Q13098	251	GPS1	CSN1_HUMAN COP9 signalosome complex subunit 1 OS=Homo sapiens OX=9606 GN=GPS1 PE=1 SV=4	LKC(BTD[C])AAGLAELAAR|LKC(BTD[C])AAGLAELAAR	4|2	1.205|1.235	1.22	0.02121	6	2
196	P30838	428	ALDH3A1	AL3A1_HUMAN Aldehyde dehydrogenase, dimeric NADP-preferring OS=Homo sapiens OX=9606 GN=ALDH3A1 PE=1 SV=3	SC(BTD[C])LVRPLMNDEGLK|	1|	1.22|	1.22	NA	1	1
197	P17812	362	CTPS1	PYRG1_HUMAN CTP synthase 1 OS=Homo sapiens OX=9606 GN=CTPS1 PE=1 SV=2	|LC(BTD[C])SAHGVLVPGGFGVR	|2	|1.22	1.22	NA	2	1
198	P49792	2982	RANBP2	RBP2_HUMAN E3 SUMO-protein ligase RanBP2 OS=Homo sapiens OX=9606 GN=RANBP2 PE=1 SV=2	VC(BTD[C])ANHVITK|VC(BTD[C])ANHVITK	1|2	1.14|1.295	1.2175	0.1096	3	2
199	Q9ULV4	343	CORO1C	COR1C_HUMAN Coronin-1C OS=Homo sapiens OX=9606 GN=CORO1C PE=1 SV=1	KC(BTD[C])EPIIMTVPR|KC(BTD[C])EPIIMTVPR	5|2	0.98|1.455	1.2175	0.33588	7	2
200	P07858	59	CTSB	CATB_HUMAN Cathepsin B OS=Homo sapiens OX=9606 GN=CTSB PE=1 SV=3	LC(BTD[C])GTFLGGPKPPQR|LC(BTD[C])GTFLGGPKPPQR	2|2	1.18|1.25	1.215	0.0495	4	2
201	P11142	574	HSPA8	HSP7C_HUMAN Heat shock cognate 71 kDa protein OS=Homo sapiens OX=9606 GN=HSPA8 PE=1 SV=1	ILDKC(BTD[C])NEIINWLDK|ILDKC(BTD[C])NEIINWLDK	2|2	0.89|1.54	1.215	0.45962	4	2
202	Q01813	718	PFKP	PFKAP_HUMAN ATP-dependent 6-phosphofructokinase, platelet type OS=Homo sapiens OX=9606 GN=PFKP PE=1 SV=2	FTTDDSIC(BTD[C])VLGISK|FTTDDSIC(BTD[C])VLGISK	2|1	1.21|1.22	1.215	0.00707	3	2
203	P62241	182	RPS8	RS8_HUMAN 40S ribosomal protein S8 OS=Homo sapiens OX=9606 GN=RPS8 PE=1 SV=2	PGQC(BTD[C])GR|	1|	1.21|	1.21	NA	1	1
204	Q13813	1622	SPTAN1	SPTN1_HUMAN Spectrin alpha chain, non-erythrocytic 1 OS=Homo sapiens OX=9606 GN=SPTAN1 PE=1 SV=3	GAC(BTD[C])AGSEDAVK|	2|	1.21|	1.21	NA	2	1
205	P24390	29	KDELR1	ERD21_HUMAN ER lumen protein-retaining receptor 1 OS=Homo sapiens OX=9606 GN=KDELR1 PE=1 SV=1	SC(BTD[C])AGISGK|	1|	1.21|	1.21	NA	1	1
206	P50993	660	ATP1A2	AT1A2_HUMAN Sodium/potassium-transporting ATPase subunit alpha-2 OS=Homo sapiens OX=9606 GN=ATP1A2 PE=1 SV=1	AC(BTD[C])VVHGSDLK|	4|	1.21|	1.21	NA	4	1
207	Q9UKF6	223	CPSF3	CPSF3_HUMAN Cleavage and polyadenylation specificity factor subunit 3 OS=Homo sapiens OX=9606 GN=CPSF3 PE=1 SV=1	FC(BTD[C])NTVHDIVNR|FC(BTD[C])NTVHDIVNR	2|3	1.26|1.16	1.21	0.07071	5	2
208	P07738	145	BPGM	PMGE_HUMAN Bisphosphoglycerate mutase OS=Homo sapiens OX=9606 GN=BPGM PE=1 SV=2	YKVC(BTD[C])DVPLDQLPR|	1|	1.21|	1.21	NA	1	1
209	P04406	156	GAPDH	G3P_HUMAN Glyceraldehyde-3-phosphate dehydrogenase OS=Homo sapiens OX=9606 GN=GAPDH PE=1 SV=3	IISNASCTTNC(BTD[C])LAPLAK|IISNASCTTNC(BTD[C])LAPLAK	2|2	1.23|1.19	1.21	0.02828	4	2
210	Q16881	214	TXNRD1	TRXR1_HUMAN Thioredoxin reductase 1, cytoplasmic OS=Homo sapiens OX=9606 GN=TXNRD1 PE=1 SV=3	WGLGGTCVNVGC(BTD[C])IPK|WGLGGTCVNVGC(BTD[C])IPK	2|1	1.07|1.35	1.21	0.19799	3	2	Disulfide bond
211	P63244	249	RACK1	RACK1_HUMAN Receptor of activated protein C kinase 1 OS=Homo sapiens OX=9606 GN=RACK1 PE=1 SV=3	YWLC(BTD[C])AATGPSIK|	1|	1.21|	1.21	NA	1	1
212	Q9Y3E7	60	CHMP3	CHMP3_HUMAN Charged multivesicular body protein 3 OS=Homo sapiens OX=9606 GN=CHMP3 PE=1 SV=3	|VC(BTD[C])IVLAK	|1	|1.21	1.21	NA	1	1
213	P21980	269	TGM2	TGM2_HUMAN Protein-glutamine gamma-glutamyltransferase 2 OS=Homo sapiens OX=9606 GN=TGM2 PE=1 SV=2	|NHGC(BTD[C])QR	|1	|1.21	1.21	NA	1	1
214	Q9UKD2	33	MRTO4	MRT4_HUMAN mRNA turnover protein 4 homolog OS=Homo sapiens OX=9606 GN=MRTO4 PE=1 SV=2	KC(BTD[C])VDTYK|KC(BTD[C])VDTYK	4|3	1.25|1.16	1.205	0.06364	7	2
215	P82933	330	MRPS9	RT09_HUMAN 28S ribosomal protein S9, mitochondrial OS=Homo sapiens OX=9606 GN=MRPS9 PE=1 SV=2	HDVTC(BTD[C])TVSGGGR|HDVTC(BTD[C])TVSGGGR	1|2	1.03|1.38	1.205	0.24749	3	2
216	P04406	247	GAPDH	G3P_HUMAN Glyceraldehyde-3-phosphate dehydrogenase OS=Homo sapiens OX=9606 GN=GAPDH PE=1 SV=3	VPTANVSVVDLTC(BTD[C])R|VPTANVSVVDLTC(BTD[C])R	4|1	1.23|1.18	1.205	0.03536	5	2
217	P00491	78	PNP	PNPH_HUMAN Purine nucleoside phosphorylase OS=Homo sapiens OX=9606 GN=PNP PE=1 SV=2	AC(BTD[C])VMMQGR|AC(BTD[C])VMMQGR	10|7	1.17|1.23	1.2	0.04243	17	2
218	Q9H0C8	312	ILKAP	ILKAP_HUMAN Integrin-linked kinase-associated serine/threonine phosphatase 2C OS=Homo sapiens OX=9606 GN=ILKAP PE=1 SV=1	RC(BTD[C])QLTPNDR|RC(BTD[C])QLTPNDR	1|1	1.22|1.18	1.2	0.02828	2	2
219	P38646	366	HSPA9	GRP75_HUMAN Stress-70 protein, mitochondrial OS=Homo sapiens OX=9606 GN=HSPA9 PE=1 SV=2	TIAPC(BTD[C])QK|	2|	1.2|	1.2	NA	2	1
220	P11908	284	PRPS2	PRPS2_HUMAN Ribose-phosphate pyrophosphokinase 2 OS=Homo sapiens OX=9606 GN=PRPS2 PE=1 SV=2	MKHC(BTD[C])TK|	2|	1.2|	1.2	NA	2	1
221	Q6PKG0	60	LARP1	LARP1_HUMAN La-related protein 1 OS=Homo sapiens OX=9606 GN=LARP1 PE=1 SV=2	|PRPPC(BTD[C])AK	|1	|1.2	1.2	NA	1	1
222	P50991	379	CCT4	TCPD_HUMAN T-complex protein 1 subunit delta OS=Homo sapiens OX=9606 GN=CCT4 PE=1 SV=4	|ITGC(BTD[C])ASPGK	|1	|1.2	1.2	NA	1	1
223	Q13619	483	CUL4A	CUL4A_HUMAN Cullin-4A OS=Homo sapiens OX=9606 GN=CUL4A PE=1 SV=3	LKHEC(BTD[C])GAAFTSK HEC(BTD[C])GAAFTSK|HEC(BTD[C])GAAFTSK	4|2	1.22|1.175	1.1975	0.03182	6	2
224	P04040	460	CAT	CATA_HUMAN Catalase OS=Homo sapiens OX=9606 GN=CAT PE=1 SV=3	RLC(BTD[C])ENIAGHLK LC(BTD[C])ENIAGHLK|RLC(BTD[C])ENIAGHLK LC(BTD[C])ENIAGHLK	13|16	1.22|1.175	1.1975	0.03182	29	2
225	P35579	931	MYH9	MYH9_HUMAN Myosin-9 OS=Homo sapiens OX=9606 GN=MYH9 PE=1 SV=4	VEEEEERC(BTD[C])QHLQAEK|VEEEEERC(BTD[C])QHLQAEK	1|2	1.25|1.14	1.195	0.07778	3	2
226	P26368	464	U2AF2	U2AF2_HUMAN Splicing factor U2AF 65 kDa subunit OS=Homo sapiens OX=9606 GN=U2AF2 PE=1 SV=4	YC(BTD[C])DPDSYHR|YC(BTD[C])DPDSYHR	4|1	0.945|1.44	1.1925	0.35002	5	2
227	Q9NZM1	1402	MYOF	MYOF_HUMAN Myoferlin OS=Homo sapiens OX=9606 GN=MYOF PE=1 SV=1	FRC(BTD[C])DPYAGK|FRC(BTD[C])DPYAGK	3|4	1.2|1.185	1.1925	0.01061	7	2
228	P56537	63	EIF6	IF6_HUMAN Eukaryotic translation initiation factor 6 OS=Homo sapiens OX=9606 GN=EIF6 PE=1 SV=1	MC(BTD[C])VGNR|	1|	1.19|	1.19	NA	1	1
229	Q6ZW61	426	BBS12	BBS12_HUMAN Bardet-Biedl syndrome 12 protein OS=Homo sapiens OX=9606 GN=BBS12 PE=1 SV=2	LIEKC(BTD[C])INSK|	3|	1.19|	1.19	NA	3	1
230	P43034	252	PAFAH1B1	LIS1_HUMAN Platelet-activating factor acetylhydrolase IB subunit alpha OS=Homo sapiens OX=9606 GN=PAFAH1B1 PE=1 SV=2	MVRPNQDGTLIASC(BTD[C])SNDQTVR|	3|	1.19|	1.19	NA	3	1
231	O15067	512	PFAS	PUR4_HUMAN Phosphoribosylformylglycinamidine synthase OS=Homo sapiens OX=9606 GN=PFAS PE=1 SV=4	GNPIC(BTD[C])SLHDQGAGGNGNVLK|	1|	1.19|	1.19	NA	1	1
232	P14174	57	MIF	MIF_HUMAN Macrophage migration inhibitory factor OS=Homo sapiens OX=9606 GN=MIF PE=1 SV=4	GGSSEPC(BTD[C])ALCSLHSIGK|	1|	1.19|	1.19	NA	1	1
233	P09110	381	ACAA1	THIK_HUMAN 3-ketoacyl-CoA thiolase, peroxisomal OS=Homo sapiens OX=9606 GN=ACAA1 PE=1 SV=2	VNPLGGAVALGHPLGC(BTD[C])TGAR|VNPLGGAVALGHPLGC(BTD[C])TGAR	4|1	1.34|1.04	1.19	0.21213	5	2
234	Q9BXJ9	508	NAA15	NAA15_HUMAN N-alpha-acetyltransferase 15, NatA auxiliary subunit OS=Homo sapiens OX=9606 GN=NAA15 PE=1 SV=1	KC(BTD[C])HEIER|	2|	1.19|	1.19	NA	2	1
235	P09496	218	CLTA	CLCA_HUMAN Clathrin light chain A OS=Homo sapiens OX=9606 GN=CLTA PE=1 SV=1	|LC(BTD[C])DFNPK	|1	|1.19	1.19	NA	1	1
236	P35579	569	MYH9	MYH9_HUMAN Myosin-9 OS=Homo sapiens OX=9606 GN=MYH9 PE=1 SV=4	ADFC(BTD[C])IIHYAGK|ADFC(BTD[C])IIHYAGK	3|2	1.16|1.21	1.185	0.03536	5	2
237	Q9NZM1	1919	MYOF	MYOF_HUMAN Myoferlin OS=Homo sapiens OX=9606 GN=MYOF PE=1 SV=1	SPEKC(BTD[C])R|SPEKC(BTD[C])R	4|2	1.28|1.085	1.1825	0.13789	6	2
238	P63208	160	SKP1	SKP1_HUMAN S-phase kinase-associated protein 1 OS=Homo sapiens OX=9606 GN=SKP1 PE=1 SV=2	KENQWC(BTD[C])EEK|	2|	1.18|	1.18	NA	2	1
239	Q02790	103	FKBP4	FKBP4_HUMAN Peptidyl-prolyl cis-trans isomerase FKBP4 OS=Homo sapiens OX=9606 GN=FKBP4 PE=1 SV=3	VGEVC(BTD[C])HITCKPEYAYGSAGSPPK|VGEVC(BTD[C])HITCKPEYAYGSAGSPPK	1|1	1.3|1.06	1.18	0.16971	2	2
240	P15121	81	AKR1B1	ALDR_HUMAN Aldo-keto reductase family 1 member B1 OS=Homo sapiens OX=9606 GN=AKR1B1 PE=1 SV=3	LWC(BTD[C])TYHEK|LWC(BTD[C])TYHEK	3|1	1.14|1.22	1.18	0.05657	4	2
241	O00425	194	IGF2BP3	IF2B3_HUMAN Insulin-like growth factor 2 mRNA-binding protein 3 OS=Homo sapiens OX=9606 GN=IGF2BP3 PE=1 SV=2	QKPC(BTD[C])DLPLR|	1|	1.18|	1.18	NA	1	1
242	P17655	640	CAPN2	CAN2_HUMAN Calpain-2 catalytic subunit OS=Homo sapiens OX=9606 GN=CAPN2 PE=1 SV=6	MPC(BTD[C])QLHQVIVAR|MPC(BTD[C])QLHQVIVAR	2|3	1.24|1.12	1.18	0.08485	5	2
243	P07384	49	CAPN1	CAN1_HUMAN Calpain-1 catalytic subunit OS=Homo sapiens OX=9606 GN=CAPN1 PE=1 SV=1	RC(BTD[C])LQSGTLFR|	1|	1.18|	1.18	NA	1	1
244	P55072	535	VCP	TERA_HUMAN Transitional endoplasmic reticulum ATPase OS=Homo sapiens OX=9606 GN=VCP PE=1 SV=4	AIANEC(BTD[C])QANFISIK|	3|	1.18|	1.18	NA	3	1
245	P11802	215	CDK4	CDK4_HUMAN Cyclin-dependent kinase 4 OS=Homo sapiens OX=9606 GN=CDK4 PE=1 SV=2	|KPLFC(BTD[C])GNSEADQLGK	|2	|1.18	1.18	NA	2	1
246	Q2TAY7	416	SMU1	SMU1_HUMAN WD40 repeat-containing protein SMU1 OS=Homo sapiens OX=9606 GN=SMU1 PE=1 SV=2	NPEHFVVC(BTD[C])NR|NPEHFVVC(BTD[C])NR	2|1	1.175|1.18	1.1775	0.00354	3	2
247	P53618	143	COPB1	COPB_HUMAN Coatomer subunit beta OS=Homo sapiens OX=9606 GN=COPB1 PE=1 SV=3	AC(BTD[C])LEHR|AC(BTD[C])LEHR	1|3	1.14|1.21	1.175	0.0495	4	2
248	Q13501	44	SQSTM1	SQSTM_HUMAN Sequestosome-1 OS=Homo sapiens OX=9606 GN=SQSTM1 PE=1 SV=1	GPGPC(BTD[C])ER|SPEPEAEAEAAAGPGPC(BTD[C])ER	1|1	1.47|0.88	1.175	0.41719	2	2
249	P43243	821	MATR3	MATR3_HUMAN Matrin-3 OS=Homo sapiens OX=9606 GN=MATR3 PE=1 SV=2	NTHC(BTD[C])SSLPHYQK|NTHC(BTD[C])SSLPHYQK	2|2	1.1|1.24	1.17	0.09899	4	2
250	Q92979	171	EMG1	NEP1_HUMAN Ribosomal RNA small subunit methyltransferase NEP1 OS=Homo sapiens OX=9606 GN=EMG1 PE=1 SV=4	NPVSDHFPVGC(BTD[C])MK|NPVSDHFPVGC(BTD[C])MK	2|2	1.09|1.25	1.17	0.11314	4	2
251	P00390	107	GSR	GSHR_HUMAN Glutathione reductase, mitochondrial OS=Homo sapiens OX=9606 GN=GSR PE=1 SV=2	LGGTCVNVGC(BTD[C])VPK|LGGTCVNVGC(BTD[C])VPK	1|3	0.96|1.38	1.17	0.29698	4	2	Disulfide bond
252	Q5H9R7	467	PPP6R3	PP6R3_HUMAN Serine/threonine-protein phosphatase 6 regulatory subunit 3 OS=Homo sapiens OX=9606 GN=PPP6R3 PE=1 SV=2	|IANC(BTD[C])IVHSTDK	|1	|1.17	1.17	NA	1	1
253	Q13867	164	BLMH	BLMH_HUMAN Bleomycin hydrolase OS=Homo sapiens OX=9606 GN=BLMH PE=1 SV=1	KC(BTD[C])FPESYTTEATR|KC(BTD[C])FPESYTTEATR	4|4	1.13|1.2	1.165	0.0495	8	2
254	P11216	373	PYGB	PYGB_HUMAN Glycogen phosphorylase, brain form OS=Homo sapiens OX=9606 GN=PYGB PE=1 SV=5	TC(BTD[C])AYTNHTVLPEALER|TC(BTD[C])AYTNHTVLPEALER	2|1	1.15|1.18	1.165	0.02121	3	2
255	P17980	121	PSMC3	PRS6A_HUMAN 26S proteasome regulatory subunit 6A OS=Homo sapiens OX=9606 GN=PSMC3 PE=1 SV=3	|GKC(BTD[C])AVIK	|4	|1.165	1.165	NA	4	1
256	O75369	2154	FLNB	FLNB_HUMAN Filamin-B OS=Homo sapiens OX=9606 GN=FLNB PE=1 SV=2	NSHC(BTD[C])VR|NSHC(BTD[C])VR	2|2	1.22|1.1	1.16	0.08485	4	2
257	P62495	335	ETF1	ERF1_HUMAN Eukaryotic peptide chain release factor subunit 1 OS=Homo sapiens OX=9606 GN=ETF1 PE=1 SV=3	YVLHC(BTD[C])QGTEEEK|	1|	1.16|	1.16	NA	1	1
258	Q04828	87	AKR1C1	AK1C1_HUMAN Aldo-keto reductase family 1 member C1 OS=Homo sapiens OX=9606 GN=AKR1C1 PE=1 SV=1	LWC(BTD[C])NSHRPELVR|LWC(BTD[C])NSHRPELVR	2|1	1.14|1.18	1.16	0.02828	3	2
259	P13639	41	EEF2	EF2_HUMAN Elongation factor 2 OS=Homo sapiens OX=9606 GN=EEF2 PE=1 SV=4	LTDSLVC(BTD[C])K|	1|	1.16|	1.16	NA	1	1
260	P61247	201	RPS3A	RS3A_HUMAN 40S ribosomal protein S3a OS=Homo sapiens OX=9606 GN=RPS3A PE=1 SV=2	AC(BTD[C])QSIYPLHDVFVR|AC(BTD[C])QSIYPLHDVFVR	1|4	0.99|1.33	1.16	0.24042	5	2
261	Q9Y678	325	COPG1	COPG1_HUMAN Coatomer subunit gamma-1 OS=Homo sapiens OX=9606 GN=COPG1 PE=1 SV=1	HPSAVTAC(BTD[C])NLDLENLVTDSNR|	1|	1.16|	1.16	NA	1	1
262	O00571	317	DDX3X	DDX3X_HUMAN ATP-dependent RNA helicase DDX3X OS=Homo sapiens OX=9606 GN=DDX3X PE=1 SV=3	|GC(BTD[C])HLLVATPGR	|2	|1.16	1.16	NA	2	1
263	P13639	591	EEF2	EF2_HUMAN Elongation factor 2 OS=Homo sapiens OX=9606 GN=EEF2 PE=1 SV=4	|ETVSEESNVLC(BTD[C])LSK	|3	|1.16	1.16	NA	3	1
264	P62273	39	RPS29	RS29_HUMAN 40S ribosomal protein S29 OS=Homo sapiens OX=9606 GN=RPS29 PE=1 SV=2	YGLNMC(BTD[C])R|YGLNMC(BTD[C])R	2|3	1.125|1.19	1.1575	0.04596	5	2	Metal binding
265	Q8TEX9	782	IPO4	IPO4_HUMAN Importin-4 OS=Homo sapiens OX=9606 GN=IPO4 PE=1 SV=2	SC(BTD[C])GTLTLKPPGR|SC(BTD[C])GTLTLKPPGR	2|2	1.035|1.28	1.1575	0.17324	4	2
266	P32969	74	RPL9	RL9_HUMAN 60S ribosomal protein L9 OS=Homo sapiens OX=9606 GN=RPL9 PE=1 SV=1	TIC(BTD[C])SHVQNMIK|TIC(BTD[C])SHVQNMIK	8|2	1.17|1.14	1.155	0.02121	10	2
267	P36542	103	ATP5F1C	ATPG_HUMAN ATP synthase subunit gamma, mitochondrial OS=Homo sapiens OX=9606 GN=ATP5F1C PE=1 SV=1	GLC(BTD[C])GAIHSSIAK|GLC(BTD[C])GAIHSSIAK	1|4	1.16|1.15	1.155	0.00707	5	2
268	O95782	225	AP2A1	AP2A1_HUMAN AP-2 complex subunit alpha-1 OS=Homo sapiens OX=9606 GN=AP2A1 PE=1 SV=3	TC(BTD[C])VSLAVSR|	2|	1.155|	1.155	NA	2	1
269	P56537	152	EIF6	IF6_HUMAN Eukaryotic translation initiation factor 6 OS=Homo sapiens OX=9606 GN=EIF6 PE=1 SV=1	QTVADQVLVGSYC(BTD[C])VFSNQGGLVHPK|QTVADQVLVGSYC(BTD[C])VFSNQGGLVHPK	1|2	1.33|0.98	1.155	0.24749	3	2
270	Q6UXN9	287	WDR82	WDR82_HUMAN WD repeat-containing protein 82 OS=Homo sapiens OX=9606 GN=WDR82 PE=1 SV=1	|HTGPITC(BTD[C])LQFNPK	|2	|1.155	1.155	NA	2	1
271	Q07812	62	BAX	BAX_HUMAN Apoptosis regulator BAX OS=Homo sapiens OX=9606 GN=BAX PE=1 SV=1	LSEC(BTD[C])LKR|LSEC(BTD[C])LKR	2|2	1.135|1.17	1.1525	0.02475	4	2
272	P60981	135	DSTN	DEST_HUMAN Destrin OS=Homo sapiens OX=9606 GN=DSTN PE=1 SV=3	HEC(BTD[C])QANGPEDLNR|HEC(BTD[C])QANGPEDLNR	2|4	1.36|0.94	1.15	0.29698	6	2
273	O43175	281	PHGDH	SERA_HUMAN D-3-phosphoglycerate dehydrogenase OS=Homo sapiens OX=9606 GN=PHGDH PE=1 SV=4	ALVDHENVISC(BTD[C])PHLGASTK|	1|	1.15|	1.15	NA	1	1
274	O15067	584	PFAS	PUR4_HUMAN Phosphoribosylformylglycinamidine synthase OS=Homo sapiens OX=9606 GN=PFAS PE=1 SV=4	ERC(BTD[C])PACFVGTITGDR|ERC(BTD[C])PACFVGTITGDR	1|2	0.96|1.34	1.15	0.2687	3	2
275	P78347	745	GTF2I	GTF2I_HUMAN General transcription factor II-I OS=Homo sapiens OX=9606 GN=GTF2I PE=1 SV=2	VENLFNEKC(BTD[C])GEALGLK|	1|	1.15|	1.15	NA	1	1
276	Q9H628	128	RERGL	RERGL_HUMAN Ras-related and estrogen-regulated growth inhibitor-like protein OS=Homo sapiens OX=9606 GN=RERGL PE=2 SV=1	|DLC(BTD[C])HVR	|1	|1.15	1.15	NA	1	1
277	P14174	60	MIF	MIF_HUMAN Macrophage migration inhibitory factor OS=Homo sapiens OX=9606 GN=MIF PE=1 SV=4	LC(BTD[C])SLHSIGK GGSSEPCALC(BTD[C])SLHSIGK|LC(BTD[C])SLHSIGK	2|1	1.07|1.22	1.145	0.10607	3	2
278	P46777	76	RPL5	RL5_HUMAN 60S ribosomal protein L5 OS=Homo sapiens OX=9606 GN=RPL5 PE=1 SV=3	IEGDMIVC(BTD[C])AAYAHELPK|IEGDMIVC(BTD[C])AAYAHELPK	2|3	1.11|1.18	1.145	0.0495	5	2
279	O75369	1952	FLNB	FLNB_HUMAN Filamin-B OS=Homo sapiens OX=9606 GN=FLNB PE=1 SV=2	DEPC(BTD[C])LLK|DEPC(BTD[C])LLK	1|2	1.01|1.28	1.145	0.19092	3	2
280	Q8N8S7	62	ENAH	ENAH_HUMAN Protein enabled homolog OS=Homo sapiens OX=9606 GN=ENAH PE=1 SV=2	|IQDHQVVINC(BTD[C])AIPK	|2	|1.145	1.145	NA	2	1
281	P83111	154	LACTB	LACTB_HUMAN Serine beta-lactamase-like protein LACTB, mitochondrial OS=Homo sapiens OX=9606 GN=LACTB PE=1 SV=2	VPC(BTD[C])KPETVMR|VPC(BTD[C])KPETVMR	4|4	1.2|1.085	1.1425	0.08132	8	2
282	P32969	134	RPL9	RL9_HUMAN 60S ribosomal protein L9 OS=Homo sapiens OX=9606 GN=RPL9 PE=1 SV=1	MRPGVAC(BTD[C])SVSQAQK|MRPGVAC(BTD[C])SVSQAQK	6|9	1.145|1.14	1.1425	0.00354	15	2
283	Q16630	466	CPSF6	CPSF6_HUMAN Cleavage and polyadenylation specificity factor subunit 6 OS=Homo sapiens OX=9606 GN=CPSF6 PE=1 SV=2	VSADDRC(BTD[C])K|VSADDRC(BTD[C])K	4|2	1.065|1.215	1.14	0.10607	6	2
284	P34932	270	HSPA4	HSP74_HUMAN Heat shock 70 kDa protein 4 OS=Homo sapiens OX=9606 GN=HSPA4 PE=1 SV=4	LSQEC(BTD[C])EK|	1|	1.14|	1.14	NA	1	1
285	P09936	132	UCHL1	UCHL1_HUMAN Ubiquitin carboxyl-terminal hydrolase isozyme L1 OS=Homo sapiens OX=9606 GN=UCHL1 PE=1 SV=2	AKC(BTD[C])FEK|AKC(BTD[C])FEK	1|4	1.15|1.13	1.14	0.01414	5	2
286	Q9NZM1	1392	MYOF	MYOF_HUMAN Myoferlin OS=Homo sapiens OX=9606 GN=MYOF PE=1 SV=1	KPVVGQC(BTD[C])TIER|	3|	1.14|	1.14	NA	3	1
287	O00273	47	DFFA	DFFA_HUMAN DNA fragmentation factor subunit alpha OS=Homo sapiens OX=9606 GN=DFFA PE=1 SV=1	KAC(BTD[C])DILAIDK|	1|	1.14|	1.14	NA	1	1
288	P30050	162	RPL12	RL12_HUMAN 60S ribosomal protein L12 OS=Homo sapiens OX=9606 GN=RPL12 PE=1 SV=1	HPHDIIDDINSGAVEC(BTD[C])PAS|HPHDIIDDINSGAVEC(BTD[C])PAS	2|1	1.32|0.96	1.14	0.25456	3	2
289	P29401	133	TKT	TKT_HUMAN Transketolase OS=Homo sapiens OX=9606 GN=TKT PE=1 SV=3	QAFTDVATGSLGQGLGAAC(BTD[C])GMAYTGK|	1|	1.14|	1.14	NA	1	1
290	P22234	266	PAICS	PUR6_HUMAN Multifunctional protein ADE2 OS=Homo sapiens OX=9606 GN=PAICS PE=1 SV=3	|SESQC(BTD[C])R	|1	|1.14	1.14	NA	1	1
291	P07099	80	EPHX1	HYEP_HUMAN Epoxide hydrolase 1 OS=Homo sapiens OX=9606 GN=EPHX1 PE=1 SV=1	|FTPPLEDSC(BTD[C])FHYGFNSNYLK	|1	|1.14	1.14	NA	1	1
292	P48506	142	GCLC	GSH1_HUMAN Glutamate--cysteine ligase catalytic subunit OS=Homo sapiens OX=9606 GN=GCLC PE=1 SV=2	|EATSILEENQALC(BTD[C])TITSFPR	|1	|1.14	1.14	NA	1	1
293	P62857	27	RPS28	RS28_HUMAN 40S ribosomal protein S28 OS=Homo sapiens OX=9606 GN=RPS28 PE=1 SV=1	TGSQGQC(BTD[C])TQVR|GSQGQC(BTD[C])TQVR SQGQC(BTD[C])TQVR QGQC(BTD[C])TQVR TGSQGQC(BTD[C])TQVR	1|6	1.15|1.125	1.1375	0.01768	7	2
294	Q96AE4	332	FUBP1	FUBP1_HUMAN Far upstream element-binding protein 1 OS=Homo sapiens OX=9606 GN=FUBP1 PE=1 SV=3	|IAQITGPPDRC(BTD[C])QHAAEIITDLLR	|2	|1.135	1.135	NA	2	1
295	P40227	282	CCT6A	TCPZ_HUMAN T-complex protein 1 subunit zeta OS=Homo sapiens OX=9606 GN=CCT6A PE=1 SV=3	KVC(BTD[C])GDSDK|KVC(BTD[C])GDSDK	3|1	1.13|1.13	1.13	0	4	2
296	Q96B97	272	SH3KBP1	SH3K1_HUMAN SH3 domain-containing kinase-binding protein 1 OS=Homo sapiens OX=9606 GN=SH3KBP1 PE=1 SV=2	SKDYC(BTD[C])K|	1|	1.13|	1.13	NA	1	1
297	P00352	50	ALDH1A1	AL1A1_HUMAN Retinal dehydrogenase 1 OS=Homo sapiens OX=9606 GN=ALDH1A1 PE=1 SV=2	C(BTD[C])QVEEGDKEDVDK ELC(BTD[C])QVEEGDKEDVDK NPATEEELC(BTD[C])QVEEGDKEDVDK KFPVFNPATEEELC(BTD[C])QVEEGDKEDVDK KFPVFNPATEEELC(BTD[C])QVEEGDK FPVFNPATEEELC(BTD[C])QVEEGDKEDVDK|NPATEEELC(BTD[C])QVEEGDKEDVDK KFPVFNPATEEELC(BTD[C])QVEEGDKEDVDK KFPVFNPATEEELC(BTD[C])QVEEGDK FPVFNPATEEELC(BTD[C])QVEEGDKEDVDK	9|6	1.1|1.16	1.13	0.04243	15	2
298	Q52LJ0	113	FAM98B	FA98B_HUMAN Protein FAM98B OS=Homo sapiens OX=9606 GN=FAM98B PE=1 SV=2	KEDC(BTD[C])LK|	1|	1.13|	1.13	NA	1	1
299	Q15185	40	PTGES3	TEBP_HUMAN Prostaglandin E synthase 3 OS=Homo sapiens OX=9606 GN=PTGES3 PE=1 SV=1	SC(BTD[C])LGGSDNFK|	1|	1.13|	1.13	NA	1	1
300	O15523	315	DDX3Y	DDX3Y_HUMAN ATP-dependent RNA helicase DDX3Y OS=Homo sapiens OX=9606 GN=DDX3Y PE=1 SV=2	GC(BTD[C])HLLVATPGR|	2|	1.13|	1.13	NA	2	1
301	Q14152	78	EIF3A	EIF3A_HUMAN Eukaryotic translation initiation factor 3 subunit A OS=Homo sapiens OX=9606 GN=EIF3A PE=1 SV=1	NIC(BTD[C])QQVNIK|	2|	1.13|	1.13	NA	2	1
302	P46779	13	RPL28	RL28_HUMAN 60S ribosomal protein L28 OS=Homo sapiens OX=9606 GN=RPL28 PE=1 SV=3	NC(BTD[C])SSFLIK|NC(BTD[C])SSFLIK	2|1	1.16|1.1	1.13	0.04243	3	2
303	Q9BSH4	112	TACO1	TACO1_HUMAN Translational activator of cytochrome c oxidase 1 OS=Homo sapiens OX=9606 GN=TACO1 PE=1 SV=1	EGGPNPEHNSNLANILEVC(BTD[C])R|	1|	1.13|	1.13	NA	1	1
304	Q14566	26	MCM6	MCM6_HUMAN DNA replication licensing factor MCM6 OS=Homo sapiens OX=9606 GN=MCM6 PE=1 SV=1	VAEKC(BTD[C])QK|	1|	1.13|	1.13	NA	1	1
305	Q5SW79	776	CEP170	CE170_HUMAN Centrosomal protein of 170 kDa OS=Homo sapiens OX=9606 GN=CEP170 PE=1 SV=1	NVSGQTDKC(BTD[C])R|	1|	1.13|	1.13	NA	1	1
306	P49720	19	PSMB3	PSB3_HUMAN Proteasome subunit beta type-3 OS=Homo sapiens OX=9606 GN=PSMB3 PE=1 SV=2	KNC(BTD[C])VAIAADR NC(BTD[C])VAIAADRR|KNC(BTD[C])VAIAADR NC(BTD[C])VAIAADRR NC(BTD[C])VAIAADR	3|4	1.11|1.145	1.1275	0.02475	7	2
307	Q01469	47	FABP5	FABP5_HUMAN Fatty acid-binding protein 5 OS=Homo sapiens OX=9606 GN=FABP5 PE=1 SV=3	KPDCIITC(BTD[C])DGK AKPDCIITC(BTD[C])DGK|AKPDCIITC(BTD[C])DGK	4|2	0.985|1.27	1.1275	0.20153	6	2
308	P31948	370	STIP1	STIP1_HUMAN Stress-induced-phosphoprotein 1 OS=Homo sapiens OX=9606 GN=STIP1 PE=1 SV=1	GNEC(BTD[C])FQK|GNEC(BTD[C])FQK	1|1	1.11|1.14	1.125	0.02121	2	2
309	P23528	39	CFL1	COF1_HUMAN Cofilin-1 OS=Homo sapiens OX=9606 GN=CFL1 PE=1 SV=3	FC(BTD[C])LSEDKK LFC(BTD[C])LSEDKK FC(BTD[C])LSEDK VLFC(BTD[C])LSEDKK AVLFC(BTD[C])LSEDKK|FC(BTD[C])LSEDKK VLFC(BTD[C])LSEDKK	9|7	1.26|0.99	1.125	0.19092	16	2
310	O43815	740	STRN	STRN_HUMAN Striatin OS=Homo sapiens OX=9606 GN=STRN PE=1 SV=4	TC(BTD[C])IQEFTAHR|TC(BTD[C])IQEFTAHR	1|1	0.84|1.41	1.125	0.40305	2	2
311	P67936	154	TPM4	TPM4_HUMAN Tropomyosin alpha-4 chain OS=Homo sapiens OX=9606 GN=TPM4 PE=1 SV=3	AEVSELKC(BTD[C])GDLEEELK|AEVSELKC(BTD[C])GDLEEELK	2|1	1.0|1.25	1.125	0.17678	3	2
312	Q9GZT3	48	SLIRP	SLIRP_HUMAN SRA stem-loop-interacting RNA-binding protein, mitochondrial OS=Homo sapiens OX=9606 GN=SLIRP PE=1 SV=1	RC(BTD[C])ILPFDK|RC(BTD[C])ILPFDK	3|3	1.11|1.14	1.125	0.02121	6	2
313	P23396	97	RPS3	RS3_HUMAN 40S ribosomal protein S3 OS=Homo sapiens OX=9606 GN=RPS3 PE=1 SV=2	GLC(BTD[C])AIAQAESLR|GLC(BTD[C])AIAQAESLR	2|1	1.28|0.97	1.125	0.2192	3	2
314	P63220	17	RPS21	RS21_HUMAN 40S ribosomal protein S21 OS=Homo sapiens OX=9606 GN=RPS21 PE=1 SV=1	KC(BTD[C])SASNR|KC(BTD[C])SASNR	3|3	1.11|1.14	1.125	0.02121	6	2
315	Q6NW34	419	NEPRO	NEPRO_HUMAN Nucleolus and neural progenitor protein OS=Homo sapiens OX=9606 GN=NEPRO PE=1 SV=3	|KLEC(BTD[C])IK	|4	|1.125	1.125	NA	4	1
316	Q9H3K6	59	BOLA2	BOLA2_HUMAN BolA-like protein 2 OS=Homo sapiens OX=9606 GN=BOLA2 PE=1 SV=1	AC(BTD[C])LAEELPHIHAFEQK LVNAC(BTD[C])LAEELPHIHAFEQK|VNAC(BTD[C])LAEELPHIHAFEQK LVNAC(BTD[C])LAEELPHIHAFEQK	4|3	0.845|1.4	1.1225	0.39244	7	2
317	P63104	25	YWHAZ	1433Z_HUMAN 14-3-3 protein zeta/delta OS=Homo sapiens OX=9606 GN=YWHAZ PE=1 SV=1	MAAC(BTD[C])MK YDDMAAC(BTD[C])MK|	10|	1.12|	1.12	NA	10	1
318	O95373	736	IPO7	IPO7_HUMAN Importin-7 OS=Homo sapiens OX=9606 GN=IPO7 PE=1 SV=1	VLTGVAGEDAEC(BTD[C])HAAK|	1|	1.12|	1.12	NA	1	1
319	Q9NZM1	409	MYOF	MYOF_HUMAN Myoferlin OS=Homo sapiens OX=9606 GN=MYOF PE=1 SV=1	KVC(BTD[C])TNIIEK|	1|	1.12|	1.12	NA	1	1
320	O75369	2333	FLNB	FLNB_HUMAN Filamin-B OS=Homo sapiens OX=9606 GN=FLNB PE=1 SV=2	VHSPSGAVEEC(BTD[C])HVSELEPDK|	2|	1.12|	1.12	NA	2	1
321	Q9ULA0	327	DNPEP	DNPEP_HUMAN Aspartyl aminopeptidase OS=Homo sapiens OX=9606 GN=DNPEP PE=1 SV=1	ISASC(BTD[C])QHPTAFEEAIPK|	1|	1.12|	1.12	NA	1	1
322	P09936	220	UCHL1	UCHL1_HUMAN Ubiquitin carboxyl-terminal hydrolase isozyme L1 OS=Homo sapiens OX=9606 GN=UCHL1 PE=1 SV=2	FSAVALC(BTD[C])K|FSAVALC(BTD[C])K	2|1	1.15|1.09	1.12	0.04243	3	2
323	P10809	442	HSPD1	CH60_HUMAN 60 kDa heat shock protein, mitochondrial OS=Homo sapiens OX=9606 GN=HSPD1 PE=1 SV=2	|AAVEEGIVLGGGC(BTD[C])ALLR	|2	|1.12	1.12	NA	2	1
324	Q01780	852	EXOSC10	EXOSX_HUMAN Exosome component 10 OS=Homo sapiens OX=9606 GN=EXOSC10 PE=1 SV=2	KC(BTD[C])IAAK|	2|	1.115|	1.115	NA	2	1
325	P07237	312	P4HB	PDIA1_HUMAN Protein disulfide-isomerase OS=Homo sapiens OX=9606 GN=P4HB PE=1 SV=3	KEEC(BTD[C])PAVR|KEEC(BTD[C])PAVR EEC(BTD[C])PAVR	3|3	1.19|1.04	1.115	0.10607	6	2
326	P31153	56	MAT2A	METK2_HUMAN S-adenosylmethionine synthase isoform type-2 OS=Homo sapiens OX=9606 GN=MAT2A PE=1 SV=1	AC(BTD[C])ETVAK|AC(BTD[C])ETVAK	2|2	0.87|1.36	1.115	0.34648	4	2
327	P37235	38	HPCAL1	HPCL1_HUMAN Hippocalcin-like protein 1 OS=Homo sapiens OX=9606 GN=HPCAL1 PE=1 SV=3	DC(BTD[C])PTGHLTVDEFKK GFLKDC(BTD[C])PTGHLTVDEFK|DC(BTD[C])PTGHLTVDEFKK DC(BTD[C])PTGHLTVDEFK GFLKDC(BTD[C])PTGHLTVDEFK	4|4	1.07|1.16	1.115	0.06364	8	2
328	P34932	38	HSPA4	HSP74_HUMAN Heat shock 70 kDa protein 4 OS=Homo sapiens OX=9606 GN=HSPA4 PE=1 SV=4	TPAC(BTD[C])ISFGPK|TPAC(BTD[C])ISFGPK	2|3	1.04|1.19	1.115	0.10607	5	2
329	P26368	429	U2AF2	U2AF2_HUMAN Splicing factor U2AF 65 kDa subunit OS=Homo sapiens OX=9606 GN=U2AF2 PE=1 SV=4	SIEIPRPVDGVEVPGC(BTD[C])GK|SIEIPRPVDGVEVPGC(BTD[C])GK	2|1	1.11|1.12	1.115	0.00707	3	2
330	P62140	126	PPP1CB	PP1B_HUMAN Serine/threonine-protein phosphatase PP1-beta catalytic subunit OS=Homo sapiens OX=9606 GN=PPP1CB PE=1 SV=3	GNHEC(BTD[C])ASINR|GNHEC(BTD[C])ASINR	2|3	1.18|1.04	1.11	0.09899	5	2
331	Q96AT9	217	RPE	RPE_HUMAN Ribulose-phosphate 3-epimerase OS=Homo sapiens OX=9606 GN=RPE PE=1 SV=1	NVC(BTD[C])SEAAQK|NVC(BTD[C])SEAAQK	1|1	1.12|1.1	1.11	0.01414	2	2
332	P62316	63	SNRPD2	SMD2_HUMAN Small nuclear ribonucleoprotein Sm D2 OS=Homo sapiens OX=9606 GN=SNRPD2 PE=1 SV=1	HC(BTD[C])NMVLENVK|HC(BTD[C])NMVLENVK	8|7	1.24|0.98	1.11	0.18385	15	2
333	P42285	399	MTREX	MTREX_HUMAN Exosome RNA helicase MTR4 OS=Homo sapiens OX=9606 GN=MTREX PE=1 SV=3	KDC(BTD[C])EAYALQMTK|	1|	1.11|	1.11	NA	1	1
334	Q14152	478	EIF3A	EIF3A_HUMAN Eukaryotic translation initiation factor 3 subunit A OS=Homo sapiens OX=9606 GN=EIF3A PE=1 SV=1	HC(BTD[C])DLQVR|	3|	1.11|	1.11	NA	3	1
335	Q15393	1156	SF3B3	SF3B3_HUMAN Splicing factor 3B subunit 3 OS=Homo sapiens OX=9606 GN=SF3B3 PE=1 SV=4	SEHPPLC(BTD[C])GR|	1|	1.11|	1.11	NA	1	1
336	O95782	331	AP2A1	AP2A1_HUMAN AP-2 complex subunit alpha-1 OS=Homo sapiens OX=9606 GN=AP2A1 PE=1 SV=3	AC(BTD[C])NQLGQFLQHR|	1|	1.11|	1.11	NA	1	1
337	Q9UQE7	939	SMC3	SMC3_HUMAN Structural maintenance of chromosomes protein 3 OS=Homo sapiens OX=9606 GN=SMC3 PE=1 SV=2	KEEC(BTD[C])MK|	2|	1.11|	1.11	NA	2	1
338	Q16762	248	TST	THTR_HUMAN Thiosulfate sulfurtransferase OS=Homo sapiens OX=9606 GN=TST PE=1 SV=4	|KVDLSQPLIATC(BTD[C])R	|2	|1.11	1.11	NA	2	1	Active site
339	Q9UH65	273	SWAP70	SWP70_HUMAN Switch-associated protein 70 OS=Homo sapiens OX=9606 GN=SWAP70 PE=1 SV=1	|KC(BTD[C])LFLVK	|1	|1.11	1.11	NA	1	1
340	P48637	409	GSS	GSHB_HUMAN Glutathione synthetase OS=Homo sapiens OX=9606 GN=GSS PE=1 SV=1	|IEPEPFENC(BTD[C])LLRPGSPAR	|1	|1.11	1.11	NA	1	1
341	Q16576	166	RBBP7	RBBP7_HUMAN Histone-binding protein RBBP7 OS=Homo sapiens OX=9606 GN=RBBP7 PE=1 SV=1	HPAKPDPSGEC(BTD[C])NPDLR|HPAKPDPSGEC(BTD[C])NPDLR	2|4	1.15|1.06	1.105	0.06364	6	2
342	P52597	122	HNRNPF	HNRPF_HUMAN Heterogeneous nuclear ribonucleoprotein F OS=Homo sapiens OX=9606 GN=HNRNPF PE=1 SV=3	GLPFGC(BTD[C])TK|	2|	1.105|	1.105	NA	2	1
343	P62316	46	SNRPD2	SMD2_HUMAN Small nuclear ribonucleoprotein Sm D2 OS=Homo sapiens OX=9606 GN=SNRPD2 PE=1 SV=1	TQVLINC(BTD[C])R|NNTQVLINC(BTD[C])R QVLINC(BTD[C])R NTQVLINC(BTD[C])R	1|4	0.95|1.255	1.1025	0.21567	5	2
344	Q96EP5	85	DAZAP1	DAZP1_HUMAN DAZ-associated protein 1 OS=Homo sapiens OX=9606 GN=DAZAP1 PE=1 SV=1	NIDPKPC(BTD[C])TPR|	1|	1.1|	1.1	NA	1	1
345	P00390	461	GSR	GSHR_HUMAN Glutathione reductase, mitochondrial OS=Homo sapiens OX=9606 GN=GSR PE=1 SV=2	TKC(BTD[C])VMK|	7|	1.1|	1.1	NA	7	1
346	P49841	107	GSK3B	GSK3B_HUMAN Glycogen synthase kinase-3 beta OS=Homo sapiens OX=9606 GN=GSK3B PE=1 SV=2	LDHC(BTD[C])NIVR|	1|	1.1|	1.1	NA	1	1
347	Q16181	204	2020-09-07	SEPT7_HUMAN Septin-7 OS=Homo sapiens OX=9606 GN=SEPT7 PE=1 SV=2	ADTLTPEEC(BTD[C])QQFKK|	1|	1.1|	1.1	NA	1	1
348	Q5H9R7	216	PPP6R3	PP6R3_HUMAN Serine/threonine-protein phosphatase 6 regulatory subunit 3 OS=Homo sapiens OX=9606 GN=PPP6R3 PE=1 SV=2	|HSNASQSLC(BTD[C])EIVR	|2	|1.1	1.1	NA	2	1
349	O75390	211	CS	CISY_HUMAN Citrate synthase, mitochondrial OS=Homo sapiens OX=9606 GN=CS PE=1 SV=2	|LPC(BTD[C])VAAK	|2	|1.1	1.1	NA	2	1
350	P00492	206	HPRT1	HPRT_HUMAN Hypoxanthine-guanine phosphoribosyltransferase OS=Homo sapiens OX=9606 GN=HPRT1 PE=1 SV=2	|DLNHVC(BTD[C])VISETGK	|2	|1.1	1.1	NA	2	1
351	Q06323	106	PSME1	PSME1_HUMAN Proteasome activator complex subunit 1 OS=Homo sapiens OX=9606 GN=PSME1 PE=1 SV=1	KGEDEDKGPPCGPVNC(BTD[C])NEK|KGEDEDKGPPCGPVNC(BTD[C])NEK	1|1	1.3|0.89	1.095	0.28991	2	2
352	Q9BXJ9	309	NAA15	NAA15_HUMAN N-alpha-acetyltransferase 15, NatA auxiliary subunit OS=Homo sapiens OX=9606 GN=NAA15 PE=1 SV=1	FKEC(BTD[C])LDK|FKEC(BTD[C])LDK	1|1	1.06|1.13	1.095	0.0495	2	2
353	P49368	40	CCT3	TCPG_HUMAN T-complex protein 1 subunit gamma OS=Homo sapiens OX=9606 GN=CCT3 PE=1 SV=4	TC(BTD[C])LGPK|TC(BTD[C])LGPK	3|1	1.19|1.0	1.095	0.13435	4	2
354	Q15233	145	NONO	NONO_HUMAN Non-POU domain-containing octamer-binding protein OS=Homo sapiens OX=9606 GN=NONO PE=1 SV=4	FAC(BTD[C])HSASLTVR|FAC(BTD[C])HSASLTVR	1|1	1.12|1.07	1.095	0.03536	2	2
355	P31948	339	STIP1	STIP1_HUMAN Stress-induced-phosphoprotein 1 OS=Homo sapiens OX=9606 GN=STIP1 PE=1 SV=1	KC(BTD[C])QQAEK|KC(BTD[C])QQAEK	2|2	1.07|1.12	1.095	0.03536	4	2
356	P23919	31	DTYMK	KTHY_HUMAN Thymidylate kinase OS=Homo sapiens OX=9606 GN=DTYMK PE=1 SV=4	LC(BTD[C])AAGHR|LC(BTD[C])AAGHR	4|2	1.075|1.11	1.0925	0.02475	6	2
357	Q9H0S4	226	DDX47	DDX47_HUMAN Probable ATP-dependent RNA helicase DDX47 OS=Homo sapiens OX=9606 GN=DDX47 PE=1 SV=1	NPVKC(BTD[C])AVSSK|	1|	1.09|	1.09	NA	1	1
358	Q13616	291	CUL1	CUL1_HUMAN Cullin-1 OS=Homo sapiens OX=9606 GN=CUL1 PE=1 SV=2	KC(BTD[C])EQVLIEK|	2|	1.09|	1.09	NA	2	1
359	P13010	235	XRCC5	XRCC5_HUMAN X-ray repair cross-complementing protein 5 OS=Homo sapiens OX=9606 GN=XRCC5 PE=1 SV=3	KLC(BTD[C])VFK|	1|	1.09|	1.09	NA	1	1
360	Q9ULC4	144	MCTS1	MCTS1_HUMAN Malignant T-cell-amplified sequence 1 OS=Homo sapiens OX=9606 GN=MCTS1 PE=1 SV=1	|QHALC(BTD[C])VGVMK	|1	|1.09	1.09	NA	1	1
361	P16435	363	POR	NCPR_HUMAN NADPH--cytochrome P450 reductase OS=Homo sapiens OX=9606 GN=POR PE=1 SV=2	|HPFPC(BTD[C])PTSYR	|2	|1.09	1.09	NA	2	1
362	Q96KR1	899	ZFR	ZFR_HUMAN Zinc finger RNA-binding protein OS=Homo sapiens OX=9606 GN=ZFR PE=1 SV=2	|QKC(BTD[C])LDALAALR	|3	|1.09	1.09	NA	3	1
363	P05388	119	RPLP0	RLA0_HUMAN 60S acidic ribosomal protein P0 OS=Homo sapiens OX=9606 GN=RPLP0 PE=1 SV=1	|AGAIAPC(BTD[C])EVTVPAQNTGLGPEK	|2	|1.09	1.09	NA	2	1
364	O00566	27	MPHOSPH10	MPP10_HUMAN U3 small nucleolar ribonucleoprotein protein MPP10 OS=Homo sapiens OX=9606 GN=MPHOSPH10 PE=1 SV=2	|ATGRPEC(BTD[C])FLTIQEGLASK	|2	|1.09	1.09	NA	2	1
365	P55072	522	VCP	TERA_HUMAN Transitional endoplasmic reticulum ATPase OS=Homo sapiens OX=9606 GN=VCP PE=1 SV=4	GPPGC(BTD[C])GK|GPPGC(BTD[C])GK	2|2	1.155|1.02	1.0875	0.09546	4	2
366	Q01469	43	FABP5	FABP5_HUMAN Fatty acid-binding protein 5 OS=Homo sapiens OX=9606 GN=FABP5 PE=1 SV=3	KPDC(BTD[C])IITCDGK|AKPDC(BTD[C])IITCDGK KPDC(BTD[C])IITCDGK	4|3	1.13|1.04	1.085	0.06364	7	2
367	P17655	82	CAPN2	CAN2_HUMAN Calpain-2 catalytic subunit OS=Homo sapiens OX=9606 GN=CAPN2 PE=1 SV=6	RPTEIC(BTD[C])ADPQFIIGGATR|RPTEIC(BTD[C])ADPQFIIGGATR	2|1	1.15|1.02	1.085	0.09192	3	2
368	O95249	34	GOSR1	GOSR1_HUMAN Golgi SNAP receptor complex member 1 OS=Homo sapiens OX=9606 GN=GOSR1 PE=1 SV=1	LC(BTD[C])TSYSHSSTR|	2|	1.08|	1.08	NA	2	1
369	P23528	139	CFL1	COF1_HUMAN Cofilin-1 OS=Homo sapiens OX=9606 GN=CFL1 PE=1 SV=3	HELQANC(BTD[C])YEEVKDR HELQANC(BTD[C])YEEVK|HELQANC(BTD[C])YEEVKDR HELQANC(BTD[C])YEEVK	5|4	1.18|0.98	1.08	0.14142	9	2
370	O60841	1126	EIF5B	IF2P_HUMAN Eukaryotic translation initiation factor 5B OS=Homo sapiens OX=9606 GN=EIF5B PE=1 SV=4	QGTPMC(BTD[C])VPSK|	2|	1.08|	1.08	NA	2	1
371	P14618	326	PKM	KPYM_HUMAN Pyruvate kinase PKM OS=Homo sapiens OX=9606 GN=PKM PE=1 SV=4	AGKPVIC(BTD[C])ATQMLESMIK PVIC(BTD[C])ATQMLESMIK|AGKPVIC(BTD[C])ATQMLESMIK PVIC(BTD[C])ATQMLESMIK	23|21	1.08|1.08	1.08	0	44	2
372	P45974	195	USP5	UBP5_HUMAN Ubiquitin carboxyl-terminal hydrolase 5 OS=Homo sapiens OX=9606 GN=USP5 PE=1 SV=2	IPPC(BTD[C])GWK|	1|	1.08|	1.08	NA	1	1	Disulfide bond
373	P12955	183	PEPD	PEPD_HUMAN Xaa-Pro dipeptidase OS=Homo sapiens OX=9606 GN=PEPD PE=1 SV=3	FEVNNTILHPEIVEC(BTD[C])R|	1|	1.08|	1.08	NA	1	1
374	P13010	493	XRCC5	XRCC5_HUMAN X-ray repair cross-complementing protein 5 OS=Homo sapiens OX=9606 GN=XRCC5 PE=1 SV=3	LFQC(BTD[C])LLHR|	1|	1.08|	1.08	NA	1	1
375	P78527	223	PRKDC	PRKDC_HUMAN DNA-dependent protein kinase catalytic subunit OS=Homo sapiens OX=9606 GN=PRKDC PE=1 SV=3	LPVLAGC(BTD[C])LK|	1|	1.08|	1.08	NA	1	1
376	Q3MHD2	127	LSM12	LSM12_HUMAN Protein LSM12 homolog OS=Homo sapiens OX=9606 GN=LSM12 PE=1 SV=2	|TIKDC(BTD[C])K	|1	|1.08	1.08	NA	1	1
377	Q9Y5X3	227	SNX5	SNX5_HUMAN Sorting nexin-5 OS=Homo sapiens OX=9606 GN=SNX5 PE=1 SV=1	|IKDSC(BTD[C])VK	|1	|1.08	1.08	NA	1	1
378	P18206	1040	VCL	VINC_HUMAN Vinculin OS=Homo sapiens OX=9606 GN=VCL PE=1 SV=4	QC(BTD[C])TDKR|QC(BTD[C])TDKR	2|4	1.06|1.095	1.0775	0.02475	6	2
379	P50991	295	CCT4	TCPD_HUMAN T-complex protein 1 subunit delta OS=Homo sapiens OX=9606 GN=CCT4 PE=1 SV=4	KTGC(BTD[C])NVLLIQK|TGC(BTD[C])NVLLIQK	1|1	1.01|1.14	1.075	0.09192	2	2
380	P31943	122	HNRNPH1	HNRH1_HUMAN Heterogeneous nuclear ribonucleoprotein H OS=Homo sapiens OX=9606 GN=HNRNPH1 PE=1 SV=4	LPFGC(BTD[C])SK GLPFGC(BTD[C])SK|	4|	1.075|	1.075	NA	4	1
381	P21333	2160	FLNA	FLNA_HUMAN Filamin-A OS=Homo sapiens OX=9606 GN=FLNA PE=1 SV=4	APSVANVGSHC(BTD[C])DLSLK|APSVANVGSHC(BTD[C])DLSLK	3|2	0.92|1.225	1.0725	0.21567	5	2
382	P60660	32	MYL6	MYL6_HUMAN Myosin light polypeptide 6 OS=Homo sapiens OX=9606 GN=MYL6 PE=1 SV=2	YSQC(BTD[C])GDVMR SQC(BTD[C])GDVMR|SQC(BTD[C])GDVMR QC(BTD[C])GDVMR	4|4	1.3|0.84	1.07	0.32527	8	2
383	Q16658	89	FSCN1	FSCN1_HUMAN Fascin OS=Homo sapiens OX=9606 GN=FSCN1 PE=1 SV=3	PGPDC(BTD[C])R|PGPDC(BTD[C])R	2|1	1.19|0.95	1.07	0.16971	3	2
384	Q9Y281	39	CFL2	COF2_HUMAN Cofilin-2 OS=Homo sapiens OX=9606 GN=CFL2 PE=1 SV=1	FC(BTD[C])LSDDKR|	4|	1.07|	1.07	NA	4	1
385	Q9Y4Z0	59	LSM4	LSM4_HUMAN U6 snRNA-associated Sm-like protein LSm4 OS=Homo sapiens OX=9606 GN=LSM4 PE=1 SV=1	MPEC(BTD[C])YIR|MPEC(BTD[C])YIR	3|1	1.11|1.03	1.07	0.05657	4	2
386	P30050	141	RPL12	RL12_HUMAN 60S ribosomal protein L12 OS=Homo sapiens OX=9606 GN=RPL12 PE=1 SV=1	EILGTAQSVGC(BTD[C])NVDGR|EILGTAQSVGC(BTD[C])NVDGR	1|1	1.22|0.92	1.07	0.21213	2	2
387	P28066	165	PSMA5	PSA5_HUMAN Proteasome subunit alpha type-5 OS=Homo sapiens OX=9606 GN=PSMA5 PE=1 SV=3	GPQLFHMDPSGTFVQC(BTD[C])DAR|	1|	1.07|	1.07	NA	1	1
388	Q12797	648	ASPH	ASPH_HUMAN Aspartyl/asparaginyl beta-hydroxylase OS=Homo sapiens OX=9606 GN=ASPH PE=1 SV=3	TC(BTD[C])TLLEK|	2|	1.07|	1.07	NA	2	1	Disulfide bond
389	Q14789	2233	GOLGB1	GOGB1_HUMAN Golgin subfamily B member 1 OS=Homo sapiens OX=9606 GN=GOLGB1 PE=1 SV=2	|LKEDNC(BTD[C])SVLK	|1	|1.07	1.07	NA	1	1
390	P31942	27	HNRNPH3	HNRH3_HUMAN Heterogeneous nuclear ribonucleoprotein H3 OS=Homo sapiens OX=9606 GN=HNRNPH3 PE=1 SV=2	|LPFGC(BTD[C])SK GLPFGC(BTD[C])SK	|3	|1.07	1.07	NA	3	1
391	O75531	67	BANF1	BAF_HUMAN Barrier-to-autointegration factor OS=Homo sapiens OX=9606 GN=BANF1 PE=1 SV=1	DTC(BTD[C])GANAK|DTC(BTD[C])GANAK	2|2	1.08|1.055	1.0675	0.01768	4	2
392	Q99729	224	HNRNPAB	ROAA_HUMAN Heterogeneous nuclear ribonucleoprotein A/B OS=Homo sapiens OX=9606 GN=HNRNPAB PE=1 SV=2	FHTVSGSKC(BTD[C])EIK|FHTVSGSKC(BTD[C])EIK	2|2	1.07|1.06	1.065	0.00707	4	2
393	P62753	12	RPS6	RS6_HUMAN 40S ribosomal protein S6 OS=Homo sapiens OX=9606 GN=RPS6 PE=1 SV=1	FPATGC(BTD[C])QK ISFPATGC(BTD[C])QK NISFPATGC(BTD[C])QK|FPATGC(BTD[C])QK ISFPATGC(BTD[C])QK NISFPATGC(BTD[C])QK	5|6	1.0|1.13	1.065	0.09192	11	2
394	O43390	226	HNRNPR	HNRPR_HUMAN Heterogeneous nuclear ribonucleoprotein R OS=Homo sapiens OX=9606 GN=HNRNPR PE=1 SV=1	LC(BTD[C])DSYEIRPGK|LC(BTD[C])DSYEIRPGK	4|4	1.045|1.085	1.065	0.02828	8	2
395	P12270	1068	TPR	TPR_HUMAN Nucleoprotein TPR OS=Homo sapiens OX=9606 GN=TPR PE=1 SV=3	RDC(BTD[C])QEQAK|RDC(BTD[C])QEQAK	1|4	1.1|1.03	1.065	0.0495	5	2
396	P27348	25	YWHAQ	1433T_HUMAN 14-3-3 protein theta OS=Homo sapiens OX=9606 GN=YWHAQ PE=1 SV=1	MATC(BTD[C])MK YDDMATC(BTD[C])MK|	3|	1.06|	1.06	NA	3	1
397	Q14152	198	EIF3A	EIF3A_HUMAN Eukaryotic translation initiation factor 3 subunit A OS=Homo sapiens OX=9606 GN=EIF3A PE=1 SV=1	KLC(BTD[C])DNLR LC(BTD[C])DNLR|KLC(BTD[C])DNLR	3|2	0.87|1.25	1.06	0.2687	5	2
398	Q16719	425	KYNU	KYNU_HUMAN Kynureninase OS=Homo sapiens OX=9606 GN=KYNU PE=1 SV=1	GVVC(BTD[C])DKR|GVVC(BTD[C])DKR	4|3	1.115|1.0	1.0575	0.08132	7	2
399	Q13838	165	DDX39B	DX39B_HUMAN Spliceosome RNA helicase DDX39B OS=Homo sapiens OX=9606 GN=DDX39B PE=1 SV=1	NC(BTD[C])PHIVVGTPGR|NC(BTD[C])PHIVVGTPGR	2|4	1.01|1.105	1.0575	0.06718	6	2
400	Q12965	1056	MYO1E	MYO1E_HUMAN Unconventional myosin-Ie OS=Homo sapiens OX=9606 GN=MYO1E PE=1 SV=2	PKPQVPQC(BTD[C])K|PKPQVPQC(BTD[C])K	2|3	1.05|1.06	1.055	0.00707	5	2
401	P07814	1377	EPRS	SYEP_HUMAN Bifunctional glutamate/proline--tRNA ligase OS=Homo sapiens OX=9606 GN=EPRS PE=1 SV=5	SC(BTD[C])QFVAVR|SC(BTD[C])QFVAVR	2|2	1.14|0.97	1.055	0.12021	4	2
402	P11142	603	HSPA8	HSP7C_HUMAN Heat shock cognate 71 kDa protein OS=Homo sapiens OX=9606 GN=HSPA8 PE=1 SV=1	ELEKVC(BTD[C])NPIITK VC(BTD[C])NPIITK|ELEKVC(BTD[C])NPIITK VC(BTD[C])NPIITK	4|6	1.22|0.885	1.0525	0.23688	10	2
403	P62937	52	PPIA	PPIA_HUMAN Peptidyl-prolyl cis-trans isomerase A OS=Homo sapiens OX=9606 GN=PPIA PE=1 SV=2	GSC(BTD[C])FHR|	2|	1.05|	1.05	NA	2	1
404	Q8WTS6	288	SETD7	SETD7_HUMAN Histone-lysine N-methyltransferase SETD7 OS=Homo sapiens OX=9606 GN=SETD7 PE=1 SV=1	YC(BTD[C])ASLGHK|	2|	1.05|	1.05	NA	2	1
405	P18206	325	VCL	VINC_HUMAN Vinculin OS=Homo sapiens OX=9606 GN=VCL PE=1 SV=4	REILGTC(BTD[C])K|REILGTC(BTD[C])K	2|1	1.0|1.1	1.05	0.07071	3	2
406	P14678	19	SNRPB	RSMB_HUMAN Small nuclear ribonucleoprotein-associated proteins B and B' OS=Homo sapiens OX=9606 GN=SNRPB PE=1 SV=2	MRC(BTD[C])ILQDGR|MRC(BTD[C])ILQDGR RC(BTD[C])ILQDGR	7|3	1.0|1.1	1.05	0.07071	10	2
407	P14618	358	PKM	KPYM_HUMAN Pyruvate kinase PKM OS=Homo sapiens OX=9606 GN=PKM PE=1 SV=4	|AEGSDVANAVLDGADC(BTD[C])IMLSGETAK	|1	|1.05	1.05	NA	1	1
408	P60981	147	DSTN	DEST_HUMAN Destrin OS=Homo sapiens OX=9606 GN=DSTN PE=1 SV=3	AC(BTD[C])IAEK|AC(BTD[C])IAEK	1|2	1.08|1.01	1.045	0.0495	3	2
409	O43143	750	DHX15	DHX15_HUMAN Pre-mRNA-splicing factor ATP-dependent RNA helicase DHX15 OS=Homo sapiens OX=9606 GN=DHX15 PE=1 SV=2	TC(BTD[C])TDIKPEWLVK|TC(BTD[C])TDIKPEWLVK	1|1	0.96|1.13	1.045	0.12021	2	2
410	O00154	92	ACOT7	BACH_HUMAN Cytosolic acyl coenzyme A thioester hydrolase OS=Homo sapiens OX=9606 GN=ACOT7 PE=1 SV=3	HC(BTD[C])NSQNGER|HC(BTD[C])NSQNGER	1|2	0.88|1.21	1.045	0.23335	3	2
411	O15145	85	ARPC3	ARPC3_HUMAN Actin-related protein 2/3 complex subunit 3 OS=Homo sapiens OX=9606 GN=ARPC3 PE=1 SV=3	LQKC(BTD[C])NSK|LQKC(BTD[C])NSK	1|3	1.01|1.08	1.045	0.0495	4	2
412	Q93008	1724	USP9X	USP9X_HUMAN Probable ubiquitin carboxyl-terminal hydrolase FAF-X OS=Homo sapiens OX=9606 GN=USP9X PE=1 SV=3	IC(BTD[C])QGCPHR|IC(BTD[C])QGCPHR	1|1	1.05|1.03	1.04	0.01414	2	2
413	O60841	1158	EIF5B	IF2P_HUMAN Eukaryotic translation initiation factor 5B OS=Homo sapiens OX=9606 GN=EIF5B PE=1 SV=4	KGQEVC(BTD[C])VK|KGQEVC(BTD[C])VK	2|1	1.06|1.02	1.04	0.02828	3	2
414	O14979	303	HNRNPDL	HNRDL_HUMAN Heterogeneous nuclear ribonucleoprotein D-like OS=Homo sapiens OX=9606 GN=HNRNPDL PE=1 SV=3	YHQIGSGKC(BTD[C])EIK|YHQIGSGKC(BTD[C])EIK	2|1	1.02|1.06	1.04	0.02828	3	2
415	Q9Y316	244	MEMO1	MEMO1_HUMAN Protein MEMO1 OS=Homo sapiens OX=9606 GN=MEMO1 PE=1 SV=1	YHNTIC(BTD[C])GR|	3|	1.04|	1.04	NA	3	1
416	P13797	463	PLS3	PLST_HUMAN Plastin-3 OS=Homo sapiens OX=9606 GN=PLS3 PE=1 SV=4	KIENC(BTD[C])NYAVELGK|KIENC(BTD[C])NYAVELGK	2|1	1.08|1.0	1.04	0.05657	3	2
417	P40227	366	CCT6A	TCPZ_HUMAN T-complex protein 1 subunit zeta OS=Homo sapiens OX=9606 GN=CCT6A PE=1 SV=3	FTFIEKC(BTD[C])NNPR|	2|	1.04|	1.04	NA	2	1
418	P30046	24	DDT	DOPD_HUMAN D-dopachrome decarboxylase OS=Homo sapiens OX=9606 GN=DDT PE=1 SV=3	RLC(BTD[C])AAAASILGK LC(BTD[C])AAAASILGK|RLC(BTD[C])AAAASILGK	7|2	1.09|0.99	1.04	0.07071	9	2
419	P40925	137	MDH1	MDHC_HUMAN Malate dehydrogenase, cytoplasmic OS=Homo sapiens OX=9606 GN=MDH1 PE=1 SV=4	VIVVGNPANTNC(BTD[C])LTASK|VIVVGNPANTNC(BTD[C])LTASK	2|1	1.01|1.07	1.04	0.04243	3	2
420	P08670	328	VIM	VIME_HUMAN Vimentin OS=Homo sapiens OX=9606 GN=VIM PE=1 SV=4	QVQSLTC(BTD[C])EVDALK|QVQSLTC(BTD[C])EVDALK	2|2	1.02|1.06	1.04	0.02828	4	2
421	P07099	182	EPHX1	HYEP_HUMAN Epoxide hydrolase 1 OS=Homo sapiens OX=9606 GN=EPHX1 PE=1 SV=1	NHGLSDEHVFEVIC(BTD[C])PSIPGYGFSEASSK|NHGLSDEHVFEVIC(BTD[C])PSIPGYGFSEASSK	2|1	1.1|0.98	1.04	0.08485	3	2
422	P45974	838	USP5	UBP5_HUMAN Ubiquitin carboxyl-terminal hydrolase 5 OS=Homo sapiens OX=9606 GN=USP5 PE=1 SV=2	|VC(BTD[C])ASEKPPK	|1	|1.04	1.04	NA	1	1
423	P62318	20	SNRPD3	SMD3_HUMAN Small nuclear ribonucleoprotein Sm D3 OS=Homo sapiens OX=9606 GN=SNRPD3 PE=1 SV=1	|LHEAEGHIVTC(BTD[C])ETNTGEVYR	|2	|1.04	1.04	NA	2	1
424	P62937	161	PPIA	PPIA_HUMAN Peptidyl-prolyl cis-trans isomerase A OS=Homo sapiens OX=9606 GN=PPIA PE=1 SV=2	|KITIADC(BTD[C])GQLE	|2	|1.04	1.04	NA	2	1
425	P12814	180	ACTN1	ACTN1_HUMAN Alpha-actinin-1 OS=Homo sapiens OX=9606 GN=ACTN1 PE=1 SV=2	FC(BTD[C])AILHR|DGLGFC(BTD[C])ALIHR	2|1	1.145|0.93	1.0375	0.15203	3	2
426	P49327	779	FASN	FAS_HUMAN Fatty acid synthase OS=Homo sapiens OX=9606 GN=FASN PE=1 SV=3	GLKPSC(BTD[C])TIIPLMK|GLKPSC(BTD[C])TIIPLMK	6|7	1.045|1.03	1.0375	0.01061	13	2
427	P60866	70	RPS20	RS20_HUMAN 40S ribosomal protein S20 OS=Homo sapiens OX=9606 GN=RPS20 PE=1 SV=1	KTPC(BTD[C])GEGSK|KTPC(BTD[C])GEGSK TPC(BTD[C])GEGSK	7|5	1.04|1.03	1.035	0.00707	12	2
428	P09874	256	PARP1	PARP1_HUMAN Poly [ADP-ribose] polymerase 1 OS=Homo sapiens OX=9606 GN=PARP1 PE=1 SV=4	KVC(BTD[C])STNDLK|KVC(BTD[C])STNDLK	4|3	1.03|1.04	1.035	0.00707	7	2
429	P62888	52	RPL30	RL30_HUMAN 60S ribosomal protein L30 OS=Homo sapiens OX=9606 GN=RPL30 PE=1 SV=2	NNC(BTD[C])PALR LANNC(BTD[C])PALR|NNC(BTD[C])PALR ANNC(BTD[C])PALR	4|3	1.13|0.94	1.035	0.13435	7	2
430	Q9Y490	1927	TLN1	TLN1_HUMAN Talin-1 OS=Homo sapiens OX=9606 GN=TLN1 PE=1 SV=3	VQELGHGC(BTD[C])AALVTK|VQELGHGC(BTD[C])AALVTK	1|3	1.12|0.95	1.035	0.12021	4	2
431	P52788	237	SMS	SPSY_HUMAN Spermine synthase OS=Homo sapiens OX=9606 GN=SMS PE=1 SV=2	KTC(BTD[C])GDVLDNLK|KTC(BTD[C])GDVLDNLK	3|4	0.98|1.09	1.035	0.07778	7	2
432	Q9UBE0	146	SAE1	SAE1_HUMAN SUMO-activating enzyme subunit 1 OS=Homo sapiens OX=9606 GN=SAE1 PE=1 SV=1	VDQIC(BTD[C])HK|VDQIC(BTD[C])HK	1|2	0.95|1.115	1.0325	0.11667	3	2
433	O14964	75	HGS	HGS_HUMAN Hepatocyte growth factor-regulated tyrosine kinase substrate OS=Homo sapiens OX=9606 GN=HGS PE=1 SV=1	NC(BTD[C])GQTVHDEVANK|	2|	1.03|	1.03	NA	2	1
434	Q14444	226	CAPRIN1	CAPR1_HUMAN Caprin-1 OS=Homo sapiens OX=9606 GN=CAPRIN1 PE=1 SV=2	EKPVC(BTD[C])GTTYK|EKPVC(BTD[C])GTTYK	2|1	1.03|1.03	1.03	0	3	2
435	P50238	28	CRIP1	CRIP1_HUMAN Cysteine-rich protein 1 OS=Homo sapiens OX=9606 GN=CRIP1 PE=1 SV=3	DWHRPC(BTD[C])LK|	1|	1.03|	1.03	NA	1	1
436	P18206	545	VCL	VINC_HUMAN Vinculin OS=Homo sapiens OX=9606 GN=VCL PE=1 SV=4	QDLLAKC(BTD[C])DR|QDLLAKC(BTD[C])DR	3|3	1.02|1.04	1.03	0.01414	6	2
437	Q9BR76	332	CORO1B	COR1B_HUMAN Coronin-1B OS=Homo sapiens OX=9606 GN=CORO1B PE=1 SV=1	GLEVSKC(BTD[C])EIAR|GLEVSKC(BTD[C])EIAR	1|2	1.09|0.97	1.03	0.08485	3	2
438	P42330	193	AKR1C3	AK1C3_HUMAN Aldo-keto reductase family 1 member C3 OS=Homo sapiens OX=9606 GN=AKR1C3 PE=1 SV=4	PVCNQVEC(BTD[C])HPYFNR|	2|	1.03|	1.03	NA	2	1
439	P00558	50	PGK1	PGK1_HUMAN Phosphoglycerate kinase 1 OS=Homo sapiens OX=9606 GN=PGK1 PE=1 SV=3	KFC(BTD[C])LDNGAK FC(BTD[C])LDNGAK|	4|	1.03|	1.03	NA	4	1
440	P60866	36	RPS20	RS20_HUMAN 40S ribosomal protein S20 OS=Homo sapiens OX=9606 GN=RPS20 PE=1 SV=1	KVC(BTD[C])ADLIR|KVC(BTD[C])ADLIR VC(BTD[C])ADLIR	1|3	0.99|1.07	1.03	0.05657	4	2
441	Q01469	67	FABP5	FABP5_HUMAN Fatty acid-binding protein 5 OS=Homo sapiens OX=9606 GN=FABP5 PE=1 SV=3	TTQFSC(BTD[C])TLGEK|	2|	1.03|	1.03	NA	2	1
442	Q16401	412	PSMD5	PSMD5_HUMAN 26S proteasome non-ATPase regulatory subunit 5 OS=Homo sapiens OX=9606 GN=PSMD5 PE=1 SV=3	GISSQPFPELHC(BTD[C])AALK|	2|	1.03|	1.03	NA	2	1
443	P00558	367	PGK1	PGK1_HUMAN Phosphoglycerate kinase 1 OS=Homo sapiens OX=9606 GN=PGK1 PE=1 SV=3	GC(BTD[C])ITIIGGGDTATCCAK|	1|	1.03|	1.03	NA	1	1
444	P18669	153	PGAM1	PGAM1_HUMAN Phosphoglycerate mutase 1 OS=Homo sapiens OX=9606 GN=PGAM1 PE=1 SV=2	YADLTEDQLPSC(BTD[C])ESLKDTIAR|YADLTEDQLPSC(BTD[C])ESLK YADLTEDQLPSC(BTD[C])ESLKDTIAR	2|3	0.72|1.34	1.03	0.43841	5	2
445	P46821	261	MAP1B	MAP1B_HUMAN Microtubule-associated protein 1B OS=Homo sapiens OX=9606 GN=MAP1B PE=1 SV=2	|KPC(BTD[C])CYIFPGGR	|2	|1.03	1.03	NA	2	1
446	Q9NSE4	883	IARS2	SYIM_HUMAN Isoleucine--tRNA ligase, mitochondrial OS=Homo sapiens OX=9606 GN=IARS2 PE=1 SV=2	|KPGLEEAVESAC(BTD[C])AMR	|2	|1.03	1.03	NA	2	1
447	O94973	330	AP2A2	AP2A2_HUMAN AP-2 complex subunit alpha-2 OS=Homo sapiens OX=9606 GN=AP2A2 PE=1 SV=2	|AC(BTD[C])NQLGQFLQHR	|3	|1.03	1.03	NA	3	1
448	Q13907	39	IDI1	IDI1_HUMAN Isopentenyl-diphosphate Delta-isomerase 1 OS=Homo sapiens OX=9606 GN=IDI1 PE=1 SV=2	KNC(BTD[C])HLNENIEK|KNC(BTD[C])HLNENIEK	2|3	1.06|0.99	1.025	0.0495	5	2
449	Q07955	16	SRSF1	SRSF1_HUMAN Serine/arginine-rich splicing factor 1 OS=Homo sapiens OX=9606 GN=SRSF1 PE=1 SV=2	PAGNNDC(BTD[C])R|GPAGNNDC(BTD[C])R	2|2	1.01|1.04	1.025	0.02121	4	2
450	Q96EI5	34	TCEAL4	TCAL4_HUMAN Transcription elongation factor A protein-like 4 OS=Homo sapiens OX=9606 GN=TCEAL4 PE=1 SV=2	KPEVTC(BTD[C])TLEDK|KPEVTC(BTD[C])TLEDK	1|1	1.14|0.91	1.025	0.16263	2	2
451	P35579	988	MYH9	MYH9_HUMAN Myosin-9 OS=Homo sapiens OX=9606 GN=MYH9 PE=1 SV=4	KLEEEQIILEDQNC(BTD[C])K LEEEQIILEDQNC(BTD[C])K|KLEEEQIILEDQNC(BTD[C])K LEEEQIILEDQNC(BTD[C])K	4|2	0.94|1.105	1.0225	0.11667	6	2
452	P51991	196	HNRNPA3	ROA3_HUMAN Heterogeneous nuclear ribonucleoprotein A3 OS=Homo sapiens OX=9606 GN=HNRNPA3 PE=1 SV=2	YHTINGHNC(BTD[C])EVK|	3|	1.02|	1.02	NA	3	1
453	Q9Y315	182	DERA	DEOC_HUMAN Deoxyribose-phosphate aldolase OS=Homo sapiens OX=9606 GN=DERA PE=1 SV=2	AC(BTD[C])GEAHLK KAC(BTD[C])GEAHLK|AC(BTD[C])GEAHLK KAC(BTD[C])GEAHLK	6|7	1.06|0.98	1.02	0.05657	13	2
454	O00231	289	PSMD11	PSD11_HUMAN 26S proteasome non-ATPase regulatory subunit 11 OS=Homo sapiens OX=9606 GN=PSMD11 PE=1 SV=3	QTEALKC(BTD[C])VAQASK|QTEALKC(BTD[C])VAQASK	3|3	1.0|1.04	1.02	0.02828	6	2
455	Q6IS14	73	EIF5AL1	IF5AL_HUMAN Eukaryotic translation initiation factor 5A-1-like OS=Homo sapiens OX=9606 GN=EIF5AL1 PE=2 SV=2	KYEDIC(BTD[C])PSTHNMDVPNIK YEDIC(BTD[C])PSTHNMDVPNIK|KYEDIC(BTD[C])PSTHNMDVPNIK YEDIC(BTD[C])PSTHNMDVPNIK	6|6	1.13|0.91	1.02	0.15556	12	2
456	Q9Y3B8	137	REXO2	ORN_HUMAN Oligoribonuclease, mitochondrial OS=Homo sapiens OX=9606 GN=REXO2 PE=1 SV=3	QQTPPGLC(BTD[C])PLAGNSVHEDKK QQTPPGLC(BTD[C])PLAGNSVHEDK|	2|	1.02|	1.02	NA	2	1
457	Q9UG63	161	ABCF2	ABCF2_HUMAN ATP-binding cassette sub-family F member 2 OS=Homo sapiens OX=9606 GN=ABCF2 PE=1 SV=2	TPLHC(BTD[C])VMEVDTER|TPLHC(BTD[C])VMEVDTER	2|1	0.9|1.14	1.02	0.16971	3	2
458	Q00610	459	CLTC	CLH1_HUMAN Clathrin heavy chain 1 OS=Homo sapiens OX=9606 GN=CLTC PE=1 SV=5	EDKLEC(BTD[C])SEELGDLVK LEC(BTD[C])SEELGDLVK|EDKLEC(BTD[C])SEELGDLVK	3|2	1.02|1.02	1.02	0	5	2
459	P40926	212	MDH2	MDHM_HUMAN Malate dehydrogenase, mitochondrial OS=Homo sapiens OX=9606 GN=MDH2 PE=1 SV=3	TIIPLISQC(BTD[C])TPK|TIIPLISQC(BTD[C])TPK	4|4	1.07|0.97	1.02	0.07071	8	2
460	P62140	21	PPP1CB	PP1B_HUMAN Serine/threonine-protein phosphatase PP1-beta catalytic subunit OS=Homo sapiens OX=9606 GN=PPP1CB PE=1 SV=3	GC(BTD[C])RPGK|GC(BTD[C])RPGK	1|1	1.04|1.0	1.02	0.02828	2	2
461	Q00341	566	HDLBP	VIGLN_HUMAN Vigilin OS=Homo sapiens OX=9606 GN=HDLBP PE=1 SV=2	NEVEKC(BTD[C])TK|	2|	1.02|	1.02	NA	2	1
462	Q5TDH0	332	DDI2	DDI2_HUMAN Protein DDI1 homolog 2 OS=Homo sapiens OX=9606 GN=DDI2 PE=1 SV=1	|HQC(BTD[C])SIDLK	|1	|1.02	1.02	NA	1	1
463	P78371	289	CCT2	TCPB_HUMAN T-complex protein 1 subunit beta OS=Homo sapiens OX=9606 GN=CCT2 PE=1 SV=4	|HGINC(BTD[C])FINR	|1	|1.02	1.02	NA	1	1
464	P38606	394	ATP6V1A	VATA_HUMAN V-type proton ATPase catalytic subunit A OS=Homo sapiens OX=9606 GN=ATP6V1A PE=1 SV=2	VKC(BTD[C])LGNPER|VKC(BTD[C])LGNPER	3|2	1.01|1.02	1.015	0.00707	5	2
465	P08708	35	RPS17	RS17_HUMAN 40S ribosomal protein S17 OS=Homo sapiens OX=9606 GN=RPS17 PE=1 SV=2	RVC(BTD[C])EEIAIIPSKK KRVC(BTD[C])EEIAIIPSK VC(BTD[C])EEIAIIPSKK VC(BTD[C])EEIAIIPSK|KRVC(BTD[C])EEIAIIPSK VC(BTD[C])EEIAIIPSKK RVC(BTD[C])EEIAIIPSK VC(BTD[C])EEIAIIPSK	8|9	1.02|1.01	1.015	0.00707	17	2
466	P46777	62	RPL5	RL5_HUMAN 60S ribosomal protein L5 OS=Homo sapiens OX=9606 GN=RPL5 PE=1 SV=3	IC(BTD[C])QIAYAR|IIC(BTD[C])QIAYAR	1|2	1.11|0.92	1.015	0.13435	3	2
467	O75369	991	FLNB	FLNB_HUMAN Filamin-B OS=Homo sapiens OX=9606 GN=FLNB PE=1 SV=2	VVPC(BTD[C])LVTPVTGR|VVPC(BTD[C])LVTPVTGR	2|2	0.59|1.44	1.015	0.60104	4	2
468	P09382	61	LGALS1	LEG1_HUMAN Galectin-1 OS=Homo sapiens OX=9606 GN=LGALS1 PE=1 SV=2	NAHGDANTIVC(BTD[C])NSK AHGDANTIVC(BTD[C])NSK HGDANTIVC(BTD[C])NSK FNAHGDANTIVC(BTD[C])NSK|NAHGDANTIVC(BTD[C])NSK AHGDANTIVC(BTD[C])NSK HGDANTIVC(BTD[C])NSK FNAHGDANTIVC(BTD[C])NSK	10|13	1.005|1.02	1.0125	0.01061	23	2
469	P00352	133	ALDH1A1	AL1A1_HUMAN Retinal dehydrogenase 1 OS=Homo sapiens OX=9606 GN=ALDH1A1 PE=1 SV=2	YC(BTD[C])AGWADK|YC(BTD[C])AGWADK	3|4	1.01|1.015	1.0125	0.00354	7	2
470	Q15075	255	EEA1	EEA1_HUMAN Early endosome antigen 1 OS=Homo sapiens OX=9606 GN=EEA1 PE=1 SV=2	LKDEC(BTD[C])K|	1|	1.01|	1.01	NA	1	1
471	Q02543	137	RPL18A	RL18A_HUMAN 60S ribosomal protein L18a OS=Homo sapiens OX=9606 GN=RPL18A PE=1 SV=2	VEEIAASKC(BTD[C])R|VEEIAASKC(BTD[C])R	2|1	1.08|0.94	1.01	0.09899	3	2
472	P78527	1904	PRKDC	PRKDC_HUMAN DNA-dependent protein kinase catalytic subunit OS=Homo sapiens OX=9606 GN=PRKDC PE=1 SV=3	INQVFHGSC(BTD[C])ITEGNELTK|INQVFHGSC(BTD[C])ITEGNELTK	2|2	1.04|0.98	1.01	0.04243	4	2
473	Q13616	752	CUL1	CUL1_HUMAN Cullin-1 OS=Homo sapiens OX=9606 GN=CUL1 PE=1 SV=2	KC(BTD[C])IDILIEK|	2|	1.01|	1.01	NA	2	1
474	Q15365	158	PCBP1	PCBP1_HUMAN Poly(rC)-binding protein 1 OS=Homo sapiens OX=9606 GN=PCBP1 PE=1 SV=2	AITIAGVPQSVTEC(BTD[C])VK|AITIAGVPQSVTEC(BTD[C])VK	2|3	0.91|1.11	1.01	0.14142	5	2
475	P62910	96	RPL32	RL32_HUMAN 60S ribosomal protein L32 OS=Homo sapiens OX=9606 GN=RPL32 PE=1 SV=2	|SYC(BTD[C])AEIAHNVSSK	|2	|1.01	1.01	NA	2	1
476	Q08257	166	CRYZ	QOR_HUMAN Quinone oxidoreductase OS=Homo sapiens OX=9606 GN=CRYZ PE=1 SV=1	|AGESVLVHGASGGVGLAAC(BTD[C])QIAR	|2	|1.01	1.01	NA	2	1
477	P50914	42	RPL14	RL14_HUMAN 60S ribosomal protein L14 OS=Homo sapiens OX=9606 GN=RPL14 PE=1 SV=4	DGPC(BTD[C])TQVR|VDGPC(BTD[C])TQVR	1|3	0.89|1.12	1.005	0.16263	4	2
478	P61158	408	ACTR3	ARP3_HUMAN Actin-related protein 3 OS=Homo sapiens OX=9606 GN=ACTR3 PE=1 SV=3	KDYEEIGPSIC(BTD[C])R|KDYEEIGPSIC(BTD[C])R	1|1	1.03|0.98	1.005	0.03536	2	2
479	Q9ULV4	420	CORO1C	COR1C_HUMAN Coronin-1C OS=Homo sapiens OX=9606 GN=CORO1C PE=1 SV=1	KC(BTD[C])DLISIPK|KC(BTD[C])DLISIPK	1|2	0.99|1.02	1.005	0.02121	3	2
480	P68104	411	EEF1A1	EF1A1_HUMAN Elongation factor 1-alpha 1 OS=Homo sapiens OX=9606 GN=EEF1A1 PE=1 SV=1	SGDAAIVDMVPGKPMC(BTD[C])VESFSDYPPLGR|SGDAAIVDMVPGKPMC(BTD[C])VESFSDYPPLGR	4|1	0.99|1.02	1.005	0.02121	5	2
481	P49368	213	CCT3	TCPG_HUMAN T-complex protein 1 subunit gamma OS=Homo sapiens OX=9606 GN=CCT3 PE=1 SV=4	IPGGIIEDSC(BTD[C])VLR|IPGGIIEDSC(BTD[C])VLR	1|2	0.87|1.14	1.005	0.19092	3	2
482	O15344	302	MID1	TRI18_HUMAN E3 ubiquitin-protein ligase Midline-1 OS=Homo sapiens OX=9606 GN=MID1 PE=1 SV=1	|LAQQIANC(BTD[C])K	|2	|1.005	1.005	NA	2	1
483	Q9BUQ8	677	DDX23	DDX23_HUMAN Probable ATP-dependent RNA helicase DDX23 OS=Homo sapiens OX=9606 GN=DDX23 PE=1 SV=3	KGC(BTD[C])DVLAK|KGC(BTD[C])DVLAK	5|2	0.99|1.015	1.0025	0.01768	7	2
484	P07910	46	HNRNPC	HNRPC_HUMAN Heterogeneous nuclear ribonucleoproteins C1/C2 OS=Homo sapiens OX=9606 GN=HNRNPC PE=1 SV=4	GC(BTD[C])SVHK IVGC(BTD[C])SVHK|	2|	1.0|	1	NA	2	1
485	Q13557	290	CAMK2D	KCC2D_HUMAN Calcium/calmodulin-dependent protein kinase type II subunit delta OS=Homo sapiens OX=9606 GN=CAMK2D PE=1 SV=3	QETVDC(BTD[C])LKK|QETVDC(BTD[C])LKK	1|1	1.06|0.94	1	0.08485	2	2
486	P09622	484	DLD	DLDH_HUMAN Dihydrolipoyl dehydrogenase, mitochondrial OS=Homo sapiens OX=9606 GN=DLD PE=1 SV=2	VC(BTD[C])HAHPTLSEAFR|	1|	1.0|	1	NA	1	1
487	Q9NZM1	435	MYOF	MYOF_HUMAN Myoferlin OS=Homo sapiens OX=9606 GN=MYOF PE=1 SV=1	FPSVC(BTD[C])EK|FPSVC(BTD[C])EK	1|1	1.03|0.97	1	0.04243	2	2
488	Q9Y490	2408	TLN1	TLN1_HUMAN Talin-1 OS=Homo sapiens OX=9606 GN=TLN1 PE=1 SV=3	MVAAATNNLC(BTD[C])EAANAAVQGHASQEK|	1|	1.0|	1	NA	1	1
489	P37108	56	SRP14	SRP14_HUMAN Signal recognition particle 14 kDa protein OS=Homo sapiens OX=9606 GN=SRP14 PE=1 SV=2	GTVEGFEPADNKC(BTD[C])LLR|FEPADNKC(BTD[C])LLR VEGFEPADNKC(BTD[C])LLR GTVEGFEPADNKC(BTD[C])LLR	2|4	0.96|1.04	1	0.05657	6	2
490	P31943	22	HNRNPH1	HNRH1_HUMAN Heterogeneous nuclear ribonucleoprotein H OS=Homo sapiens OX=9606 GN=HNRNPH1 PE=1 SV=4	LPWSC(BTD[C])SADEVQR|	2|	1.0|	1	NA	2	1
491	Q02543	64	RPL18A	RL18A_HUMAN 60S ribosomal protein L18a OS=Homo sapiens OX=9606 GN=RPL18A PE=1 SV=2	SGEIVYC(BTD[C])GQVFEK|	2|	1.0|	1	NA	2	1
492	A0A0B4J2D5	176	GATD3B	GAL3B_HUMAN Glutamine amidotransferase-like class 1 domain-containing protein 3B, mitochondrial OS=Homo sapiens OX=9606 GN=GATD3B PE=1 SV=1	EFHQAGKPIGLC(BTD[C])CIAPVLAAK|EFHQAGKPIGLC(BTD[C])CIAPVLAAK	1|1	0.92|1.08	1	0.11314	2	2
493	P60174	164	TPI1	TPIS_HUMAN Triosephosphate isomerase OS=Homo sapiens OX=9606 GN=TPI1 PE=1 SV=3	VAHALAEGLGVIAC(BTD[C])IGEK|VAHALAEGLGVIAC(BTD[C])IGEK	2|5	0.99|1.01	1	0.01414	7	2
494	Q9H9J2	53	MRPL44	RM44_HUMAN 39S ribosomal protein L44, mitochondrial OS=Homo sapiens OX=9606 GN=MRPL44 PE=1 SV=1	|LRC(BTD[C])PPPPVR	|2	|1.0	1	NA	2	1
495	O75832	107	PSMD10	PSD10_HUMAN 26S proteasome non-ATPase regulatory subunit 10 OS=Homo sapiens OX=9606 GN=PSMD10 PE=1 SV=1	|GAQVNAVNQNGC(BTD[C])TPLHYAASK	|2	|1.0	1	NA	2	1
496	P21333	483	FLNA	FLNA_HUMAN Filamin-A OS=Homo sapiens OX=9606 GN=FLNA PE=1 SV=4	|SPYTVTVGQACNPSAC(BTD[C])R	|2	|1.0	1	NA	2	1
497	P15121	304	AKR1B1	ALDR_HUMAN Aldo-keto reductase family 1 member B1 OS=Homo sapiens OX=9606 GN=AKR1B1 PE=1 SV=3	|VCALLSC(BTD[C])TSHK	|2	|1.0	1	NA	2	1
498	P06733	357	ENO1	ENOA_HUMAN Alpha-enolase OS=Homo sapiens OX=9606 GN=ENO1 PE=1 SV=2	|VNQIGSVTESIQAC(BTD[C])K	|2	|1.0	1	NA	2	1
499	P29401	468	TKT	TKT_HUMAN Transketolase OS=Homo sapiens OX=9606 GN=TKT PE=1 SV=3	|GIC(BTD[C])FIR	|1	|1.0	1	NA	1	1
500	Q08211	940	DHX9	DHX9_HUMAN ATP-dependent RNA helicase A OS=Homo sapiens OX=9606 GN=DHX9 PE=1 SV=4	|FC(BTD[C])EHKR	|1	|1.0	1	NA	1	1
501	Q09028	167	RBBP4	RBBP4_HUMAN Histone-binding protein RBBP4 OS=Homo sapiens OX=9606 GN=RBBP4 PE=1 SV=3	HPSKPDPSGEC(BTD[C])NPDLR|HPSKPDPSGEC(BTD[C])NPDLR	1|2	0.92|1.075	0.9975	0.1096	3	2
502	P23396	134	RPS3	RS3_HUMAN 40S ribosomal protein S3 OS=Homo sapiens OX=9606 GN=RPS3 PE=1 SV=2	GC(BTD[C])EVVVSGK|GC(BTD[C])EVVVSGK	2|1	0.895|1.1	0.9975	0.14496	3	2
503	P35579	91	MYH9	MYH9_HUMAN Myosin-9 OS=Homo sapiens OX=9606 GN=MYH9 PE=1 SV=4	VEDMAELTC(BTD[C])LNEASVLHNLK|VEDMAELTC(BTD[C])LNEASVLHNLK	2|1	1.055|0.94	0.9975	0.08132	3	2
504	P00390	467	GSR	GSHR_HUMAN Glutathione reductase, mitochondrial OS=Homo sapiens OX=9606 GN=GSR PE=1 SV=2	MVC(BTD[C])ANKEEK MVC(BTD[C])ANK|MVC(BTD[C])ANKEEK	13|5	1.06|0.93	0.995	0.09192	18	2
505	Q9NTK5	75	OLA1	OLA1_HUMAN Obg-like ATPase 1 OS=Homo sapiens OX=9606 GN=OLA1 PE=1 SV=2	FDFLC(BTD[C])QYHKPASK|FDFLC(BTD[C])QYHKPASK	1|1	1.1|0.89	0.995	0.14849	2	2
506	P09211	102	GSTP1	GSTP1_HUMAN Glutathione S-transferase P OS=Homo sapiens OX=9606 GN=GSTP1 PE=1 SV=2	DQQEAALVDMVNDGVEDLRC(BTD[C])K|DQQEAALVDMVNDGVEDLRC(BTD[C])K	2|2	1.07|0.92	0.995	0.10607	4	2
507	Q00610	617	CLTC	CLH1_HUMAN Clathrin heavy chain 1 OS=Homo sapiens OX=9606 GN=CLTC PE=1 SV=5	AHIAQLC(BTD[C])EK|AHIAQLC(BTD[C])EK	1|2	0.91|1.07	0.99	0.11314	3	2
508	Q8IUZ5	443	PHYKPL	AT2L2_HUMAN 5-phosphohydroxy-L-lysine phospho-lyase OS=Homo sapiens OX=9606 GN=PHYKPL PE=1 SV=1	SC(BTD[C])ETLR|	2|	0.99|	0.99	NA	2	1
509	P62244	30	RPS15A	RS15A_HUMAN 40S ribosomal protein S15a OS=Homo sapiens OX=9606 GN=RPS15A PE=1 SV=2	VLIRPC(BTD[C])SK QVLIRPC(BTD[C])SK|LIRPC(BTD[C])SK QVLIRPC(BTD[C])SK	3|3	1.01|0.97	0.99	0.02828	6	2
510	P84103	10	SRSF3	SRSF3_HUMAN Serine/arginine-rich splicing factor 3 OS=Homo sapiens OX=9606 GN=SRSF3 PE=1 SV=1	CPLDC(BTD[C])K|	1|	0.99|	0.99	NA	1	1
511	Q9Y2G9	1213	SBNO2	SBNO2_HUMAN Protein strawberry notch homolog 2 OS=Homo sapiens OX=9606 GN=SBNO2 PE=2 SV=3	IPEGC(BTD[C])VR|	1|	0.99|	0.99	NA	1	1
512	O15523	296	DDX3Y	DDX3Y_HUMAN ATP-dependent RNA helicase DDX3Y OS=Homo sapiens OX=9606 GN=DDX3Y PE=1 SV=2	VRPC(BTD[C])VVYGGADIGQQIR|	1|	0.99|	0.99	NA	1	1
513	O75369	455	FLNB	FLNB_HUMAN Filamin-B OS=Homo sapiens OX=9606 GN=FLNB PE=1 SV=2	SPFVVQVGEACNPNAC(BTD[C])R|	1|	0.99|	0.99	NA	1	1
514	P60174	79	TPI1	TPIS_HUMAN Triosephosphate isomerase OS=Homo sapiens OX=9606 GN=TPI1 PE=1 SV=3	VPADTEVVC(BTD[C])APPTAYIDFAR|	2|	0.99|	0.99	NA	2	1
515	P53618	235	COPB1	COPB_HUMAN Coatomer subunit beta OS=Homo sapiens OX=9606 GN=COPB1 PE=1 SV=3	|VC(BTD[C])HANPSER	|1	|0.99	0.99	NA	1	1
516	P22059	609	OSBP	OSBP1_HUMAN Oxysterol-binding protein 1 OS=Homo sapiens OX=9606 GN=OSBP PE=1 SV=1	|TGDKC(BTD[C])NLK	|1	|0.99	0.99	NA	1	1
517	Q06323	101	PSME1	PSME1_HUMAN Proteasome activator complex subunit 1 OS=Homo sapiens OX=9606 GN=PSME1 PE=1 SV=1	|KGEDEDKGPPC(BTD[C])GPVNCNEK	|1	|0.99	0.99	NA	1	1
518	Q96TA1	466	FAM129B	NIBL1_HUMAN Niban-like protein 1 OS=Homo sapiens OX=9606 GN=FAM129B PE=1 SV=3	|GPTKEELC(BTD[C])K	|1	|0.99	0.99	NA	1	1
519	Q99714	91	HSD17B10	HCD2_HUMAN 3-hydroxyacyl-CoA dehydrogenase type-2 OS=Homo sapiens OX=9606 GN=HSD17B10 PE=1 SV=3	|VDVAVNC(BTD[C])AGIAVASK	|3	|0.99	0.99	NA	3	1
520	P49327	1471	FASN	FAS_HUMAN Fatty acid synthase OS=Homo sapiens OX=9606 GN=FASN PE=1 SV=3	|LRC(BTD[C])VLLSNLSSTSHVPEVDPGSAELQK	|1	|0.99	0.99	NA	1	1
521	Q99436	74	PSMB7	PSB7_HUMAN Proteasome subunit beta type-7 OS=Homo sapiens OX=9606 GN=PSMB7 PE=1 SV=1	ATEGMVVADKNC(BTD[C])SK|ATEGMVVADKNC(BTD[C])SK	2|2	1.03|0.94	0.985	0.06364	4	2
522	Q9Y490	1087	TLN1	TLN1_HUMAN Talin-1 OS=Homo sapiens OX=9606 GN=TLN1 PE=1 SV=3	LKPLPGETMEKC(BTD[C])TQDLGNSTK|LKPLPGETMEKC(BTD[C])TQDLGNSTK	4|1	0.95|1.02	0.985	0.0495	5	2
523	P17812	491	CTPS1	PYRG1_HUMAN CTP synthase 1 OS=Homo sapiens OX=9606 GN=CTPS1 PE=1 SV=2	KC(BTD[C])LEEQGLK|	2|	0.985|	0.985	NA	2	1
524	P49588	773	AARS	SYAC_HUMAN Alanine--tRNA ligase, cytoplasmic OS=Homo sapiens OX=9606 GN=AARS PE=1 SV=2	KC(BTD[C])LSVMEAK|KC(BTD[C])LSVMEAK	1|4	0.97|1.0	0.985	0.02121	5	2
525	P60174	104	TPI1	TPIS_HUMAN Triosephosphate isomerase OS=Homo sapiens OX=9606 GN=TPI1 PE=1 SV=3	IAVAAQNC(BTD[C])YK|IAVAAQNC(BTD[C])YK	2|3	1.02|0.95	0.985	0.0495	5	2
526	P62280	131	RPS11	RS11_HUMAN 40S ribosomal protein S11 OS=Homo sapiens OX=9606 GN=RPS11 PE=1 SV=3	DVQIGDIVTVGEC(BTD[C])R|DVQIGDIVTVGEC(BTD[C])R	2|2	0.86|1.11	0.985	0.17678	4	2
527	P55060	842	CSE1L	XPO2_HUMAN Exportin-2 OS=Homo sapiens OX=9606 GN=CSE1L PE=1 SV=3	KIC(BTD[C])AVGITK|KIC(BTD[C])AVGITK	2|2	0.815|1.145	0.98	0.23335	4	2
528	O76021	47	RSL1D1	RL1D1_HUMAN Ribosomal L1 domain-containing protein 1 OS=Homo sapiens OX=9606 GN=RSL1D1 PE=1 SV=3	VDALLTHC(BTD[C])K|	2|	0.98|	0.98	NA	2	1
529	Q15008	58	PSMD6	PSMD6_HUMAN 26S proteasome non-ATPase regulatory subunit 6 OS=Homo sapiens OX=9606 GN=PSMD6 PE=1 SV=1	APYYEALC(BTD[C])K|	1|	0.98|	0.98	NA	1	1
530	Q9Y315	118	DERA	DEOC_HUMAN Deoxyribose-phosphate aldolase OS=Homo sapiens OX=9606 GN=DERA PE=1 SV=2	AAGC(BTD[C])NIPVASVAAGFPAGQTHLK|AAGC(BTD[C])NIPVASVAAGFPAGQTHLK	2|2	1.11|0.85	0.98	0.18385	4	2
531	P28066	47	PSMA5	PSA5_HUMAN Proteasome subunit alpha type-5 OS=Homo sapiens OX=9606 GN=PSMA5 PE=1 SV=3	LGSTAIGIQTSEGVC(BTD[C])LAVEK|	1|	0.98|	0.98	NA	1	1
532	Q99460	633	PSMD1	PSMD1_HUMAN 26S proteasome non-ATPase regulatory subunit 1 OS=Homo sapiens OX=9606 GN=PSMD1 PE=1 SV=2	TPEQC(BTD[C])PSVVSLLSESYNPHVR|TPEQC(BTD[C])PSVVSLLSESYNPHVR	2|1	1.1|0.86	0.98	0.16971	3	2
533	P62191	58	PSMC1	PRS4_HUMAN 26S proteasome regulatory subunit 4 OS=Homo sapiens OX=9606 GN=PSMC1 PE=1 SV=1	TPHTQC(BTD[C])R|LPLVTPHTQC(BTD[C])R	1|2	0.95|1.01	0.98	0.04243	3	2
534	O94973	491	AP2A2	AP2A2_HUMAN AP-2 complex subunit alpha-2 OS=Homo sapiens OX=9606 GN=AP2A2 PE=1 SV=2	|TVFEALQAPAC(BTD[C])HENLVK	|1	|0.98	0.98	NA	1	1
535	P60174	124	TPI1	TPIS_HUMAN Triosephosphate isomerase OS=Homo sapiens OX=9606 GN=TPI1 PE=1 SV=3	|DC(BTD[C])GATWVVLGHSER	|1	|0.98	0.98	NA	1	1
536	Q14247	112	CTTN	SRC8_HUMAN Src substrate cortactin OS=Homo sapiens OX=9606 GN=CTTN PE=1 SV=2	HC(BTD[C])SQVDSVR|HC(BTD[C])SQVDSVR	2|2	0.98|0.97	0.975	0.00707	4	2
537	P21333	1165	FLNA	FLNA_HUMAN Filamin-A OS=Homo sapiens OX=9606 GN=FLNA PE=1 SV=4	VKC(BTD[C])SGPGLER|VKC(BTD[C])SGPGLER	2|1	0.95|1.0	0.975	0.03536	3	2
538	P63244	207	RACK1	RACK1_HUMAN Receptor of activated protein C kinase 1 OS=Homo sapiens OX=9606 GN=RACK1 PE=1 SV=3	TNHIGHTGYLNTVTVSPDGSLC(BTD[C])ASGGK|TNHIGHTGYLNTVTVSPDGSLC(BTD[C])ASGGK	1|1	1.0|0.95	0.975	0.03536	2	2
539	Q03154	49	ACY1	ACY1_HUMAN Aminoacylase-1 OS=Homo sapiens OX=9606 GN=ACY1 PE=1 SV=1	LGLGC(BTD[C])QK|LGLGC(BTD[C])QK	1|1	1.02|0.93	0.975	0.06364	2	2
540	P63244	168	RACK1	RACK1_HUMAN Receptor of activated protein C kinase 1 OS=Homo sapiens OX=9606 GN=RACK1 PE=1 SV=3	FSPNSSNPIIVSC(BTD[C])GWDK|FSPNSSNPIIVSC(BTD[C])GWDK	2|2	1.12|0.83	0.975	0.20506	4	2
541	Q9GZT9	127	EGLN1	EGLN1_HUMAN Egl nine homolog 1 OS=Homo sapiens OX=9606 GN=EGLN1 PE=1 SV=1	AKPPADPAAAASPC(BTD[C])R|AKPPADPAAAASPC(BTD[C])R	2|3	0.975|0.97	0.9725	0.00354	5	2
542	P82673	123	MRPS35	RT35_HUMAN 28S ribosomal protein S35, mitochondrial OS=Homo sapiens OX=9606 GN=MRPS35 PE=1 SV=1	HC(BTD[C])EALK|HC(BTD[C])EALK	2|1	0.94|1.0	0.97	0.04243	3	2
543	Q15149	1156	PLEC	PLEC_HUMAN Plectin OS=Homo sapiens OX=9606 GN=PLEC PE=1 SV=3	LPLDKEPAREC(BTD[C])AQR|LPLDKEPAREC(BTD[C])AQR	2|1	1.13|0.81	0.97	0.22627	3	2
544	Q13404	71	UBE2V1	UB2V1_HUMAN Ubiquitin-conjugating enzyme E2 variant 1 OS=Homo sapiens OX=9606 GN=UBE2V1 PE=1 SV=2	IEC(BTD[C])GPK|IEC(BTD[C])GPK	3|3	1.03|0.91	0.97	0.08485	6	2
545	Q14980	1367	NUMA1	NUMA1_HUMAN Nuclear mitotic apparatus protein 1 OS=Homo sapiens OX=9606 GN=NUMA1 PE=1 SV=2	HLC(BTD[C])QQLQAEQAAAEK|HLC(BTD[C])QQLQAEQAAAEK	2|3	0.99|0.95	0.97	0.02828	5	2
546	O00410	972	IPO5	IPO5_HUMAN Importin-5 OS=Homo sapiens OX=9606 GN=IPO5 PE=1 SV=4	TKENVNATENC(BTD[C])ISAVGK|	2|	0.97|	0.97	NA	2	1
547	Q9H2W6	52	MRPL46	RM46_HUMAN 39S ribosomal protein L46, mitochondrial OS=Homo sapiens OX=9606 GN=MRPL46 PE=1 SV=1	GALC(BTD[C])LQRPPVVSK|	1|	0.97|	0.97	NA	1	1
548	P35244	26	RPA3	RFA3_HUMAN Replication protein A 14 kDa subunit OS=Homo sapiens OX=9606 GN=RPA3 PE=1 SV=1	IDKPVC(BTD[C])FVGR|	1|	0.97|	0.97	NA	1	1
549	Q13162	245	PRDX4	PRDX4_HUMAN Peroxiredoxin-4 OS=Homo sapiens OX=9606 GN=PRDX4 PE=1 SV=1	HGEVC(BTD[C])PAGWKPGSETIIPDPAGK|	2|	0.97|	0.97	NA	2	1	Disulfide bond
550	P78527	3837	PRKDC	PRKDC_HUMAN DNA-dependent protein kinase catalytic subunit OS=Homo sapiens OX=9606 GN=PRKDC PE=1 SV=3	APPC(BTD[C])EYKDWLTK|APPC(BTD[C])EYKDWLTK	1|1	1.08|0.86	0.97	0.15556	2	2
551	P63167	56	DYNLL1	DYL1_HUMAN Dynein light chain 1, cytoplasmic OS=Homo sapiens OX=9606 GN=DYNLL1 PE=1 SV=1	NPTWHC(BTD[C])IVGR PTWHC(BTD[C])IVGR YNPTWHC(BTD[C])IVGR|HC(BTD[C])IVGR NPTWHC(BTD[C])IVGR YNPTWHC(BTD[C])IVGR	8|5	1.13|0.81	0.97	0.22627	13	2
552	P39687	87	ANP32A	AN32A_HUMAN Acidic leucine-rich nuclear phosphoprotein 32 family member A OS=Homo sapiens OX=9606 GN=ANP32A PE=1 SV=1	VSGGLEVLAEKC(BTD[C])PNLTHLNLSGNK|	3|	0.97|	0.97	NA	3	1
553	Q9NRX1	64	PNO1	PNO1_HUMAN RNA-binding protein PNO1 OS=Homo sapiens OX=9606 GN=PNO1 PE=1 SV=1	RPVFPPLC(BTD[C])GDGLLSGK|	2|	0.97|	0.97	NA	2	1
554	P22102	168	GART	PUR2_HUMAN Trifunctional purine biosynthetic protein adenosine-3 OS=Homo sapiens OX=9606 GN=GART PE=1 SV=1	SKEEAC(BTD[C])K|	1|	0.97|	0.97	NA	1	1
555	P09211	15	GSTP1	GSTP1_HUMAN Glutathione S-transferase P OS=Homo sapiens OX=9606 GN=GSTP1 PE=1 SV=2	|GRC(BTD[C])AALR	|4	|0.97	0.97	NA	4	1
556	Q9NQC3	1101	RTN4	RTN4_HUMAN Reticulon-4 OS=Homo sapiens OX=9606 GN=RTN4 PE=1 SV=2	|YSNSALGHVNC(BTD[C])TIK	|3	|0.97	0.97	NA	3	1
557	P04040	232	CAT	CATA_HUMAN Catalase OS=Homo sapiens OX=9606 GN=CAT PE=1 SV=3	|LVNANGEAVYC(BTD[C])K	|2	|0.97	0.97	NA	2	1
558	Q9NPH2	485	ISYNA1	INO1_HUMAN Inositol-3-phosphate synthase 1 OS=Homo sapiens OX=9606 GN=ISYNA1 PE=1 SV=1	|SC(BTD[C])IENILR	|2	|0.97	0.97	NA	2	1
559	O75369	2115	FLNB	FLNB_HUMAN Filamin-B OS=Homo sapiens OX=9606 GN=FLNB PE=1 SV=2	|APSVATVGSIC(BTD[C])DLNLK	|3	|0.97	0.97	NA	3	1
560	Q9Y265	49	RUVBL1	RUVB1_HUMAN RuvB-like 1 OS=Homo sapiens OX=9606 GN=RUVBL1 PE=1 SV=1	|AC(BTD[C])GVIVELIK	|2	|0.97	0.97	NA	2	1
561	Q9UBI6	43	GNG12	GBG12_HUMAN Guanine nucleotide-binding protein G(I)/G(S)/G(O) subunit gamma-12 OS=Homo sapiens OX=9606 GN=GNG12 PE=1 SV=3	YC(BTD[C])EEHAR|YC(BTD[C])EEHAR	3|2	0.91|1.02	0.965	0.07778	5	2
562	Q06830	173	PRDX1	PRDX1_HUMAN Peroxiredoxin-1 OS=Homo sapiens OX=9606 GN=PRDX1 PE=1 SV=1	HGEVC(BTD[C])PAGWKPGSDTIKPDVQK|HGEVC(BTD[C])PAGWKPGSDTIKPDVQK	2|3	1.08|0.85	0.965	0.16263	5	2	Disulfide bond
563	P16615	997	ATP2A2	AT2A2_HUMAN Sarcoplasmic/endoplasmic reticulum calcium ATPase 2 OS=Homo sapiens OX=9606 GN=ATP2A2 PE=1 SV=1	NYLEPGKEC(BTD[C])VQPATK|	2|	0.965|	0.965	NA	2	1
564	P39023	336	RPL3	RL3_HUMAN 60S ribosomal protein L3 OS=Homo sapiens OX=9606 GN=RPL3 PE=1 SV=2	GC(BTD[C])VVGTK|GC(BTD[C])VVGTK	1|1	0.99|0.94	0.965	0.03536	2	2
565	P43304	285	GPD2	GPDM_HUMAN Glycerol-3-phosphate dehydrogenase, mitochondrial OS=Homo sapiens OX=9606 GN=GPD2 PE=1 SV=3	|AKC(BTD[C])VINATGPFTDSVR	|4	|0.965	0.965	NA	4	1
566	Q9HBI6	354	CYP4F11	CP4FB_HUMAN Phylloquinone omega-hydroxylase CYP4F11 OS=Homo sapiens OX=9606 GN=CYP4F11 PE=1 SV=3	HPEYQEQC(BTD[C])R|HPEYQEQC(BTD[C])R	1|2	0.97|0.955	0.9625	0.01061	3	2
567	P49721	163	PSMB2	PSB2_HUMAN Proteasome subunit beta type-2 OS=Homo sapiens OX=9606 GN=PSMB2 PE=1 SV=1	KC(BTD[C])LEELQK|KC(BTD[C])LEELQK	2|2	0.925|1.0	0.9625	0.05303	4	2
568	O43414	313	ERI3	ERI3_HUMAN ERI1 exoribonuclease 3 OS=Homo sapiens OX=9606 GN=ERI3 PE=1 SV=2	PHSGIDDC(BTD[C])K|	1|	0.96|	0.96	NA	1	1
569	Q14103	252	HNRNPD	HNRPD_HUMAN Heterogeneous nuclear ribonucleoprotein D0 OS=Homo sapiens OX=9606 GN=HNRNPD PE=1 SV=1	YHNVGLSKC(BTD[C])EIK|YHNVGLSKC(BTD[C])EIK	4|2	0.94|0.98	0.96	0.02828	6	2
570	Q969U7	103	PSMG2	PSMG2_HUMAN Proteasome assembly chaperone 2 OS=Homo sapiens OX=9606 GN=PSMG2 PE=1 SV=1	SKPFC(BTD[C])EK|	2|	0.96|	0.96	NA	2	1
571	P38646	608	HSPA9	GRP75_HUMAN Stress-70 protein, mitochondrial OS=Homo sapiens OX=9606 GN=HSPA9 PE=1 SV=2	DQLPADEC(BTD[C])NKLK MEEFKDQLPADEC(BTD[C])NKLK|MEEFKDQLPADEC(BTD[C])NKLK	5|3	1.02|0.9	0.96	0.08485	8	2
572	Q8TBC4	249	UBA3	UBA3_HUMAN NEDD8-activating enzyme E1 catalytic subunit OS=Homo sapiens OX=9606 GN=UBA3 PE=1 SV=2	LPEHC(BTD[C])IEYVR|	1|	0.96|	0.96	NA	1	1
573	P10620	50	MGST1	MGST1_HUMAN Microsomal glutathione S-transferase 1 OS=Homo sapiens OX=9606 GN=MGST1 PE=1 SV=1	KVFANPEDC(BTD[C])VAFGK FANPEDC(BTD[C])VAFGK|KVFANPEDC(BTD[C])VAFGK	3|1	0.9|1.02	0.96	0.08485	4	2
574	Q01082	1970	SPTBN1	SPTB2_HUMAN Spectrin beta chain, non-erythrocytic 1 OS=Homo sapiens OX=9606 GN=SPTBN1 PE=1 SV=2	NDSFTTC(BTD[C])IELGK|	1|	0.96|	0.96	NA	1	1
575	O60841	635	EIF5B	IF2P_HUMAN Eukaryotic translation initiation factor 5B OS=Homo sapiens OX=9606 GN=EIF5B PE=1 SV=4	APIIC(BTD[C])VLGHVDTGK|	2|	0.96|	0.96	NA	2	1
576	P52209	171	PGD	6PGD_HUMAN 6-phosphogluconate dehydrogenase, decarboxylating OS=Homo sapiens OX=9606 GN=PGD PE=1 SV=3	|VGTGEPCC(BTD[C])DWVGDEGAGHFVK	|3	|0.96	0.96	NA	3	1
577	Q99497	46	PARK7	PARK7_HUMAN Protein/nucleic acid deglycase DJ-1 OS=Homo sapiens OX=9606 GN=PARK7 PE=1 SV=2	TVAGLAGKDPVQC(BTD[C])SR|DPVQC(BTD[C])SR	2|2	0.85|1.065	0.9575	0.15203	4	2
578	Q99497	53	PARK7	PARK7_HUMAN Protein/nucleic acid deglycase DJ-1 OS=Homo sapiens OX=9606 GN=PARK7 PE=1 SV=2	DVVIC(BTD[C])PDASLEDAKK|VVIC(BTD[C])PDASLEDAKK DVVIC(BTD[C])PDASLEDAKK	2|2	1.05|0.865	0.9575	0.13081	4	2
579	Q96QK1	286	VPS35	VPS35_HUMAN Vacuolar protein sorting-associated protein 35 OS=Homo sapiens OX=9606 GN=VPS35 PE=1 SV=2	AC(BTD[C])AELHQNVNVK|AC(BTD[C])AELHQNVNVK	2|2	0.81|1.1	0.955	0.20506	4	2
580	P21333	1453	FLNA	FLNA_HUMAN Filamin-A OS=Homo sapiens OX=9606 GN=FLNA PE=1 SV=4	VKC(BTD[C])SGPGLSPGMVR|VKC(BTD[C])SGPGLSPGMVR	1|3	0.73|1.18	0.955	0.3182	4	2
581	P27816	654	MAP4	MAP4_HUMAN Microtubule-associated protein 4 OS=Homo sapiens OX=9606 GN=MAP4 PE=1 SV=3	KPC(BTD[C])NSQPSELSSETSGIAR KPC(BTD[C])NSQPSELSSETSGIARPEEGRPVVSGTGNDITTPPNK|KPC(BTD[C])NSQPSELSSETSGIAR KPC(BTD[C])NSQPSELSSETSGIARPEEGRPVVSGTGNDITTPPNK	2|3	0.975|0.93	0.9525	0.03182	5	2
582	Q16643	98	DBN1	DREB_HUMAN Drebrin OS=Homo sapiens OX=9606 GN=DBN1 PE=1 SV=4	CAC(BTD[C])ASHVAK|	3|	0.95|	0.95	NA	3	1
583	Q15637	171	SF1	SF01_HUMAN Splicing factor 1 OS=Homo sapiens OX=9606 GN=SF1 PE=1 SV=4	NIEKEC(BTD[C])NAK|NIEKEC(BTD[C])NAK	1|3	0.9|1.0	0.95	0.07071	4	2
584	P60903	62	S100A10	S10AA_HUMAN Protein S100-A10 OS=Homo sapiens OX=9606 GN=S100A10 PE=1 SV=2	KDLDQC(BTD[C])R DLDQC(BTD[C])R|	3|	0.95|	0.95	NA	3	1
585	P23528	147	CFL1	COF1_HUMAN Cofilin-1 OS=Homo sapiens OX=9606 GN=CFL1 PE=1 SV=3	DRC(BTD[C])TLAEK HELQANCYEEVKDRC(BTD[C])TLAEK|DRC(BTD[C])TLAEK HELQANCYEEVKDRC(BTD[C])TLAEK	9|9	0.96|0.94	0.95	0.01414	18	2
586	O75369	416	FLNB	FLNB_HUMAN Filamin-B OS=Homo sapiens OX=9606 GN=FLNB PE=1 SV=2	C(BTD[C])VYKPMQPGPHVVK|C(BTD[C])VYKPMQPGPHVVK	2|1	1.06|0.84	0.95	0.15556	3	2
587	Q02790	107	FKBP4	FKBP4_HUMAN Peptidyl-prolyl cis-trans isomerase FKBP4 OS=Homo sapiens OX=9606 GN=FKBP4 PE=1 SV=3	VGEVCHITC(BTD[C])KPEYAYGSAGSPPK|	1|	0.95|	0.95	NA	1	1
588	Q8IY17	991	PNPLA6	PLPL6_HUMAN Neuropathy target esterase OS=Homo sapiens OX=9606 GN=PNPLA6 PE=1 SV=3	GC(BTD[C])SHIGVLK|	1|	0.95|	0.95	NA	1	1
589	P35579	172	MYH9	MYH9_HUMAN Myosin-9 OS=Homo sapiens OX=9606 GN=MYH9 PE=1 SV=4	EDQSILC(BTD[C])TGESGAGK|	1|	0.95|	0.95	NA	1	1
590	P00558	316	PGK1	PGK1_HUMAN Phosphoglycerate kinase 1 OS=Homo sapiens OX=9606 GN=PGK1 PE=1 SV=3	TGQATVASGIPAGWMGLDC(BTD[C])GPESSKK TGQATVASGIPAGWMGLDC(BTD[C])GPESSK|TGQATVASGIPAGWMGLDC(BTD[C])GPESSKK	5|1	1.04|0.86	0.95	0.12728	6	2
591	Q9UBT2	185	UBA2	SAE2_HUMAN SUMO-activating enzyme subunit 2 OS=Homo sapiens OX=9606 GN=UBA2 PE=1 SV=2	NTPSEPIHC(BTD[C])IVWAK|NTPSEPIHC(BTD[C])IVWAK	1|1	1.03|0.87	0.95	0.11314	2	2
592	O95793	523	STAU1	STAU1_HUMAN Double-stranded RNA-binding protein Staufen homolog 1 OS=Homo sapiens OX=9606 GN=STAU1 PE=1 SV=2	NEFVSLINC(BTD[C])SSQPPLISHGIGK|	1|	0.95|	0.95	NA	1	1
593	Q9BZG1	38	RAB34	RAB34_HUMAN Ras-related protein Rab-34 OS=Homo sapiens OX=9606 GN=RAB34 PE=1 SV=1	TC(BTD[C])ACQEHR|TC(BTD[C])ACQEHR	4|3	0.87|1.03	0.95	0.11314	7	2
594	P43246	873	MSH2	MSH2_HUMAN DNA mismatch repair protein Msh2 OS=Homo sapiens OX=9606 GN=MSH2 PE=1 SV=1	|KC(BTD[C])YLER	|1	|0.95	0.95	NA	1	1
595	Q2VIR3	269	EIF2S3B	IF2GL_HUMAN Eukaryotic translation initiation factor 2 subunit 3B OS=Homo sapiens OX=9606 GN=EIF2S3B PE=2 SV=2	|SFDVNKPGC(BTD[C])EVDDLKGGVAGGSILK	|2	|0.95	0.95	NA	2	1
596	P15880	229	RPS2	RS2_HUMAN 40S ribosomal protein S2 OS=Homo sapiens OX=9606 GN=RPS2 PE=1 SV=2	|GC(BTD[C])TATLGNFAK	|2	|0.95	0.95	NA	2	1
597	Q8N1G4	390	LRRC47	LRC47_HUMAN Leucine-rich repeat-containing protein 47 OS=Homo sapiens OX=9606 GN=LRRC47 PE=1 SV=1	|GPLLYC(BTD[C])ARPPQDLK	|2	|0.95	0.95	NA	2	1
598	P62280	60	RPS11	RS11_HUMAN 40S ribosomal protein S11 OS=Homo sapiens OX=9606 GN=RPS11 PE=1 SV=3	KC(BTD[C])PFTGNVSIR|KC(BTD[C])PFTGNVSIR	4|2	0.94|0.955	0.9475	0.01061	6	2
599	P21333	2543	FLNA	FLNA_HUMAN Filamin-A OS=Homo sapiens OX=9606 GN=FLNA PE=1 SV=4	ATC(BTD[C])APQHGAPGPGPADASK|ATC(BTD[C])APQHGAPGPGPADASK	1|1	0.93|0.96	0.945	0.02121	2	2
600	Q00610	870	CLTC	CLH1_HUMAN Clathrin heavy chain 1 OS=Homo sapiens OX=9606 GN=CLTC PE=1 SV=5	IHEGC(BTD[C])EEPATHNALAK|IHEGC(BTD[C])EEPATHNALAK	2|1	0.93|0.96	0.945	0.02121	3	2
601	P62979	149	RPS27A	RS27A_HUMAN Ubiquitin-40S ribosomal protein S27a OS=Homo sapiens OX=9606 GN=RPS27A PE=1 SV=2	CCLTYC(BTD[C])FNKPEDK|	4|	0.945|	0.945	NA	4	1
602	Q96KP4	205	CNDP2	CNDP2_HUMAN Cytosolic non-specific dipeptidase OS=Homo sapiens OX=9606 GN=CNDP2 PE=1 SV=2	KPC(BTD[C])ITYGLR|KPC(BTD[C])ITYGLR	4|2	1.055|0.83	0.9425	0.1591	6	2
603	P04083	263	ANXA1	ANXA1_HUMAN Annexin A1 OS=Homo sapiens OX=9606 GN=ANXA1 PE=1 SV=2	GDIEKC(BTD[C])LTAIVK|GDIEKC(BTD[C])LTAIVK	2|4	0.92|0.965	0.9425	0.03182	6	2
604	O14936	132	CASK	CSKP_HUMAN Peripheral plasma membrane protein CASK OS=Homo sapiens OX=9606 GN=CASK PE=1 SV=3	YC(BTD[C])HDNNIIHR|	1|	0.94|	0.94	NA	1	1
605	Q9NRL3	713	STRN4	STRN4_HUMAN Striatin-4 OS=Homo sapiens OX=9606 GN=STRN4 PE=1 SV=2	TC(BTD[C])VQEITAHR|TC(BTD[C])VQEITAHR	1|2	0.82|1.06	0.94	0.16971	3	2
606	P83731	36	RPL24	RL24_HUMAN 60S ribosomal protein L24 OS=Homo sapiens OX=9606 GN=RPL24 PE=1 SV=1	AKC(BTD[C])ESAFLSK|AKC(BTD[C])ESAFLSK	3|1	0.96|0.92	0.94	0.02828	4	2
607	P22626	50	HNRNPA2B1	ROA2_HUMAN Heterogeneous nuclear ribonucleoproteins A2/B1 OS=Homo sapiens OX=9606 GN=HNRNPA2B1 PE=1 SV=2	LTDC(BTD[C])VVMRDPASK|LTDC(BTD[C])VVMRDPASK	1|1	0.94|0.94	0.94	0	2	2
608	P40429	38	RPL13A	RL13A_HUMAN 60S ribosomal protein L13a OS=Homo sapiens OX=9606 GN=RPL13A PE=1 SV=2	RC(BTD[C])EGINISGNFYR|RC(BTD[C])EGINISGNFYR	1|1	0.78|1.1	0.94	0.22627	2	2
609	P51858	12	HDGF	HDGF_HUMAN Hepatoma-derived growth factor OS=Homo sapiens OX=9606 GN=HDGF PE=1 SV=1	YKC(BTD[C])GDLVFAK|	1|	0.94|	0.94	NA	1	1	Disulfide bond
610	P83731	6	RPL24	RL24_HUMAN 60S ribosomal protein L24 OS=Homo sapiens OX=9606 GN=RPL24 PE=1 SV=1	LC(BTD[C])SFSGYK|	1|	0.94|	0.94	NA	1	1
611	Q9Y6C9	79	MTCH2	MTCH2_HUMAN Mitochondrial carrier homolog 2 OS=Homo sapiens OX=9606 GN=MTCH2 PE=1 SV=1	LC(BTD[C])SGVLGTVVHGK|	1|	0.94|	0.94	NA	1	1
612	P13639	369	EEF2	EF2_HUMAN Elongation factor 2 OS=Homo sapiens OX=9606 GN=EEF2 PE=1 SV=4	YRC(BTD[C])ELLYEGPPDDEAAMGIK|	2|	0.94|	0.94	NA	2	1
613	P19367	628	HK1	HXK1_HUMAN Hexokinase-1 OS=Homo sapiens OX=9606 GN=HK1 PE=1 SV=3	ATDC(BTD[C])VGHDVVTLLR|	1|	0.94|	0.94	NA	1	1
614	Q12906	203	ILF3	ILF3_HUMAN Interleukin enhancer-binding factor 3 OS=Homo sapiens OX=9606 GN=ILF3 PE=1 SV=3	|QKC(BTD[C])LAALASLR	|2	|0.94	0.94	NA	2	1
615	P55036	37	PSMD4	PSMD4_HUMAN 26S proteasome non-ATPase regulatory subunit 4 OS=Homo sapiens OX=9606 GN=PSMD4 PE=1 SV=1	LQAQQDAVNIVC(BTD[C])HSK|LQAQQDAVNIVC(BTD[C])HSK	2|1	0.96|0.91	0.935	0.03536	3	2
616	Q86WA6	234	BPHL	BPHL_HUMAN Valacyclovir hydrolase OS=Homo sapiens OX=9606 GN=BPHL PE=1 SV=1	VQC(BTD[C])PALIVHGEKDPLVPR|VQC(BTD[C])PALIVHGEKDPLVPR	2|1	0.93|0.94	0.935	0.00707	3	2
617	P16152	122	CBR1	CBR1_HUMAN Carbonyl reductase [NADPH] 1 OS=Homo sapiens OX=9606 GN=CBR1 PE=1 SV=3	DVC(BTD[C])TELLPLIKPQGR|DVC(BTD[C])TELLPLIKPQGR	1|2	0.83|1.04	0.935	0.14849	3	2
618	Q9Y490	1509	TLN1	TLN1_HUMAN Talin-1 OS=Homo sapiens OX=9606 GN=TLN1 PE=1 SV=3	HTSALCNSC(BTD[C])R|HTSALCNSC(BTD[C])R	2|2	0.965|0.9	0.9325	0.04596	4	2
619	Q9H832	263	UBE2Z	UBE2Z_HUMAN Ubiquitin-conjugating enzyme E2 Z OS=Homo sapiens OX=9606 GN=UBE2Z PE=1 SV=2	CPC(BTD[C])PEPLR|	3|	0.93|	0.93	NA	3	1
620	P63244	153	RACK1	RACK1_HUMAN Receptor of activated protein C kinase 1 OS=Homo sapiens OX=9606 GN=RACK1 PE=1 SV=3	YTVQDESHSEWVSC(BTD[C])VR|	2|	0.93|	0.93	NA	2	1
621	P49321	708	NASP	NASP_HUMAN Nuclear autoantigenic sperm protein OS=Homo sapiens OX=9606 GN=NASP PE=1 SV=2	KPTDGASSSNC(BTD[C])VTDISHLVR|	2|	0.93|	0.93	NA	2	1
622	P62879	25	GNB2	GBB2_HUMAN Guanine nucleotide-binding protein G(I)/G(S)/G(T) subunit beta-2 OS=Homo sapiens OX=9606 GN=GNB2 PE=1 SV=3	KAC(BTD[C])GDSTLTQITAGLDPVGR|	1|	0.93|	0.93	NA	1	1
623	P15313	201	ATP6V1B1	VATB1_HUMAN V-type proton ATPase subunit B, kidney isoform OS=Homo sapiens OX=9606 GN=ATP6V1B1 PE=1 SV=3	IPIFSAAGLPHNEIAAQIC(BTD[C])R|IPIFSAAGLPHNEIAAQIC(BTD[C])R	1|1	1.05|0.81	0.93	0.16971	2	2
624	Q96DI7	168	SNRNP40	SNR40_HUMAN U5 small nuclear ribonucleoprotein 40 kDa protein OS=Homo sapiens OX=9606 GN=SNRNP40 PE=1 SV=1	|RGPQLVC(BTD[C])TGSDDGTVK	|1	|0.93	0.93	NA	1	1
625	P27348	134	YWHAQ	1433T_HUMAN 14-3-3 protein theta OS=Homo sapiens OX=9606 GN=YWHAQ PE=1 SV=1	|YLAEVAC(BTD[C])GDDRK	|1	|0.93	0.93	NA	1	1
626	P0C617	324	OR5AL1	O5AL1_HUMAN Olfactory receptor 5AL1 OS=Homo sapiens OX=9606 GN=OR5AL1 PE=3 SV=1	|LC(BTD[C])LAVK	|1	|0.93	0.93	NA	1	1
627	Q16719	22	KYNU	KYNU_HUMAN Kynureninase OS=Homo sapiens OX=9606 GN=KYNU PE=1 SV=1	ELKC(BTD[C])HPTDER AELKC(BTD[C])HPTDER AAELKC(BTD[C])HPTDER IAAELKC(BTD[C])HPTDER KC(BTD[C])HPTDER LKC(BTD[C])HPTDER|AELKC(BTD[C])HPTDER AAELKC(BTD[C])HPTDER IAAELKC(BTD[C])HPTDER LKC(BTD[C])HPTDER	14|13	0.975|0.88	0.9275	0.06718	27	2
628	P24752	126	ACAT1	THIL_HUMAN Acetyl-CoA acetyltransferase, mitochondrial OS=Homo sapiens OX=9606 GN=ACAT1 PE=1 SV=1	VC(BTD[C])ASGMK|VC(BTD[C])ASGMK	2|2	0.905|0.95	0.9275	0.03182	4	2	Active site
629	P62854	23	RPS26	RS26_HUMAN 40S ribosomal protein S26 OS=Homo sapiens OX=9606 GN=RPS26 PE=1 SV=3	QPIRC(BTD[C])TNCAR VQPIRC(BTD[C])TNCAR|QPIRC(BTD[C])TNCAR	3|1	0.84|1.01	0.925	0.12021	4	2
630	Q9H8S9	109	MOB1A	MOB1A_HUMAN MOB kinase activator 1A OS=Homo sapiens OX=9606 GN=MOB1A PE=1 SV=4	PIKC(BTD[C])SAPK KPIKC(BTD[C])SAPK|KPIKC(BTD[C])SAPK	2|1	0.88|0.97	0.925	0.06364	3	2
631	P23141	274	CES1	EST1_HUMAN Liver carboxylesterase 1 OS=Homo sapiens OX=9606 GN=CES1 PE=1 SV=2	KGDVKPLAEQIAITAGC(BTD[C])K|KGDVKPLAEQIAITAGC(BTD[C])K GDVKPLAEQIAITAGC(BTD[C])K	2|6	1.055|0.785	0.92	0.19092	8	2	Disulfide bond
632	P08865	148	RPSA	RSSA_HUMAN 40S ribosomal protein SA OS=Homo sapiens OX=9606 GN=RPSA PE=1 SV=4	ADHQPLTEASYVNLPTIALC(BTD[C])NTDSPLR|	1|	0.92|	0.92	NA	1	1
633	Q09161	332	NCBP1	NCBP1_HUMAN Nuclear cap-binding protein subunit 1 OS=Homo sapiens OX=9606 GN=NCBP1 PE=1 SV=1	|KTC(BTD[C])AAQLVSYPGK	|2	|0.92	0.92	NA	2	1
634	P21333	1157	FLNA	FLNA_HUMAN Filamin-A OS=Homo sapiens OX=9606 GN=FLNA PE=1 SV=4	|AHVVPC(BTD[C])FDASK	|2	|0.92	0.92	NA	2	1
635	P21108	284	PRPS1L1	PRPS3_HUMAN Ribose-phosphate pyrophosphokinase 3 OS=Homo sapiens OX=9606 GN=PRPS1L1 PE=1 SV=2	|MKHC(BTD[C])SK	|1	|0.92	0.92	NA	1	1
636	P43487	99	RANBP1	RANG_HUMAN Ran-specific GTPase-activating protein OS=Homo sapiens OX=9606 GN=RANBP1 PE=1 SV=1	IC(BTD[C])ANHYITPMMELKPNAGSDR|IC(BTD[C])ANHYITPMMELKPNAGSDR	3|1	0.98|0.85	0.915	0.09192	4	2
637	P34932	779	HSPA4	HSP74_HUMAN Heat shock 70 kDa protein 4 OS=Homo sapiens OX=9606 GN=HSPA4 PE=1 SV=4	ELTSTC(BTD[C])SPIISKPK|ELTSTC(BTD[C])SPIISKPK	2|2	0.87|0.96	0.915	0.06364	4	2
638	P20618	224	PSMB1	PSB1_HUMAN Proteasome subunit beta type-1 OS=Homo sapiens OX=9606 GN=PSMB1 PE=1 SV=2	IC(BTD[C])IVTK|IC(BTD[C])IVTK	1|2	1.19|0.64	0.915	0.38891	3	2
639	P09936	90	UCHL1	UCHL1_HUMAN Ubiquitin carboxyl-terminal hydrolase isozyme L1 OS=Homo sapiens OX=9606 GN=UCHL1 PE=1 SV=2	QTIGNSC(BTD[C])GTIGLIHAVANNQDK|QTIGNSC(BTD[C])GTIGLIHAVANNQDK	2|2	0.99|0.84	0.915	0.10607	4	2	Active site
640	P51858	108	HDGF	HDGF_HUMAN Hepatoma-derived growth factor OS=Homo sapiens OX=9606 GN=HDGF PE=1 SV=1	KSC(BTD[C])VEEPEPEPEAAEGDGDKK|KSC(BTD[C])VEEPEPEPEAAEGDGDKK	2|4	0.895|0.925	0.91	0.02121	6	2	Disulfide bond
641	P21333	1018	FLNA	FLNA_HUMAN Filamin-A OS=Homo sapiens OX=9606 GN=FLNA PE=1 SV=4	IVGPSGAAVPC(BTD[C])K IVGPSGAAVPC(BTD[C])KVEPGLGADNSVVR|	4|	0.91|	0.91	NA	4	1
642	Q16531	128	DDB1	DDB1_HUMAN DNA damage-binding protein 1 OS=Homo sapiens OX=9606 GN=DDB1 PE=1 SV=1	IGRPSETGIIGIIDPEC(BTD[C])R|	1|	0.91|	0.91	NA	1	1
643	P36578	208	RPL4	RL4_HUMAN 60S ribosomal protein L4 OS=Homo sapiens OX=9606 GN=RPL4 PE=1 SV=5	GPC(BTD[C])IIYNEDNGIIK|	1|	0.91|	0.91	NA	1	1
644	P12004	162	PCNA	PCNA_HUMAN Proliferating cell nuclear antigen OS=Homo sapiens OX=9606 GN=PCNA PE=1 SV=1	|DLSHIGDAVVISC(BTD[C])AK	|2	|0.91	0.91	NA	2	1
645	Q99832	158	CCT7	TCPH_HUMAN T-complex protein 1 subunit eta OS=Homo sapiens OX=9606 GN=CCT7 PE=1 SV=2	LLEKC(BTD[C])AMTALSSK|LLEKC(BTD[C])AMTALSSK	5|2	0.91|0.905	0.9075	0.00354	7	2
646	P36551	373	CPOX	HEM6_HUMAN Oxygen-dependent coproporphyrinogen-III oxidase, mitochondrial OS=Homo sapiens OX=9606 GN=CPOX PE=1 SV=3	KHC(BTD[C])DDSFTPQEK|KHC(BTD[C])DDSFTPQEK	1|1	0.94|0.87	0.905	0.0495	2	2
647	Q6PUV4	90	CPLX2	CPLX2_HUMAN Complexin-2 OS=Homo sapiens OX=9606 GN=CPLX2 PE=2 SV=2	AALEQPC(BTD[C])EGSLTRPK|AALEQPC(BTD[C])EGSLTRPK	2|1	0.85|0.96	0.905	0.07778	3	2
648	Q15370	60	ELOB	ELOB_HUMAN Elongin-B OS=Homo sapiens OX=9606 GN=ELOB PE=1 SV=1	GEC(BTD[C])GFTSQTAR|GEC(BTD[C])GFTSQTAR	1|2	0.91|0.9	0.905	0.00707	3	2
649	Q16851	276	UGP2	UGPA_HUMAN UTP--glucose-1-phosphate uridylyltransferase OS=Homo sapiens OX=9606 GN=UGP2 PE=1 SV=5	RC(BTD[C])EFVMEVTNK|RC(BTD[C])EFVMEVTNK	1|1	0.88|0.93	0.905	0.03536	2	2
650	Q6P2Q9	435	PRPF8	PRP8_HUMAN Pre-mRNA-processing-splicing factor 8 OS=Homo sapiens OX=9606 GN=PRPF8 PE=1 SV=2	EHC(BTD[C])PAGQPVK|	1|	0.9|	0.9	NA	1	1
651	Q16881	571	TXNRD1	TRXR1_HUMAN Thioredoxin reductase 1, cytoplasmic OS=Homo sapiens OX=9606 GN=TXNRD1 PE=1 SV=3	DNNKC(BTD[C])YAK|DNNKC(BTD[C])YAK	4|1	0.88|0.92	0.9	0.02828	5	2
652	P78527	491	PRKDC	PRKDC_HUMAN DNA-dependent protein kinase catalytic subunit OS=Homo sapiens OX=9606 GN=PRKDC PE=1 SV=3	IC(BTD[C])SKPVVLPK|IC(BTD[C])SKPVVLPK	1|1	0.97|0.83	0.9	0.09899	2	2
653	Q9NTK5	187	OLA1	OLA1_HUMAN Obg-like ATPase 1 OS=Homo sapiens OX=9606 GN=OLA1 PE=1 SV=2	LKPEYDIMC(BTD[C])K|	1|	0.9|	0.9	NA	1	1
654	O75116	607	ROCK2	ROCK2_HUMAN Rho-associated protein kinase 2 OS=Homo sapiens OX=9606 GN=ROCK2 PE=1 SV=4	DLQDKNC(BTD[C])LLETAK|	1|	0.9|	0.9	NA	1	1
655	O43707	499	ACTN4	ACTN4_HUMAN Alpha-actinin-4 OS=Homo sapiens OX=9606 GN=ACTN4 PE=1 SV=2	IC(BTD[C])DQWDALGSLTHSR|	3|	0.9|	0.9	NA	3	1
656	P29474	991	NOS3	NOS3_HUMAN Nitric oxide synthase, endothelial OS=Homo sapiens OX=9606 GN=NOS3 PE=1 SV=4	VPC(BTD[C])FLR|	1|	0.9|	0.9	NA	1	1
657	Q9UMY4	67	SNX12	SNX12_HUMAN Sorting nexin-12 OS=Homo sapiens OX=9606 GN=SNX12 PE=1 SV=3	|LKESC(BTD[C])VR	|1	|0.9	0.9	NA	1	1
658	P30566	304	ADSL	PUR8_HUMAN Adenylosuccinate lyase OS=Homo sapiens OX=9606 GN=ADSL PE=1 SV=2	|SERC(BTD[C])CSLAR	|1	|0.9	0.9	NA	1	1
659	P18669	55	PGAM1	PGAM1_HUMAN Phosphoglycerate mutase 1 OS=Homo sapiens OX=9606 GN=PGAM1 PE=1 SV=2	DIC(BTD[C])FTSVQK FDIC(BTD[C])FTSVQK YEFDIC(BTD[C])FTSVQK|FDIC(BTD[C])FTSVQK	6|2	1.035|0.76	0.8975	0.19445	8	2
660	O14929	27	HAT1	HAT1_HUMAN Histone acetyltransferase type B catalytic subunit OS=Homo sapiens OX=9606 GN=HAT1 PE=1 SV=1	LAEYKC(BTD[C])NTNTAIELK|LAEYKC(BTD[C])NTNTAIELK	1|2	0.78|1.01	0.895	0.16263	3	2
661	Q96FV9	49	THOC1	THOC1_HUMAN THO complex subunit 1 OS=Homo sapiens OX=9606 GN=THOC1 PE=1 SV=1	KC(BTD[C])TLDQAFR|KC(BTD[C])TLDQAFR	1|1	0.99|0.8	0.895	0.13435	2	2
662	Q9BQA1	172	WDR77	MEP50_HUMAN Methylosome protein 50 OS=Homo sapiens OX=9606 GN=WDR77 PE=1 SV=1	AHAAQVTC(BTD[C])VAASPHK|AHAAQVTC(BTD[C])VAASPHK	1|4	0.71|1.07	0.89	0.25456	5	2
663	P47756	206	CAPZB	CAPZB_HUMAN F-actin-capping protein subunit beta OS=Homo sapiens OX=9606 GN=CAPZB PE=1 SV=4	DETVSDC(BTD[C])SPHIANIGR|DETVSDC(BTD[C])SPHIANIGR	2|2	0.84|0.94	0.89	0.07071	4	2
664	P62906	164	RPL10A	RL10A_HUMAN 60S ribosomal protein L10a OS=Homo sapiens OX=9606 GN=RPL10A PE=1 SV=2	VLC(BTD[C])LAVAVGHVK|	2|	0.89|	0.89	NA	2	1
665	Q10713	466	PMPCA	MPPA_HUMAN Mitochondrial-processing peptidase subunit alpha OS=Homo sapiens OX=9606 GN=PMPCA PE=1 SV=2	|LPHELC(BTD[C])TLIR	|1	|0.89	0.89	NA	1	1
666	P62937	115	PPIA	PPIA_HUMAN Peptidyl-prolyl cis-trans isomerase A OS=Homo sapiens OX=9606 GN=PPIA PE=1 SV=2	HTGPGILSMANAGPNTNGSQFFIC(BTD[C])TAK|HTGPGILSMANAGPNTNGSQFFIC(BTD[C])TAK	3|2	0.92|0.855	0.8875	0.04596	5	2
667	P62942	23	FKBP1A	FKB1A_HUMAN Peptidyl-prolyl cis-trans isomerase FKBP1A OS=Homo sapiens OX=9606 GN=FKBP1A PE=1 SV=2	GQTC(BTD[C])VVHYTGMLEDGKK TC(BTD[C])VVHYTGMLEDGK GQTC(BTD[C])VVHYTGMLEDGK|GQTC(BTD[C])VVHYTGMLEDGKK GQTC(BTD[C])VVHYTGMLEDGK	7|3	0.84|0.93	0.885	0.06364	10	2
668	P09936	152	UCHL1	UCHL1_HUMAN Ubiquitin carboxyl-terminal hydrolase isozyme L1 OS=Homo sapiens OX=9606 GN=UCHL1 PE=1 SV=2	NEAIQAAHDAVAQEGQC(BTD[C])R|	6|	0.88|	0.88	NA	6	1
669	Q00839	562	HNRNPU	HNRPU_HUMAN Heterogeneous nuclear ribonucleoprotein U OS=Homo sapiens OX=9606 GN=HNRNPU PE=1 SV=6	APQC(BTD[C])LGK|	1|	0.88|	0.88	NA	1	1
670	Q8IZL8	522	PELP1	PELP1_HUMAN Proline-, glutamic acid- and leucine-rich protein 1 OS=Homo sapiens OX=9606 GN=PELP1 PE=1 SV=2	KGDSNANSDVC(BTD[C])AAALR|KGDSNANSDVC(BTD[C])AAALR	2|2	0.77|0.99	0.88	0.15556	4	2
671	P61160	221	ACTR2	ARP2_HUMAN Actin-related protein 2 OS=Homo sapiens OX=9606 GN=ACTR2 PE=1 SV=1	EKLC(BTD[C])YVGYNIEQEQK|	1|	0.88|	0.88	NA	1	1
672	Q8TBC4	139	UBA3	UBA3_HUMAN NEDD8-activating enzyme E1 catalytic subunit OS=Homo sapiens OX=9606 GN=UBA3 PE=1 SV=2	|VPNC(BTD[C])NVVPHFNK	|3	|0.88	0.88	NA	3	1
673	O95831	256	AIFM1	AIFM1_HUMAN Apoptosis-inducing factor 1, mitochondrial OS=Homo sapiens OX=9606 GN=AIFM1 PE=1 SV=1	|LNDGSQITYEKC(BTD[C])LIATGGTPR	|1	|0.88	0.88	NA	1	1
674	P25398	50	RPS12	RS12_HUMAN 40S ribosomal protein S12 OS=Homo sapiens OX=9606 GN=RPS12 PE=1 SV=3	|QAHLC(BTD[C])VLASNCDEPMYVK	|1	|0.88	0.88	NA	1	1
675	Q14232	115	EIF2B1	EI2BA_HUMAN Translation initiation factor eIF-2B subunit alpha OS=Homo sapiens OX=9606 GN=EIF2B1 PE=1 SV=1	|IADLC(BTD[C])HTFIK	|1	|0.88	0.88	NA	1	1
676	O75369	1915	FLNB	FLNB_HUMAN Filamin-B OS=Homo sapiens OX=9606 GN=FLNB PE=1 SV=2	|RC(BTD[C])SQVK	|1	|0.88	0.88	NA	1	1
677	Q9ULV4	456	CORO1C	COR1C_HUMAN Coronin-1C OS=Homo sapiens OX=9606 GN=CORO1C PE=1 SV=1	SIKDTIC(BTD[C])NQDER|SIKDTIC(BTD[C])NQDER	2|4	0.85|0.905	0.8775	0.03889	6	2
678	P62888	85	RPL30	RL30_HUMAN 60S ribosomal protein L30 OS=Homo sapiens OX=9606 GN=RPL30 PE=1 SV=2	TGVHHYSGNNIELGTAC(BTD[C])GK|TGVHHYSGNNIELGTAC(BTD[C])GK	1|2	0.95|0.8	0.875	0.10607	3	2
679	Q9BRX8	85	PRXL2A	PXL2A_HUMAN Peroxiredoxin-like 2A OS=Homo sapiens OX=9606 GN=PRXL2A PE=1 SV=3	RPGC(BTD[C])FLCR|	4|	0.875|	0.875	NA	4	1	Active site
680	Q14974	543	KPNB1	IMB1_HUMAN Importin subunit beta-1 OS=Homo sapiens OX=9606 GN=KPNB1 PE=1 SV=2	NSAKDC(BTD[C])YPAVQK|NSAKDC(BTD[C])YPAVQK	2|2	0.82|0.92	0.87	0.07071	4	2
681	O00232	31	PSMD12	PSD12_HUMAN 26S proteasome non-ATPase regulatory subunit 12 OS=Homo sapiens OX=9606 GN=PSMD12 PE=1 SV=3	LPEC(BTD[C])AK|	1|	0.87|	0.87	NA	1	1
682	P12931	248	SRC	SRC_HUMAN Proto-oncogene tyrosine-protein kinase Src OS=Homo sapiens OX=9606 GN=SRC PE=1 SV=3	LTTVC(BTD[C])PTSKPQTQGLAK|LTTVC(BTD[C])PTSKPQTQGLAK	1|1	0.8|0.94	0.87	0.09899	2	2
683	P60981	39	DSTN	DEST_HUMAN Destrin OS=Homo sapiens OX=9606 GN=DSTN PE=1 SV=3	FC(BTD[C])LSADKK IFC(BTD[C])LSADKK|FC(BTD[C])LSADKK	3|3	0.94|0.8	0.87	0.09899	6	2
684	P49327	1828	FASN	FAS_HUMAN Fatty acid synthase OS=Homo sapiens OX=9606 GN=FASN PE=1 SV=3	PLKC(BTD[C])TVFHGAQVEDAFR DGVVRPLKC(BTD[C])TVFHGAQVEDAFR|PLKC(BTD[C])TVFHGAQVEDAFR	3|1	0.8|0.94	0.87	0.09899	4	2
685	Q9BR76	345	CORO1B	COR1B_HUMAN Coronin-1B OS=Homo sapiens OX=9606 GN=CORO1B PE=1 SV=1	KC(BTD[C])EPIVMTVPR|KC(BTD[C])EPIVMTVPR	1|1	0.99|0.75	0.87	0.16971	2	2
686	Q01469	87	FABP5	FABP5_HUMAN Fatty acid-binding protein 5 OS=Homo sapiens OX=9606 GN=FABP5 PE=1 SV=3	TQTVC(BTD[C])NFTDGALVQHQEWDGK|	1|	0.87|	0.87	NA	1	1
687	P49588	75	AARS	SYAC_HUMAN Alanine--tRNA ligase, cytoplasmic OS=Homo sapiens OX=9606 GN=AARS PE=1 SV=2	|AANTQKC(BTD[C])IR	|1	|0.87	0.87	NA	1	1
688	Q92598	140	HSPH1	HS105_HUMAN Heat shock protein 105 kDa OS=Homo sapiens OX=9606 GN=HSPH1 PE=1 SV=1	|KPVTDC(BTD[C])VISVPSFFTDAER	|2	|0.87	0.87	NA	2	1
689	P09543	252	CNP	CN37_HUMAN 2',3'-cyclic-nucleotide 3'-phosphodiesterase OS=Homo sapiens OX=9606 GN=CNP PE=1 SV=2	RPPGVLHC(BTD[C])TTK PPGVLHC(BTD[C])TTK|	5|	0.86|	0.86	NA	5	1
690	P53396	20	ACLY	ACLY_HUMAN ATP-citrate synthase OS=Homo sapiens OX=9606 GN=ACLY PE=1 SV=3	IC(BTD[C])TTSAIQNR FIC(BTD[C])TTSAIQNR|IC(BTD[C])TTSAIQNR FIC(BTD[C])TTSAIQNR	6|3	0.76|0.96	0.86	0.14142	9	2
691	Q96Q11	373	TRNT1	TRNT1_HUMAN CCA tRNA nucleotidyltransferase 1, mitochondrial OS=Homo sapiens OX=9606 GN=TRNT1 PE=1 SV=2	YQGEHC(BTD[C])LLK|	1|	0.86|	0.86	NA	1	1	Disulfide bond
692	O94925	178	GLS	GLSK_HUMAN Glutaminase kidney isoform, mitochondrial OS=Homo sapiens OX=9606 GN=GLS PE=1 SV=1	LKEC(BTD[C])MDMLR|	1|	0.86|	0.86	NA	1	1
693	P27695	208	APEX1	APEX1_HUMAN DNA-(apurinic or apyrimidinic site) lyase OS=Homo sapiens OX=9606 GN=APEX1 PE=1 SV=2	KPLVLC(BTD[C])GDLNVAHEEIDLR|KPLVLC(BTD[C])GDLNVAHEEIDLR	2|1	0.9|0.82	0.86	0.05657	3	2
694	P17812	176	CTPS1	PYRG1_HUMAN CTP synthase 1 OS=Homo sapiens OX=9606 GN=CTPS1 PE=1 SV=2	ENFC(BTD[C])NIHVSLVPQPSSTGEQK|	1|	0.86|	0.86	NA	1	1
695	P10809	237	HSPD1	CH60_HUMAN 60 kDa heat shock protein, mitochondrial OS=Homo sapiens OX=9606 GN=HSPD1 PE=1 SV=2	GQKC(BTD[C])EFQDAYVLLSEK|	2|	0.86|	0.86	NA	2	1
696	P00367	376	GLUD1	DHE3_HUMAN Glutamate dehydrogenase 1, mitochondrial OS=Homo sapiens OX=9606 GN=GLUD1 PE=1 SV=2	AKPYEGSILEADC(BTD[C])DILIPAASEK|	1|	0.86|	0.86	NA	1	1
697	Q9P0L0	128	VAPA	VAPA_HUMAN Vesicle-associated membrane protein-associated protein A OS=Homo sapiens OX=9606 GN=VAPA PE=1 SV=3	|LRC(BTD[C])VFEMPNENDK	|1	|0.86	0.86	NA	1	1
698	P34897	241	SHMT2	GLYM_HUMAN Serine hydroxymethyltransferase, mitochondrial OS=Homo sapiens OX=9606 GN=SHMT2 PE=1 SV=3	MREVC(BTD[C])DEVK|MREVC(BTD[C])DEVK	2|1	0.9|0.81	0.855	0.06364	3	2
699	P30405	104	PPIF	PPIF_HUMAN Peptidyl-prolyl cis-trans isomerase F, mitochondrial OS=Homo sapiens OX=9606 GN=PPIF PE=1 SV=1	VIPSFMC(BTD[C])QAGDFTNHNGTGGK|VIPSFMC(BTD[C])QAGDFTNHNGTGGK	1|1	0.78|0.93	0.855	0.10607	2	2
700	Q9UHD1	86	CHORDC1	CHRD1_HUMAN Cysteine and histidine-rich domain-containing protein 1 OS=Homo sapiens OX=9606 GN=CHORDC1 PE=1 SV=2	KELC(BTD[C])ELKPK ELC(BTD[C])ELKPK|	3|	0.85|	0.85	NA	3	1
701	Q86WR0	150	CCDC25	CCD25_HUMAN Coiled-coil domain-containing protein 25 OS=Homo sapiens OX=9606 GN=CCDC25 PE=1 SV=2	FPDLAAEKEC(BTD[C])R|	1|	0.85|	0.85	NA	1	1
702	Q9NVS9	156	PNPO	PNPO_HUMAN Pyridoxine-5'-phosphate oxidase OS=Homo sapiens OX=9606 GN=PNPO PE=1 SV=1	LPEEEAEC(BTD[C])YFHSR|LPEEEAEC(BTD[C])YFHSR	1|1	0.99|0.71	0.85	0.19799	2	2
703	P35579	917	MYH9	MYH9_HUMAN Myosin-9 OS=Homo sapiens OX=9606 GN=MYH9 PE=1 SV=4	KQELEEIC(BTD[C])HDLEAR|	1|	0.85|	0.85	NA	1	1
704	Q3LXA3	155	TKFC	TKFC_HUMAN Triokinase/FMN cyclase OS=Homo sapiens OX=9606 GN=TKFC PE=1 SV=2	GLC(BTD[C])GTVLIHK|	3|	0.85|	0.85	NA	3	1
705	P17844	191	DDX5	DDX5_HUMAN Probable ATP-dependent RNA helicase DDX5 OS=Homo sapiens OX=9606 GN=DDX5 PE=1 SV=1	ELAQQVQQVAAEYC(BTD[C])R|	1|	0.85|	0.85	NA	1	1
706	P31948	278	STIP1	STIP1_HUMAN Stress-induced-phosphoprotein 1 OS=Homo sapiens OX=9606 GN=STIP1 PE=1 SV=1	|GDYNKC(BTD[C])R	|4	|0.85	0.85	NA	4	1
707	Q9Y487	58	ATP6V0A2	VPP2_HUMAN V-type proton ATPase 116 kDa subunit a isoform 2 OS=Homo sapiens OX=9606 GN=ATP6V0A2 PE=1 SV=2	|RC(BTD[C])EELER	|1	|0.85	0.85	NA	1	1
708	P27816	635	MAP4	MAP4_HUMAN Microtubule-associated protein 4 OS=Homo sapiens OX=9606 GN=MAP4 PE=1 SV=3	|KC(BTD[C])SLPAEEDSVLEK	|1	|0.85	0.85	NA	1	1
709	P48556	112	PSMD8	PSMD8_HUMAN 26S proteasome non-ATPase regulatory subunit 8 OS=Homo sapiens OX=9606 GN=PSMD8 PE=1 SV=2	SPNLSKC(BTD[C])GEELGR|SPNLSKC(BTD[C])GEELGR	1|2	1.01|0.68	0.845	0.23335	3	2
710	P13639	67	EEF2	EF2_HUMAN Elongation factor 2 OS=Homo sapiens OX=9606 GN=EEF2 PE=1 SV=4	KDEQERC(BTD[C])ITIK DEQERC(BTD[C])ITIK|KDEQERC(BTD[C])ITIK DEQERC(BTD[C])ITIK	4|6	0.9|0.78	0.84	0.08485	10	2
711	P31321	347	PRKAR1B	KAP1_HUMAN cAMP-dependent protein kinase type I-beta regulatory subunit OS=Homo sapiens OX=9606 GN=PRKAR1B PE=1 SV=4	GPLKC(BTD[C])VK|GPLKC(BTD[C])VK	3|1	0.62|1.06	0.84	0.31113	4	2
712	P05556	691	ITGB1	ITB1_HUMAN Integrin beta-1 OS=Homo sapiens OX=9606 GN=ITGB1 PE=1 SV=2	DKLPQPVQPDPVSHC(BTD[C])K|	3|	0.84|	0.84	NA	3	1	Disulfide bond
713	P04083	270	ANXA1	ANXA1_HUMAN Annexin A1 OS=Homo sapiens OX=9606 GN=ANXA1 PE=1 SV=2	C(BTD[C])ATSKPAFFAEK|C(BTD[C])ATSKPAFFAEK	1|1	0.72|0.96	0.84	0.16971	2	2
714	P20073	413	ANXA7	ANXA7_HUMAN Annexin A7 OS=Homo sapiens OX=9606 GN=ANXA7 PE=1 SV=3	TILQC(BTD[C])ALNRPAFFAER|TILQC(BTD[C])ALNRPAFFAER	1|2	0.92|0.76	0.84	0.11314	3	2
715	Q16643	96	DBN1	DREB_HUMAN Drebrin OS=Homo sapiens OX=9606 GN=DBN1 PE=1 SV=4	KC(BTD[C])ACASHVAK|KC(BTD[C])ACASHVAK	1|3	1.02|0.66	0.84	0.25456	4	2
716	O75083	225	WDR1	WDR1_HUMAN WD repeat-containing protein 1 OS=Homo sapiens OX=9606 GN=WDR1 PE=1 SV=4	|VC(BTD[C])ALGGSK	|1	|0.84	0.84	NA	1	1
717	P54578	277	USP14	UBP14_HUMAN Ubiquitin carboxyl-terminal hydrolase 14 OS=Homo sapiens OX=9606 GN=USP14 PE=1 SV=3	|GKENQLQLSC(BTD[C])FINQEVK	|1	|0.84	0.84	NA	1	1
718	P09429	23	HMGB1	HMGB1_HUMAN High mobility group protein B1 OS=Homo sapiens OX=9606 GN=HMGB1 PE=1 SV=3	FVQTC(BTD[C])R FFVQTC(BTD[C])R|FVQTC(BTD[C])R	3|1	0.63|1.04	0.835	0.28991	4	2	Modified residue, Disulfide bond
719	P46734	29	MAP2K3	MP2K3_HUMAN Dual specificity mitogen-activated protein kinase kinase 3 OS=Homo sapiens OX=9606 GN=MAP2K3 PE=1 SV=2	ISC(BTD[C])MSKPPAPNPTPPR|ISC(BTD[C])MSKPPAPNPTPPR	1|1	0.64|1.02	0.83	0.2687	2	2
720	O75367	297	H2AFY	H2AY_HUMAN Core histone macro-H2A.1 OS=Homo sapiens OX=9606 GN=H2AFY PE=1 SV=4	NC(BTD[C])LALADDKK|	1|	0.83|	0.83	NA	1	1
721	P40926	93	MDH2	MDHM_HUMAN Malate dehydrogenase, mitochondrial OS=Homo sapiens OX=9606 GN=MDH2 PE=1 SV=3	GC(BTD[C])DVVVIPAGVPR|	2|	0.83|	0.83	NA	2	1
722	P00558	108	PGK1	PGK1_HUMAN Phosphoglycerate kinase 1 OS=Homo sapiens OX=9606 GN=PGK1 PE=1 SV=3	|AC(BTD[C])ANPAAGSVILLENLR	|1	|0.83	0.83	NA	1	1
723	Q14019	10	COTL1	COTL1_HUMAN Coactosin-like protein OS=Homo sapiens OX=9606 GN=COTL1 PE=1 SV=3	IDKEAC(BTD[C])R|IDKEAC(BTD[C])R	5|8	0.82|0.835	0.8275	0.01061	13	2
724	P30519	265	HMOX2	HMOX2_HUMAN Heme oxygenase 2 OS=Homo sapiens OX=9606 GN=HMOX2 PE=1 SV=2	KC(BTD[C])PFYAAEQDK|KC(BTD[C])PFYAAEQDK	2|2	0.75|0.89	0.82	0.09899	4	2
725	Q9ULA0	38	DNPEP	DNPEP_HUMAN Aspartyl aminopeptidase OS=Homo sapiens OX=9606 GN=DNPEP PE=1 SV=1	PSPFHAVAEC(BTD[C])R|	1|	0.82|	0.82	NA	1	1
726	P15170	237	GSPT1	ERF3A_HUMAN Eukaryotic peptide chain release factor GTP-binding subunit ERF3A OS=Homo sapiens OX=9606 GN=GSPT1 PE=1 SV=1	YEEC(BTD[C])KEK|	1|	0.82|	0.82	NA	1	1
727	P52272	694	HNRNPM	HNRPM_HUMAN Heterogeneous nuclear ribonucleoprotein M OS=Homo sapiens OX=9606 GN=HNRNPM PE=1 SV=3	SKGC(BTD[C])GVVK|	1|	0.81|	0.81	NA	1	1
728	Q99460	806	PSMD1	PSMD1_HUMAN 26S proteasome non-ATPase regulatory subunit 1 OS=Homo sapiens OX=9606 GN=PSMD1 PE=1 SV=2	SNC(BTD[C])KPSTFAYPAPLEVPK|	1|	0.81|	0.81	NA	1	1
729	P55769	102	SNU13	NH2L1_HUMAN NHP2-like protein 1 OS=Homo sapiens OX=9606 GN=SNU13 PE=1 SV=3	PVIAC(BTD[C])SVTIK|	2|	0.81|	0.81	NA	2	1
730	A5A3E0	972	POTEF	POTEF_HUMAN POTE ankyrin domain family member F OS=Homo sapiens OX=9606 GN=POTEF PE=1 SV=2	CPEALFQPCFLGMESC(BTD[C])GIHETTFNSIMK|	1|	0.81|	0.81	NA	1	1
731	Q9Y5X3	346	SNX5	SNX5_HUMAN Sorting nexin-5 OS=Homo sapiens OX=9606 GN=SNX5 PE=1 SV=1	LAEAHQQEC(BTD[C])CQK|	1|	0.81|	0.81	NA	1	1
732	Q9P0R6	77	GSKIP	GSKIP_HUMAN GSK3B-interacting protein OS=Homo sapiens OX=9606 GN=GSKIP PE=1 SV=2	|NRYC(BTD[C])LELTEAGLK	|1	|0.81	0.81	NA	1	1
733	P39023	157	RPL3	RL3_HUMAN 60S ribosomal protein L3 OS=Homo sapiens OX=9606 GN=RPL3 PE=1 SV=2	KYC(BTD[C])QVIR|KYC(BTD[C])QVIR	2|2	0.79|0.82	0.805	0.02121	4	2
734	P07737	71	PFN1	PROF1_HUMAN Profilin-1 OS=Homo sapiens OX=9606 GN=PFN1 PE=1 SV=2	YVNGLTLGGQKC(BTD[C])SVIR|YVNGLTLGGQKC(BTD[C])SVIR SSFYVNGLTLGGQKC(BTD[C])SVIR	1|3	0.59|1.01	0.8	0.29698	4	2
735	P62244	72	RPS15A	RS15A_HUMAN 40S ribosomal protein S15a OS=Homo sapiens OX=9606 GN=RPS15A PE=1 SV=2	LNKC(BTD[C])GVISPR|LNKC(BTD[C])GVISPR	4|1	0.8|0.79	0.795	0.00707	5	2
736	P07900	420	HSP90AA1	HS90A_HUMAN Heat shock protein HSP 90-alpha OS=Homo sapiens OX=9606 GN=HSP90AA1 PE=1 SV=5	KC(BTD[C])LELFTELAEDKENYK|	2|	0.795|	0.795	NA	2	1
737	Q92598	650	HSPH1	HS105_HUMAN Heat shock protein 105 kDa OS=Homo sapiens OX=9606 GN=HSPH1 PE=1 SV=1	DKLC(BTD[C])GPYEK|	2|	0.785|	0.785	NA	2	1
738	Q99426	165	TBCB	TBCB_HUMAN Tubulin-folding cofactor B OS=Homo sapiens OX=9606 GN=TBCB PE=1 SV=2	AQASSIPVGSRC(BTD[C])EVR|	2|	0.78|	0.78	NA	2	1
739	Q14980	80	NUMA1	NUMA1_HUMAN Nuclear mitotic apparatus protein 1 OS=Homo sapiens OX=9606 GN=NUMA1 PE=1 SV=2	HPSSPEC(BTD[C])LVSAQK|	2|	0.78|	0.78	NA	2	1
740	P15121	299	AKR1B1	ALDR_HUMAN Aldo-keto reductase family 1 member B1 OS=Homo sapiens OX=9606 GN=AKR1B1 PE=1 SV=3	VC(BTD[C])ALLSCTSHK|VC(BTD[C])ALLSCTSHK	3|3	0.83|0.73	0.78	0.07071	6	2
741	P13639	728	EEF2	EF2_HUMAN Elongation factor 2 OS=Homo sapiens OX=9606 GN=EEF2 PE=1 SV=4	RC(BTD[C])LYASVLTAQPR|RC(BTD[C])LYASVLTAQPR	2|4	0.85|0.71	0.78	0.09899	6	2
742	P30041	47	PRDX6	PRDX6_HUMAN Peroxiredoxin-6 OS=Homo sapiens OX=9606 GN=PRDX6 PE=1 SV=3	|TPVC(BTD[C])TTELGR	|1	|0.78	0.78	NA	1	1	Active site
743	Q06203	207	PPAT	PUR1_HUMAN Amidophosphoribosyltransferase OS=Homo sapiens OX=9606 GN=PPAT PE=1 SV=1	|DPYGNRPLC(BTD[C])IGR	|1	|0.78	0.78	NA	1	1
744	P00387	204	CYB5R3	NB5R3_HUMAN NADH-cytochrome b5 reductase 3 OS=Homo sapiens OX=9606 GN=CYB5R3 PE=1 SV=3	DPDDHTVC(BTD[C])HLLFANQTEK|	1|	0.77|	0.77	NA	1	1
745	Q9BZL1	18	UBL5	UBL5_HUMAN Ubiquitin-like protein 5 OS=Homo sapiens OX=9606 GN=UBL5 PE=1 SV=1	|VKC(BTD[C])NTDDTIGDLKK	|2	|0.77	0.77	NA	2	1
746	Q14344	37	GNA13	GNA13_HUMAN Guanine nucleotide-binding protein subunit alpha-13 OS=Homo sapiens OX=9606 GN=GNA13 PE=1 SV=2	IDKC(BTD[C])LSR|	2|	0.76|	0.76	NA	2	1
747	P15374	95	UCHL3	UCHL3_HUMAN Ubiquitin carboxyl-terminal hydrolase isozyme L3 OS=Homo sapiens OX=9606 GN=UCHL3 PE=1 SV=1	|QTISNAC(BTD[C])GTIGLIHAIANNK	|1	|0.76	0.76	NA	1	1	Active site
748	P15121	45	AKR1B1	ALDR_HUMAN Aldo-keto reductase family 1 member B1 OS=Homo sapiens OX=9606 GN=AKR1B1 PE=1 SV=3	DC(BTD[C])AHVYQNENEVGVAIQEK IDC(BTD[C])AHVYQNENEVGVAIQEK|HIDC(BTD[C])AHVYQNENEVGVAIQEK DC(BTD[C])AHVYQNENEVGVAIQEK IDC(BTD[C])AHVYQNENEVGVAIQEK	3|6	0.72|0.78	0.75	0.04243	9	2
749	P54652	191	HSPA2	HSP72_HUMAN Heat shock-related 70 kDa protein 2 OS=Homo sapiens OX=9606 GN=HSPA2 PE=1 SV=1	GC(BTD[C])AGGEK|GC(BTD[C])AGGEK KGC(BTD[C])AGGEK	1|3	0.6|0.88	0.74	0.19799	4	2
750	P33992	397	MCM5	MCM5_HUMAN DNA replication licensing factor MCM5 OS=Homo sapiens OX=9606 GN=MCM5 PE=1 SV=5	FVEKC(BTD[C])SPIGVYTSGK|	1|	0.74|	0.74	NA	1	1
751	Q9Y490	1023	TLN1	TLN1_HUMAN Talin-1 OS=Homo sapiens OX=9606 GN=TLN1 PE=1 SV=3	|ASVPTIQDQASAMQLSQC(BTD[C])AK	|2	|0.74	0.74	NA	2	1
752	P78559	40	MAP1A	MAP1A_HUMAN Microtubule-associated protein 1A OS=Homo sapiens OX=9606 GN=MAP1A PE=1 SV=6	KPCC(BTD[C])YIFPGGR|	1|	0.73|	0.73	NA	1	1
753	P63279	75	UBE2I	UBC9_HUMAN SUMO-conjugating enzyme UBC9 OS=Homo sapiens OX=9606 GN=UBE2I PE=1 SV=1	|DDYPSSPPKC(BTD[C])K	|1	|0.73	0.73	NA	1	1
754	O75369	1617	FLNB	FLNB_HUMAN Filamin-B OS=Homo sapiens OX=9606 GN=FLNB PE=1 SV=2	|ATQTGDASKC(BTD[C])LATGPGIASTVK	|3	|0.73	0.73	NA	3	1
755	P15121	187	AKR1B1	ALDR_HUMAN Aldo-keto reductase family 1 member B1 OS=Homo sapiens OX=9606 GN=AKR1B1 PE=1 SV=3	YKPAVNQIEC(BTD[C])HPYLTQEK PAVNQIEC(BTD[C])HPYLTQEK|YKPAVNQIEC(BTD[C])HPYLTQEK PAVNQIEC(BTD[C])HPYLTQEK	9|6	0.72|0.73	0.725	0.00707	15	2
756	Q9H115	164	NAPB	SNAB_HUMAN Beta-soluble NSF attachment protein OS=Homo sapiens OX=9606 GN=NAPB PE=1 SV=2	|GEESNSSANKC(BTD[C])LLK	|1	|0.71	0.71	NA	1	1
757	P15880	182	RPS2	RS2_HUMAN 40S ribosomal protein S2 OS=Homo sapiens OX=9606 GN=RPS2 PE=1 SV=2	IGKPHTVPC(BTD[C])K PHTVPC(BTD[C])K|IGKPHTVPC(BTD[C])K	6|4	0.705|0.71	0.7075	0.00354	10	2
758	P60900	47	PSMA6	PSA6_HUMAN Proteasome subunit alpha type-6 OS=Homo sapiens OX=9606 GN=PSMA6 PE=1 SV=1	GKDC(BTD[C])AVIVTQK|	2|	0.7|	0.7	NA	2	1
759	O43684	129	BUB3	BUB3_HUMAN Mitotic checkpoint protein BUB3 OS=Homo sapiens OX=9606 GN=BUB3 PE=1 SV=1	TPC(BTD[C])NAGTFSQPEK|	1|	0.69|	0.69	NA	1	1
760	Q92598	796	HSPH1	HS105_HUMAN Heat shock protein 105 kDa OS=Homo sapiens OX=9606 GN=HSPH1 PE=1 SV=1	ELNNTC(BTD[C])EPVVTQPKPK|ELNNTC(BTD[C])EPVVTQPKPK	1|1	0.55|0.82	0.685	0.19092	2	2
761	Q9Y277	65	VDAC3	VDAC3_HUMAN Voltage-dependent anion-selective channel protein 3 OS=Homo sapiens OX=9606 GN=VDAC3 PE=1 SV=1	YKVC(BTD[C])NYGLTFTQK|YKVC(BTD[C])NYGLTFTQK	1|2	0.73|0.64	0.685	0.06364	3	2
762	P60981	23	DSTN	DEST_HUMAN Destrin OS=Homo sapiens OX=9606 GN=DSTN PE=1 SV=3	KC(BTD[C])STPEEIKK|KC(BTD[C])STPEEIKK KC(BTD[C])STPEEIK	4|5	0.635|0.73	0.6825	0.06718	9	2
763	Q13148	50	TARDBP	TADBP_HUMAN TAR DNA-binding protein 43 OS=Homo sapiens OX=9606 GN=TARDBP PE=1 SV=1	|NPVSQC(BTD[C])MR	|1	|0.68	0.68	NA	1	1
764	Q9NZI8	257	IGF2BP1	IF2B1_HUMAN Insulin-like growth factor 2 mRNA-binding protein 1 OS=Homo sapiens OX=9606 GN=IGF2BP1 PE=1 SV=2	AISVHSTPEGCSSAC(BTD[C])K|AISVHSTPEGCSSAC(BTD[C])K	2|1	0.715|0.63	0.6725	0.0601	3	2
765	Q86VP1	456	TAX1BP1	TAXB1_HUMAN Tax1-binding protein 1 OS=Homo sapiens OX=9606 GN=TAX1BP1 PE=1 SV=2	FKEC(BTD[C])QR|	1|	0.67|	0.67	NA	1	1
766	Q06323	22	PSME1	PSME1_HUMAN Proteasome activator complex subunit 1 OS=Homo sapiens OX=9606 GN=PSME1 PE=1 SV=1	FREDLC(BTD[C])TK|	1|	0.67|	0.67	NA	1	1
767	P53618	684	COPB1	COPB_HUMAN Coatomer subunit beta OS=Homo sapiens OX=9606 GN=COPB1 PE=1 SV=3	|NEMNC(BTD[C])K	|1	|0.67	0.67	NA	1	1
768	Q02878	44	RPL6	RL6_HUMAN 60S ribosomal protein L6 OS=Homo sapiens OX=9606 GN=RPL6 PE=1 SV=3	KPHC(BTD[C])SR GKPHC(BTD[C])SR|GKPHC(BTD[C])SR	3|1	0.68|0.61	0.645	0.0495	4	2
769	P42330	188	AKR1C3	AK1C3_HUMAN Aldo-keto reductase family 1 member C3 OS=Homo sapiens OX=9606 GN=AKR1C3 PE=1 SV=4	YKPVC(BTD[C])NQVECHPYFNR|YKPVC(BTD[C])NQVECHPYFNR	2|2	0.645|0.64	0.6425	0.00354	4	2
770	O15269	370	SPTLC1	SPTC1_HUMAN Serine palmitoyltransferase 1 OS=Homo sapiens OX=9606 GN=SPTLC1 PE=1 SV=1	EKC(BTD[C])GQIHK|	1|	0.64|	0.64	NA	1	1
771	P33176	421	KIF5B	KINH_HUMAN Kinesin-1 heavy chain OS=Homo sapiens OX=9606 GN=KIF5B PE=1 SV=1	|RKC(BTD[C])EEEIAK	|1	|0.63	0.63	NA	1	1
772	P05388	27	RPLP0	RLA0_HUMAN 60S acidic ribosomal protein P0 OS=Homo sapiens OX=9606 GN=RPLP0 PE=1 SV=1	IQLLDDYPKC(BTD[C])FIVGADNVGSK|	1|	0.62|	0.62	NA	1	1
773	Q07020	101	RPL18	RL18_HUMAN 60S ribosomal protein L18 OS=Homo sapiens OX=9606 GN=RPL18 PE=1 SV=2	LKVC(BTD[C])ALR|LKVC(BTD[C])ALR	1|1	0.5|0.7	0.6	0.14142	2	2
774	Q9HD15	134	SRA1	SRA1_HUMAN Steroid receptor RNA activator 1 OS=Homo sapiens OX=9606 GN=SRA1 PE=1 SV=1	KQVC(BTD[C])DDISR|	1|	0.59|	0.59	NA	1	1
775	P04406	152	GAPDH	G3P_HUMAN Glyceraldehyde-3-phosphate dehydrogenase OS=Homo sapiens OX=9606 GN=GAPDH PE=1 SV=3	IISNASC(BTD[C])TTNCLAPLAK|	2|	0.57|	0.57	NA	2	1	Active site, Modified residue, Modified residue, Modified residue, Modified residue
776	O75131	54	CPNE3	CPNE3_HUMAN Copine-3 OS=Homo sapiens OX=9606 GN=CPNE3 PE=1 SV=1	|IKNC(BTD[C])LNPQFSK	|1	|0.35	0.35	NA	1	1
